# Supplementary material for: Concerted action of neuroepithelial basal shrinkage and active epithelial migration ensures efficient optic cup morphogenesis
Source: eLife. 2017 Apr 4;6:e22689. doi: 10.7554/eLife.22689 (PMC5380436; doi:10.7554/eLife.22689)
Supplement: Figure 1—source data 1. — DOI: http://dx.doi.org/10.7554/eLife.22689.003 [file elife-22689-fig1-data1.xlsx]

## Sheet: Sheet1
Figure 1- source data 1
	Average RNE cell basal footprint (µm2)						Average RNE cell apical footprint (µm2)
Developmental stage	15ss	18ss	21ss	24ss	28ss		15ss	18ss	21s	24ss	28ss
	17.3432	14.2577	12.1841	13.7271	12.9682		18.0819	28.8489	15.9948	26.8627	31.0204
	18.6944	17.0181	9.33034	11.1439	10.6667		15.8468	26.0176	23.5422	38.3838	27.9316
	33.8936	29.3315	9.99006	9.46363	9.12147		17.0612	22.271	20.3043	23.6883	34.0388
	27.5306	20.9226	14.3613	8.60918	10.8082		14.3869	23.7069	20.1471	19.0323	23.6961
	32.9288	11.5637	12.3748	8.35433	14.977		17.3296	18.5978	26.8197	27.189	25.9614
	25.8108	14.5557	11.1466	13.6346	12.5087		15.5406	17.2508	20.9962	20.034	23.5238
	30.7618	20.7061	13.7376	11.0804	15.2258		23.2221	17.8439	20.9935	28.3338	30.6273
	29.3143	16.0918	13.6015	12.7636	11.4993		19.3877	12.5703	17.6478	23.0111	23.3227
	34.4326	22.8021	13.4099	11.378	12.8058		16.4519	14.5388	17.608	22.2245	28.9928
	26.9389		19.1364	12.1448	13.5812		12.602		14.2177	23.8228	24.7458
	20.1123
Average	27.0692	18.5833	12.9273	11.23	12.4162		16.9911	20.1829	19.8271	25.2582	27.3861
Std. Deviation	6.072	5.433	2.74	1.93	1.933		2.899	5.389	3.675	5.506	3.725
	Cells per 100µm2 basal area
Developmental stage	15 ss	18ss	21ss	24ss	28ss
	5.76595	7.01376	8.2074	7.28483	7.71115
	5.34918	5.87609	10.7177	8.97352	9.37501
	2.95041	3.40931	10.0099	10.5668	10.9632
	3.63233	4.77953	6.96317	11.6155	9.25222
	3.03685	8.64775	8.08096	11.9698	6.67689
	3.87434	6.87016	8.97131	7.33428	7.99446
	3.25078	4.82949	7.27931	9.02497	6.56778
	3.41131	6.21434	7.3521	7.83478	8.69619
	2.90422	4.38556	7.45721	8.78886	7.80893
	3.71211		5.22564	8.23395	7.36313
	4.97209
Average	3.89633	5.78067	8.02648	9.16273	8.24089
Std. Deviation	1.007	1.605	1.578	1.685	1.353
