# Supplementary material for: Concerted action of neuroepithelial basal shrinkage and active epithelial migration ensures efficient optic cup morphogenesis
Source: eLife. 2017 Apr 4;6:e22689. doi: 10.7554/eLife.22689 (PMC5380436; doi:10.7554/eLife.22689)
Supplement: Figure 1—source data 2. — DOI: http://dx.doi.org/10.7554/eLife.22689.004 [file elife-22689-fig1-data2.xlsx]

## Sheet: Sheet1
Figure 1- source data 2
Normalised intensity distribution - phalloidin
Basal to apical position in RNE	section 1	section 2	section 3	section 4	section 5	section 6	section 7	section 8	section 9	section 10	section 11	section 12	section 13	section 14		Mean	SEM
1	0.935231	0.825309	0.698045	0.682943	0.867164	0.818007	0.898293	0.993825	0.990709	0.864444	1	0.91586	0.874983	0.824933		0.870696	0.0262396
2	0.966422	0.816497	0.824338	0.7218	0.884197	0.897352	0.930747	0.992363	1.00031	0.898776	0.999314	0.957985	0.876429	0.856809		0.901667	0.0215178
3	0.973638	0.815914	0.861495	0.750567	0.914143	0.966876	0.955088	0.983997	1.00393	0.928537	0.988804	0.991945	0.875554	0.87146		0.920139	0.0202672
4	0.975851	0.824314	0.866522	0.779614	0.923884	0.993627	0.967131	1	0.991716	0.938563	0.978101	0.937458	0.884158	0.8785		0.924246	0.018281
5	0.97596	0.859869	0.836545	0.806441	0.932039	0.995976	0.974626	1.00426	0.990627	0.949988	0.961687	0.911497	0.903792	0.903017		0.929023	0.016528
6	0.98112	0.891552	0.823867	0.816608	0.959678	0.998654	0.989116	0.988221	0.995324	0.966727	0.956951	0.899927	0.939822	0.928423		0.938285	0.0160831
7	0.993347	0.89664	0.824053	0.816858	0.978929	1	0.999327	0.985688	1	0.977318	0.951871	0.905274	0.969279	0.934703		0.945235	0.0167229
8	1	0.906037	0.863052	0.828749	0.989955	0.991469	1	0.983104	0.98678	0.977366	0.952005	0.918956	0.988128	0.954222		0.952844	0.0144561
9	0.995402	0.92822	0.903392	0.855081	1	0.989366	0.976428	0.979108	0.986766	0.979537	0.951862	0.944273	1	0.981727		0.962226	0.0112385
10	0.99506	0.942833	0.921698	0.894753	0.996613	0.993635	0.955088	0.9762	0.987662	0.987156	0.940102	0.952571	0.957435	0.991239		0.963718	0.00836968
11	0.993247	0.955137	0.944588	0.921006	0.985953	0.982067	0.940018	0.971949	0.958508	0.987522	0.939291	0.971163	0.908564	1.00025		0.961376	0.00746488
12	0.991224	0.965677	0.976474	0.940251	0.981582	0.958473	0.933825	0.969472	0.931727	0.974895	0.942516	0.975994	0.875598	1		0.958408	0.00851062
13	0.99666	0.999688	0.993501	0.942943	0.979559	0.945142	0.911957	0.970704	0.92911	0.975897	0.912457	0.981674	0.867603	0.989611		0.956893	0.0106322
14	0.994641	1.00319	1	0.938145	0.963352	0.932156	0.884302	0.960767	0.931902	0.976245	0.876096	0.99325	0.857463	0.957341		0.947775	0.0126855
15	0.982682	0.979938	0.994548	0.937397	0.954104	0.925962	0.868343	0.948261	0.923863	0.980875	0.836723	1	0.842517	0.906192		0.934386	0.0145255
16	0.950935	0.960839	0.998259	0.951999	0.932503	0.924893	0.851738	0.928785	0.906825	0.989329	0.818685	0.991326	0.8138	0.865892		0.920415	0.0164461
17	0.921192	0.917876	0.999856	0.96437	0.905375	0.90856	0.844363	0.920621	0.892141	1	0.800048	0.949984	0.794112	0.849586		0.904863	0.0173014
18	0.889347	0.87407	0.97621	0.970655	0.865161	0.889315	0.841289	0.911373	0.875507	0.980123	0.784251	0.883318	0.754404	0.838002		0.88093	0.0177183
19	0.856853	0.835243	0.97609	0.985247	0.836513	0.884987	0.837422	0.892119	0.859417	0.955026	0.772991	0.847454	0.731316	0.825463		0.86401	0.0191566
20	0.812159	0.813134	0.969089	1	0.816158	0.860259	0.832062	0.872516	0.847962	0.942624	0.754776	0.803026	0.716526	0.812382		0.846619	0.0210286
21	0.778153	0.764257	0.936433	0.984185	0.79279	0.84493	0.81729	0.847235	0.824828	0.934416	0.718071	0.77109	0.706168	0.784478		0.821737	0.0219335
22	0.765082	0.720336	0.908317	0.959802	0.778138	0.834593	0.804173	0.828003	0.80822	0.917679	0.69224	0.757821	0.695722	0.746213		0.801167	0.0220347
23	0.755312	0.695836	0.891707	0.937373	0.775771	0.826096	0.789017	0.811945	0.802981	0.90126	0.674178	0.730519	0.678488	0.728845		0.785666	0.0221797
24	0.739913	0.68357	0.844469	0.923398	0.752996	0.816757	0.768397	0.803298	0.812215	0.877604	0.658243	0.722506	0.656759	0.689793		0.767851	0.022031
25	0.713644	0.674169	0.791761	0.90792	0.716036	0.81504	0.749202	0.789895	0.807175	0.856024	0.636844	0.714684	0.643601	0.655985		0.747999	0.0221627
26	0.687783	0.652875	0.748944	0.902128	0.702106	0.829234	0.737038	0.769931	0.785867	0.841893	0.623489	0.695754	0.643141	0.633743		0.732423	0.0228316
27	0.671285	0.633077	0.717571	0.907339	0.668433	0.82909	0.733876	0.759525	0.768459	0.837696	0.621296	0.685104	0.634802	0.626022		0.72097	0.0239716
28	0.644603	0.621358	0.678958	0.890595	0.640157	0.818055	0.729742	0.753932	0.754444	0.829983	0.626672	0.665768	0.619699	0.616742		0.706479	0.0241942
29	0.626721	0.621396	0.649794	0.882549	0.619689	0.807887	0.717371	0.745666	0.752087	0.809752	0.636074	0.653147	0.607376	0.609667		0.695655	0.0240632
30	0.618124	0.629602	0.638197	0.867562	0.607302	0.795705	0.70526	0.743519	0.741496	0.795133	0.623973	0.646845	0.59248	0.587449		0.685189	0.0238775
31	0.607406	0.638281	0.618862	0.836633	0.598405	0.775933	0.691169	0.739919	0.72144	0.786012	0.612413	0.635027	0.584207	0.577503		0.673087	0.0226557
32	0.592996	0.633528	0.598402	0.805716	0.592985	0.757605	0.678662	0.728713	0.706747	0.765374	0.593427	0.621427	0.582873	0.575202		0.659547	0.0211808
33	0.58101	0.625667	0.587979	0.76036	0.579155	0.749492	0.667875	0.720789	0.700606	0.751367	0.587795	0.615089	0.580518	0.573907		0.648686	0.0196318
34	0.573901	0.618341	0.574168	0.73285	0.562722	0.734914	0.646165	0.713891	0.693114	0.729298	0.582227	0.607855	0.578522	0.564069		0.636574	0.0185784
35	0.560349	0.607966	0.56109	0.702086	0.559387	0.720031	0.639053	0.708652	0.689828	0.7095	0.582221	0.601761	0.56797	0.548684		0.625612	0.0178227
36	0.547296	0.601701	0.555776	0.692543	0.558143	0.711889	0.623184	0.700569	0.683379	0.685661	0.57943	0.591098	0.558676	0.532277		0.61583	0.01751
37	0.528931	0.590772	0.553686	0.676792	0.548618	0.698774	0.607719	0.698369	0.671876	0.674005	0.576506	0.576443	0.542767	0.524951		0.605015	0.0174809
38	0.512069	0.583239	0.546151	0.663253	0.54102	0.697035	0.596364	0.694321	0.663998	0.673849	0.576081	0.566319	0.529763	0.517778		0.597231	0.0180901
39	0.494298	0.570164	0.535148	0.639132	0.53603	0.684372	0.587602	0.688552	0.662807	0.663651	0.571541	0.553287	0.515106	0.523005		0.587478	0.0179949
40	0.477364	0.558947	0.525706	0.630693	0.524523	0.670775	0.580288	0.679044	0.65737	0.649306	0.564362	0.54115	0.507676	0.519281		0.577606	0.0180053
41	0.468048	0.549376	0.520437	0.625882	0.516259	0.660377	0.574386	0.67087	0.65593	0.629247	0.560825	0.539323	0.507381	0.52066		0.571357	0.0175252
42	0.459062	0.540367	0.524359	0.60861	0.5102	0.64342	0.573327	0.668062	0.65894	0.616182	0.553203	0.52783	0.507169	0.528993		0.565694	0.0170369
43	0.448843	0.534693	0.528048	0.588106	0.507858	0.634488	0.570233	0.66852	0.658442	0.600971	0.551358	0.517009	0.497243	0.531848		0.559833	0.0170614
44	0.438618	0.527484	0.535665	0.574709	0.506952	0.627042	0.568124	0.666745	0.649898	0.600121	0.546066	0.512929	0.486151	0.536623		0.555509	0.017095
45	0.430992	0.522029	0.543619	0.570488	0.49858	0.616412	0.560431	0.663789	0.637159	0.588552	0.546188	0.512487	0.481503	0.540706		0.550924	0.0167049
46	0.430244	0.518248	0.543377	0.569458	0.492717	0.611491	0.551767	0.655699	0.625731	0.585467	0.544418	0.509116	0.480341	0.538907		0.546927	0.0161635
47	0.430859	0.516352	0.541134	0.564429	0.489024	0.607634	0.542493	0.648625	0.615856	0.585916	0.541396	0.502683	0.469632	0.549284		0.543237	0.0159318
48	0.43002	0.508503	0.540717	0.553372	0.481063	0.599989	0.537695	0.642564	0.605971	0.584517	0.534935	0.502086	0.465774	0.552913		0.53858	0.0156031
49	0.427693	0.50035	0.532831	0.543762	0.460529	0.581666	0.536754	0.628784	0.588083	0.581728	0.53179	0.495827	0.464307	0.540317		0.529601	0.0149142
50	0.425118	0.495395	0.527369	0.530319	0.448817	0.569382	0.534657	0.627665	0.570204	0.580309	0.527074	0.483275	0.467247	0.533289		0.522866	0.0147286
51	0.418592	0.490017	0.524464	0.516151	0.443135	0.56001	0.53445	0.62971	0.558036	0.585688	0.527044	0.484099	0.464395	0.527707		0.518821	0.0150463
52	0.413535	0.482437	0.516798	0.506871	0.431509	0.556095	0.530883	0.633683	0.548538	0.590657	0.527337	0.48172	0.458646	0.521459		0.514298	0.0158533
53	0.412182	0.479255	0.512773	0.509811	0.423699	0.55628	0.529599	0.629077	0.53966	0.588647	0.527671	0.472075	0.454442	0.523596		0.51134	0.0160248
54	0.413092	0.476935	0.511291	0.517394	0.418318	0.553852	0.525977	0.621269	0.530724	0.588878	0.521552	0.466851	0.442504	0.525305		0.508139	0.0160517
55	0.414761	0.475468	0.507882	0.520758	0.413581	0.550924	0.521343	0.612621	0.522701	0.598945	0.516738	0.459543	0.436251	0.524487		0.505429	0.0162458
56	0.415056	0.471964	0.501288	0.511884	0.405059	0.548737	0.514658	0.605128	0.520476	0.610017	0.513479	0.452037	0.431746	0.522061		0.501685	0.0167252
57	0.419026	0.46467	0.490687	0.501946	0.401529	0.545458	0.509251	0.590401	0.515916	0.617487	0.512252	0.448308	0.423156	0.514541		0.496759	0.0167011
58	0.420786	0.461459	0.48042	0.490822	0.397288	0.541228	0.505966	0.578646	0.508952	0.61878	0.512642	0.441909	0.41847	0.510817		0.492013	0.0166232
59	0.414989	0.463206	0.465258	0.479191	0.38964	0.542884	0.509838	0.57787	0.505995	0.618692	0.513647	0.434316	0.413098	0.517042		0.488976	0.0174099
60	0.411861	0.465119	0.45389	0.472511	0.387289	0.54327	0.509792	0.56845	0.504593	0.629814	0.513367	0.433134	0.412044	0.51886		0.487428	0.0179478
61	0.409957	0.464108	0.449622	0.464154	0.384677	0.544535	0.513848	0.558045	0.501401	0.63634	0.51271	0.431331	0.412694	0.521162		0.486042	0.0182884
62	0.407216	0.464086	0.445553	0.448268	0.385283	0.545805	0.516101	0.5521	0.499063	0.63971	0.510455	0.425264	0.410861	0.526867		0.484045	0.0187654
63	0.406858	0.4656	0.453021	0.447046	0.384914	0.546805	0.517189	0.540787	0.49616	0.643092	0.505693	0.421817	0.411381	0.53659		0.484068	0.018831
64	0.403754	0.46371	0.460296	0.441942	0.381157	0.548338	0.516935	0.542058	0.496469	0.657139	0.500603	0.423241	0.410387	0.539151		0.484656	0.0197383
65	0.400147	0.468456	0.466801	0.43448	0.38173	0.548147	0.518447	0.54687	0.489758	0.664881	0.498321	0.42068	0.406829	0.545608		0.485083	0.0204931
66	0.391845	0.47415	0.467042	0.43229	0.382181	0.5484	0.520886	0.547565	0.491392	0.669254	0.492742	0.418262	0.41105	0.549247		0.48545	0.0209378
67	0.387695	0.484612	0.46636	0.429863	0.37525	0.547467	0.522829	0.555065	0.492893	0.673762	0.487413	0.417267	0.421508	0.543007		0.486071	0.0213308
68	0.386583	0.490748	0.464761	0.432534	0.371469	0.54934	0.520756	0.580942	0.49592	0.679689	0.475049	0.420146	0.430173	0.551085		0.489228	0.0222183
69	0.386294	0.499941	0.460153	0.430746	0.372153	0.54843	0.519594	0.601316	0.50122	0.672759	0.472956	0.423612	0.433244	0.543156		0.490398	0.0222491
70	0.386155	0.514483	0.450803	0.429473	0.36906	0.545628	0.512667	0.605102	0.510317	0.666416	0.470887	0.430888	0.436792	0.542418		0.490792	0.0221175
71	0.388412	0.518159	0.445355	0.431473	0.375653	0.547447	0.508203	0.607453	0.514189	0.665967	0.470956	0.43979	0.445189	0.541292		0.492824	0.021737
72	0.391692	0.52082	0.440688	0.429098	0.381423	0.551263	0.51239	0.60016	0.512767	0.67002	0.471046	0.442036	0.456962	0.533667		0.49386	0.0213949
73	0.395664	0.529212	0.439242	0.433277	0.389009	0.554594	0.514691	0.585533	0.519452	0.672021	0.473082	0.449404	0.46408	0.526684		0.496139	0.0206703
74	0.399911	0.528461	0.443455	0.436196	0.394326	0.562426	0.51222	0.57772	0.528381	0.674914	0.475833	0.452794	0.462896	0.518873		0.497743	0.0203303
75	0.396338	0.529507	0.445118	0.442089	0.395532	0.561879	0.50997	0.566328	0.54304	0.672566	0.476052	0.457578	0.467002	0.514998		0.498428	0.0199598
76	0.395356	0.535596	0.445719	0.452341	0.402654	0.561054	0.504905	0.546551	0.558667	0.67268	0.471444	0.455811	0.469742	0.519654		0.499441	0.0196335
77	0.396027	0.554442	0.441366	0.456806	0.409244	0.562501	0.499315	0.525888	0.567683	0.677017	0.468741	0.452379	0.462896	0.52438		0.499906	0.0200307
78	0.394888	0.558236	0.444014	0.456273	0.413904	0.556155	0.492072	0.509006	0.580422	0.674906	0.467001	0.45061	0.455586	0.528253		0.498666	0.0201001
79	0.403454	0.555694	0.450033	0.4587	0.421226	0.550375	0.483282	0.494234	0.579147	0.666955	0.465297	0.440275	0.451871	0.512181		0.495195	0.0191484
80	0.412522	0.555436	0.455948	0.466031	0.428707	0.553813	0.480624	0.47456	0.574927	0.661571	0.466336	0.437655	0.447066	0.500676		0.493991	0.0184357
81	0.423672	0.557995	0.462934	0.47851	0.441919	0.552765	0.478191	0.458082	0.5723	0.668582	0.468335	0.434441	0.445062	0.488444		0.495088	0.0183341
82	0.437472	0.556497	0.467532	0.492014	0.457579	0.547612	0.477349	0.448105	0.568945	0.674676	0.468732	0.441695	0.445211	0.485186		0.497757	0.0178955
83	0.451712	0.549026	0.472762	0.508903	0.470477	0.53562	0.477083	0.444061	0.559747	0.673504	0.467646	0.446206	0.447358	0.487098		0.499372	0.0168864
84	0.45866	0.541847	0.470197	0.541197	0.480164	0.527749	0.47528	0.438746	0.555212	0.68551	0.463537	0.457671	0.449871	0.494803		0.502889	0.0173172
85	0.468682	0.537936	0.467892	0.557945	0.491694	0.536852	0.47608	0.439634	0.546524	0.695225	0.463124	0.467003	0.453865	0.51001		0.508033	0.0176198
86	0.463223	0.540538	0.468499	0.565385	0.497302	0.54087	0.475567	0.434477	0.546609	0.698117	0.461373	0.470741	0.459818	0.507718		0.509303	0.0180147
87	0.458833	0.554852	0.46639	0.566917	0.501908	0.539548	0.471747	0.429739	0.549173	0.703564	0.460349	0.47687	0.465971	0.526291		0.512296	0.0186508
88	0.456322	0.576064	0.46373	0.564767	0.506173	0.53732	0.471297	0.434107	0.5644	0.703314	0.459607	0.478532	0.471652	0.538315		0.516114	0.0190449
89	0.448735	0.593732	0.460901	0.574785	0.505717	0.530554	0.468388	0.433823	0.557333	0.694979	0.453188	0.482846	0.48468	0.543614		0.516663	0.0191752
90	0.443936	0.603371	0.460196	0.569715	0.498649	0.516464	0.46436	0.435852	0.54705	0.687569	0.452175	0.491847	0.493898	0.553369		0.515604	0.0189211
91	0.437202	0.610598	0.461888	0.560032	0.495954	0.502594	0.463107	0.438952	0.543907	0.689646	0.45035	0.491628	0.501654	0.558418		0.514709	0.0192093
92	0.43186	0.61233	0.460639	0.544195	0.500415	0.488519	0.467302	0.444742	0.527547	0.689666	0.446929	0.496742	0.517509	0.563433		0.513702	0.0190833
93	0.429864	0.614428	0.461182	0.521449	0.505713	0.469957	0.476686	0.459353	0.509869	0.711364	0.447419	0.491584	0.524197	0.570421		0.513821	0.0201081
94	0.430052	0.613719	0.471783	0.501664	0.506278	0.466003	0.491693	0.474419	0.501675	0.7313	0.452492	0.48535	0.539508	0.581249		0.517656	0.0210069
95	0.427369	0.617982	0.487827	0.479103	0.514045	0.477549	0.499943	0.489526	0.498507	0.721036	0.456234	0.472845	0.561398	0.599029		0.5216	0.0208537
96	0.426949	0.619721	0.510792	0.448688	0.551057	0.480957	0.522695	0.519093	0.494491	0.718954	0.455648	0.458786	0.591357	0.600158		0.528525	0.0215971
97	0.434591	0.611496	0.551136	0.427668	0.627579	0.477677	0.55528	0.550788	0.477937	0.712641	0.457147	0.452391	0.615813	0.587535		0.538548	0.0230913
98	0.460234	0.60769	0.590394	0.414556	0.734966	0.49302	0.588924	0.596407	0.460785	0.69791	0.462094	0.44632	0.647524	0.576864		0.555549	0.0267883
99	0.497911	0.605811	0.613571	0.417392	0.791445	0.509455	0.615462	0.603484	0.455147	0.690301	0.472237	0.440984	0.672514	0.576825		0.568753	0.0288953
100	0.53436	0.635281	0.635118	0.417946	0.836587	0.498966	0.635072	0.55023	0.459025	0.7002	0.483438	0.441282	0.670208	0.608132		0.578989	0.031214
