# Supplementary material for: Concerted action of neuroepithelial basal shrinkage and active epithelial migration ensures efficient optic cup morphogenesis
Source: eLife. 2017 Apr 4;6:e22689. doi: 10.7554/eLife.22689 (PMC5380436; doi:10.7554/eLife.22689)
Supplement: Figure 1—source data 3. — DOI: http://dx.doi.org/10.7554/eLife.22689.005 [file elife-22689-fig1-data3.xlsx]

## Sheet: Sheet1
Figure 1- source data 3
Normalised intensity distribution - anti-phosphomyosin
Basal to apical position in RNE	section 1	section 2	section 3	section 4	section 5	section 6	section 7	section 8	section 9	section 10	section 11	section 12	section 13	section 14	section 15		Mean	SEM
1	0.830184	0.815009	0.702159	0.689452	0.777214	0.777962	0.893219	0.846314	0.970608	0.857433	0.670374	0.941575	0.948327	0.834756	0.783847		0.822562	0.0238902
2	0.841866	0.81635	0.765641	0.720692	0.779695	0.846733	0.934664	0.878887	1	0.869376	0.662705	0.934992	0.987819	0.861154	0.822627		0.848213	0.0242005
3	0.856211	0.823999	0.794556	0.733124	0.801859	0.909393	0.954713	0.949411	0.984905	0.89298	0.651901	0.963774	1	0.892201	0.842092		0.870074	0.025324
4	0.879307	0.848989	0.836003	0.759357	0.839066	0.939172	0.963208	0.967639	0.971365	0.917098	0.630889	0.976536	0.96756	0.908749	0.856834		0.884118	0.0246024
5	0.885747	0.872294	0.851213	0.768918	0.85527	0.956137	0.962985	0.983127	0.968181	0.924661	0.612828	0.985033	0.958396	0.928328	0.882296		0.893028	0.0253842
6	0.879896	0.881587	0.84264	0.820477	0.88448	0.947588	0.977741	1	0.971298	0.94992	0.610664	1	0.944087	0.961858	0.912041		0.905619	0.0254145
7	0.877165	0.893715	0.840297	0.824531	0.910771	0.960707	0.989828	0.979133	0.991017	0.949993	0.614241	0.992312	0.954971	0.987472	0.956868		0.914868	0.0257744
8	0.884855	0.924272	0.854627	0.818155	0.922694	0.983662	0.997748	0.9613	0.998625	0.951177	0.615592	0.987	0.975441	1	0.972969		0.923208	0.0261991
9	0.890246	0.938102	0.871764	0.852298	0.935074	0.985065	1	0.953527	0.975228	0.981575	0.623149	0.97666	0.974935	0.988505	0.991978		0.929207	0.0248712
10	0.906146	0.933207	0.888206	0.877507	0.952921	0.990519	0.991404	0.9513	0.95318	0.980335	0.619943	0.966596	0.975092	0.965667	0.996664		0.929913	0.0240821
11	0.924181	0.955292	0.918216	0.892761	0.969707	0.985355	0.983598	0.983925	0.960698	0.969668	0.605669	0.967493	0.957821	0.943952	0.991377		0.933981	0.0245173
12	0.955517	0.972219	0.933854	0.923891	0.997489	0.983538	0.982979	0.997268	0.958738	0.952112	0.600741	0.960697	0.964449	0.94269	1		0.941746	0.0250794
13	0.987373	1	0.938089	0.946098	1	0.998286	0.959853	0.976922	0.967062	0.955723	0.601497	0.941658	0.994295	0.945489	0.997435		0.947319	0.0254184
14	1	0.994943	0.934865	0.912377	1.00063	1	0.931198	0.958303	0.947991	0.971561	0.59453	0.921696	0.987475	0.934558	0.979184		0.937954	0.0257827
15	0.991392	0.975889	0.982441	0.921522	0.996085	0.992083	0.899904	0.944333	0.912683	0.961803	0.587546	0.89652	0.982242	0.91269	0.985557		0.929513	0.0261724
16	0.974485	0.963771	0.995331	0.946858	0.983181	0.974325	0.876636	0.947139	0.890074	0.962347	0.580852	0.874912	0.985254	0.90989	0.97069		0.922383	0.0264961
17	0.973984	0.940951	0.996982	0.944493	0.965244	0.930987	0.858536	0.913976	0.884478	1	0.579045	0.861523	0.993956	0.895694	0.969367		0.913948	0.0268275
18	0.946598	0.933042	0.992468	0.952851	0.946175	0.910891	0.858647	0.892449	0.883193	0.996684	0.579573	0.846172	0.950538	0.889866	0.973929		0.903538	0.0259817
19	0.910547	0.91318	1	0.979156	0.946851	0.932657	0.864271	0.893805	0.891891	0.991356	0.562478	0.824876	0.925164	0.901302	0.973735		0.900751	0.0271825
20	0.880664	0.898594	0.9906	1	0.940469	0.925422	0.863304	0.876696	0.901537	0.995448	0.558641	0.803705	0.887181	0.908722	0.973578		0.893637	0.0278359
21	0.862443	0.860103	0.961586	0.967683	0.921627	0.903909	0.855529	0.839983	0.895561	0.96812	0.545602	0.784874	0.867885	0.903885	0.963285		0.873472	0.027207
22	0.852718	0.841088	0.942784	0.95452	0.903055	0.865504	0.848339	0.827206	0.857954	0.957251	0.535791	0.751252	0.866725	0.895099	0.959986		0.857285	0.0273301
23	0.851037	0.83601	0.937958	0.963569	0.894807	0.847218	0.835804	0.788074	0.838005	0.971041	0.531427	0.723419	0.821809	0.86582	0.959389		0.844359	0.028596
24	0.854199	0.817825	0.918516	0.952743	0.869219	0.836151	0.823547	0.758682	0.815487	0.957699	0.528869	0.714242	0.812119	0.848478	0.944598		0.830158	0.0280076
25	0.843283	0.808168	0.882523	0.958025	0.848373	0.83625	0.813259	0.744199	0.822243	0.903998	0.521687	0.709801	0.814453	0.842315	0.917043		0.817708	0.0265979
26	0.806373	0.78402	0.856741	0.948648	0.828806	0.851586	0.805248	0.734557	0.79085	0.89045	0.517869	0.697226	0.829897	0.817918	0.923778		0.805598	0.0265388
27	0.796443	0.772606	0.834561	0.918457	0.800748	0.85744	0.805095	0.727994	0.763791	0.868262	0.516545	0.694523	0.813701	0.796884	0.917333		0.792292	0.0253562
28	0.786218	0.734216	0.811453	0.918887	0.760704	0.837693	0.799715	0.727986	0.750753	0.855987	0.528207	0.698575	0.790858	0.776711	0.878686		0.77711	0.0234633
29	0.776593	0.720402	0.777077	0.932345	0.740139	0.819028	0.771191	0.706777	0.760075	0.838696	0.533018	0.692044	0.774785	0.768948	0.850925		0.764136	0.0228156
30	0.763066	0.697212	0.763868	0.951182	0.732043	0.804423	0.744603	0.675316	0.764782	0.798951	0.533882	0.67923	0.770991	0.75991	0.824765		0.750948	0.0231928
31	0.744049	0.684965	0.742092	0.94151	0.725667	0.798084	0.733655	0.6521	0.739279	0.774219	0.534378	0.662919	0.750698	0.737762	0.836747		0.737208	0.0232745
32	0.727302	0.686134	0.744007	0.899241	0.714899	0.777709	0.703221	0.650333	0.724142	0.744239	0.532638	0.65438	0.740841	0.724468	0.828766		0.723488	0.0212145
33	0.699221	0.702268	0.749312	0.865335	0.722196	0.746506	0.680948	0.630484	0.70408	0.738583	0.529347	0.64981	0.731849	0.720082	0.79956		0.711305	0.0195404
34	0.692866	0.689587	0.743442	0.846903	0.716393	0.728806	0.650396	0.616836	0.680819	0.718354	0.527331	0.636643	0.710528	0.708852	0.780447		0.696547	0.0189131
35	0.683132	0.656884	0.705549	0.819127	0.708936	0.699097	0.641083	0.613147	0.683472	0.70458	0.530868	0.630387	0.701035	0.689468	0.767185		0.682263	0.0170593
36	0.672379	0.641515	0.694053	0.81571	0.69056	0.699284	0.626345	0.61263	0.691332	0.692037	0.531051	0.620649	0.68425	0.686632	0.740004		0.673229	0.0164767
37	0.642774	0.639317	0.695903	0.809789	0.67405	0.686526	0.618967	0.630993	0.686987	0.684507	0.529115	0.620852	0.678962	0.664665	0.722145		0.665703	0.015679
38	0.616513	0.636094	0.689173	0.782955	0.658185	0.687116	0.613841	0.622951	0.681373	0.677243	0.517891	0.61251	0.67083	0.643324	0.718733		0.655249	0.015335
39	0.596018	0.624429	0.660537	0.756876	0.630778	0.662458	0.605248	0.619466	0.675298	0.655432	0.512919	0.606212	0.660374	0.624495	0.682509		0.638203	0.0137437
40	0.576261	0.6137	0.652368	0.752932	0.594679	0.647588	0.595479	0.62261	0.677017	0.635485	0.52154	0.609153	0.655263	0.623196	0.671511		0.629919	0.0135253
41	0.581023	0.587052	0.659918	0.73791	0.581833	0.655315	0.580435	0.626066	0.672453	0.61832	0.526803	0.608686	0.634921	0.61835	0.685095		0.624945	0.0134644
42	0.575345	0.571113	0.633953	0.720957	0.576476	0.638284	0.57495	0.622508	0.692613	0.606446	0.523901	0.594529	0.63441	0.603348	0.676831		0.616378	0.013433
43	0.561351	0.559405	0.615929	0.695257	0.57619	0.621025	0.571508	0.610093	0.701883	0.604275	0.512208	0.594747	0.629024	0.603474	0.679283		0.609043	0.0135293
44	0.549518	0.552668	0.635915	0.677164	0.560019	0.62899	0.563817	0.598884	0.676662	0.558667	0.524648	0.596256	0.628091	0.594282	0.67114		0.601115	0.0128959
45	0.540336	0.555303	0.65839	0.646511	0.558991	0.60265	0.561966	0.608852	0.658296	0.551506	0.524648	0.592376	0.628204	0.574821	0.649251		0.59414	0.0117858
46	0.534244	0.546179	0.636293	0.657785	0.558561	0.592266	0.557911	0.610114	0.650432	0.556234	0.522533	0.609729	0.626101	0.554806	0.642184		0.590358	0.0117901
47	0.523825	0.537492	0.622552	0.665527	0.554654	0.592226	0.559717	0.599597	0.661288	0.56015	0.52657	0.606175	0.612927	0.546403	0.611672		0.585385	0.011751
48	0.511323	0.530198	0.606253	0.679326	0.532455	0.584973	0.560681	0.59375	0.666729	0.558316	0.527067	0.596552	0.600156	0.538424	0.596725		0.578862	0.0127359
49	0.510147	0.533023	0.589256	0.653528	0.513544	0.560391	0.550356	0.591397	0.62904	0.54189	0.52759	0.586872	0.588879	0.545285	0.589179		0.567358	0.0106928
50	0.510086	0.533807	0.593669	0.60694	0.489395	0.555124	0.546785	0.60671	0.587009	0.530624	0.531212	0.580709	0.583253	0.546615	0.585		0.559129	0.00927449
51	0.508026	0.528015	0.596856	0.589908	0.489059	0.540875	0.540016	0.612137	0.57159	0.530464	0.540191	0.583562	0.566193	0.54602	0.574622		0.554502	0.00884839
52	0.501475	0.509839	0.583912	0.575499	0.474807	0.527309	0.537733	0.622227	0.578844	0.538004	0.545231	0.594124	0.564601	0.524584	0.558921		0.549141	0.0100421
53	0.496787	0.502414	0.567685	0.56794	0.464684	0.530487	0.546117	0.62208	0.568123	0.532613	0.558019	0.600225	0.562203	0.509442	0.562474		0.546086	0.0105871
54	0.486352	0.503032	0.569793	0.601512	0.452422	0.523697	0.556265	0.623041	0.568014	0.526525	0.563528	0.578945	0.558699	0.497311	0.556311		0.544363	0.0117921
55	0.482604	0.505536	0.581625	0.606949	0.440535	0.510979	0.555221	0.620773	0.565478	0.529271	0.574864	0.571231	0.554881	0.496892	0.569028		0.544391	0.0126823
56	0.475824	0.516035	0.565006	0.583122	0.428656	0.508538	0.549646	0.622451	0.540469	0.539039	0.577377	0.554837	0.549516	0.49292	0.574098		0.538502	0.0124423
57	0.475984	0.50961	0.546331	0.573731	0.427289	0.510938	0.540013	0.615126	0.531504	0.548926	0.584174	0.551185	0.542253	0.486898	0.549664		0.532908	0.0119092
58	0.475578	0.501205	0.541035	0.571401	0.428014	0.506324	0.540041	0.614426	0.544651	0.569045	0.595206	0.553987	0.530426	0.471854	0.56245		0.533709	0.012838
59	0.478906	0.498958	0.537773	0.555087	0.427548	0.519634	0.543218	0.615285	0.548879	0.594139	0.603447	0.558386	0.54615	0.474334	0.548148		0.536659	0.0130949
60	0.486373	0.494293	0.533176	0.543091	0.432406	0.53469	0.541147	0.611547	0.536256	0.622143	0.619446	0.560046	0.543187	0.474816	0.543489		0.538407	0.0137068
61	0.495481	0.500779	0.525634	0.527342	0.432538	0.527525	0.547815	0.605554	0.522034	0.627435	0.622818	0.55146	0.516117	0.474667	0.546978		0.534945	0.0136993
62	0.486182	0.503445	0.515096	0.48336	0.427369	0.509151	0.555437	0.603677	0.518632	0.629202	0.633496	0.539098	0.526907	0.475867	0.561647		0.531238	0.0149202
63	0.467468	0.515413	0.530187	0.476855	0.418322	0.517152	0.568693	0.599182	0.516755	0.640061	0.647662	0.533381	0.520421	0.47579	0.577982		0.533688	0.0164955
64	0.467715	0.531082	0.545941	0.478141	0.417351	0.540912	0.582018	0.598693	0.531312	0.650459	0.666837	0.527031	0.524888	0.474122	0.579495		0.541066	0.0174661
65	0.464615	0.533932	0.548192	0.475941	0.418746	0.548462	0.584955	0.573352	0.511487	0.653831	0.705409	0.531342	0.524834	0.49036	0.582064		0.543168	0.0186849
66	0.454668	0.538511	0.515378	0.464644	0.411052	0.536904	0.587249	0.558458	0.500978	0.662932	0.729202	0.533313	0.528588	0.490662	0.574263		0.53912	0.0205846
67	0.457878	0.550951	0.528207	0.476324	0.411083	0.543257	0.586173	0.566002	0.513134	0.702631	0.739112	0.535528	0.539772	0.496671	0.564075		0.547386	0.0217092
68	0.461456	0.561924	0.529283	0.490288	0.411314	0.539238	0.577553	0.579105	0.517728	0.699159	0.759829	0.517143	0.548749	0.504596	0.554565		0.550129	0.0221912
69	0.459614	0.560691	0.522955	0.479903	0.414289	0.533637	0.565237	0.591283	0.532039	0.691556	0.797659	0.513413	0.545712	0.504325	0.537705		0.550001	0.0238887
70	0.450541	0.575901	0.538403	0.471408	0.416477	0.533857	0.572082	0.583201	0.542775	0.682349	0.810139	0.521791	0.551953	0.507458	0.536076		0.552961	0.0243453
71	0.459863	0.610502	0.537243	0.486188	0.417649	0.531078	0.574428	0.570481	0.544843	0.689812	0.838265	0.528888	0.562837	0.521938	0.553952		0.561865	0.0255309
72	0.475477	0.621845	0.51944	0.494304	0.423262	0.541998	0.578044	0.568384	0.554671	0.713231	0.854158	0.530579	0.575912	0.530409	0.554395		0.569074	0.0264733
73	0.49353	0.641613	0.505268	0.511171	0.430175	0.558567	0.575764	0.563197	0.562415	0.739889	0.869831	0.535731	0.579199	0.53736	0.541335		0.576336	0.0275811
74	0.514441	0.647514	0.51211	0.508382	0.437646	0.567277	0.565825	0.570591	0.55062	0.765635	0.880643	0.542496	0.569495	0.548003	0.534926		0.58104	0.0284167
75	0.533962	0.646743	0.517602	0.530401	0.447692	0.556867	0.570607	0.578759	0.546765	0.778589	0.890637	0.544804	0.572723	0.563596	0.560728		0.589365	0.0283442
76	0.555416	0.651781	0.52837	0.54462	0.463024	0.565636	0.574296	0.566694	0.562595	0.793374	0.905984	0.547626	0.581067	0.570124	0.548741		0.59729	0.0287444
77	0.558763	0.676055	0.534719	0.541029	0.468678	0.585215	0.574076	0.557061	0.587405	0.818344	0.904092	0.55311	0.581288	0.567694	0.536737		0.602951	0.0295178
78	0.573899	0.687441	0.535596	0.563735	0.473078	0.601325	0.581976	0.553792	0.595017	0.811852	0.91719	0.562292	0.591238	0.572644	0.52158		0.60951	0.0296742
79	0.590752	0.681944	0.531165	0.563781	0.486704	0.605957	0.587997	0.561971	0.58661	0.834591	0.932948	0.564891	0.590059	0.571652	0.527433		0.614564	0.0306748
80	0.600494	0.68019	0.544104	0.570399	0.515074	0.620019	0.594359	0.554435	0.55914	0.844067	0.958485	0.582934	0.596073	0.586213	0.524045		0.622002	0.0315404
81	0.612487	0.680536	0.55844	0.580825	0.529064	0.613797	0.605453	0.556491	0.56804	0.838921	0.958758	0.584517	0.59964	0.577747	0.517462		0.625479	0.0308996
82	0.615398	0.683027	0.568271	0.591797	0.561397	0.618966	0.619405	0.556039	0.563466	0.87923	0.966579	0.578042	0.615748	0.582778	0.508242		0.633892	0.032239
83	0.602073	0.689443	0.577623	0.627049	0.573973	0.635061	0.624559	0.547143	0.563398	0.907254	0.97948	0.585902	0.627241	0.598894	0.522101		0.64408	0.0332491
84	0.592753	0.677111	0.56808	0.628057	0.577455	0.646579	0.631109	0.538381	0.582902	0.897426	0.97884	0.585533	0.623202	0.604429	0.562551		0.646294	0.0321858
85	0.577859	0.670875	0.566742	0.619683	0.585099	0.66865	0.634471	0.547538	0.580916	0.90424	0.978898	0.588662	0.611841	0.612445	0.5831		0.648735	0.0321792
86	0.578249	0.677144	0.558047	0.625835	0.614061	0.680774	0.638448	0.549964	0.590736	0.923126	0.979793	0.608147	0.606465	0.631369	0.569887		0.65547	0.0326701
87	0.576473	0.685785	0.550446	0.639486	0.644617	0.696744	0.644859	0.552338	0.620445	0.936936	0.992327	0.60188	0.606721	0.643221	0.593817		0.66574	0.0332777
88	0.575696	0.699786	0.556911	0.63582	0.65496	0.7127	0.647393	0.569561	0.6228	0.939267	0.991316	0.601367	0.607375	0.653382	0.608551		0.671792	0.0328778
89	0.592432	0.719869	0.56541	0.651925	0.671395	0.713838	0.659559	0.564732	0.605086	0.953859	1	0.6016	0.599213	0.660369	0.611842		0.678075	0.0337187
90	0.62355	0.729223	0.580504	0.654161	0.676843	0.695133	0.669182	0.577219	0.617178	0.94491	0.996955	0.604624	0.612907	0.66911	0.630331		0.685455	0.0319227
91	0.628299	0.732471	0.580941	0.643933	0.682778	0.67856	0.663276	0.579899	0.636429	0.910053	0.986643	0.599442	0.6085	0.691767	0.667691		0.686045	0.0298445
92	0.623797	0.736269	0.587314	0.660413	0.706411	0.664289	0.671653	0.588298	0.628249	0.895324	0.967835	0.593715	0.602805	0.703299	0.688531		0.68788	0.0284273
93	0.615584	0.735366	0.616218	0.661674	0.711878	0.655161	0.683809	0.582863	0.636697	0.907002	0.965224	0.587256	0.597685	0.712499	0.701716		0.691375	0.0286543
94	0.620487	0.733058	0.649966	0.634328	0.711522	0.656923	0.680683	0.5759	0.656454	0.909018	0.948827	0.584667	0.596623	0.725081	0.715018		0.693237	0.0279157
95	0.626547	0.728369	0.657777	0.625111	0.71287	0.658975	0.679065	0.575709	0.66818	0.916833	0.942835	0.588698	0.587027	0.739169	0.716817		0.694932	0.0280227
96	0.627317	0.729511	0.67101	0.62372	0.721595	0.650341	0.679128	0.573347	0.690522	0.916538	0.933896	0.584465	0.575401	0.75258	0.718898		0.696551	0.028092
97	0.632862	0.730273	0.695305	0.642969	0.73972	0.6394	0.687567	0.576987	0.690107	0.917944	0.921536	0.583598	0.572527	0.764382	0.727977		0.701544	0.0276545
98	0.644393	0.723514	0.701612	0.631772	0.757854	0.631104	0.701951	0.601975	0.66913	0.921359	0.900587	0.585788	0.557893	0.769868	0.744135		0.702862	0.0272678
99	0.665807	0.721914	0.709016	0.625703	0.768511	0.625771	0.712715	0.605358	0.646596	0.908471	0.890038	0.593139	0.555048	0.761726	0.78164		0.704763	0.0268652
100	0.683313	0.726297	0.70072	0.624262	0.764988	0.606056	0.727185	0.593555	0.637632	0.884867	0.85139	0.595473	0.557569	0.749686	0.755892		0.697259	0.0248329
