# Supplementary material for: Concerted action of neuroepithelial basal shrinkage and active epithelial migration ensures efficient optic cup morphogenesis
Source: eLife. 2017 Apr 4;6:e22689. doi: 10.7554/eLife.22689 (PMC5380436; doi:10.7554/eLife.22689)
Supplement: Figure 2—source data 1. — DOI: http://dx.doi.org/10.7554/eLife.22689.010 [file elife-22689-fig2-data1.xlsx]

## Sheet: Sheet1
Figure 2- source data 1
Rockout treatment batch (7 hr)	I	II	III	IV	V
Mild phenotype with OCM	8	1	11	14	11
Accumulation of cells at the rim	20	18	11	9	9
Strong phenotype with developmental delay	10	16	4	9	7
Death	2	4	1	0	0
Total	40	39	27	32	27
Aproax. Percentage of total	I	II	III	IV	V	Average
Mild phenotype with OCM	20	2.56	40.7	43.75	40.74	29.55
Accumulation of cells at the rim	50	46.15	40.7	28.1	33.33	39.656
Strong phenotype with developmental delay	25	41	14.8	28.1	25.92	26.964
Death	5	10	3.7	0	0	3.74
Total	100	100	100	100	100	100
