# Supplementary material for: Concerted action of neuroepithelial basal shrinkage and active epithelial migration ensures efficient optic cup morphogenesis
Source: eLife. 2017 Apr 4;6:e22689. doi: 10.7554/eLife.22689 (PMC5380436; doi:10.7554/eLife.22689)
Supplement: Figure 2—source data 2. — DOI: http://dx.doi.org/10.7554/eLife.22689.011 [file elife-22689-fig2-data2.xlsx]

## Sheet: DMSO Control
Normalised intensity distribution - phalloidin :DMSO Control
Basal to apical position in RNE	section 1	section 2	section 3	section 4	section 5	section 6	section 7	section 8	section 9	section 10	section 11	section 12	section 13	section 14	section 15	section 16	section 17	section 18	section 19	section 20	section 21	section 22	section 23	section 24	section 25		Mean	SEM
1	0.790107	0.849173	0.836306	0.928794	0.708086	0.887221	0.455484	0.725737	0.855871	0.648054	0.466056	0.663818	0.896213	0.66073	0.76655	0.776586	0.686588	0.787888	0.799775	0.784061	0.731723	0.736525	0.886717	0.816534	0.755848		0.756018	0.0234738
2	0.777538	1	0.850213	0.927377	0.721249	0.880947	0.569985	0.775345	0.872634	0.691612	0.540319	0.786118	0.922108	0.802911	0.769462	0.803968	0.660252	0.767229	0.819663	0.808737	0.771324	0.779553	0.984718	0.971118	0.81789		0.802891	0.0227983
3	0.775832	0.883407	0.839135	0.886412	0.747834	0.876223	0.658853	0.780507	0.8753	0.71886	0.642699	0.862426	0.948444	0.848947	0.799956	0.806315	0.683525	0.720649	0.808898	0.825232	0.801671	0.770185	1	0.977289	0.833927		0.814901	0.0182227
4	0.795473	0.813538	0.83107	0.877573	0.773016	0.87763	0.671531	0.799334	0.90345	0.73883	0.694169	0.882312	0.942304	0.88211	0.812107	0.806839	0.733858	0.741558	0.825984	0.865709	0.844157	0.77378	0.967855	0.9303	0.843292		0.825111	0.0150961
5	0.806844	0.807275	0.851789	0.937567	0.804521	0.888484	0.684347	0.847564	0.943767	0.770314	0.711624	0.888201	0.928172	0.890919	0.827584	0.841015	0.786933	0.757302	0.850856	0.901498	0.888712	0.799635	0.954184	0.916616	0.857273		0.84572	0.0141785
6	0.838952	0.808806	0.882484	0.967389	0.864261	0.905276	0.715591	0.885225	0.97419	0.80844	0.734615	0.896966	0.943882	0.927164	0.847974	0.884945	0.83353	0.780974	0.868871	0.917728	0.918981	0.825175	0.947875	0.92167	0.880412		0.871255	0.0133905
7	0.876116	0.807515	0.920325	0.982348	0.882717	0.930684	0.772929	0.914005	0.994973	0.853446	0.76105	0.915032	0.961827	0.952121	0.847393	0.912205	0.889308	0.797006	0.89441	0.943648	0.933206	0.850493	0.957824	0.922376	0.902299		0.89501	0.0124844
8	0.899136	0.835732	0.939619	0.983913	0.878525	0.948388	0.82048	0.93835	1	0.882217	0.786981	0.940117	0.965448	0.959396	0.840193	0.940379	0.900309	0.827213	0.915782	0.97762	0.953382	0.879217	0.969483	0.930917	0.924586		0.913495	0.0113831
9	0.926985	0.874716	0.976243	1	0.881185	0.964864	0.872143	0.973342	0.994095	0.903054	0.810553	0.958422	0.973331	0.967345	0.83458	0.956632	0.912838	0.838663	0.949143	0.985793	0.963534	0.90677	0.980423	0.941064	0.942401		0.931525	0.0106822
10	0.941632	0.923682	0.991055	0.976556	0.894076	0.979365	0.89369	1	0.982942	0.950923	0.830851	0.973757	0.97248	0.976242	0.821921	0.968662	0.942258	0.840131	0.968461	0.982354	0.977373	0.92227	0.982807	0.9585	0.958825		0.944433	0.0101732
11	0.943446	0.936177	0.983858	0.963754	0.892431	0.983495	0.913482	0.994526	0.968613	0.981678	0.859159	0.988597	0.958533	0.98976	0.811037	0.985666	0.967923	0.84754	0.982419	0.987766	1	0.945137	0.97967	0.965491	0.967275		0.951897	0.00998321
12	0.96414	0.940504	0.985591	0.962277	0.927209	1	0.930048	0.965905	0.952936	1	0.870141	1	0.94482	1	0.809297	1	0.990308	0.843596	0.997325	1	0.980252	0.956167	0.963765	0.96753	0.97689		0.957148	0.0100142
13	0.995661	0.937008	0.969897	0.941935	0.959879	0.991951	0.940118	0.942599	0.961291	0.985699	0.902537	0.99408	0.911557	0.975419	0.803972	0.982582	1	0.845263	0.99703	0.999163	0.955367	0.97169	0.940682	0.988855	0.989495		0.955349	0.00964979
14	1	0.920122	0.972325	0.921075	1	0.997824	0.943287	0.92832	0.979577	0.949224	0.925749	0.975063	0.902278	0.959441	0.796513	0.969266	0.984662	0.838363	1	0.96975	0.942048	0.981294	0.919567	0.998143	1		0.950956	0.0101436
15	0.996353	0.924391	0.972033	0.928414	0.991956	0.941439	0.944353	0.9015	0.982058	0.913613	0.921024	0.944027	0.899402	0.957472	0.787561	0.964845	0.970139	0.848134	0.983118	0.953864	0.932619	0.995381	0.889984	1	0.996592		0.941611	0.0100989
16	0.984678	0.93682	0.957595	0.91858	0.990487	0.899107	0.980967	0.879705	0.988809	0.871446	0.938436	0.929812	0.923856	0.967089	0.794509	0.940101	0.967283	0.857287	0.966329	0.947456	0.924812	0.999907	0.8718	0.993272	0.983926		0.936563	0.0102419
17	0.978489	0.941465	0.915168	0.914069	0.945189	0.878262	1	0.861343	0.97332	0.864241	0.948934	0.912957	0.944162	0.972495	0.804485	0.920702	0.957054	0.847122	0.962586	0.940626	0.885944	1	0.84728	0.963613	0.980976		0.926419	0.0104914
18	0.963135	0.942681	0.876589	0.926505	0.936475	0.867554	0.995268	0.857111	0.972127	0.84141	0.969572	0.884085	0.925297	0.974221	0.812794	0.898208	0.949926	0.843163	0.96453	0.943542	0.869788	0.995347	0.819443	0.940322	0.975206		0.917772	0.0112179
19	0.949336	0.917358	0.813282	0.913348	0.931098	0.84276	0.976396	0.836384	0.970652	0.831527	1	0.859502	0.904119	0.983621	0.81681	0.876811	0.930005	0.851546	0.95459	0.941415	0.861146	0.98748	0.806697	0.9237	0.97552		0.906204	0.0123465
20	0.938452	0.893419	0.808806	0.8885	0.851108	0.83035	0.957331	0.816207	0.960356	0.802037	0.996057	0.859477	0.890856	0.97117	0.809496	0.863267	0.900078	0.863664	0.950268	0.932656	0.836808	0.977866	0.779456	0.900429	0.969934		0.889922	0.0127913
21	0.900392	0.857483	0.796405	0.853816	0.831329	0.813825	0.934256	0.773866	0.950988	0.779466	0.995137	0.870034	0.874641	0.979483	0.799212	0.859127	0.894604	0.866596	0.936934	0.906195	0.816688	0.971797	0.761301	0.879386	0.966877		0.874794	0.0137027
22	0.868825	0.82917	0.763099	0.852512	0.828952	0.793795	0.928295	0.754747	0.933267	0.764733	0.980808	0.878014	0.85064	0.952032	0.794162	0.854346	0.87208	0.855232	0.944226	0.894996	0.81137	0.961138	0.756825	0.865561	0.966942		0.862231	0.0139594
23	0.849095	0.793709	0.790955	0.84467	0.812595	0.787358	0.917905	0.757507	0.8905	0.758207	0.96692	0.876022	0.83216	0.933318	0.768901	0.85489	0.859108	0.844525	0.934673	0.885667	0.797795	0.940996	0.753402	0.858752	0.975037		0.851387	0.0134166
24	0.818904	0.734899	0.801048	0.835237	0.81781	0.76944	0.855357	0.758202	0.870251	0.742048	0.958413	0.860982	0.81411	0.93944	0.766407	0.866043	0.854974	0.83969	0.954454	0.882254	0.779574	0.928505	0.758494	0.866597	0.968251		0.841655	0.0139868
25	0.798084	0.6876	0.804085	0.830102	0.822767	0.752055	0.835787	0.71829	0.826936	0.728044	0.929111	0.851476	0.799908	0.918246	0.768225	0.880063	0.83351	0.825998	0.955525	0.895207	0.771404	0.925352	0.760039	0.863669	0.94157		0.828922	0.0145672
26	0.779698	0.676265	0.772021	0.806244	0.816302	0.720548	0.811133	0.698496	0.784629	0.746348	0.916607	0.842021	0.766105	0.90458	0.779102	0.860088	0.814667	0.806501	0.972724	0.892537	0.76881	0.924998	0.76275	0.843804	0.915095		0.815283	0.0149514
27	0.749581	0.67197	0.743545	0.799853	0.846706	0.704625	0.801953	0.709562	0.74079	0.774467	0.904831	0.82882	0.739836	0.881404	0.792289	0.829531	0.785605	0.782653	0.988526	0.871157	0.75812	0.920387	0.772559	0.834551	0.878116		0.804458	0.0149248
28	0.730851	0.64817	0.734702	0.793759	0.870695	0.704637	0.772942	0.724364	0.705991	0.779639	0.880785	0.815381	0.698272	0.850487	0.778112	0.822754	0.760316	0.756397	0.957469	0.850715	0.734808	0.912453	0.77158	0.824672	0.846944		0.789076	0.0147743
29	0.721775	0.634969	0.705894	0.779128	0.86339	0.713523	0.73345	0.727263	0.677548	0.782492	0.869702	0.794606	0.649782	0.818731	0.760832	0.816977	0.765695	0.754229	0.932697	0.8431	0.720682	0.893462	0.769415	0.79821	0.833187		0.77443	0.0148463
30	0.70235	0.629461	0.687237	0.766539	0.867229	0.712601	0.705093	0.724476	0.663595	0.760616	0.875078	0.77574	0.623867	0.803625	0.755848	0.815599	0.762583	0.769473	0.926796	0.829528	0.701286	0.873866	0.769673	0.770404	0.821957		0.763781	0.0154326
31	0.704434	0.633247	0.682461	0.767003	0.845896	0.707843	0.671243	0.696898	0.657048	0.724899	0.878638	0.762209	0.600813	0.760589	0.74971	0.804805	0.769835	0.774735	0.9039	0.809695	0.680912	0.850296	0.774034	0.738353	0.800361		0.749994	0.0151784
32	0.710353	0.638404	0.669913	0.758424	0.815184	0.702318	0.65896	0.687269	0.660033	0.697929	0.851141	0.759463	0.57391	0.725399	0.747881	0.798761	0.773831	0.775841	0.872222	0.785083	0.657275	0.82911	0.763103	0.716147	0.770529		0.735939	0.014343
33	0.704787	0.645166	0.65313	0.736124	0.810078	0.706	0.615823	0.691049	0.655316	0.685003	0.808214	0.760516	0.559203	0.735191	0.744787	0.805978	0.75766	0.764776	0.877919	0.788583	0.654179	0.797288	0.753726	0.711007	0.756828		0.727133	0.0143853
34	0.700101	0.651171	0.650867	0.698846	0.795411	0.709954	0.587642	0.680814	0.650047	0.676764	0.777465	0.757105	0.549588	0.723867	0.744721	0.79731	0.758105	0.76685	0.864886	0.786074	0.649759	0.757559	0.720911	0.70691	0.744863		0.716304	0.0140288
35	0.699107	0.643293	0.649046	0.668681	0.788387	0.697293	0.575355	0.662435	0.626041	0.660084	0.751289	0.750002	0.522538	0.712564	0.730412	0.796603	0.74049	0.770094	0.885352	0.784412	0.639301	0.739953	0.68354	0.688597	0.716959		0.703273	0.0152423
36	0.692992	0.640862	0.654957	0.660876	0.795885	0.682221	0.576179	0.65755	0.613884	0.649119	0.735812	0.738433	0.523018	0.68326	0.708121	0.793661	0.729968	0.751796	0.928954	0.760184	0.613034	0.726839	0.664631	0.670545	0.689975		0.69371	0.0161293
37	0.690974	0.638639	0.649454	0.649341	0.794222	0.66669	0.562611	0.647936	0.594759	0.652659	0.720164	0.727377	0.508767	0.675007	0.701647	0.786086	0.714213	0.748988	0.96684	0.743379	0.587303	0.7052	0.633196	0.648964	0.676412		0.683633	0.0177466
38	0.691307	0.642856	0.647021	0.660516	0.7911	0.648363	0.55435	0.628251	0.585416	0.647514	0.697687	0.725373	0.497111	0.667457	0.701922	0.805689	0.731555	0.766632	0.939677	0.742955	0.568329	0.69643	0.617398	0.639689	0.652091		0.677868	0.0181452
39	0.674721	0.636697	0.654108	0.659959	0.837401	0.643165	0.552861	0.606008	0.580137	0.645455	0.686625	0.700974	0.499665	0.648397	0.673375	0.814907	0.715925	0.758964	0.907342	0.740278	0.553787	0.685002	0.611054	0.62541	0.629708		0.669677	0.0182828
40	0.65547	0.634407	0.652516	0.666618	0.888074	0.647029	0.527211	0.591581	0.573479	0.629766	0.695755	0.675147	0.512052	0.618299	0.650724	0.82135	0.702126	0.732646	0.89211	0.725548	0.544802	0.676662	0.60469	0.621496	0.617536		0.662284	0.0191449
41	0.647464	0.643412	0.648565	0.65413	0.884457	0.632753	0.495123	0.555085	0.565852	0.641923	0.691597	0.662793	0.513487	0.615672	0.635104	0.832902	0.697251	0.708601	0.867431	0.705794	0.533683	0.669949	0.592866	0.617008	0.610814		0.652949	0.0194301
42	0.653858	0.638876	0.652543	0.628874	0.847256	0.619714	0.468174	0.543762	0.544568	0.652249	0.685728	0.659027	0.522547	0.610344	0.636718	0.834451	0.707745	0.711919	0.844869	0.709317	0.523972	0.660658	0.588464	0.616016	0.61978		0.647257	0.0191305
43	0.649756	0.626856	0.665005	0.619309	0.796639	0.604429	0.46276	0.54088	0.528565	0.638674	0.670355	0.658618	0.522661	0.569568	0.610817	0.808107	0.703791	0.706931	0.839163	0.713165	0.523466	0.65003	0.584255	0.619193	0.627659		0.637626	0.0182889
44	0.63824	0.623282	0.684165	0.606894	0.758352	0.59043	0.461184	0.533057	0.524235	0.645116	0.660148	0.646288	0.513928	0.553621	0.59905	0.783626	0.689029	0.680789	0.821187	0.701564	0.520586	0.635917	0.583016	0.615059	0.605429		0.626968	0.0172492
45	0.626821	0.623675	0.690503	0.587724	0.722432	0.582738	0.458154	0.524918	0.513554	0.669103	0.635568	0.62446	0.503213	0.537231	0.593115	0.790988	0.668343	0.664535	0.807804	0.683568	0.518844	0.6335	0.580543	0.616568	0.580723		0.617545	0.0170611
46	0.613765	0.613788	0.688658	0.590193	0.698205	0.594961	0.434996	0.524173	0.498349	0.667667	0.607782	0.620812	0.499022	0.539599	0.583861	0.797712	0.654294	0.660906	0.780263	0.670451	0.519629	0.628495	0.586687	0.615227	0.565228		0.610189	0.0168321
47	0.614858	0.601913	0.680936	0.59012	0.680565	0.597266	0.417135	0.515126	0.496262	0.664406	0.598858	0.605277	0.5016	0.544193	0.576075	0.787443	0.643399	0.666521	0.735348	0.667374	0.511594	0.621776	0.592144	0.598825	0.555255		0.602571	0.0161665
48	0.634029	0.597444	0.673377	0.582648	0.674165	0.597111	0.416366	0.509004	0.486965	0.646397	0.592161	0.593014	0.507025	0.554545	0.573515	0.782103	0.646528	0.68953	0.712772	0.646519	0.505078	0.610169	0.599512	0.590863	0.560849		0.599268	0.0157983
49	0.659222	0.599172	0.663928	0.586776	0.648307	0.586754	0.41528	0.503271	0.465416	0.611092	0.577885	0.593285	0.51821	0.545512	0.573029	0.780504	0.661778	0.702742	0.698449	0.625484	0.496787	0.600672	0.597192	0.579435	0.564748		0.594197	0.0159004
50	0.672731	0.595108	0.659444	0.570366	0.641638	0.591001	0.406187	0.499922	0.455586	0.586495	0.561346	0.590456	0.518055	0.542759	0.565934	0.780844	0.670829	0.708869	0.6869	0.635294	0.496128	0.599347	0.593267	0.572289	0.560579		0.590455	0.016439
51	0.688486	0.597007	0.670728	0.559079	0.636718	0.576798	0.404505	0.511072	0.448618	0.566313	0.560208	0.576531	0.526186	0.532809	0.544691	0.772947	0.671347	0.717616	0.676358	0.638323	0.497551	0.596326	0.591309	0.569919	0.558964		0.587616	0.0166938
52	0.709217	0.598225	0.684172	0.558837	0.634444	0.567108	0.406317	0.526641	0.448414	0.563637	0.559311	0.563626	0.534559	0.533176	0.535637	0.792218	0.677726	0.711183	0.668986	0.635753	0.48836	0.589554	0.586102	0.565341	0.551206		0.58759	0.0173171
53	0.711637	0.59828	0.687746	0.558725	0.641645	0.576581	0.407129	0.539943	0.449546	0.551087	0.559889	0.557896	0.533177	0.539519	0.512115	0.831749	0.688439	0.709904	0.670798	0.624335	0.488382	0.585411	0.582135	0.559024	0.541923		0.588281	0.0183955
54	0.73792	0.601609	0.703909	0.555986	0.654587	0.591077	0.413444	0.548315	0.449098	0.544176	0.561677	0.553272	0.533273	0.543169	0.49259	0.850467	0.704309	0.721399	0.683808	0.620777	0.489124	0.575306	0.57895	0.544239	0.5252		0.591107	0.0198718
55	0.759488	0.588324	0.722614	0.559723	0.660928	0.599816	0.425443	0.557956	0.445163	0.544233	0.559689	0.542872	0.527697	0.54994	0.463616	0.834619	0.69396	0.728646	0.705232	0.617164	0.489898	0.578034	0.580247	0.539245	0.525789		0.592013	0.0203666
56	0.772194	0.58815	0.736436	0.561551	0.651513	0.60404	0.430827	0.5685	0.440767	0.551218	0.57201	0.532829	0.537493	0.559804	0.440882	0.814162	0.681487	0.735646	0.709237	0.597793	0.477495	0.575191	0.578874	0.541597	0.529174		0.591555	0.0204774
57	0.77881	0.58327	0.749648	0.546097	0.647393	0.602364	0.440055	0.564741	0.429228	0.557013	0.585558	0.530801	0.545931	0.571544	0.431912	0.805236	0.672717	0.732487	0.734575	0.589257	0.466087	0.567532	0.577342	0.54649	0.532164		0.59153	0.0209358
58	0.781014	0.579895	0.770778	0.546308	0.66715	0.599565	0.436396	0.556789	0.425186	0.564235	0.582423	0.533571	0.56001	0.579754	0.432405	0.790314	0.665578	0.730781	0.764487	0.591572	0.456985	0.561832	0.582504	0.543962	0.526373		0.593195	0.0215789
59	0.798115	0.577678	0.792755	0.548506	0.635607	0.589515	0.441474	0.559695	0.424736	0.551207	0.573387	0.546062	0.576914	0.583843	0.430825	0.795671	0.639014	0.713869	0.80247	0.587198	0.452645	0.553724	0.589653	0.541347	0.512746		0.592746	0.0224147
60	0.798152	0.577788	0.811197	0.552314	0.610385	0.583411	0.460984	0.560848	0.418773	0.545844	0.576823	0.564491	0.579188	0.581262	0.429508	0.832248	0.639348	0.695936	0.814837	0.586319	0.460679	0.550872	0.600758	0.541912	0.514801		0.595547	0.0230325
61	0.810904	0.577236	0.822525	0.553415	0.611252	0.570954	0.454919	0.566034	0.417183	0.533377	0.596469	0.570337	0.562816	0.577477	0.428886	0.846103	0.62886	0.67725	0.841469	0.599762	0.467172	0.553771	0.603292	0.53647	0.523665		0.597264	0.0239765
62	0.827624	0.575172	0.822672	0.558905	0.620134	0.569102	0.458177	0.588237	0.412371	0.532287	0.610475	0.5792	0.557987	0.576424	0.441674	0.819857	0.616456	0.6697	0.840518	0.608288	0.474677	0.562913	0.601044	0.529628	0.527552		0.599243	0.0235119
63	0.836925	0.572995	0.826827	0.569161	0.591004	0.571571	0.45844	0.59266	0.416619	0.525473	0.610003	0.587959	0.549243	0.5791	0.455518	0.806449	0.61654	0.686874	0.851448	0.609486	0.467237	0.563628	0.595005	0.513585	0.532444		0.599448	0.0237458
64	0.835985	0.567076	0.842106	0.575783	0.591565	0.567906	0.457834	0.60356	0.4245	0.504058	0.613822	0.589933	0.533519	0.588508	0.448851	0.785779	0.604623	0.684692	0.858523	0.601113	0.473306	0.561478	0.594935	0.503236	0.530917		0.597744	0.0239829
65	0.830249	0.578283	0.855793	0.571054	0.604848	0.563276	0.458381	0.610401	0.41583	0.509624	0.628467	0.582824	0.536503	0.589105	0.419414	0.755715	0.588119	0.666706	0.843876	0.602825	0.467135	0.556282	0.580098	0.500254	0.522023		0.593483	0.0239616
66	0.810665	0.594607	0.909146	0.564994	0.601362	0.576145	0.466615	0.611224	0.414226	0.512517	0.655648	0.567874	0.529813	0.593185	0.413361	0.739489	0.578354	0.661956	0.860166	0.591857	0.467757	0.554056	0.574316	0.492746	0.511034		0.594125	0.0250375
67	0.813836	0.597791	0.932881	0.558402	0.587642	0.581972	0.469219	0.608823	0.412513	0.504888	0.654763	0.559574	0.520659	0.603101	0.407446	0.723872	0.564896	0.658391	0.874483	0.572793	0.466399	0.552032	0.574777	0.481348	0.499558		0.591282	0.0260532
68	0.818815	0.619675	0.931969	0.555457	0.574641	0.586584	0.478839	0.609565	0.418241	0.498941	0.642268	0.557582	0.51465	0.620974	0.394199	0.719334	0.563863	0.641373	0.884139	0.56326	0.464631	0.547832	0.573181	0.483825	0.501288		0.590605	0.0263029
69	0.814346	0.629967	0.914194	0.565543	0.564458	0.571381	0.474326	0.597515	0.424591	0.49071	0.644509	0.543242	0.513171	0.62459	0.392701	0.724463	0.559542	0.633126	0.89154	0.563898	0.466145	0.53632	0.574211	0.484765	0.503896		0.588126	0.0261347
70	0.807078	0.633965	0.883401	0.572611	0.540924	0.558547	0.474061	0.600992	0.430208	0.476928	0.637912	0.527848	0.504152	0.631647	0.399079	0.724505	0.536675	0.641596	0.913281	0.602337	0.467009	0.529289	0.577695	0.483186	0.502037		0.586279	0.0260915
71	0.789825	0.637669	0.873163	0.580338	0.514764	0.557134	0.477903	0.606819	0.438381	0.470092	0.648205	0.506094	0.500931	0.637379	0.403787	0.722406	0.535926	0.670818	0.908549	0.634945	0.472866	0.524772	0.578114	0.477809	0.495722		0.586576	0.0259645
72	0.779212	0.646451	0.850356	0.589083	0.518224	0.55184	0.498182	0.604809	0.452599	0.458678	0.643371	0.494509	0.489606	0.632723	0.406985	0.706641	0.54216	0.684821	0.908277	0.623746	0.45948	0.521152	0.580883	0.480348	0.486177		0.584413	0.0253879
73	0.752194	0.651357	0.813885	0.61254	0.527659	0.550079	0.507145	0.595403	0.462842	0.443309	0.637093	0.482351	0.484164	0.64269	0.406563	0.713598	0.54304	0.695839	0.932215	0.62421	0.459621	0.517617	0.585654	0.483281	0.475038		0.583975	0.025335
74	0.745996	0.649044	0.787342	0.642224	0.525252	0.545663	0.487121	0.586449	0.468467	0.438072	0.645046	0.479593	0.480238	0.63272	0.40955	0.71222	0.536369	0.691883	0.928252	0.636714	0.463211	0.514895	0.577342	0.474512	0.47033		0.58114	0.0251037
75	0.728047	0.658187	0.764951	0.648193	0.51377	0.548462	0.490295	0.591527	0.465197	0.424635	0.638234	0.465225	0.483193	0.615738	0.418813	0.693773	0.507647	0.695457	0.920709	0.660056	0.467556	0.511627	0.575864	0.471193	0.471439		0.577191	0.0246889
76	0.710063	0.671044	0.754679	0.646268	0.491191	0.549983	0.50047	0.577028	0.476551	0.419901	0.640322	0.450857	0.478675	0.607526	0.425436	0.685181	0.496067	0.697398	0.899349	0.679454	0.464942	0.507735	0.568054	0.460377	0.470137		0.573148	0.0243026
77	0.702723	0.692552	0.716988	0.651268	0.47647	0.526879	0.49845	0.552671	0.515645	0.419349	0.628829	0.440072	0.488939	0.586418	0.423902	0.679141	0.476853	0.6805	0.883114	0.678826	0.464184	0.510659	0.563274	0.462684	0.472711		0.567724	0.0234288
78	0.697334	0.708644	0.70848	0.6623	0.467722	0.518131	0.468711	0.53258	0.570482	0.421311	0.612427	0.43441	0.485724	0.582618	0.417885	0.66627	0.466466	0.690165	0.867079	0.662581	0.4621	0.516471	0.557482	0.46409	0.476948		0.564736	0.0233002
79	0.679953	0.715104	0.721425	0.66717	0.472794	0.517906	0.445219	0.518539	0.562701	0.443684	0.59636	0.425239	0.484143	0.577259	0.419133	0.661342	0.470533	0.700736	0.840049	0.633022	0.464391	0.521572	0.558697	0.470391	0.481088		0.561938	0.0225757
80	0.66864	0.705151	0.746613	0.667563	0.470853	0.515794	0.417103	0.507315	0.54513	0.482538	0.566651	0.429343	0.477558	0.56235	0.415365	0.656454	0.47415	0.698004	0.819482	0.623452	0.467545	0.527519	0.556316	0.483643	0.467153		0.558067	0.0221537
81	0.669963	0.693626	0.736631	0.658086	0.477075	0.517037	0.403233	0.489034	0.53559	0.509669	0.542953	0.446285	0.473925	0.555996	0.404622	0.638159	0.460393	0.711822	0.792342	0.604113	0.468768	0.53032	0.555801	0.488508	0.45896		0.552917	0.021421
82	0.671606	0.686071	0.720797	0.636354	0.487829	0.519327	0.401777	0.479307	0.526016	0.515155	0.51806	0.460431	0.489644	0.56691	0.400877	0.619585	0.451784	0.73049	0.775579	0.570833	0.472527	0.536092	0.549479	0.488965	0.450424		0.549037	0.0206923
83	0.663874	0.682398	0.711541	0.637026	0.516563	0.506288	0.411872	0.477358	0.504431	0.495201	0.493347	0.463421	0.497763	0.554906	0.398921	0.614085	0.443721	0.743711	0.759412	0.538124	0.469529	0.545505	0.549587	0.48112	0.445091		0.544192	0.0204628
84	0.655863	0.68988	0.694098	0.636338	0.5315	0.49227	0.414421	0.464165	0.468639	0.467766	0.452096	0.460065	0.503111	0.543083	0.428405	0.616519	0.452801	0.754832	0.732579	0.541553	0.47089	0.550892	0.544606	0.477214	0.449941		0.539741	0.0201951
85	0.641636	0.685582	0.680397	0.654276	0.549571	0.492583	0.414122	0.446909	0.444578	0.443303	0.43249	0.463411	0.509249	0.545896	0.465364	0.622314	0.462189	0.768735	0.718359	0.54926	0.474056	0.559074	0.546189	0.471413	0.450982		0.539678	0.0203306
86	0.633477	0.673938	0.663667	0.651464	0.657267	0.497915	0.413454	0.441358	0.408884	0.425985	0.423693	0.467805	0.534185	0.579825	0.471465	0.613154	0.476169	0.768579	0.702405	0.564231	0.476811	0.566662	0.547375	0.464669	0.449067		0.54294	0.0207377
87	0.623877	0.65832	0.672408	0.643711	0.781717	0.500047	0.412278	0.443315	0.396188	0.420641	0.410865	0.476302	0.575929	0.590097	0.479253	0.606584	0.491309	0.779841	0.664082	0.580665	0.478994	0.576508	0.560137	0.454638	0.454695		0.549296	0.0222636
88	0.629719	0.662717	0.671569	0.633137	0.86566	0.487546	0.40318	0.448719	0.387476	0.41286	0.413109	0.496994	0.59125	0.565909	0.48759	0.612717	0.508112	0.764711	0.627797	0.585018	0.469859	0.585757	0.585361	0.448408	0.462168		0.552294	0.0236167
89	0.627886	0.654465	0.665976	0.629866	0.897035	0.48893	0.404262	0.451289	0.383201	0.410226	0.403817	0.513625	0.618144	0.553111	0.505785	0.618275	0.511108	0.768406	0.621638	0.543647	0.456054	0.589261	0.603136	0.443045	0.458572		0.55283	0.0245102
90	0.629193	0.633368	0.658387	0.630892	0.84795	0.496177	0.402974	0.461571	0.377074	0.452528	0.389602	0.526604	0.692684	0.540913	0.497854	0.637425	0.529464	0.766026	0.613377	0.536949	0.447113	0.59032	0.655808	0.435569	0.449356		0.555967	0.024018
91	0.612174	0.60848	0.673958	0.639258	0.802134	0.507227	0.389339	0.487647	0.372001	0.480666	0.369584	0.542746	0.754142	0.531607	0.453638	0.639933	0.550479	0.746946	0.594343	0.51986	0.437979	0.588561	0.715374	0.437586	0.408725		0.554575	0.0248098
92	0.612131	0.601808	0.68471	0.672785	0.755325	0.513981	0.373517	0.51012	0.373415	0.48497	0.370584	0.572332	0.804143	0.54524	0.422461	0.631293	0.55818	0.749337	0.594715	0.498199	0.434024	0.590666	0.751339	0.435308	0.369018		0.556384	0.026349
93	0.61996	0.625282	0.682429	0.679676	0.692307	0.524504	0.36919	0.510941	0.382024	0.460769	0.373778	0.593658	0.942193	0.562336	0.412031	0.625149	0.581966	0.760967	0.592256	0.486969	0.433866	0.597863	0.795273	0.433911	0.351525		0.563633	0.0295316
94	0.603687	0.665568	0.693551	0.658201	0.630158	0.528848	0.369279	0.494577	0.402226	0.442637	0.380401	0.606391	1	0.563067	0.427066	0.628103	0.654015	0.765612	0.599819	0.460263	0.425282	0.612043	0.817322	0.430986	0.346701		0.568232	0.0312581
95	0.586167	0.715909	0.708072	0.643802	0.584479	0.539462	0.37594	0.476732	0.430463	0.43519	0.385456	0.617986	0.898268	0.558198	0.457615	0.655148	0.702669	0.781044	0.601854	0.436324	0.417087	0.62773	0.823819	0.438078	0.338937		0.569457	0.0299526
96	0.585199	0.813425	0.743759	0.635028	0.569415	0.544329	0.3797	0.473222	0.466075	0.434223	0.416394	0.621871	0.818815	0.633173	0.535617	0.681403	0.68524	0.831222	0.583988	0.426548	0.410415	0.671802	0.814452	0.443705	0.346101		0.582605	0.0298649
97	0.594901	0.825463	0.832172	0.627036	0.568703	0.536157	0.380363	0.479888	0.479858	0.463625	0.494367	0.657346	0.749822	0.86397	0.713471	0.745568	0.665347	0.966005	0.572081	0.406556	0.418484	0.690415	0.803006	0.471514	0.36438		0.61482	0.0334711
98	0.593532	0.811026	0.874819	0.620327	0.594139	0.552173	0.395307	0.509486	0.471162	0.47447	0.57444	0.736207	0.721192	0.890053	0.970043	0.751023	0.676531	1	0.591762	0.396911	0.440638	0.700646	0.764416	0.516227	0.353889		0.639217	0.0360997
99	0.627427	0.772748	0.901933	0.611553	0.602499	0.592653	0.436863	0.535098	0.455775	0.479876	0.563242	0.780891	0.7245	0.83399	1	0.776078	0.70295	0.919477	0.691313	0.419889	0.462827	0.706256	0.714465	0.553362	0.340808		0.648259	0.0339391
100	0.7467	0.713894	1	0.6003	0.576521	0.64886	0.496452	0.553428	0.46084	0.529282	0.556687	0.878201	0.759835	0.801374	0.841189	0.784909	0.739911	0.837587	0.870003	0.457885	0.505312	0.721765	0.688795	0.574646	0.305962		0.666014	0.0329489

## Sheet: Rockout treated
Figure 2 - source data 2
Normalised intensity distribution - phalloidin :Rockout treated
Basal to apical position in RNE	section 1	section 2	section 3	section 4	section 5	section 6	section 7	section 8	section 9	section 10	section 11	section 12	section 13	section 14	section 15	section 16	section 17	section 18	section 19	section 20	section 21	section 22	section 23	section 24	section 25		Mean	SEM
1	0.629569	1	0.989025	0.855743	0.510135	0.995189	0.870878	1	1	0.659396	0.85359	0.851265	0.774729	0.879698	0.831117	0.835982	0.896308	0.980721	0.885738	0.912572	1	0.840681	0.778282	0.958215	0.842184		0.865241	0.024968
2	0.636545	0.812916	1	1	0.508392	1	0.964448	0.981788	0.931626	0.817605	0.955556	0.883347	1	1	0.988342	1	1	1	1	1	0.97531	0.792701	0.809975	0.959214	0.795476		0.91253	0.0256887
3	0.594128	0.722225	0.962943	0.908619	0.507486	0.967328	1	0.863449	0.696931	0.848762	0.998013	0.951706	0.918457	0.953625	1	0.868484	0.91284	0.888305	0.872305	0.988863	0.836953	0.692429	0.813851	0.935451	0.66547		0.854745	0.0270183
4	0.613448	0.689935	0.91648	0.768985	0.504837	0.95282	0.969914	0.737634	0.6231	0.89107	0.992624	1	0.734904	0.737769	0.855111	0.763483	0.729826	0.778483	0.77415	0.884086	0.749108	0.61298	0.793244	0.907899	0.577812		0.782388	0.0270138
5	0.719087	0.672412	0.832903	0.669176	0.503051	0.962865	0.935414	0.670542	0.607809	0.884985	0.990832	0.927087	0.629238	0.650632	0.749548	0.70548	0.632487	0.697814	0.685336	0.774731	0.725037	0.582327	0.748756	0.89507	0.553537		0.736246	0.0266641
6	0.690272	0.657184	0.754519	0.63447	0.502174	0.93298	0.858224	0.638618	0.584393	0.962901	1	0.854467	0.587215	0.607881	0.72845	0.677104	0.57545	0.62342	0.645948	0.718817	0.703377	0.543051	0.728905	0.859082	0.537784		0.704268	0.0274345
7	0.631161	0.644833	0.705351	0.624436	0.503478	0.897103	0.745008	0.609594	0.545228	0.937554	0.983251	0.777098	0.545848	0.573976	0.694214	0.675975	0.53859	0.595325	0.612024	0.670964	0.687683	0.528245	0.70948	0.796521	0.50422		0.669486	0.0260676
8	0.626249	0.628302	0.659189	0.603581	0.503559	0.897683	0.683445	0.593104	0.5564	0.954186	0.93768	0.713675	0.513921	0.55712	0.638135	0.666852	0.525392	0.590911	0.588779	0.640057	0.647509	0.508067	0.679385	0.764336	0.470641		0.645926	0.0256516
9	0.584063	0.617911	0.632802	0.57489	0.500351	0.901716	0.643633	0.57842	0.621439	1	0.906048	0.698816	0.470655	0.543105	0.615078	0.650311	0.518275	0.584258	0.579772	0.627486	0.613414	0.482582	0.665264	0.750927	0.43604		0.63189	0.0271656
10	0.539007	0.614798	0.594528	0.551614	0.495645	0.927473	0.598893	0.571041	0.709275	0.992892	0.874621	0.689354	0.46049	0.527992	0.599089	0.634884	0.508898	0.576218	0.575032	0.623925	0.560136	0.455832	0.630888	0.746306	0.42895		0.619511	0.028148
11	0.533513	0.619369	0.572686	0.536939	0.492006	0.960323	0.584251	0.576847	0.840469	0.934011	0.860155	0.698581	0.456935	0.521065	0.571072	0.619255	0.498697	0.560037	0.558933	0.619944	0.541943	0.429997	0.606826	0.741471	0.430939		0.614651	0.0293253
12	0.524011	0.609178	0.574696	0.520746	0.490746	0.956907	0.584119	0.585085	0.823612	0.908291	0.843976	0.68407	0.44831	0.505224	0.54518	0.608568	0.491895	0.562619	0.545057	0.592829	0.51346	0.419583	0.598026	0.726494	0.417953		0.603225	0.0289931
13	0.52344	0.583595	0.572618	0.508256	0.492821	0.955288	0.579311	0.599675	0.699454	0.839219	0.826876	0.677559	0.442773	0.497812	0.536211	0.600302	0.490772	0.561474	0.531803	0.582506	0.499506	0.404302	0.574702	0.70736	0.406871		0.58778	0.0267638
14	0.535354	0.556081	0.562116	0.501295	0.497315	0.911582	0.576277	0.587337	0.641134	0.753967	0.793877	0.668404	0.421026	0.496209	0.524179	0.595235	0.496848	0.55539	0.511989	0.575165	0.476812	0.390706	0.542859	0.683025	0.403031		0.570288	0.0241086
15	0.539228	0.538278	0.550511	0.503592	0.502466	0.838558	0.573325	0.544635	0.625966	0.709665	0.7712	0.648196	0.410112	0.488227	0.500546	0.59029	0.508785	0.551124	0.496353	0.590675	0.466136	0.376648	0.535697	0.683187	0.417312		0.558428	0.0217135
16	0.535102	0.523957	0.534045	0.509847	0.507475	0.797631	0.567163	0.514342	0.616009	0.693441	0.7612	0.62828	0.398185	0.486727	0.481088	0.578233	0.501032	0.546542	0.492647	0.583723	0.459829	0.362851	0.533393	0.684606	0.427058		0.548976	0.0207846
17	0.512346	0.509712	0.525417	0.502861	0.511037	0.768346	0.570509	0.491564	0.595	0.715599	0.744107	0.581776	0.389061	0.486476	0.463952	0.571975	0.492327	0.534373	0.504299	0.572952	0.448103	0.355245	0.537005	0.677265	0.434598		0.539836	0.0202671
18	0.536499	0.50735	0.519575	0.499433	0.515571	0.727808	0.559724	0.463016	0.574055	0.724719	0.735923	0.559495	0.368451	0.485907	0.4659	0.563639	0.48968	0.528064	0.495999	0.553854	0.439287	0.346293	0.547236	0.67684	0.441264		0.533023	0.0198978
19	0.581549	0.507061	0.525301	0.4994	0.520664	0.700572	0.565264	0.451991	0.578326	0.692164	0.728611	0.552255	0.350752	0.486972	0.440846	0.549247	0.483242	0.517643	0.502362	0.551151	0.427091	0.340759	0.55741	0.677685	0.435299		0.528945	0.0197054
20	0.630307	0.506741	0.511682	0.499641	0.523207	0.66894	0.568342	0.448584	0.607502	0.686752	0.717042	0.555647	0.331165	0.483273	0.425392	0.537277	0.472531	0.510937	0.49854	0.54529	0.423002	0.330803	0.54227	0.679563	0.432899		0.525493	0.0202362
21	0.778608	0.524535	0.499166	0.484536	0.524295	0.654179	0.573519	0.433918	0.567125	0.68964	0.69996	0.546664	0.324591	0.475609	0.413843	0.52797	0.4648	0.501637	0.494218	0.536654	0.417014	0.326603	0.530895	0.674948	0.441957		0.524276	0.0221573
22	0.82376	0.539649	0.50263	0.470288	0.525782	0.655446	0.57673	0.430073	0.53467	0.680774	0.683791	0.532255	0.31687	0.470453	0.403368	0.535661	0.462295	0.505361	0.498757	0.520547	0.414271	0.325309	0.515925	0.669734	0.43794		0.521294	0.0230191
23	0.769081	0.554523	0.494619	0.481361	0.525936	0.662675	0.574604	0.422959	0.511745	0.667935	0.658409	0.53177	0.319733	0.473791	0.400962	0.53626	0.462726	0.507055	0.480225	0.517354	0.411315	0.321632	0.508444	0.667447	0.434514		0.515883	0.0216426
24	0.650902	0.564958	0.490162	0.480236	0.524058	0.676579	0.563441	0.420503	0.524119	0.641023	0.641861	0.534599	0.312662	0.476362	0.398773	0.536734	0.468214	0.50667	0.46764	0.497487	0.411482	0.316592	0.504736	0.668338	0.428912		0.508282	0.0197444
25	0.605414	0.566015	0.495674	0.474229	0.522761	0.670571	0.556537	0.413628	0.531232	0.648021	0.621953	0.536348	0.310646	0.480383	0.401826	0.523259	0.475181	0.509085	0.454523	0.476394	0.411727	0.305383	0.492962	0.661134	0.429405		0.502972	0.0192219
26	0.584832	0.557217	0.492011	0.46292	0.524646	0.655434	0.548369	0.407413	0.533843	0.633283	0.604942	0.528396	0.30612	0.444261	0.379872	0.513027	0.474605	0.490167	0.427162	0.461698	0.402848	0.300738	0.479639	0.640242	0.429357		0.491322	0.0188618
27	0.539884	0.547972	0.497544	0.458659	0.528468	0.657856	0.548602	0.400862	0.543916	0.629041	0.598483	0.530659	0.301793	0.423856	0.366279	0.499277	0.464176	0.472693	0.401763	0.448792	0.395533	0.294179	0.473482	0.630714	0.422575		0.483082	0.019145
28	0.530527	0.55205	0.513323	0.469829	0.530517	0.637402	0.549866	0.391458	0.555492	0.639541	0.591337	0.530293	0.293316	0.395367	0.371549	0.488363	0.460482	0.462524	0.388025	0.441615	0.387492	0.290406	0.464639	0.613029	0.422374		0.478833	0.0193766
29	0.528061	0.546226	0.513266	0.467052	0.532516	0.609103	0.540364	0.387948	0.56466	0.630259	0.58326	0.529384	0.285609	0.365409	0.367993	0.476219	0.453468	0.453024	0.366968	0.44499	0.380622	0.288463	0.464203	0.607352	0.426403		0.472513	0.0193982
30	0.520092	0.555969	0.513261	0.461707	0.535698	0.579516	0.528397	0.389012	0.560238	0.605672	0.569538	0.522424	0.279777	0.34633	0.377284	0.473459	0.448684	0.442985	0.354116	0.439339	0.369752	0.28619	0.466033	0.601503	0.42984		0.466273	0.0189462
31	0.528612	0.57158	0.50642	0.449509	0.539658	0.577214	0.511856	0.3921	0.56563	0.600422	0.555937	0.521155	0.268991	0.339224	0.375634	0.475344	0.443192	0.437335	0.347473	0.441729	0.365138	0.2887	0.462293	0.600654	0.430218		0.463841	0.0192134
32	0.514337	0.573038	0.493313	0.428769	0.550136	0.564085	0.509936	0.390946	0.549008	0.586428	0.550374	0.506004	0.265369	0.323665	0.408373	0.472807	0.431811	0.431821	0.351143	0.434457	0.360056	0.293966	0.466016	0.604848	0.429727		0.459617	0.0187572
33	0.533021	0.560636	0.49036	0.412511	0.558897	0.544981	0.506702	0.393381	0.542369	0.576564	0.537201	0.482645	0.262775	0.314129	0.404083	0.457102	0.423105	0.430782	0.349811	0.434145	0.357035	0.292949	0.470664	0.606676	0.428104		0.454825	0.0186155
34	0.584971	0.544186	0.477407	0.407435	0.566438	0.535711	0.499746	0.396304	0.536993	0.577609	0.5186	0.47287	0.258282	0.301936	0.394659	0.441758	0.416564	0.422065	0.352372	0.427776	0.346475	0.295129	0.471303	0.609768	0.424889		0.45125	0.0191486
35	0.609975	0.546492	0.47072	0.406361	0.571849	0.535073	0.486492	0.395675	0.525505	0.586049	0.493026	0.454902	0.256658	0.28506	0.389833	0.438392	0.412881	0.418382	0.353322	0.420012	0.341519	0.299659	0.479803	0.628603	0.421726		0.449119	0.0199412
36	0.581742	0.551114	0.476963	0.398659	0.576514	0.537027	0.464073	0.397004	0.525857	0.605098	0.485207	0.441759	0.262868	0.274018	0.38201	0.428409	0.405543	0.411301	0.360489	0.401451	0.333625	0.300721	0.486927	0.643603	0.42066		0.446106	0.0203601
37	0.520708	0.549041	0.469724	0.389431	0.582298	0.536667	0.450107	0.395347	0.519945	0.606375	0.484488	0.404276	0.267172	0.268186	0.385391	0.425178	0.393397	0.408125	0.346789	0.387831	0.329922	0.310352	0.492481	0.654804	0.417491		0.439821	0.020264
38	0.499121	0.54623	0.474137	0.385182	0.590025	0.527335	0.452269	0.400506	0.516232	0.616319	0.486337	0.381376	0.275304	0.26296	0.382646	0.419606	0.380664	0.402853	0.346502	0.382155	0.327124	0.31258	0.496818	0.656502	0.424927		0.437828	0.0204788
39	0.491239	0.528633	0.464738	0.384466	0.598954	0.515791	0.450922	0.411363	0.520781	0.627764	0.480862	0.364	0.279813	0.258442	0.35973	0.416177	0.364867	0.393463	0.355708	0.365156	0.325133	0.311161	0.499317	0.658956	0.433138		0.434423	0.0208977
40	0.491132	0.527166	0.457801	0.379848	0.604978	0.516371	0.436233	0.428183	0.529149	0.621039	0.482403	0.346544	0.28037	0.253902	0.347448	0.408581	0.353471	0.390126	0.362158	0.375325	0.325267	0.311385	0.502893	0.652834	0.434809		0.432777	0.0210623
41	0.498544	0.518981	0.461091	0.370956	0.606947	0.508256	0.429477	0.432571	0.544194	0.614645	0.48838	0.338652	0.286619	0.251455	0.338049	0.397803	0.349315	0.394025	0.35213	0.391174	0.327232	0.310026	0.500526	0.641827	0.436515		0.431576	0.0210349
42	0.498173	0.511791	0.467515	0.370194	0.607576	0.501168	0.429144	0.430977	0.541225	0.636609	0.490405	0.336582	0.276955	0.243862	0.338299	0.392558	0.346312	0.394737	0.344342	0.415639	0.329654	0.310533	0.504343	0.642078	0.44417		0.432194	0.021562
43	0.505189	0.518381	0.460091	0.359453	0.606133	0.50099	0.425372	0.423229	0.528054	0.646921	0.493635	0.33156	0.271626	0.23823	0.328256	0.385275	0.338072	0.407015	0.338444	0.417845	0.326925	0.312127	0.501137	0.6552	0.451203		0.430814	0.0222984
44	0.523629	0.520002	0.454948	0.347846	0.601094	0.502517	0.419624	0.432621	0.527608	0.642524	0.49958	0.326968	0.264521	0.2314	0.333873	0.380731	0.327956	0.408732	0.345638	0.409099	0.326465	0.314465	0.485113	0.667286	0.456078		0.430013	0.0227317
45	0.521059	0.510095	0.444802	0.348373	0.595728	0.510794	0.410901	0.436479	0.532677	0.633375	0.498203	0.322018	0.266348	0.225394	0.336023	0.377222	0.322699	0.403983	0.356703	0.414289	0.325321	0.314641	0.480389	0.679679	0.462666		0.429194	0.0228208
46	0.529189	0.499554	0.444642	0.354209	0.592692	0.50236	0.408325	0.429399	0.532712	0.62218	0.501549	0.311194	0.264856	0.228043	0.331942	0.373953	0.322426	0.395458	0.358562	0.421001	0.321201	0.31649	0.477547	0.683743	0.471748		0.427799	0.0227772
47	0.535065	0.501167	0.442056	0.350006	0.591592	0.49723	0.40256	0.425064	0.546817	0.650548	0.505965	0.310468	0.265118	0.233518	0.323844	0.377271	0.317657	0.388927	0.35583	0.431846	0.318786	0.313918	0.47982	0.697168	0.470022		0.429291	0.0237118
48	0.537183	0.492704	0.443201	0.346179	0.591716	0.487865	0.401595	0.415856	0.549583	0.68346	0.505919	0.309705	0.259407	0.237512	0.31953	0.378201	0.315298	0.380546	0.346115	0.429703	0.322745	0.312919	0.48309	0.702243	0.46647		0.42875	0.0244615
49	0.547658	0.49334	0.438639	0.34919	0.589064	0.486602	0.401143	0.410183	0.547373	0.686712	0.494782	0.308767	0.25953	0.235744	0.321822	0.380424	0.312074	0.39273	0.346604	0.424488	0.326743	0.315896	0.488723	0.703776	0.471262		0.429331	0.0244872
50	0.532744	0.487526	0.441162	0.354446	0.581976	0.492096	0.399108	0.413379	0.529462	0.692882	0.487293	0.314503	0.262278	0.237188	0.321201	0.388533	0.306682	0.402027	0.344205	0.430623	0.33422	0.317249	0.48895	0.703661	0.465459		0.429154	0.0240558
51	0.530942	0.483614	0.441503	0.349731	0.574808	0.492104	0.399423	0.410844	0.506392	0.709808	0.478132	0.33394	0.264342	0.23724	0.309966	0.400883	0.30209	0.416409	0.337521	0.442531	0.338448	0.31968	0.490643	0.686424	0.459053		0.428659	0.0237112
52	0.526367	0.471161	0.440388	0.339878	0.571279	0.487993	0.396847	0.414409	0.490652	0.69985	0.480119	0.351348	0.261666	0.240914	0.30565	0.405441	0.310522	0.430869	0.329248	0.450068	0.343241	0.316256	0.496972	0.670826	0.449922		0.427275	0.0229933
53	0.532509	0.460898	0.440636	0.339683	0.571922	0.492258	0.392393	0.414713	0.495072	0.686925	0.482459	0.377611	0.258931	0.245188	0.311874	0.414623	0.311794	0.428495	0.318311	0.455712	0.34449	0.31264	0.4966	0.664312	0.435961		0.42744	0.0225889
54	0.53864	0.46075	0.443362	0.334601	0.574538	0.493744	0.397462	0.417772	0.505058	0.666816	0.485781	0.398346	0.250912	0.249248	0.319268	0.428043	0.305024	0.427311	0.300627	0.454925	0.347538	0.309053	0.493355	0.652717	0.433003		0.427516	0.0223201
55	0.535837	0.468369	0.43997	0.335161	0.578429	0.49292	0.394733	0.420243	0.515305	0.662288	0.482349	0.413149	0.24624	0.251614	0.320189	0.428806	0.292271	0.428018	0.296387	0.465532	0.357361	0.305126	0.492597	0.653123	0.439598		0.428625	0.0224985
56	0.527956	0.473701	0.444918	0.338308	0.5848	0.497155	0.391943	0.429761	0.523114	0.678247	0.484194	0.421449	0.242348	0.255743	0.32016	0.431081	0.287924	0.416271	0.296791	0.469448	0.371115	0.301628	0.493292	0.655846	0.439714		0.431076	0.0229386
57	0.527778	0.471907	0.450477	0.343073	0.594939	0.498998	0.392075	0.442256	0.505894	0.675392	0.492689	0.431617	0.238656	0.276311	0.321529	0.437563	0.290267	0.407598	0.291289	0.470016	0.382039	0.305462	0.493305	0.652609	0.447622		0.433654	0.0226212
58	0.539321	0.477772	0.455024	0.347282	0.606509	0.49588	0.396538	0.453887	0.497466	0.655401	0.497049	0.45019	0.238005	0.289001	0.313528	0.433319	0.296432	0.410423	0.285916	0.463732	0.386004	0.314347	0.502222	0.650183	0.452437		0.436315	0.0222899
59	0.543993	0.482277	0.443517	0.342779	0.62185	0.503524	0.410648	0.458597	0.501443	0.649334	0.496231	0.447906	0.237584	0.286671	0.315769	0.428914	0.30033	0.414343	0.27601	0.45106	0.392621	0.318377	0.513997	0.659326	0.452817		0.437997	0.0226972
60	0.556187	0.497046	0.433394	0.34377	0.633566	0.51794	0.417263	0.47084	0.490878	0.645107	0.497544	0.443733	0.237699	0.294487	0.326767	0.425136	0.30142	0.417302	0.265872	0.432187	0.396274	0.326439	0.519822	0.670852	0.455427		0.440678	0.0230576
61	0.571906	0.511985	0.426657	0.350506	0.647917	0.533458	0.423199	0.481763	0.494455	0.648193	0.491567	0.446557	0.240743	0.2961	0.333408	0.423384	0.306746	0.410961	0.26052	0.423311	0.404231	0.324855	0.530045	0.676565	0.457391		0.444657	0.0236389
62	0.595759	0.517407	0.418902	0.362484	0.661877	0.539835	0.434783	0.483978	0.507448	0.620796	0.492757	0.451813	0.243125	0.285531	0.330804	0.412452	0.31716	0.403456	0.25909	0.411799	0.409579	0.32729	0.532348	0.674227	0.45556		0.44601	0.023792
63	0.601514	0.523733	0.412324	0.359119	0.673093	0.549109	0.436989	0.487553	0.50573	0.607898	0.488568	0.451227	0.248832	0.270163	0.331294	0.402364	0.326738	0.402768	0.25167	0.406242	0.421769	0.333674	0.536053	0.680863	0.457618		0.446676	0.0242015
64	0.596045	0.538504	0.418927	0.353399	0.680995	0.55031	0.439414	0.481113	0.507652	0.597185	0.472997	0.445237	0.252846	0.263718	0.333132	0.402876	0.345699	0.416432	0.250803	0.394621	0.435217	0.335009	0.542193	0.691766	0.466593		0.448507	0.0243006
65	0.609336	0.553392	0.410303	0.351914	0.689011	0.54742	0.440405	0.477802	0.507842	0.594654	0.472445	0.426307	0.257886	0.255315	0.333047	0.404667	0.35709	0.418979	0.256708	0.393176	0.451864	0.346105	0.553331	0.701795	0.476119		0.451477	0.0247091
66	0.619985	0.557644	0.413333	0.357748	0.700987	0.544811	0.443907	0.469231	0.540996	0.587811	0.484757	0.410984	0.256569	0.25398	0.327396	0.408264	0.363837	0.41828	0.260786	0.398756	0.457192	0.357454	0.554068	0.725019	0.473563		0.455494	0.0253996
67	0.65379	0.556242	0.411402	0.361079	0.719123	0.551817	0.448185	0.469766	0.54653	0.600551	0.488235	0.392848	0.260163	0.249583	0.323706	0.404301	0.364121	0.417446	0.261981	0.386086	0.450409	0.366894	0.555801	0.753606	0.4751		0.458751	0.0268707
68	0.66904	0.555562	0.417785	0.368049	0.738968	0.558537	0.457622	0.470793	0.549783	0.598042	0.492417	0.380971	0.263079	0.245114	0.320244	0.394405	0.356518	0.398057	0.256416	0.372028	0.444737	0.377577	0.556445	0.734548	0.488452		0.458608	0.0273898
69	0.643013	0.574131	0.429073	0.372602	0.755679	0.564569	0.47429	0.469999	0.567771	0.574515	0.493667	0.3701	0.268693	0.249785	0.326056	0.392837	0.346128	0.384329	0.24796	0.357244	0.442519	0.379741	0.555116	0.709383	0.501253		0.458018	0.0272264
70	0.656385	0.596386	0.437155	0.378929	0.773475	0.56791	0.481164	0.469202	0.602815	0.563559	0.495214	0.357004	0.269624	0.248262	0.308002	0.386404	0.34005	0.374417	0.243552	0.348831	0.446315	0.379433	0.564597	0.693825	0.508154		0.459627	0.0283667
71	0.658023	0.612743	0.45021	0.39116	0.796127	0.567219	0.482893	0.483435	0.611647	0.571888	0.495126	0.350622	0.273743	0.257429	0.306602	0.386202	0.341145	0.370129	0.23847	0.346993	0.448477	0.374661	0.579434	0.699381	0.509536		0.464132	0.0291949
72	0.663082	0.595983	0.454729	0.413023	0.82215	0.57131	0.489708	0.491047	0.593155	0.574405	0.509531	0.347387	0.286547	0.266845	0.308514	0.388809	0.34615	0.369538	0.241427	0.340089	0.455286	0.372903	0.585404	0.6991	0.510903		0.467881	0.0292564
73	0.675462	0.577667	0.466588	0.424247	0.849018	0.571181	0.491243	0.498101	0.579056	0.581881	0.539234	0.340748	0.28812	0.266156	0.305833	0.401207	0.346666	0.372517	0.248915	0.343349	0.458188	0.372992	0.603873	0.688806	0.516423		0.472299	0.0297286
74	0.698178	0.569012	0.463173	0.43001	0.876583	0.575359	0.4947	0.481055	0.602136	0.589301	0.548029	0.336189	0.285054	0.274328	0.314218	0.410246	0.347623	0.369201	0.257575	0.343519	0.465727	0.37286	0.606998	0.685372	0.51488		0.476453	0.03051
75	0.699937	0.576713	0.458259	0.43434	0.901386	0.580315	0.493627	0.476133	0.600027	0.599962	0.539216	0.333863	0.277314	0.28128	0.319379	0.425185	0.34772	0.367547	0.271007	0.344751	0.46507	0.376727	0.605322	0.669058	0.524329		0.478739	0.0307551
76	0.70162	0.573222	0.466465	0.441962	0.915635	0.586985	0.495644	0.476602	0.60381	0.608924	0.529102	0.341755	0.267671	0.292364	0.323014	0.438347	0.350477	0.375178	0.281264	0.353067	0.461737	0.379939	0.608267	0.662265	0.537161		0.482899	0.0307546
77	0.718208	0.568806	0.474625	0.44878	0.916124	0.601857	0.496559	0.474649	0.588965	0.635431	0.535268	0.353892	0.265484	0.300597	0.325439	0.451543	0.350079	0.39188	0.284249	0.363579	0.458287	0.390116	0.630607	0.660018	0.555301		0.489614	0.0308868
78	0.750946	0.58331	0.48016	0.453241	0.909815	0.611397	0.497064	0.468581	0.588948	0.669101	0.546981	0.368471	0.264929	0.301173	0.320185	0.464559	0.347999	0.399318	0.291635	0.380163	0.455204	0.397422	0.638484	0.661587	0.570086		0.49683	0.0314043
79	0.772624	0.598467	0.48499	0.444649	0.90459	0.628952	0.502495	0.479097	0.601742	0.671463	0.551631	0.376033	0.264167	0.286112	0.313307	0.480021	0.345523	0.396473	0.287178	0.382671	0.454489	0.403927	0.641433	0.658639	0.591408		0.500883	0.0321695
80	0.787968	0.608163	0.484695	0.437447	0.907557	0.648093	0.503212	0.490261	0.626308	0.663343	0.543529	0.393158	0.254682	0.288858	0.312832	0.502901	0.349787	0.398571	0.287315	0.383203	0.453784	0.414503	0.647378	0.65835	0.60127		0.505887	0.0326603
81	0.784987	0.61642	0.499422	0.433127	0.916358	0.672774	0.50213	0.501904	0.613162	0.672596	0.550002	0.402206	0.24771	0.283183	0.312295	0.51378	0.359748	0.394386	0.287118	0.389932	0.456127	0.419849	0.642089	0.656073	0.613804		0.509647	0.0330398
82	0.766332	0.627823	0.510915	0.433593	0.924673	0.701744	0.506984	0.51624	0.627239	0.624604	0.551546	0.409593	0.242642	0.27417	0.314144	0.518871	0.370717	0.385554	0.285442	0.398248	0.454721	0.432098	0.637147	0.652862	0.613409		0.511252	0.0329791
83	0.756432	0.659999	0.522229	0.432724	0.930453	0.726164	0.505394	0.534861	0.661177	0.609528	0.551199	0.43531	0.24117	0.276058	0.319065	0.533047	0.375144	0.385061	0.285232	0.410377	0.450976	0.440126	0.625886	0.636421	0.614199		0.516729	0.0331477
84	0.756489	0.672476	0.5349	0.437793	0.935652	0.757254	0.510948	0.5475	0.679666	0.570902	0.556603	0.474154	0.239336	0.27312	0.299542	0.557754	0.382842	0.384527	0.285238	0.422422	0.452054	0.457196	0.617927	0.638943	0.631267		0.52306	0.0337532
85	0.759678	0.651643	0.558188	0.438809	0.942396	0.781964	0.517066	0.534098	0.716143	0.542199	0.577732	0.474878	0.248811	0.264706	0.297595	0.576958	0.383983	0.397589	0.288978	0.426157	0.449667	0.476648	0.617579	0.651267	0.635415		0.528406	0.0343179
86	0.750386	0.655206	0.599686	0.439536	0.950689	0.790389	0.541378	0.507477	0.672581	0.541331	0.585445	0.470047	0.258625	0.267127	0.298167	0.606463	0.376981	0.429856	0.299604	0.418723	0.449457	0.492001	0.627786	0.664126	0.651856		0.533797	0.0341821
87	0.730037	0.665745	0.631863	0.446293	0.961394	0.808218	0.554476	0.492214	0.639131	0.540069	0.5857	0.467209	0.289307	0.26222	0.309096	0.626026	0.383534	0.43842	0.31246	0.42809	0.449149	0.519339	0.64141	0.676372	0.662621		0.540816	0.0339306
88	0.718485	0.687026	0.614617	0.445495	0.971993	0.812081	0.570335	0.489897	0.653833	0.544937	0.574003	0.457833	0.308738	0.262087	0.312533	0.640519	0.385016	0.435533	0.323669	0.433431	0.454878	0.530064	0.651588	0.6884	0.673333		0.545613	0.034093
89	0.706795	0.705971	0.606699	0.442945	0.980995	0.80686	0.573922	0.4957	0.660133	0.58691	0.566018	0.457368	0.32307	0.267796	0.314871	0.664434	0.376957	0.405102	0.32347	0.452196	0.46558	0.55062	0.672559	0.716378	0.679655		0.55212	0.0346178
90	0.705019	0.700751	0.622293	0.44144	0.988148	0.811588	0.575342	0.500544	0.616771	0.589566	0.569481	0.460993	0.324844	0.271539	0.326141	0.682227	0.366142	0.384925	0.324754	0.478181	0.471875	0.553527	0.688828	0.727716	0.707129		0.55559	0.0350058
91	0.702095	0.69081	0.615812	0.444118	0.994377	0.82475	0.57955	0.47997	0.608895	0.605304	0.573239	0.465201	0.317049	0.274036	0.350816	0.723535	0.349438	0.380213	0.338926	0.515151	0.473169	0.543338	0.699674	0.736461	0.729989		0.560637	0.0355718
92	0.714206	0.67754	0.632855	0.449141	0.999032	0.854681	0.581778	0.470285	0.598653	0.636156	0.591606	0.482469	0.31664	0.268233	0.388282	0.758524	0.337331	0.383661	0.347902	0.560181	0.475873	0.559391	0.700961	0.750241	0.738714		0.570974	0.0362534
93	0.712162	0.669241	0.701016	0.4469	1	0.867483	0.577321	0.470487	0.571199	0.714668	0.599892	0.500757	0.315552	0.273673	0.401572	0.793803	0.335989	0.384075	0.352374	0.564038	0.479134	0.577055	0.699847	0.784116	0.745449		0.581512	0.0373846
94	0.705929	0.670848	0.770033	0.439754	0.995978	0.877904	0.574504	0.479189	0.568185	0.667059	0.613816	0.540184	0.319158	0.292514	0.418096	0.849792	0.32902	0.39065	0.373701	0.547795	0.491223	0.607507	0.699963	0.834502	0.757217		0.592581	0.0380722
95	0.737726	0.678955	0.806897	0.438696	0.98672	0.885436	0.564317	0.486442	0.579412	0.590405	0.633069	0.568755	0.324464	0.307852	0.415128	0.889796	0.329327	0.391312	0.38125	0.55006	0.495889	0.623109	0.706716	0.884685	0.767587		0.60096	0.0391635
96	0.886538	0.68467	0.842559	0.435018	0.97097	0.887196	0.565819	0.492861	0.543606	0.577282	0.646224	0.571998	0.327101	0.341868	0.418253	0.931662	0.331912	0.393122	0.388326	0.552061	0.502356	0.670107	0.723493	0.90875	0.805649		0.615976	0.0412621
97	1	0.690237	0.733379	0.43979	0.949904	0.880149	0.574343	0.514874	0.528435	0.547416	0.673653	0.58806	0.337788	0.37124	0.432115	0.947747	0.334556	0.412974	0.40958	0.561512	0.513685	0.705139	0.731739	0.962132	0.892202		0.629306	0.0423903
98	0.955382	0.684513	0.664128	0.452481	0.92749	0.894226	0.578271	0.558237	0.536285	0.551408	0.704609	0.588638	0.360114	0.424566	0.477857	0.980468	0.33361	0.446343	0.465748	0.584902	0.534355	0.808612	0.771635	1	0.949686		0.649343	0.0414802
99	0.83402	0.717827	0.623529	0.458273	0.90447	0.893828	0.5865	0.59005	0.635448	0.567904	0.770714	0.573809	0.376335	0.54946	0.54867	0.98128	0.342938	0.502629	0.562312	0.587269	0.572426	0.938956	0.890088	0.98308	1		0.679673	0.039292
100	0.795606	0.779504	0.523022	0.473947	0.886275	0.87607	0.601315	0.617145	0.820465	0.54888	0.915913	0.57719	0.400251	0.72467	0.608982	0.944729	0.35748	0.569346	0.642748	0.592602	0.61971	1	1	0.978306	0.996584		0.71403	0.0394549
