# Supplementary material for: Concerted action of neuroepithelial basal shrinkage and active epithelial migration ensures efficient optic cup morphogenesis
Source: eLife. 2017 Apr 4;6:e22689. doi: 10.7554/eLife.22689 (PMC5380436; doi:10.7554/eLife.22689)
Supplement: Figure 2—source data 3. — DOI: http://dx.doi.org/10.7554/eLife.22689.012 [file elife-22689-fig2-data3.xlsx]

## Sheet: DMSO control
Figure 2 - source data 3
Normalised intensity distribution -anti-phosphomyosin :DMSO Control
Basal to apical position in RNE	section 1	section 2	section 3	section 4	section 5	section 6	section 7	section 8	section 9	section 10	section 11	section 12	section 13	section 14	section 15	section 16	section 17	section 18	section 19	section 20	section 21	section 22	section 23	section 24	section 25		Mean	SEM
1	0.785675	0.909242	0.795133	1	0.725491	0.88005	0.461255	0.764931	0.83151	0.679849	0.521176	0.685695	0.715884	0.545995	0.677613	0.727584	0.669619	0.814287	0.616296	0.733822	0.753048	0.726962	0.903082	0.773508	0.734933		0.737305	0.0244377
2	0.834283	1	0.851881	0.8742	0.730248	0.803296	0.533327	0.716236	0.818529	0.675917	0.581254	0.721734	0.71643	0.619901	0.693197	0.81803	0.618173	0.728781	0.629509	0.7867	0.803534	0.748087	1	0.857462	0.743083		0.756152	0.0231591
3	0.880199	0.856417	0.882793	0.831228	0.79746	0.766498	0.621466	0.695874	0.797334	0.659009	0.609898	0.741361	0.729356	0.610367	0.701171	0.768739	0.595543	0.640286	0.594043	0.792716	0.840233	0.740413	0.991044	0.855923	0.723738		0.748924	0.0211197
4	0.817126	0.77159	0.850008	0.786813	0.797439	0.739927	0.620465	0.765825	0.810799	0.671578	0.63658	0.734994	0.715842	0.624356	0.687186	0.74615	0.61069	0.6198	0.593994	0.759377	0.822118	0.732209	0.901881	0.864447	0.743722		0.736997	0.0172163
5	0.796622	0.778664	0.829443	0.754369	0.785343	0.757877	0.612287	0.752721	0.848533	0.724215	0.624779	0.721394	0.706328	0.630094	0.676646	0.756326	0.655918	0.634274	0.622136	0.823887	0.871734	0.736674	0.892101	0.850273	0.749574		0.743688	0.0166577
6	0.824074	0.784122	0.856297	0.782334	0.758386	0.760061	0.616054	0.745616	0.903814	0.815621	0.631155	0.748041	0.732881	0.618256	0.699978	0.768433	0.749365	0.65852	0.681577	0.80121	0.918384	0.773145	0.883742	0.923458	0.767362		0.768075	0.0175301
7	0.868435	0.822689	0.872938	0.820743	0.745817	0.797533	0.608368	0.77168	0.922534	0.825752	0.665581	0.775582	0.768703	0.653402	0.661184	0.845615	0.82824	0.659568	0.686668	0.758284	0.925962	0.78984	0.888587	0.980943	0.811501		0.790246	0.0191047
8	0.929756	0.837515	0.921887	0.851847	0.781635	0.807057	0.666793	0.774133	0.936823	0.859987	0.657941	0.811323	0.755497	0.683029	0.650486	0.811582	0.861492	0.675096	0.676191	0.82362	0.950332	0.817877	0.883091	0.908254	0.833258		0.80666	0.018805
9	0.962002	0.876592	0.899627	0.905026	0.804738	0.864739	0.732412	0.810506	0.925762	0.881703	0.675117	0.808376	0.77724	0.67502	0.633221	0.821065	0.79286	0.685325	0.662971	0.835521	0.886686	0.880985	0.89163	0.835824	0.818348		0.813732	0.0181259
10	0.963023	0.86352	0.934807	0.898226	0.80147	0.875617	0.794118	0.877397	0.917142	0.92842	0.66666	0.836624	0.77611	0.689316	0.639872	0.884592	0.79858	0.699508	0.669722	0.860474	0.902906	0.910638	0.926539	0.848109	0.828711		0.831684	0.0188302
11	0.946318	0.801505	0.966647	0.907059	0.826232	0.865058	0.767532	0.919218	0.878915	0.92247	0.661032	0.896249	0.784583	0.6757	0.667116	0.924648	0.812246	0.700759	0.706893	0.897217	0.950705	0.89964	0.940713	0.853691	0.84825		0.840816	0.0193063
12	0.951632	0.814316	0.990953	0.914066	0.831344	0.883717	0.753085	0.933562	0.850078	0.876314	0.677332	0.928967	0.800883	0.624337	0.660267	0.939662	0.854214	0.739885	0.756988	0.869251	0.958682	0.896198	0.956102	0.960024	0.806674		0.849141	0.0203258
13	0.95079	0.827241	0.979469	0.89811	0.850988	0.962983	0.749033	0.935094	0.892503	0.842225	0.706485	0.942898	0.82187	0.66047	0.696614	0.973192	0.790936	0.742519	0.759316	0.862858	0.915381	0.907346	0.954202	1	0.820721		0.85773	0.0195865
14	0.987395	0.832634	0.973951	0.909799	0.85357	0.972395	0.796996	0.974347	0.891262	0.846898	0.707204	0.950693	0.829715	0.647837	0.679104	0.958151	0.792196	0.757573	0.739398	0.861694	0.921074	0.921382	0.964141	0.954863	0.812485		0.86147	0.0200978
15	1	0.843952	1	0.918193	0.859448	0.929627	0.809362	0.993148	0.906294	0.862322	0.662893	0.908071	0.826525	0.642468	0.68378	0.898071	0.826877	0.801208	0.768392	0.886209	0.991579	0.917995	0.963194	0.932753	0.807888		0.86561	0.0201833
16	0.990378	0.858151	0.991236	0.901262	0.841843	0.879974	0.823349	0.965046	0.919956	0.984397	0.715736	0.875846	0.873833	0.663306	0.698815	0.854319	0.92216	0.798785	0.773394	0.862181	0.9771	0.916869	0.98122	0.896159	0.779334		0.869786	0.0185399
17	0.985902	0.874467	0.948877	0.876629	0.87049	0.869402	0.887873	1	0.928734	0.9576	0.733812	0.858967	0.898524	0.689645	0.714967	0.856917	0.901264	0.769921	0.735097	0.871919	0.959934	0.951223	0.964126	0.929656	0.787266		0.872928	0.0176639
18	0.981161	0.861112	0.943845	0.908468	0.934747	0.912547	0.937132	0.977291	0.959571	0.871143	0.752655	0.869308	0.943404	0.686746	0.759113	0.850524	0.921444	0.755118	0.744223	0.850234	0.959024	0.98329	0.954005	0.919727	0.812858		0.881948	0.0171693
19	0.979021	0.870928	0.939599	0.887472	0.925818	0.927883	0.9423	0.929075	0.965676	0.820544	0.755331	0.903945	0.931616	0.679389	0.774064	0.884744	0.94082	0.748966	0.753975	0.874144	0.976273	1	0.935455	0.882109	0.847936		0.883083	0.016815
20	0.951542	0.83557	0.92608	0.888321	0.864824	0.99237	0.940398	0.890185	0.968626	0.810732	0.789383	0.933946	0.942696	0.703783	0.773137	0.9257	0.924158	0.768281	0.816592	0.893381	0.965598	0.998946	0.927621	0.837294	0.849582		0.88475	0.0154228
21	0.886879	0.829121	0.883783	0.886998	0.803987	1	1	0.891379	0.92969	0.817495	0.82117	0.984811	0.993256	0.74394	0.779311	0.958261	0.97637	0.809102	0.777996	0.91987	0.949879	0.970042	0.911398	0.835895	0.840135		0.888031	0.0157076
22	0.83278	0.872358	0.861208	0.8465	0.815268	0.992476	0.941234	0.910414	0.962087	0.863066	0.89975	1	0.980565	0.772599	0.763835	0.988395	0.970227	0.78845	0.785756	0.909573	0.99492	0.962153	0.903798	0.864555	0.860691		0.893706	0.0150942
23	0.842168	0.859132	0.901321	0.846442	0.868511	0.979385	0.924245	0.876052	1	0.892459	0.955653	0.966641	0.977966	0.896415	0.789367	0.978027	0.945589	0.837596	0.777777	0.918811	1	0.971766	0.915449	0.898856	0.891917		0.908462	0.0124689
24	0.82237	0.804617	0.898104	0.842009	0.841578	0.943353	0.910636	0.888559	0.997721	0.917878	0.924573	0.956848	0.980627	0.976915	0.826416	1	0.932838	0.932646	0.781182	0.985221	0.961822	0.986783	0.897477	0.883225	0.949989		0.913735	0.0128135
25	0.785507	0.782806	0.858402	0.808096	0.827889	0.917842	0.920331	0.901229	0.973512	1	0.942961	0.972256	0.937108	1	0.798943	0.964334	0.946464	0.990908	0.80071	0.957174	0.980848	0.960727	0.882094	0.911046	0.975607		0.911872	0.014581
26	0.783326	0.766288	0.819502	0.773344	0.800988	0.893819	0.903814	0.882935	0.930265	0.997447	1	0.979909	0.933001	0.967114	0.797125	0.921289	0.976561	0.90602	0.784102	0.924801	0.969052	0.949572	0.869785	0.859991	0.967875		0.894317	0.0153336
27	0.82145	0.736866	0.816688	0.734604	0.781627	0.894377	0.892848	0.889258	0.877619	0.973006	0.986135	0.965816	0.889944	0.964688	0.798292	0.899577	1	0.835016	0.784482	0.994374	0.940973	0.951732	0.865348	0.856756	0.943156		0.883785	0.0159526
28	0.820435	0.719269	0.800307	0.762202	0.794258	0.925718	0.870281	0.916255	0.84634	0.925263	0.981777	0.937167	0.871832	0.914132	0.836247	0.995204	0.98111	0.828652	0.80074	0.993516	0.940485	0.952777	0.870985	0.853229	0.951905		0.883603	0.0152923
29	0.793841	0.667423	0.772425	0.769932	0.846048	0.932967	0.867917	0.921737	0.836352	0.892012	0.928326	0.912308	0.859788	0.922674	0.85724	0.996528	0.908865	0.784478	0.829266	0.974726	0.955557	0.963958	0.855617	0.888695	0.970713		0.876376	0.0156383
30	0.760203	0.657014	0.78737	0.782976	0.835932	0.939471	0.88777	0.912773	0.821458	0.859322	0.945671	0.876871	0.892746	0.906163	0.878777	0.977379	0.895877	0.81067	0.902423	0.982539	0.94414	0.956892	0.843766	0.893072	1		0.878051	0.0157628
31	0.775944	0.663875	0.786918	0.774135	0.815671	0.972553	0.927913	0.931531	0.813486	0.830221	0.985853	0.862536	0.890956	0.84972	0.850093	0.936949	0.904027	0.803898	0.87631	0.956245	0.904523	0.951565	0.863745	0.858346	0.953291		0.869612	0.015274
32	0.737796	0.661645	0.738329	0.742814	0.8093	0.937031	0.930456	0.926256	0.831644	0.84892	0.983486	0.880993	0.854668	0.809176	0.835412	0.929595	0.865255	0.804388	0.846038	0.961934	0.872911	0.948337	0.868019	0.844987	0.924372		0.85575	0.0158644
33	0.715282	0.654895	0.729806	0.734977	0.822916	0.927164	0.900765	0.949276	0.823486	0.895947	0.947882	0.855678	0.841696	0.823138	0.867376	0.948033	0.881994	0.851607	0.858283	0.993847	0.885107	0.92897	0.842604	0.87336	0.932636		0.859469	0.0163598
34	0.721099	0.653899	0.679386	0.769309	0.783753	0.907886	0.878082	0.97737	0.804331	0.907035	0.933541	0.856606	0.817157	0.846981	0.936471	0.941642	0.876876	0.8352	0.876399	0.970797	0.880187	0.889722	0.79755	0.885234	0.963923		0.855617	0.0173045
35	0.760068	0.629355	0.665275	0.801456	0.800689	0.866496	0.83336	0.952644	0.814016	0.989042	0.939852	0.85748	0.789535	0.817141	0.985931	0.962434	0.863632	0.837914	0.913492	1	0.859325	0.892903	0.782927	0.895765	0.921054		0.857271	0.0187301
36	0.759734	0.634781	0.65952	0.794066	0.847433	0.843303	0.795323	0.939296	0.806685	0.936306	0.919538	0.838312	0.789662	0.801964	1	0.910818	0.941464	0.827156	0.915563	0.96248	0.851372	0.896441	0.76391	0.81213	0.940327		0.847503	0.0180823
37	0.721579	0.637513	0.648183	0.744893	0.816094	0.84057	0.816208	0.933738	0.828094	0.871705	0.92179	0.825405	0.799429	0.783288	0.978917	0.891583	0.930696	0.835673	0.884915	0.900199	0.831675	0.87518	0.713729	0.758467	0.930787		0.828812	0.0177274
38	0.693678	0.639615	0.66226	0.758136	0.8297	0.824197	0.824783	0.93597	0.805463	0.832721	0.935821	0.828397	0.768611	0.775211	0.958263	0.927232	0.840057	0.873965	0.952596	0.931255	0.792772	0.883267	0.684378	0.749505	0.889868		0.823909	0.0185198
39	0.672334	0.661246	0.714868	0.766012	0.847768	0.807559	0.815491	0.865626	0.761726	0.816294	0.908487	0.828053	0.778432	0.764852	0.963635	0.965249	0.815153	0.88657	1	0.877609	0.784971	0.887807	0.667858	0.727008	0.833508		0.816725	0.0182352
40	0.647863	0.66469	0.690859	0.754316	0.87746	0.840352	0.807639	0.829634	0.753467	0.81962	0.922804	0.832438	0.791316	0.739127	0.957842	0.944365	0.776273	0.83878	0.919418	0.833651	0.785141	0.900647	0.666147	0.717379	0.816219		0.805098	0.0175311
41	0.613615	0.63679	0.659979	0.716607	0.897052	0.855636	0.770911	0.794325	0.747378	0.839877	0.887942	0.847955	0.816289	0.789174	0.930791	0.958102	0.768767	0.85973	0.867426	0.829451	0.764432	0.865059	0.660897	0.699846	0.8178		0.795833	0.0183905
42	0.64317	0.622453	0.703916	0.740806	0.903449	0.79603	0.732956	0.800861	0.751818	0.854103	0.875659	0.856617	0.83021	0.799519	0.916062	0.963991	0.779501	0.891639	0.814183	0.831989	0.748809	0.831457	0.655612	0.684189	0.833235		0.794489	0.0176909
43	0.629723	0.583343	0.720443	0.711282	0.886386	0.778207	0.722089	0.832796	0.76174	0.955102	0.877495	0.868923	0.82904	0.744584	0.930269	0.969233	0.837248	0.919205	0.811141	0.887686	0.772538	0.798416	0.643317	0.690808	0.839827		0.800034	0.0205444
44	0.653596	0.578767	0.673383	0.687169	0.806292	0.771069	0.734565	0.807063	0.708691	0.957475	0.887488	0.836735	0.798961	0.68355	0.9409	0.943995	0.833021	1	0.771628	0.898369	0.769457	0.808587	0.63307	0.659867	0.801957		0.785826	0.0221998
45	0.638123	0.597445	0.64322	0.670308	0.727268	0.762287	0.710968	0.774556	0.666811	0.933343	0.889498	0.835533	0.786233	0.684179	0.998216	0.930079	0.805649	0.845788	0.771995	0.848507	0.767077	0.831968	0.631473	0.680694	0.767174		0.767936	0.0209725
46	0.59559	0.588669	0.631037	0.684707	0.753851	0.748437	0.724047	0.777589	0.67484	0.914219	0.875571	0.833709	0.781457	0.697506	0.957682	0.897107	0.824728	0.815715	0.815447	0.820494	0.739977	0.825404	0.627002	0.679046	0.749185		0.761321	0.0198137
47	0.586659	0.623771	0.638454	0.686629	0.777001	0.745641	0.696914	0.771626	0.668725	0.92759	0.837554	0.816698	0.768318	0.726364	0.934296	0.839761	0.8335	0.791107	0.765233	0.845428	0.735942	0.805949	0.633963	0.665533	0.710426		0.753323	0.0182345
48	0.578566	0.614843	0.628547	0.664052	0.801238	0.724511	0.641458	0.738176	0.669626	0.902878	0.823439	0.836096	0.776636	0.741089	0.928396	0.857666	0.847739	0.72751	0.67737	0.825865	0.717829	0.805416	0.647103	0.698477	0.684076		0.742344	0.0188482
49	0.561983	0.617317	0.624238	0.670836	0.797887	0.713458	0.620557	0.755071	0.649096	0.856372	0.832432	0.833862	0.755368	0.70906	0.927521	0.812312	0.851625	0.708176	0.61488	0.80608	0.727985	0.794213	0.646104	0.697321	0.671113		0.730195	0.0188759
50	0.5784	0.611407	0.64722	0.622803	0.768728	0.735936	0.60741	0.750623	0.641264	0.816875	0.834604	0.823726	0.750137	0.712513	0.93419	0.7782	0.884822	0.690298	0.595284	0.805632	0.683632	0.772	0.649018	0.675369	0.654368		0.720978	0.0190968
51	0.602275	0.569705	0.625861	0.622642	0.760236	0.731792	0.599715	0.741063	0.653923	0.761781	0.83911	0.835269	0.77727	0.687725	0.96208	0.783006	0.879774	0.724408	0.589669	0.834202	0.658287	0.743232	0.654072	0.681092	0.669515		0.719508	0.020011
52	0.588418	0.580226	0.678367	0.601188	0.725241	0.703141	0.608804	0.76012	0.65609	0.732521	0.853127	0.840889	0.807499	0.713449	0.935394	0.829721	0.88998	0.741219	0.585955	0.791608	0.651655	0.742834	0.645319	0.680223	0.655416		0.719936	0.019944
53	0.593457	0.557829	0.655083	0.59194	0.783997	0.689211	0.624883	0.763031	0.675625	0.728455	0.835152	0.816203	0.779058	0.748754	0.832947	0.884579	0.891594	0.723042	0.601469	0.837105	0.653689	0.736248	0.639118	0.669859	0.664062		0.719056	0.019219
54	0.595382	0.559394	0.650922	0.583113	0.829516	0.700321	0.630019	0.747119	0.681501	0.708183	0.824409	0.798476	0.782744	0.755721	0.769934	0.866406	0.906309	0.712485	0.583253	0.850845	0.653101	0.717483	0.632688	0.662218	0.648571		0.714005	0.0193263
55	0.602282	0.552566	0.629824	0.592835	0.81553	0.699581	0.633628	0.718126	0.667092	0.729039	0.834578	0.765006	0.762777	0.751309	0.755068	0.845049	0.891051	0.727719	0.570285	0.794934	0.649597	0.694271	0.636091	0.679972	0.643445		0.705666	0.0179465
56	0.613914	0.519334	0.63432	0.613294	0.784378	0.639181	0.635634	0.730097	0.672458	0.755559	0.81118	0.754966	0.777115	0.741099	0.750755	0.835116	0.895401	0.738888	0.577172	0.731846	0.633578	0.685925	0.631138	0.680203	0.656927		0.699979	0.0174566
57	0.607023	0.531068	0.701808	0.591466	0.796306	0.640172	0.643446	0.731621	0.640239	0.808392	0.828914	0.737898	0.798276	0.706981	0.73183	0.858197	0.876151	0.712386	0.559711	0.735261	0.62816	0.689773	0.623657	0.67454	0.673966		0.70109	0.0182408
58	0.590034	0.526167	0.687213	0.574307	0.760906	0.66617	0.639108	0.704346	0.620337	0.797486	0.797509	0.707912	0.781657	0.68407	0.755992	0.891603	0.865923	0.680308	0.565032	0.710319	0.599241	0.691327	0.624327	0.674668	0.661153		0.690285	0.0183043
59	0.609564	0.522101	0.676339	0.566689	0.74565	0.652557	0.657937	0.731184	0.618069	0.796153	0.823046	0.704311	0.747718	0.688321	0.721645	0.945202	0.834444	0.672836	0.566925	0.720043	0.603506	0.689033	0.619461	0.705033	0.646281		0.690562	0.0188363
60	0.618545	0.5257	0.683916	0.567165	0.755835	0.643193	0.687603	0.748887	0.621381	0.810077	0.828008	0.714627	0.738607	0.680728	0.7133	0.936406	0.862557	0.677399	0.551325	0.703896	0.630057	0.674072	0.628919	0.717995	0.645581		0.694631	0.0190992
61	0.628243	0.528	0.69194	0.580433	0.754684	0.637955	0.689716	0.753979	0.623587	0.787366	0.834891	0.712977	0.75145	0.642624	0.709983	0.998535	0.874289	0.680814	0.563602	0.676735	0.636747	0.665694	0.63623	0.694417	0.658059		0.696518	0.020272
62	0.625237	0.537822	0.712416	0.539651	0.748921	0.619757	0.658709	0.721457	0.643753	0.729449	0.827665	0.739582	0.774098	0.636742	0.731971	0.983747	0.864372	0.672244	0.571042	0.669918	0.603555	0.66485	0.645169	0.671607	0.69468		0.691536	0.0199828
63	0.648122	0.541745	0.718627	0.560003	0.682339	0.637047	0.684296	0.726903	0.656382	0.666582	0.876836	0.767855	0.735731	0.626187	0.686884	0.875235	0.857599	0.642518	0.566107	0.663653	0.621648	0.65833	0.650702	0.667528	0.687556		0.684257	0.0174229
64	0.640764	0.536482	0.739515	0.587127	0.611063	0.638896	0.681763	0.743229	0.671373	0.682392	0.843993	0.766799	0.734575	0.632687	0.664519	0.832901	0.810289	0.649134	0.601195	0.668474	0.599536	0.661073	0.655801	0.630017	0.664378		0.677919	0.0154064
65	0.648517	0.523942	0.728981	0.612116	0.631879	0.664629	0.684933	0.74541	0.683079	0.739864	0.862667	0.769917	0.728161	0.608816	0.641657	0.817922	0.807581	0.625901	0.604333	0.655603	0.586033	0.674276	0.674039	0.607245	0.649618		0.679085	0.0159557
66	0.667742	0.572454	0.747503	0.59518	0.669742	0.6861	0.673088	0.752586	0.670468	0.736468	0.896326	0.751838	0.717781	0.603123	0.674947	0.753163	0.772891	0.645187	0.591989	0.635499	0.60829	0.674171	0.668932	0.640467	0.649729		0.682226	0.0143817
67	0.7195	0.575261	0.768618	0.578042	0.640652	0.698549	0.690773	0.752359	0.651175	0.727195	0.892105	0.767308	0.720575	0.610043	0.657504	0.741562	0.79909	0.683721	0.583425	0.6469	0.637885	0.671237	0.668046	0.61239	0.644958		0.685555	0.0150648
68	0.710147	0.56652	0.820068	0.559804	0.588311	0.725286	0.721555	0.761637	0.64627	0.795548	0.887684	0.772393	0.710144	0.611464	0.616986	0.774994	0.787938	0.68904	0.586553	0.650823	0.607486	0.693853	0.666722	0.60289	0.662111		0.688649	0.0174546
69	0.667479	0.574593	0.824752	0.585618	0.591288	0.734779	0.7138	0.792214	0.63822	0.797598	0.869703	0.780701	0.721508	0.600228	0.56529	0.768106	0.779261	0.663256	0.587012	0.667751	0.589298	0.716951	0.670333	0.607209	0.675466		0.687297	0.0177505
70	0.682826	0.595941	0.816868	0.592282	0.588057	0.733777	0.715476	0.79571	0.648446	0.77914	0.870406	0.76333	0.738589	0.613951	0.612189	0.759593	0.750543	0.644674	0.573942	0.669933	0.582327	0.69618	0.684949	0.614312	0.693017		0.688658	0.0164447
71	0.669752	0.606587	0.814861	0.606796	0.575324	0.754662	0.747341	0.809977	0.657591	0.73256	0.911906	0.742493	0.735575	0.639551	0.635438	0.801183	0.769162	0.689429	0.589489	0.672103	0.581857	0.673917	0.694484	0.621409	0.697524		0.697239	0.0169228
72	0.662856	0.59673	0.790123	0.606102	0.598752	0.746203	0.756351	0.792828	0.657271	0.7033	0.885773	0.716971	0.747027	0.648099	0.709322	0.808935	0.749597	0.65876	0.592138	0.694286	0.565381	0.671941	0.704879	0.627271	0.688198		0.695164	0.0156131
73	0.676389	0.597373	0.82513	0.597008	0.632227	0.739357	0.749425	0.787981	0.661334	0.67563	0.887	0.704405	0.714471	0.729068	0.635557	0.796985	0.71931	0.674442	0.639843	0.676539	0.571056	0.670832	0.722032	0.639246	0.682594		0.696209	0.0148416
74	0.655664	0.5818	0.804772	0.609046	0.6514	0.754241	0.713255	0.805349	0.660222	0.648524	0.934379	0.707765	0.70828	0.696906	0.610538	0.792152	0.713422	0.699335	0.657931	0.694836	0.587372	0.66803	0.699087	0.649629	0.697912		0.696074	0.0155673
75	0.647112	0.594096	0.806123	0.625458	0.618046	0.767064	0.712693	0.795874	0.660833	0.634163	0.91124	0.69893	0.727681	0.63708	0.60624	0.759601	0.698142	0.688414	0.663722	0.702282	0.572592	0.663721	0.70292	0.625423	0.698084		0.688701	0.0152943
76	0.657228	0.605159	0.829899	0.661219	0.597441	0.76213	0.764532	0.807214	0.649884	0.652284	0.873542	0.691424	0.769593	0.669958	0.642666	0.74642	0.673149	0.715016	0.672181	0.712615	0.57444	0.670424	0.711349	0.618742	0.68819		0.696668	0.014749
77	0.606631	0.649223	0.850809	0.671615	0.585168	0.745213	0.769922	0.878319	0.68876	0.701429	0.897766	0.683654	0.812152	0.691127	0.61855	0.771784	0.630063	0.729685	0.661993	0.758837	0.554261	0.6682	0.725726	0.624103	0.681336		0.706253	0.0177687
78	0.60934	0.665401	0.815992	0.657551	0.589325	0.766207	0.851489	0.924745	0.703478	0.670946	0.933117	0.687049	0.892143	0.740257	0.642569	0.8056	0.665513	0.743279	0.680611	0.738732	0.560775	0.685331	0.744429	0.62153	0.673167		0.722743	0.0201485
79	0.613513	0.646941	0.788089	0.702798	0.647841	0.789864	0.828835	0.943712	0.746474	0.695396	0.911093	0.715201	0.819491	0.77724	0.691878	0.784054	0.687507	0.784855	0.660566	0.743947	0.591038	0.69185	0.754019	0.620758	0.67359		0.732422	0.0175877
80	0.613447	0.644795	0.835176	0.719521	0.643635	0.840371	0.730325	0.912547	0.792394	0.73999	0.887368	0.736287	0.827515	0.777574	0.713401	0.7645	0.703654	0.799467	0.676867	0.752372	0.599022	0.691926	0.766609	0.642506	0.680202		0.739659	0.0165129
81	0.632768	0.643451	0.791403	0.661013	0.658238	0.847152	0.723662	0.836317	0.80241	0.806379	0.916114	0.771175	0.824099	0.81556	0.711755	0.780378	0.712412	0.811135	0.704022	0.744617	0.613515	0.70915	0.756255	0.668683	0.671266		0.744517	0.0156292
82	0.625664	0.639184	0.780179	0.635778	0.657017	0.842645	0.718273	0.796851	0.825983	0.804837	0.916958	0.781927	0.853861	0.845874	0.690996	0.766	0.716645	0.805221	0.702188	0.734834	0.636419	0.729145	0.739491	0.699672	0.669127		0.744591	0.0159156
83	0.641549	0.624678	0.781457	0.642933	0.680763	0.861717	0.729478	0.787059	0.8452	0.796554	0.876345	0.795672	0.871219	0.864703	0.705484	0.708467	0.6943	0.796484	0.725143	0.7422	0.654134	0.752189	0.737966	0.704603	0.671644		0.747678	0.0154474
84	0.639335	0.6303	0.766079	0.64634	0.712737	0.86198	0.720291	0.80597	0.846491	0.804971	0.822983	0.782776	0.888118	0.854191	0.748115	0.706777	0.687563	0.857364	0.764717	0.778832	0.662867	0.77203	0.739141	0.706276	0.710255		0.75666	0.0148947
85	0.67238	0.624708	0.754762	0.656336	0.714724	0.824781	0.666579	0.832411	0.818878	0.781597	0.776541	0.781869	0.923555	0.895421	0.752148	0.737503	0.719015	0.850205	0.809033	0.809222	0.649889	0.780984	0.710939	0.682314	0.699864		0.757026	0.0156184
86	0.709347	0.614016	0.745662	0.66859	0.740336	0.809168	0.66819	0.853049	0.719967	0.750776	0.738929	0.77897	1	0.930625	0.777439	0.77146	0.740357	0.839836	0.819165	0.910946	0.677238	0.83294	0.699789	0.689192	0.701372		0.767494	0.0181593
87	0.716949	0.630271	0.697848	0.696161	0.789917	0.794616	0.700881	0.874685	0.689618	0.772482	0.737104	0.780686	0.9688	0.904907	0.760844	0.781234	0.767998	0.858623	0.767913	0.952365	0.697681	0.860129	0.694435	0.695401	0.709277		0.772033	0.0175434
88	0.736126	0.659326	0.722934	0.735779	0.846901	0.781289	0.690275	0.907487	0.689864	0.799718	0.744749	0.777917	0.938782	0.884149	0.757981	0.822476	0.754434	0.886628	0.751781	0.957797	0.671443	0.873558	0.69763	0.679827	0.757173		0.781041	0.0173624
89	0.738806	0.637713	0.716471	0.75834	0.948843	0.73671	0.710468	0.916676	0.687458	0.77477	0.737075	0.776186	0.903075	0.836407	0.769508	0.813554	0.755037	0.889918	0.779692	0.944123	0.681443	0.895285	0.698561	0.705513	0.803846		0.784619	0.0175699
90	0.711714	0.606619	0.710161	0.743257	1	0.676047	0.752488	0.933791	0.661134	0.796375	0.715353	0.786894	0.877998	0.823202	0.777543	0.806121	0.756724	0.852215	0.809546	0.944816	0.702748	0.904147	0.705634	0.69358	0.814002		0.782484	0.0193444
91	0.682891	0.590179	0.712315	0.744389	0.925674	0.690736	0.778015	0.923195	0.613817	0.815102	0.67284	0.76977	0.877338	0.861907	0.755252	0.804766	0.756614	0.814051	0.790314	0.960408	0.722273	0.89068	0.718947	0.699023	0.770036		0.773621	0.0190685
92	0.679573	0.571214	0.716282	0.79222	0.87946	0.690074	0.742346	0.898199	0.590023	0.851104	0.642791	0.747323	0.876138	0.855933	0.755645	0.820521	0.712473	0.83672	0.764535	0.923311	0.761653	0.868327	0.724024	0.68417	0.70428		0.763534	0.0190396
93	0.665264	0.587682	0.727798	0.768215	0.841345	0.683327	0.6969	0.879391	0.585831	0.859767	0.660145	0.731262	0.852471	0.803816	0.704567	0.866293	0.681528	0.811552	0.817952	0.935119	0.780191	0.855198	0.721402	0.658168	0.669493		0.753787	0.0190538
94	0.688579	0.585135	0.729081	0.726724	0.790066	0.682136	0.675745	0.866491	0.595313	0.850737	0.661054	0.725591	0.819587	0.765521	0.646514	0.834531	0.683727	0.753663	0.809179	0.895312	0.772956	0.855442	0.714724	0.643125	0.656165		0.737084	0.017355
95	0.655839	0.573849	0.697678	0.657877	0.758698	0.694328	0.641814	0.809242	0.601939	0.829133	0.660867	0.718213	0.726642	0.734044	0.617083	0.82776	0.676058	0.739581	0.842463	0.867771	0.753759	0.86475	0.699283	0.61056	0.669899		0.717165	0.0170204
96	0.624472	0.591479	0.70603	0.635809	0.841661	0.673316	0.607534	0.761977	0.593449	0.827159	0.655343	0.700993	0.694547	0.771671	0.651681	0.799409	0.672908	0.693788	0.78507	0.812838	0.726307	0.851581	0.667547	0.621201	0.669691		0.705499	0.0159972
97	0.649711	0.591953	0.750456	0.632162	0.791342	0.654091	0.56945	0.735935	0.597002	0.80924	0.687444	0.727753	0.733289	0.795157	0.710389	0.800078	0.678027	0.725346	0.709192	0.749504	0.69271	0.843932	0.657606	0.636276	0.6769		0.704198	0.0143918
98	0.660684	0.618834	0.740317	0.611575	0.805843	0.651675	0.593529	0.714038	0.595888	0.745341	0.722421	0.741352	0.698151	0.745825	0.787737	0.852494	0.639823	0.729213	0.648083	0.687244	0.707257	0.841331	0.652963	0.628244	0.692982		0.700514	0.014467
99	0.664168	0.593724	0.754587	0.592476	0.794314	0.654181	0.627766	0.723003	0.5891	0.72915	0.690053	0.758098	0.693295	0.731847	0.801902	0.858824	0.626222	0.671038	0.669231	0.673786	0.705373	0.846437	0.625655	0.615624	0.637365		0.693089	0.0153794
100	0.674269	0.575244	0.776374	0.581032	0.760272	0.67163	0.601043	0.762387	0.615758	0.781075	0.67604	0.83401	0.650855	0.746243	0.745266	0.887988	0.641233	0.641788	0.641191	0.654361	0.703745	0.878049	0.619897	0.608472	0.598379		0.693064	0.0180968

## Sheet: Rockout treated
Normalised intensity distribution -anti-phosphomyosin :Rockout treated
Basal to apical position in RNE	section 1	section 2	section 3	section 4	section 5	section 6	section 7	section 8	section 9	section 10	section 11	section 12	section 13	section 14	section 15	section 16	section 17	section 18	section 19	section 20	section 21	section 22	section 23	section 24	section 25		Mean	SEM
1	0.640829	1	0.957933	0.912929	0.907291	0.94541	0.925558	1	0.724193	0.947055	1	0.906385	0.945947	0.921035	0.850205	0.87512	0.989323	1	0.9547	0.990101	1	1	1	0.99376	1		0.935511	0.0177309
2	0.681805	0.889103	1	1	0.897205	0.988431	0.999087	0.918614	0.795623	1	0.96973	1	1	1	0.829267	1	1	0.975352	1	1	0.939119	0.975728	0.954138	1	0.973545		0.95147	0.0158921
3	0.673753	0.800399	0.962307	0.964958	0.889751	0.936596	1	0.821127	0.859725	0.978333	0.946319	0.843449	0.925732	0.941681	0.771122	0.86826	0.927697	0.890857	0.899709	0.957571	0.867056	0.931777	0.915267	0.972061	0.847961		0.895739	0.0149406
4	0.723828	0.747361	0.946232	0.883686	0.880243	0.939993	0.975583	0.706388	0.849799	0.934147	0.941207	0.685516	0.759019	0.905918	0.784414	0.807003	0.768975	0.786617	0.823066	0.870379	0.847323	0.872623	0.839194	0.924737	0.760535		0.838551	0.0165801
5	0.746261	0.691144	0.915464	0.817176	0.866983	0.990695	0.900461	0.646125	0.886603	0.943461	0.842892	0.643686	0.709535	0.855456	0.86104	0.746347	0.7066	0.726496	0.752787	0.841418	0.845027	0.836079	0.817169	0.919181	0.740047		0.809925	0.0188076
6	0.733075	0.65838	0.840387	0.766659	0.851251	1	0.810303	0.620583	0.908545	0.961137	0.789121	0.627402	0.698023	0.801497	0.860154	0.690118	0.680162	0.704105	0.706914	0.808106	0.832206	0.77367	0.812047	0.91962	0.717629		0.782844	0.0201598
7	0.683036	0.636009	0.815589	0.738389	0.852154	0.906103	0.73034	0.604424	0.877237	0.930245	0.784205	0.595617	0.707538	0.834488	0.724958	0.697132	0.635214	0.692674	0.731804	0.800944	0.816995	0.752764	0.789002	0.865991	0.667378		0.754809	0.0186838
8	0.684364	0.632498	0.783746	0.729995	0.861371	0.908099	0.68651	0.60243	0.897938	0.858568	0.764866	0.591469	0.700381	0.841403	0.673887	0.677345	0.612138	0.689031	0.716615	0.753351	0.783253	0.721414	0.757594	0.814809	0.655295		0.735935	0.018158
9	0.688306	0.647503	0.710341	0.712268	0.863711	0.926382	0.657356	0.589493	1	0.838451	0.744089	0.580322	0.665028	0.822859	0.709882	0.6738	0.606502	0.685652	0.694626	0.741022	0.762349	0.673246	0.740076	0.757232	0.6539		0.725776	0.0201423
10	0.6391	0.660071	0.672993	0.713674	0.856517	0.887427	0.658425	0.59286	0.95271	0.825437	0.707219	0.561389	0.669026	0.819738	0.810257	0.682354	0.59701	0.672059	0.698598	0.738391	0.716389	0.619556	0.723085	0.764788	0.642613		0.715267	0.0194713
11	0.604523	0.634289	0.682076	0.691164	0.847735	0.832534	0.625579	0.602746	0.930861	0.837992	0.710614	0.578649	0.666564	0.806279	1	0.674328	0.604122	0.668914	0.697025	0.764023	0.689908	0.562381	0.710334	0.75491	0.625577		0.712125	0.0222397
12	0.571774	0.61211	0.682296	0.674905	0.84299	0.842455	0.588573	0.614516	0.936229	0.865322	0.730215	0.566405	0.630236	0.802854	0.960408	0.667562	0.600381	0.685541	0.665224	0.757346	0.640088	0.546295	0.695917	0.741171	0.592591		0.700536	0.0233405
13	0.602576	0.634982	0.673254	0.68211	0.839243	0.853306	0.604283	0.605066	0.881006	0.845555	0.709862	0.5538	0.66398	0.733837	0.838204	0.652613	0.584288	0.696215	0.688784	0.72859	0.623537	0.544481	0.66247	0.727208	0.568097		0.687894	0.0198028
14	0.62296	0.61419	0.667736	0.665132	0.833324	0.829646	0.611037	0.592487	0.85153	0.788848	0.708422	0.536216	0.646401	0.717444	0.823553	0.638915	0.603072	0.697174	0.67035	0.738063	0.60642	0.538717	0.629532	0.739684	0.563418		0.677371	0.0186383
15	0.630336	0.615326	0.643364	0.621301	0.835844	0.780704	0.59768	0.581275	0.80565	0.779939	0.674603	0.555982	0.640506	0.711673	0.787253	0.644727	0.612476	0.68265	0.660102	0.8057	0.60484	0.538788	0.641041	0.738666	0.557316		0.66991	0.0174501
16	0.632829	0.629567	0.632255	0.592709	0.843355	0.743802	0.585401	0.580101	0.777885	0.796572	0.639141	0.535825	0.647522	0.707531	0.787281	0.634985	0.613505	0.674237	0.656639	0.787569	0.594852	0.533266	0.656387	0.736821	0.567786		0.663513	0.0173331
17	0.65234	0.632924	0.630721	0.59757	0.84424	0.731762	0.590955	0.543939	0.809902	0.810365	0.629341	0.516257	0.659773	0.715658	0.853197	0.633368	0.603878	0.670427	0.630977	0.770802	0.591842	0.516338	0.641724	0.74467	0.561871		0.663394	0.0195448
18	0.638328	0.629321	0.66337	0.604985	0.845931	0.727849	0.586151	0.518709	0.794552	0.779843	0.619804	0.496365	0.67927	0.7266	0.837651	0.609485	0.60008	0.646658	0.649578	0.751294	0.583619	0.488305	0.65452	0.742332	0.549724		0.656973	0.019794
19	0.677251	0.600469	0.659838	0.608121	0.852534	0.73077	0.599017	0.521288	0.780962	0.767754	0.63066	0.456164	0.707313	0.664893	0.847631	0.620004	0.611792	0.627662	0.629418	0.712291	0.582544	0.479034	0.681664	0.743265	0.568421		0.65443	0.0200038
20	0.753754	0.585742	0.648996	0.605648	0.855747	0.728861	0.586266	0.518879	0.764915	0.740621	0.640398	0.410915	0.714382	0.664292	0.849416	0.618767	0.60095	0.63962	0.631342	0.7399	0.585749	0.464447	0.688346	0.733322	0.571076		0.653694	0.0213789
21	0.948736	0.582222	0.65128	0.579745	0.853019	0.749603	0.580447	0.510458	0.746976	0.730365	0.590521	0.405121	0.678914	0.643836	0.790236	0.613081	0.588482	0.647185	0.649049	0.749535	0.568151	0.474483	0.692222	0.723749	0.57946		0.653075	0.0237577
22	1	0.597047	0.663459	0.563167	0.844645	0.753198	0.592838	0.493158	0.742257	0.70497	0.590593	0.402296	0.676362	0.657894	0.740147	0.607963	0.563801	0.655126	0.662812	0.726422	0.559958	0.466063	0.681685	0.722055	0.574101		0.649681	0.0246257
23	0.910057	0.648328	0.652964	0.570787	0.833887	0.761259	0.591532	0.483351	0.731561	0.680983	0.58313	0.41275	0.679202	0.664308	0.723487	0.58096	0.562173	0.613035	0.624494	0.741838	0.565139	0.44727	0.661023	0.693574	0.544222		0.638453	0.0226288
24	0.76043	0.667688	0.641544	0.605172	0.828224	0.755165	0.590843	0.486269	0.762725	0.688372	0.587568	0.409993	0.662812	0.651905	0.700688	0.561711	0.559035	0.619111	0.614198	0.724824	0.570524	0.43827	0.655815	0.670889	0.530696		0.629779	0.0202348
25	0.755776	0.662338	0.634024	0.631291	0.830577	0.731997	0.589209	0.470564	0.760776	0.678047	0.570221	0.416601	0.6548	0.619967	0.692829	0.556408	0.573049	0.620382	0.565333	0.64731	0.564249	0.418344	0.636142	0.683998	0.526298		0.619621	0.0200482
26	0.718951	0.617781	0.657271	0.618373	0.837936	0.71723	0.57564	0.46258	0.765612	0.657583	0.590628	0.415206	0.658447	0.616452	0.679524	0.563802	0.581668	0.595192	0.570943	0.65071	0.539514	0.420142	0.60055	0.684779	0.53968		0.613448	0.0195919
27	0.639948	0.635671	0.674968	0.571924	0.836716	0.692265	0.575363	0.456001	0.754667	0.649822	0.587616	0.400609	0.616519	0.633043	0.701502	0.549629	0.558301	0.582806	0.572007	0.68322	0.519131	0.408773	0.5886	0.696551	0.573392		0.606362	0.0199033
28	0.690412	0.668325	0.689921	0.561244	0.832958	0.695587	0.592215	0.442256	0.743147	0.640424	0.59547	0.400348	0.595701	0.616928	0.713771	0.531672	0.552607	0.571348	0.598627	0.660167	0.482967	0.386151	0.579808	0.671199	0.586476		0.603989	0.0208999
29	0.639779	0.665921	0.669956	0.582544	0.833918	0.654119	0.568915	0.432813	0.702283	0.643718	0.574219	0.370398	0.555858	0.595593	0.731266	0.532435	0.551429	0.551722	0.595416	0.665871	0.477436	0.382642	0.602666	0.650413	0.53883		0.590806	0.0209246
30	0.636471	0.650948	0.672879	0.592154	0.837414	0.622523	0.544712	0.433902	0.704816	0.641756	0.586338	0.35572	0.551698	0.595628	0.679188	0.528271	0.532763	0.539416	0.539282	0.681995	0.469472	0.388975	0.604779	0.642897	0.533601		0.582704	0.0209021
31	0.591995	0.638811	0.642077	0.591399	0.839417	0.621453	0.534929	0.436465	0.673633	0.621978	0.568749	0.35604	0.540694	0.614324	0.702632	0.529725	0.532936	0.547017	0.518753	0.68999	0.462359	0.399665	0.614765	0.640816	0.510918		0.576862	0.020627
32	0.597295	0.636768	0.616433	0.568351	0.843127	0.598372	0.53002	0.439553	0.692027	0.626656	0.553511	0.346206	0.516298	0.607456	0.725151	0.508665	0.546314	0.553326	0.494627	0.646481	0.465963	0.421336	0.591393	0.670433	0.499076		0.571793	0.0209262
33	0.621255	0.599881	0.631543	0.53958	0.842552	0.585972	0.534144	0.430771	0.707546	0.604867	0.573845	0.359571	0.492211	0.634043	0.681561	0.495965	0.526304	0.535301	0.510382	0.630339	0.455677	0.426278	0.59182	0.672983	0.511815		0.567848	0.0205888
34	0.723342	0.569783	0.61294	0.526481	0.841188	0.564726	0.546129	0.439204	0.671318	0.583602	0.546698	0.362747	0.471032	0.620648	0.678767	0.474796	0.499677	0.539796	0.51676	0.620096	0.435104	0.421724	0.5987	0.669704	0.517371		0.562093	0.0211761
35	0.720049	0.584195	0.622065	0.519872	0.840741	0.562953	0.532871	0.441215	0.682633	0.568858	0.5327	0.352679	0.464592	0.629996	0.654055	0.46841	0.486007	0.530678	0.50195	0.607095	0.422138	0.42157	0.587538	0.689362	0.505158		0.557175	0.0218253
36	0.674124	0.58926	0.622112	0.51041	0.84444	0.567577	0.499213	0.446594	0.735282	0.558231	0.515709	0.358113	0.452609	0.594782	0.667034	0.460434	0.487084	0.526801	0.518258	0.591633	0.402591	0.428976	0.579263	0.69768	0.493272		0.552859	0.0223192
37	0.636707	0.611088	0.593697	0.4876	0.850388	0.538113	0.482715	0.433156	0.692977	0.562786	0.521208	0.349094	0.465871	0.59756	0.662772	0.450588	0.469095	0.510736	0.518743	0.562014	0.393842	0.422304	0.580037	0.745126	0.472785		0.54444	0.022855
38	0.611793	0.611974	0.569206	0.490765	0.860042	0.54055	0.473353	0.439532	0.670122	0.56367	0.485698	0.351258	0.460788	0.60702	0.673606	0.448695	0.461909	0.497491	0.513085	0.54656	0.388581	0.422152	0.577945	0.797229	0.466281		0.541172	0.0238777
39	0.604656	0.581402	0.570156	0.485495	0.873313	0.526304	0.457241	0.463142	0.69276	0.558129	0.482617	0.364618	0.455009	0.603143	0.686225	0.438398	0.452417	0.491094	0.504544	0.542344	0.38541	0.433382	0.573798	0.809114	0.474535		0.54037	0.0244569
40	0.604472	0.594076	0.561226	0.498551	0.881672	0.52173	0.457605	0.471945	0.703258	0.569663	0.461821	0.368648	0.446877	0.566113	0.694404	0.431714	0.421666	0.488207	0.517504	0.547878	0.387041	0.455008	0.578517	0.802247	0.481457		0.540532	0.0247394
41	0.573093	0.577179	0.565847	0.477565	0.882934	0.498938	0.443019	0.4614	0.735604	0.592066	0.448025	0.367686	0.446882	0.545965	0.692215	0.438122	0.397693	0.492041	0.519971	0.547359	0.391995	0.452509	0.561991	0.808446	0.505566		0.536964	0.0254743
42	0.565343	0.563247	0.573021	0.481055	0.879426	0.509094	0.42901	0.437669	0.792438	0.570876	0.429995	0.377213	0.446882	0.560497	0.701662	0.43343	0.412479	0.495158	0.529441	0.578989	0.393155	0.430338	0.555302	0.80599	0.515293		0.53868	0.0264452
43	0.610317	0.538555	0.551484	0.471074	0.877274	0.504062	0.431717	0.436677	0.76539	0.573164	0.427702	0.364888	0.457844	0.584384	0.681405	0.418964	0.396339	0.506894	0.524725	0.632405	0.376902	0.433999	0.588558	0.787346	0.509767		0.538073	0.0264108
44	0.601719	0.535597	0.538332	0.46835	0.878294	0.510759	0.428097	0.425711	0.718793	0.567471	0.413604	0.358487	0.469675	0.562793	0.672203	0.415847	0.371187	0.514213	0.523063	0.626735	0.369142	0.42181	0.568438	0.779994	0.525231		0.530622	0.0260259
45	0.585582	0.533261	0.538346	0.470838	0.877912	0.51271	0.437363	0.428769	0.722562	0.569173	0.403671	0.359944	0.450267	0.582104	0.661172	0.415459	0.36768	0.526472	0.525424	0.626684	0.357235	0.419643	0.544695	0.769766	0.52994		0.528667	0.0259854
46	0.623403	0.5025	0.524216	0.462565	0.871955	0.509648	0.428905	0.442016	0.737018	0.579649	0.405922	0.356705	0.460919	0.610493	0.658766	0.425273	0.382761	0.534544	0.536392	0.624168	0.357695	0.415714	0.51403	0.750369	0.529759		0.529815	0.0258551
47	0.62886	0.483931	0.547488	0.457122	0.860246	0.499649	0.425237	0.430249	0.761875	0.577249	0.401906	0.363295	0.473427	0.586522	0.705499	0.42372	0.391071	0.519184	0.562405	0.612314	0.358213	0.397175	0.512996	0.755733	0.525217		0.530423	0.0265446
48	0.604656	0.490747	0.536026	0.451723	0.853597	0.491137	0.424982	0.418701	0.763828	0.569571	0.400629	0.360367	0.485368	0.578158	0.667523	0.427382	0.403085	0.52099	0.561794	0.617211	0.364497	0.402863	0.524983	0.778072	0.536212		0.529364	0.026089
49	0.604963	0.503901	0.492117	0.453558	0.848956	0.492765	0.430003	0.414642	0.774881	0.549424	0.419742	0.362904	0.486683	0.593324	0.68258	0.409949	0.418769	0.515596	0.550789	0.614805	0.366843	0.425918	0.505595	0.744523	0.544486		0.528309	0.0254433
50	0.634108	0.487745	0.490138	0.459685	0.840842	0.486109	0.437041	0.417169	0.76349	0.563392	0.441972	0.36993	0.463068	0.584615	0.664348	0.420237	0.404331	0.506593	0.522333	0.629876	0.375158	0.422078	0.505966	0.712767	0.518841		0.524873	0.0245319
51	0.599501	0.471368	0.536479	0.455156	0.828174	0.476523	0.432604	0.424562	0.825372	0.578275	0.437716	0.368001	0.440249	0.595142	0.615285	0.427829	0.390107	0.530674	0.528663	0.663945	0.379439	0.407154	0.517333	0.735195	0.512448		0.527088	0.0257638
52	0.565799	0.457181	0.504238	0.450229	0.814394	0.470197	0.425225	0.436647	0.811102	0.603368	0.446744	0.361946	0.444184	0.587607	0.560885	0.449364	0.390462	0.552815	0.495985	0.688796	0.387804	0.405609	0.497736	0.712279	0.50405		0.520986	0.0248475
53	0.556467	0.445883	0.514096	0.419411	0.806654	0.468428	0.409716	0.442159	0.776991	0.578579	0.448921	0.35478	0.448375	0.566778	0.57202	0.470374	0.403691	0.558245	0.524431	0.638687	0.38898	0.393977	0.48757	0.712739	0.487572		0.515021	0.0236332
54	0.533814	0.439028	0.497683	0.405327	0.803493	0.473196	0.411711	0.437187	0.77191	0.588729	0.448997	0.346404	0.433657	0.577844	0.568684	0.487794	0.387544	0.55009	0.528376	0.611112	0.391334	0.397569	0.493142	0.687024	0.506219		0.511115	0.0232489
55	0.53449	0.441295	0.502112	0.412223	0.798563	0.479973	0.413102	0.438528	0.8061	0.580011	0.451297	0.352216	0.456429	0.58327	0.549333	0.495572	0.37028	0.538723	0.517084	0.621057	0.384684	0.401027	0.482806	0.679696	0.530094		0.512799	0.0236142
56	0.557481	0.45432	0.494237	0.414029	0.791365	0.476502	0.423868	0.432719	0.758569	0.580769	0.471505	0.351402	0.480348	0.570435	0.580044	0.513913	0.373597	0.561953	0.505076	0.643778	0.381029	0.407143	0.472071	0.675879	0.513911		0.515438	0.0225849
57	0.547401	0.466004	0.507875	0.413361	0.785035	0.464503	0.418519	0.450101	0.749332	0.586064	0.472836	0.347313	0.490644	0.571021	0.575833	0.530235	0.382967	0.530342	0.503127	0.681821	0.3802	0.402429	0.482955	0.650722	0.522231		0.516515	0.0222211
58	0.538483	0.485344	0.511484	0.417977	0.785493	0.472089	0.418627	0.47061	0.725831	0.587843	0.492795	0.349494	0.496204	0.571007	0.574951	0.535154	0.373201	0.53742	0.48887	0.673104	0.381296	0.407708	0.48614	0.639814	0.505546		0.51706	0.0213825
59	0.565343	0.475823	0.495368	0.410435	0.795569	0.477696	0.435394	0.461255	0.719123	0.58846	0.516099	0.338478	0.500071	0.544617	0.57617	0.546151	0.362968	0.564111	0.446256	0.700118	0.383957	0.410923	0.477359	0.645846	0.487174		0.516991	0.0223792
60	0.581163	0.447744	0.484056	0.413096	0.807866	0.480543	0.440781	0.497229	0.72507	0.585201	0.504731	0.346161	0.555942	0.545463	0.581968	0.530497	0.371898	0.546886	0.431706	0.688333	0.378466	0.409144	0.474989	0.639044	0.505315		0.518932	0.0224738
61	0.587525	0.464995	0.461863	0.413925	0.822596	0.47901	0.438889	0.502756	0.749384	0.575657	0.521792	0.350241	0.523671	0.568326	0.599932	0.516167	0.382026	0.526813	0.410934	0.684388	0.382728	0.40702	0.481616	0.634861	0.502524		0.519586	0.0231014
62	0.661624	0.46298	0.449903	0.43723	0.833763	0.498306	0.429396	0.490431	0.66574	0.579647	0.538556	0.341622	0.499866	0.57901	0.631348	0.481498	0.380036	0.51592	0.413558	0.652075	0.383563	0.40045	0.481779	0.610616	0.495937		0.516594	0.0226955
63	0.634476	0.457492	0.451687	0.418648	0.840802	0.477068	0.435544	0.489133	0.654099	0.571434	0.527307	0.336751	0.481705	0.567648	0.644981	0.47336	0.379894	0.508169	0.399448	0.605977	0.386071	0.384755	0.46959	0.624205	0.492797		0.508522	0.0227067
64	0.571246	0.485534	0.433486	0.394963	0.849478	0.471444	0.435876	0.4786	0.650222	0.551501	0.51576	0.342801	0.469261	0.575834	0.627102	0.475595	0.399473	0.535372	0.427703	0.599993	0.383809	0.388447	0.462744	0.657443	0.47726		0.506438	0.0223633
65	0.578305	0.466919	0.430944	0.406024	0.858655	0.467581	0.429195	0.467637	0.646384	0.548159	0.49103	0.355144	0.444896	0.591398	0.616773	0.471887	0.427567	0.553397	0.434869	0.612735	0.37965	0.404938	0.455107	0.665122	0.467456		0.506871	0.0225436
66	0.595463	0.470877	0.418796	0.412552	0.866226	0.470106	0.421771	0.466569	0.642224	0.553287	0.471296	0.364065	0.442512	0.588696	0.625037	0.451803	0.431554	0.539816	0.42099	0.613347	0.392597	0.401309	0.453466	0.660812	0.480426		0.506224	0.0228046
67	0.607972	0.468021	0.411977	0.414199	0.871026	0.466569	0.428879	0.474839	0.653451	0.568286	0.457855	0.374339	0.441359	0.603941	0.646942	0.445091	0.423454	0.519196	0.405276	0.586227	0.405605	0.391605	0.456051	0.624082	0.48306		0.505172	0.0229901
68	0.647976	0.440665	0.426915	0.415187	0.874964	0.474519	0.436179	0.47138	0.668877	0.55507	0.467446	0.407024	0.46607	0.571975	0.667916	0.456559	0.43478	0.498445	0.410108	0.568725	0.389276	0.39247	0.464535	0.611834	0.467844		0.50747	0.022951
69	0.622172	0.449496	0.433892	0.420638	0.882589	0.471259	0.44734	0.468842	0.635234	0.545479	0.457134	0.404914	0.459002	0.541742	0.690291	0.449201	0.450772	0.499499	0.385385	0.55396	0.384599	0.393989	0.467123	0.608787	0.46511		0.503538	0.0227078
70	0.600467	0.464574	0.433028	0.434509	0.892493	0.473643	0.447548	0.475488	0.629274	0.545701	0.436574	0.423866	0.439022	0.497657	0.673662	0.434491	0.466871	0.466003	0.381318	0.519916	0.381193	0.403979	0.495436	0.609386	0.449961		0.499042	0.0223439
71	0.608624	0.48	0.44908	0.423696	0.900568	0.470825	0.456766	0.488147	0.626456	0.538184	0.426347	0.41571	0.417246	0.510104	0.68173	0.444847	0.470873	0.472542	0.379939	0.504837	0.374561	0.394939	0.49274	0.590982	0.44731		0.498682	0.0227597
72	0.628896	0.475195	0.44618	0.394223	0.905403	0.467032	0.455432	0.482368	0.61663	0.541498	0.433156	0.415764	0.434668	0.515282	0.648317	0.459661	0.447624	0.491494	0.383041	0.50669	0.373702	0.388667	0.49859	0.606486	0.447461		0.498538	0.0228401
73	0.644285	0.471429	0.452401	0.392144	0.912366	0.467482	0.448863	0.471023	0.637924	0.554432	0.426754	0.423267	0.426568	0.558685	0.630454	0.464142	0.441879	0.496996	0.392401	0.484988	0.371374	0.380872	0.496258	0.624001	0.442025		0.500521	0.023634
74	0.668966	0.47665	0.473222	0.415878	0.928732	0.474973	0.446249	0.459225	0.680048	0.57284	0.408671	0.399664	0.459704	0.532304	0.62482	0.470392	0.439198	0.484789	0.401778	0.518956	0.372587	0.384878	0.508995	0.632449	0.440515		0.507059	0.0246465
75	0.659442	0.451624	0.459812	0.447983	0.949001	0.481733	0.453159	0.471104	0.663594	0.566182	0.410353	0.385513	0.454249	0.529877	0.646108	0.475067	0.435017	0.463551	0.396121	0.518807	0.378118	0.364885	0.518023	0.644038	0.446958		0.506813	0.025391
76	0.611027	0.454721	0.498099	0.454044	0.963838	0.494488	0.461234	0.482902	0.719518	0.532414	0.396005	0.367119	0.45482	0.541891	0.646809	0.467881	0.442431	0.473698	0.40384	0.524511	0.384018	0.36181	0.521136	0.662115	0.452729		0.510924	0.0261386
77	0.624596	0.482106	0.509631	0.451444	0.967738	0.505297	0.46561	0.470953	0.709475	0.527147	0.397628	0.367411	0.451598	0.556658	0.636192	0.480446	0.443172	0.501737	0.41378	0.53415	0.386708	0.374233	0.517062	0.658669	0.468156		0.516064	0.0257165
78	0.652723	0.484979	0.515661	0.458628	0.962406	0.517982	0.467002	0.459155	0.751023	0.53552	0.440554	0.351573	0.445053	0.536337	0.623469	0.496615	0.430156	0.525014	0.435838	0.549501	0.389337	0.391607	0.512975	0.644567	0.454516		0.521288	0.0258107
79	0.718015	0.478197	0.513874	0.451795	0.957112	0.527481	0.472457	0.448032	0.693968	0.549276	0.42997	0.340633	0.442601	0.509876	0.622326	0.512368	0.438443	0.511441	0.404628	0.559672	0.392212	0.412445	0.514477	0.632881	0.468022		0.520088	0.0257298
80	0.73587	0.483473	0.512674	0.432585	0.951886	0.539017	0.477219	0.448381	0.704792	0.529652	0.449245	0.333359	0.449434	0.501158	0.646845	0.533126	0.453375	0.512356	0.389023	0.557326	0.393065	0.411902	0.561332	0.620803	0.481635		0.524381	0.0261042
81	0.731608	0.507796	0.556563	0.42754	0.952924	0.554355	0.478866	0.450507	0.716896	0.536523	0.4578	0.336143	0.460181	0.484727	0.634283	0.547303	0.472129	0.511833	0.39983	0.554521	0.395483	0.418024	0.58435	0.604441	0.488523		0.530526	0.0257768
82	0.747534	0.525941	0.564165	0.431874	0.954522	0.569552	0.474052	0.458937	0.689502	0.531719	0.464554	0.329513	0.442156	0.488515	0.620606	0.565987	0.484802	0.505052	0.436384	0.566442	0.399827	0.441274	0.56876	0.587072	0.502745		0.53406	0.0251537
83	0.73737	0.520531	0.554904	0.441313	0.954344	0.58879	0.481671	0.456826	0.694028	0.525806	0.469957	0.317821	0.440746	0.506471	0.674536	0.577075	0.48903	0.516942	0.437756	0.547058	0.409141	0.444823	0.541742	0.605683	0.510276		0.537786	0.025404
84	0.769032	0.527666	0.540894	0.460759	0.957343	0.61128	0.474362	0.454435	0.67706	0.542044	0.480257	0.317183	0.466049	0.50925	0.69335	0.569289	0.493434	0.526662	0.435886	0.577098	0.41159	0.450719	0.53575	0.619309	0.51386		0.544582	0.0257571
85	0.776124	0.542943	0.551192	0.455887	0.968354	0.632638	0.477927	0.452409	0.630382	0.540391	0.455817	0.318082	0.45974	0.503423	0.730861	0.567952	0.479752	0.531229	0.455702	0.556514	0.40165	0.460255	0.550576	0.621101	0.53162		0.546101	0.0264091
86	0.766433	0.541761	0.601908	0.445296	0.97695	0.644674	0.485128	0.440879	0.605637	0.524803	0.456764	0.327641	0.452939	0.509414	0.705487	0.555162	0.481827	0.505416	0.45347	0.545897	0.390817	0.473801	0.592913	0.583255	0.53242		0.544028	0.0262854
87	0.738447	0.553628	0.640285	0.437748	0.982213	0.646901	0.50537	0.423627	0.595933	0.521492	0.46473	0.340381	0.414752	0.511059	0.656753	0.537972	0.475094	0.510641	0.474388	0.55739	0.390246	0.495366	0.612884	0.592648	0.546374		0.545053	0.0259015
88	0.715863	0.581667	0.67865	0.437584	0.990008	0.640674	0.518587	0.414518	0.582987	0.513852	0.442283	0.367902	0.425069	0.534532	0.652836	0.547809	0.485906	0.541143	0.502165	0.567905	0.388428	0.508577	0.626069	0.601044	0.548473		0.552581	0.0256678
89	0.748494	0.625938	0.68216	0.432634	0.997872	0.613924	0.518632	0.4183	0.605939	0.505963	0.446792	0.38491	0.425017	0.546922	0.645614	0.539404	0.483821	0.53761	0.488178	0.578513	0.396841	0.536758	0.659961	0.622388	0.574014		0.560664	0.0263039
90	0.724109	0.636683	0.665754	0.437233	1	0.606793	0.529941	0.42104	0.581199	0.510609	0.452717	0.392903	0.446201	0.559184	0.630955	0.524319	0.458341	0.521695	0.499125	0.578262	0.422355	0.553338	0.698166	0.631691	0.626022		0.564345	0.0258069
91	0.723994	0.640269	0.683896	0.425179	0.994043	0.592244	0.528826	0.44296	0.61783	0.50923	0.461313	0.392512	0.459405	0.557827	0.650434	0.533144	0.460226	0.528389	0.569025	0.614082	0.432229	0.584951	0.728962	0.631704	0.690771		0.578138	0.0260505
92	0.754237	0.624393	0.698732	0.429369	0.983126	0.578097	0.529602	0.435048	0.599839	0.499318	0.477024	0.375459	0.446825	0.554423	0.617791	0.550108	0.441435	0.535411	0.584237	0.638738	0.442325	0.593089	0.744351	0.622807	0.68406		0.577594	0.0264117
93	0.74311	0.623108	0.7532	0.43355	0.975704	0.566503	0.527623	0.432609	0.585991	0.502889	0.483716	0.362526	0.464	0.55605	0.582702	0.559592	0.433169	0.500857	0.572591	0.64062	0.444748	0.597994	0.745197	0.642759	0.679813		0.576425	0.0267451
94	0.730193	0.657516	0.747284	0.437843	0.96938	0.554248	0.519727	0.424191	0.609084	0.509853	0.50367	0.361267	0.490052	0.599852	0.58109	0.560112	0.435948	0.480277	0.550772	0.651042	0.458824	0.616764	0.725826	0.655639	0.712159		0.581704	0.0265292
95	0.659568	0.657463	0.719939	0.437337	0.961716	0.543373	0.509615	0.418934	0.573307	0.5273	0.494012	0.373088	0.496068	0.628203	0.590445	0.581673	0.433294	0.493233	0.585599	0.695872	0.468008	0.633042	0.68902	0.683354	0.737269		0.583629	0.0257409
96	0.643715	0.645185	0.636289	0.469473	0.955664	0.530902	0.507397	0.408542	0.508819	0.555261	0.490589	0.394523	0.522607	0.610482	0.549373	0.599247	0.422052	0.512348	0.600091	0.734366	0.486972	0.673931	0.664093	0.696303	0.772086		0.583612	0.0252951
97	0.610233	0.64709	0.564188	0.494894	0.95274	0.527316	0.504662	0.385484	0.45937	0.603892	0.506665	0.402296	0.544299	0.633332	0.531911	0.59823	0.417235	0.513231	0.595908	0.722963	0.505238	0.681095	0.654972	0.705875	0.792081		0.582208	0.0255195
98	0.558272	0.626933	0.556624	0.50493	0.957463	0.526362	0.490806	0.375355	0.444834	0.606319	0.494171	0.403834	0.599212	0.685256	0.536651	0.607841	0.426883	0.521656	0.598604	0.70932	0.526945	0.694592	0.621021	0.745521	0.82341		0.585713	0.0265484
99	0.516551	0.580699	0.499061	0.517525	0.967657	0.522618	0.48124	0.380888	0.429431	0.620223	0.486841	0.410253	0.62529	0.704082	0.545023	0.597205	0.419781	0.558277	0.615963	0.739878	0.550509	0.70573	0.639743	0.753925	0.885097		0.59014	0.0286416
100	0.525695	0.559843	0.478954	0.55856	0.975446	0.526667	0.477152	0.374236	0.428312	0.640113	0.462636	0.420591	0.696021	0.835238	0.560111	0.596103	0.428806	0.549952	0.622593	0.722997	0.565055	0.708488	0.675921	0.717525	0.880766		0.599511	0.0300846
