# Supplementary material for: Concerted action of neuroepithelial basal shrinkage and active epithelial migration ensures efficient optic cup morphogenesis
Source: eLife. 2017 Apr 4;6:e22689. doi: 10.7554/eLife.22689 (PMC5380436; doi:10.7554/eLife.22689)
Supplement: Figure 2—source data 4. — DOI: http://dx.doi.org/10.7554/eLife.22689.013 [file elife-22689-fig2-data4.xlsx]

## Sheet: Sheet1
Figure 2- source data 4
	Angle of invagination									Mann-whitney test
Condition	DMSO	Rockout	HU+Aphi	Control	lamα1 Mo	opo Mo	ezrin Mo		Rockout vs DMSO			HU+Aphi vs Control
	58.5907	69.6643	69.725	63.216	122.478	97.366	90.2093		P value	0.0004		P value	0.0421
	55.6483	55.3257	63.0823	52.392	107.284	97.7637	64.6533		Exact or approximate P value?	Exact		Exact or approximate P value?	Exact
	69.1563	73.8957	60.7783	61.3907	130.939	70.7707	64.4057		P value summary	***		P value summary	*
	60.123	69.7903	66.963	78.565	94.1173	72.826	86.879		Significantly different? (P < 0.05)	Yes		Significantly different? (P < 0.05)	Yes
	73.0517	89.4287	64.827	67.6237	101.064	82.421	79.9677		One- or two-tailed P value?	Two-tailed		One- or two-tailed P value?	Two-tailed
	50.4893	82.315	77.089	76.595	122.371	52.2863	68.879		Sum of ranks in column E,F	133.0 , 302.0		Sum of ranks in column E,H	131.0 , 122.0
	56.9223	58.1343	65.5073	46.62	125.899	97.8137	80.4737		Mann-Whitney U	28		Mann-Whitney U	26
	53.8353	102.2	75.6097	56.9267	137.347	67.3083	68.2777
	69.197	90.3887		55.3813	141.896	87.812	85.1637		lamα1 Mo vs control			opo Mo vs control
	80.8587	104.674		51.616	104.771	75.9913	84.6573		P value	< 0.0001		P value	< 0.0001
	55.6657	87.221		55.514	104.048	93.7957	65.6927		Exact or approximate P value?	Exact		Exact or approximate P value?	Exact
	46.88	95.2403		50.751	93.9193	90.164			P value summary	****		P value summary	****
	63.7413	75.784		66.0963	97.1597	92.3933			Significantly different? (P < 0.05)	Yes		Significantly different? (P < 0.05)	Yes
	48.8967	60.4403		64.6167	98.916				One- or two-tailed P value?	Two-tailed		One- or two-tailed P value?	Two-tailed
		81.2417		58.7383	125.577				Sum of ranks in column A,B	210.0 , 570.0		Sum of ranks in column A,C	236.0 , 325.0
				59.4357	83.9017				Mann-Whitney U	0		Mann-Whitney U	26
				52.9983	109.331
				65.0443	97.0137				ezrin Mo vs control
				56.3993	95.579				P value	< 0.0001
				59.3943					Exact or approximate P value?	Exact
Mean	60.22	79.72	67.95	59.97	110.2	82.98	76.3		P value summary	****
Std deviation	9.846	15.41	5.821	8.215	16.69	14.19	9.969		Significantly different? (P < 0.05)	Yes
									One- or two-tailed P value?	Two-tailed
									Sum of ranks in column A,D	229.0 , 267.0
									Mann-Whitney U	19
