# Supplementary material for: Concerted action of neuroepithelial basal shrinkage and active epithelial migration ensures efficient optic cup morphogenesis
Source: eLife. 2017 Apr 4;6:e22689. doi: 10.7554/eLife.22689 (PMC5380436; doi:10.7554/eLife.22689)
Supplement: Figure 2—source data 5. — DOI: http://dx.doi.org/10.7554/eLife.22689.014 [file elife-22689-fig2-data5.xlsx]

## Sheet: Sheet1
Figure2 - source data 5
	Average RNE cell basal footprint (µm2)								Mann Whitney test
	Control 18ss	Control 21ss	Control 30ss	Rockout 18ss	Rockout 21ss	Rockout 30ss	30ssHU + Aphi		Control 30ss vs Rockout 30ss
	24.7142	8.14953	12.3698	23.1006	17.8122	10.7039	15.052		P value	0.0952
	17.9313	15.1655	10.8174	21.8148	20.4614	12.0361	12.267		Exact or approximate P value?	Exact
	25.3237	11.4837	9.76108	28.0179	12.4656	8.746	15.582		P value summary	ns
	25.1923	13.8499	9.35109	19.0091	11.8372	10.1103	11.963		Significantly different? (P < 0.05)	No
	19.7611	13.0329	12.1171	12.6918	9.82136	12.6379	19.366		One- or two-tailed P value?	Two-tailed
	15.3367	10.9896	9.33046	30.2879	10.0529	13.3799	14.993		Sum of ranks in column C,F	214.0 , 381.0
	31.8873	14.3439	12.8381	19.3712	15.716	9.664	14.969		Mann-Whitney U	94
	31.0736	10.1001	10.1103	22.9937	14.0984	11.274	16.891
	17.2777	11.4856	10.3286	16.7166	16.5441	9.661	13.507		Control 30ss vs 30ss HU+Aphi
		9.08975	8.2938	18.1092		10.6848	11.963		P value	< 0.0001
			8.73644	28.8457		7.84127			Exact or approximate P value?	Exact
			10.5203	24.0963		13.3309			P value summary	****
			11.1714	14.098		12.2433			Significantly different? (P < 0.05)	Yes
			9.48461			10.9478			One- or two-tailed P value?	Two-tailed
			9.55023			13.6545			Sum of ranks in column C,G	128.0 , 197.0
						11.1252			Mann-Whitney U	8
						11.0906
						11.4362
						10.4762
Mean	23.17	11.77	10.32	21.47	14.31	11.11	14.66
Std. Deviation	5.966	2.308	1.335	5.498	3.621	1.553	2.356
