# Supplementary material for: Concerted action of neuroepithelial basal shrinkage and active epithelial migration ensures efficient optic cup morphogenesis
Source: eLife. 2017 Apr 4;6:e22689. doi: 10.7554/eLife.22689 (PMC5380436; doi:10.7554/eLife.22689)
Supplement: Figure 3—source data 1. — DOI: http://dx.doi.org/10.7554/eLife.22689.018 [file elife-22689-fig3-data1.xlsx]

## Sheet: Sheet1
Figure 3- source data 1
Control	Avg. Number of actin based protrusions observed per hour
Cell	Leading edge	Trailing edge
1	1.67	0.5
2	1.5	0.33
3	1.33	0
4	3.33	1.55
5	4	1.43
6	3.43	2
7	2.8	1.2
8	2.8	0.4
9	1.67	0.33
Rockout	Avg. Number of actin based protrusions observed per hour
Cell	Leading edge	Trailing edge
1	2.8	1.6
2	3.89	1.39
3	2.37	0.65
4	3.67	2
5	3.09	1.82
6	4.5	1.5
