# Supplementary material for: Concerted action of neuroepithelial basal shrinkage and active epithelial migration ensures efficient optic cup morphogenesis
Source: eLife. 2017 Apr 4;6:e22689. doi: 10.7554/eLife.22689 (PMC5380436; doi:10.7554/eLife.22689)
Supplement: Figure 4—source data 1. — DOI: http://dx.doi.org/10.7554/eLife.22689.029 [file elife-22689-fig4-data1.xlsx]

## Sheet: Sheet1
Figure 4-source data 1
Control embryo number	Avg integrine signal at basal side	Avg integrin signal in middle region of RNE	ratio
1	452.013	322.809	1.40025
2	382.913	294.869	1.29859
3	434.667	331.199	1.3124
4	363.394	299.368	1.21387
5	668.074	502.095	1.33057
opo MO embryo number	Avg integrine signal at basal side	Avg integrin signal in middle region of RNE	ratio
1	324.845	307.431	1.05665
2	322.003	299.977	1.07343
3	349.357	329.583	1.06
4	305.04	294.548	1.03562
5	335.936	301.125	1.1156
