# Supplementary material for: Concerted action of neuroepithelial basal shrinkage and active epithelial migration ensures efficient optic cup morphogenesis
Source: eLife. 2017 Apr 4;6:e22689. doi: 10.7554/eLife.22689 (PMC5380436; doi:10.7554/eLife.22689)
Supplement: Figure 4—source data 2. — DOI: http://dx.doi.org/10.7554/eLife.22689.030 [file elife-22689-fig4-data2.xlsx]

## Sheet: Sheet1
Figure 4-source data 2
	Migration speed of rim cells in µm/min						Mann-Whitney test
condition	control	lamα1 Mo	opo Mo	ezrin Mo
	0.326	0.425	0.451	0.32			Control vs lamα1 MO			Control vs Opo Mo
	0.466	0.265	0.377	0.389			P value	0.0004		P value	0.0176
	0.415	0.19	0.471	0.336			Exact or approximate P value?	Exact		Exact or approximate P value?	Exact
	0.336	0.119	0.368	0.287			P value summary	***		P value summary	*
	0.55	0.294	0.214	0.382			Significantly different? (P < 0.05)	Yes		Significantly different? (P < 0.05)	Yes
	0.546	0.327	0.415	0.382			One- or two-tailed P value?	Two-tailed		One- or two-tailed P value?	Two-tailed
	0.417	0.407	0.291	0.316			Sum of ranks in column A,B	254.0 , 46.00		Sum of ranks in column A,C	260.5 , 90.50
	0.458	0.328	0.401	0.36			Mann-Whitney U	10		Mann-Whitney U	35.5
	0.372		0.455	0.37
	0.559		0.381	0.253
	0.576			0.32			Control vs ezrin Mo
	0.543			0.222			P value	< 0.0001
	0.435			0.29			Exact or approximate P value?	Exact
	0.488			0.306			P value summary	****
	0.489			0.371			Significantly different? (P < 0.05)	Yes
	0.47			0.363			One- or two-tailed P value?	Two-tailed
				0.381			Sum of ranks in column A,D	456.5 , 284.5
				0.322			Mann-Whitney U	31.5
				0.347
				0.385
				0.387
				0.35
Mean	0.4654	0.2944	0.3824	0.3381
Std. Deviation	0.07854	0.1031	0.07901	0.04597
