# Supplementary material for: Concerted action of neuroepithelial basal shrinkage and active epithelial migration ensures efficient optic cup morphogenesis
Source: eLife. 2017 Apr 4;6:e22689. doi: 10.7554/eLife.22689 (PMC5380436; doi:10.7554/eLife.22689)
Supplement: Figure 4—source data 3. — DOI: http://dx.doi.org/10.7554/eLife.22689.031 [file elife-22689-fig4-data3.xlsx]

## Sheet: Control
Figure 4-source data 3
Normalised average intensity distribution : phalloidin - Control
Basal to apical position in RNE	section 1	section 2	section 3	section 4	section 5	section 6	section 7	section 8	section 9	section 10	section 11	section 12	section 13	section 14	section 15	section 16	section 17	section 18	section 19	section 20	section 21	section 22	section 23	section 24	section 25		Mean	SEM
1	0.542271	0.663898	0.736935	0.655505	0.677261	0.64634	0.40771	0.951777	0.757791	0.662343	0.80006	0.740956	0.9287	0.976145	0.50212	0.756276	0.840316	0.846726	0.612113	0.530419	0.637103	0.640489	0.71596	0.696151	0.760692		0.707442	0.0275936
2	0.635866	0.74254	0.755821	0.728401	0.711755	0.875294	0.482387	1	0.842433	0.792038	0.828207	0.754559	0.898217	1	0.57536	0.852733	0.998667	0.988537	0.708982	0.591954	0.716056	0.703796	0.749186	0.799747	0.795692		0.781129	0.0269522
3	0.724127	0.792311	0.755671	0.789637	0.749486	1	0.558506	0.95921	0.870625	0.896804	0.848175	0.741192	0.852279	0.994005	0.677233	0.854858	1	1	0.803923	0.685756	0.812936	0.765051	0.796198	0.949486	0.825585		0.828122	0.0227449
4	0.815126	0.83182	0.783318	0.84813	0.79072	0.986939	0.648518	0.924357	0.867425	0.953281	0.882721	0.722964	0.828131	0.989536	0.710807	0.885237	0.965335	0.956511	0.914089	0.777928	0.875226	0.815404	0.851869	1	0.863243		0.859545	0.0182261
5	0.867181	0.839438	0.813623	0.904567	0.846192	0.974616	0.790161	0.87603	0.856149	0.977297	0.903265	0.716565	0.800365	0.993889	0.717109	0.915523	0.962731	0.907088	0.974921	0.832352	0.890266	0.849541	0.909917	0.953186	0.88109		0.878123	0.0150251
6	0.904231	0.880565	0.851306	0.94852	0.870829	0.96857	0.939394	0.796748	0.862005	0.990497	0.91869	0.708161	0.776034	0.988456	0.733339	0.905099	0.981119	0.902908	0.980301	0.855655	0.893848	0.871317	0.966967	0.888595	0.891592		0.89099	0.0152307
7	0.932942	0.915772	0.892746	0.983745	0.879156	0.943778	0.99169	0.747113	0.887553	0.995029	0.952907	0.687254	0.758577	0.977438	0.766029	0.943292	0.966057	0.924643	0.985241	0.903921	0.889502	0.876718	0.982118	0.851119	0.916136		0.902019	0.0167229
8	0.9551	0.933495	0.951094	0.99153	0.876033	0.907825	1	0.719025	0.875607	0.989112	0.976974	0.664455	0.761179	0.948299	0.819865	0.959386	0.959498	0.905194	0.988095	0.933172	0.889137	0.89901	0.978604	0.818298	0.921325		0.904852	0.0175734
9	0.975161	0.973172	0.977627	1	0.883143	0.896655	0.963364	0.702173	0.834347	0.998358	0.988351	0.647563	0.762087	0.936305	0.892794	0.975693	0.964019	0.866623	0.98616	0.960349	0.90867	0.920849	0.995781	0.830399	0.925801		0.910618	0.0187422
10	0.985903	0.98488	0.994548	0.998695	0.901989	0.885763	0.943064	0.678214	0.813827	1	0.977962	0.644601	0.754649	0.935586	0.933401	0.967404	0.973121	0.855168	0.981775	0.967426	0.92664	0.928941	1	0.854187	0.946544		0.913372	0.0196312
11	0.985645	1	0.994196	0.983501	0.915269	0.850459	0.907062	0.667254	0.829243	0.982197	0.982326	0.646232	0.744564	0.914237	0.939674	0.96896	0.951541	0.843442	1	1	0.954422	0.913837	0.996548	0.88267	0.950134		0.912136	0.0200491
12	0.986738	0.989707	0.997856	0.962863	0.908165	0.810478	0.874185	0.664972	0.870491	0.935471	0.975413	0.642574	0.723575	0.88201	0.939977	0.954732	0.920545	0.820085	0.983726	0.998969	0.990592	0.897562	0.99707	0.923095	0.955535		0.904255	0.0203152
13	1	0.982014	1	0.943266	0.913105	0.786991	0.852381	0.663133	0.898389	0.895556	0.946048	0.639362	0.70622	0.853586	0.943145	1	0.900738	0.803375	0.977228	0.996439	0.997153	0.888068	0.988296	0.959236	0.950528		0.89937	0.021197
14	0.97927	0.994045	0.986648	0.949528	0.897064	0.804032	0.793023	0.661921	0.961142	0.885436	0.933973	0.635047	0.677298	0.841896	0.969149	0.991023	0.88272	0.791002	0.958248	0.948291	0.999897	0.889384	0.961784	0.963646	0.937004		0.891699	0.021575
15	0.968094	0.96274	0.968438	0.956773	0.899818	0.796504	0.76563	0.653742	0.997837	0.875362	0.94949	0.611972	0.661449	0.833192	0.982073	0.937594	0.852866	0.774987	0.915854	0.934626	1	0.907093	0.925767	0.958574	0.940853		0.881253	0.0222608
16	0.958577	0.958387	0.933582	0.948381	0.912402	0.772817	0.741796	0.649806	0.971269	0.877319	0.974755	0.587605	0.643907	0.821755	0.991001	0.900293	0.821091	0.755386	0.865244	0.931786	0.984312	0.940471	0.921651	0.942566	0.964267		0.870817	0.0233184
17	0.945878	0.972279	0.908399	0.912833	0.920541	0.75814	0.727185	0.637599	0.954418	0.882113	0.986982	0.577934	0.645004	0.791761	0.987035	0.890559	0.798382	0.728979	0.806183	0.93365	0.941778	0.983526	0.929774	0.949541	0.984482		0.862198	0.0244537
18	0.939893	0.983279	0.846296	0.86165	0.935841	0.760775	0.715315	0.621289	0.910395	0.865564	0.991826	0.56823	0.643359	0.773677	0.980359	0.884239	0.782272	0.701057	0.791559	0.961442	0.910412	0.996479	0.920439	0.962078	0.987134		0.851794	0.0253582
19	0.942196	0.99421	0.809488	0.838269	0.952326	0.752929	0.708835	0.585211	0.871711	0.849271	0.990877	0.557302	0.628289	0.771469	0.99607	0.878898	0.757371	0.67494	0.782904	0.97981	0.877257	1	0.898019	0.941702	1		0.841574	0.0270726
20	0.903462	0.992622	0.78246	0.805318	0.943401	0.730715	0.715525	0.57166	0.887595	0.824092	1	0.553937	0.602627	0.790771	1	0.892048	0.710047	0.649996	0.768865	0.958831	0.858875	0.993954	0.897414	0.906664	0.996529		0.829496	0.0278302
21	0.887705	0.982427	0.763003	0.773125	0.918095	0.714153	0.70299	0.577611	0.937607	0.824591	0.988016	0.534569	0.588317	0.811241	0.964611	0.89416	0.684086	0.628342	0.741245	0.929034	0.849362	0.976936	0.891866	0.895389	0.981966		0.817618	0.0279621
22	0.865606	0.952146	0.719989	0.750858	0.887616	0.690718	0.726063	0.58161	0.996049	0.824381	0.978332	0.513499	0.551831	0.814868	0.934661	0.872403	0.66194	0.605333	0.713685	0.909234	0.834753	0.973895	0.875978	0.883695	0.96109		0.803209	0.0286765
23	0.834544	0.922695	0.70022	0.719667	0.871887	0.679091	0.741199	0.571867	1	0.802165	0.962498	0.505355	0.540528	0.79774	0.898083	0.83546	0.651781	0.589423	0.68092	0.898285	0.8308	0.977074	0.843822	0.895222	0.93938		0.787588	0.0285306
24	0.830206	0.90507	0.69172	0.704948	0.871711	0.682036	0.732422	0.558048	0.997056	0.784413	0.951008	0.49987	0.528327	0.77205	0.902959	0.826237	0.634937	0.583133	0.658542	0.884732	0.813648	0.965332	0.827068	0.90393	0.933172		0.777703	0.0288253
25	0.82841	0.902596	0.687863	0.695344	0.904589	0.669405	0.726393	0.549347	0.988647	0.768291	0.948465	0.489017	0.506578	0.753616	0.907558	0.831688	0.625415	0.579072	0.640946	0.855019	0.811574	0.932493	0.826527	0.898689	0.914663		0.769688	0.0292458
26	0.790648	0.882818	0.707887	0.677481	0.962896	0.67135	0.726163	0.556227	0.986694	0.762269	0.926467	0.481757	0.496153	0.734619	0.885833	0.825186	0.606113	0.578915	0.613795	0.832115	0.806853	0.913373	0.809363	0.87018	0.909235		0.760575	0.0291467
27	0.762605	0.860063	0.708017	0.666645	1	0.663092	0.706791	0.564149	0.958166	0.762407	0.88913	0.468546	0.495938	0.73985	0.85087	0.81082	0.588444	0.578163	0.596046	0.82701	0.824693	0.890622	0.771411	0.826582	0.900419		0.748419	0.0285053
28	0.740212	0.851638	0.683613	0.62523	0.977539	0.635834	0.690559	0.559682	0.938908	0.742377	0.872171	0.459112	0.489693	0.738967	0.820927	0.769534	0.566217	0.566727	0.604769	0.816575	0.833882	0.864432	0.738761	0.77478	0.878373		0.729621	0.0277909
29	0.733212	0.848066	0.653323	0.616021	0.957406	0.615734	0.676629	0.544343	0.90773	0.713626	0.832558	0.450572	0.470286	0.735863	0.769483	0.757553	0.56452	0.547321	0.604038	0.795625	0.837611	0.857564	0.719014	0.743979	0.87033		0.712896	0.0272837
30	0.712696	0.828115	0.642971	0.592542	0.948165	0.595782	0.647921	0.527441	0.894677	0.712976	0.829233	0.451099	0.455985	0.723174	0.71161	0.74406	0.549946	0.537364	0.584517	0.765282	0.828869	0.830195	0.702431	0.727932	0.867625		0.696504	0.0271995
31	0.702307	0.789044	0.63854	0.571897	0.91081	0.576701	0.620884	0.528383	0.909656	0.718197	0.833886	0.444161	0.445021	0.712711	0.702674	0.746943	0.544346	0.525747	0.554388	0.746298	0.830996	0.805942	0.684722	0.694872	0.85009		0.683569	0.0271075
32	0.690643	0.763124	0.60864	0.553646	0.897348	0.560172	0.589574	0.523493	0.90255	0.759846	0.851866	0.433107	0.440517	0.699012	0.719935	0.734082	0.535005	0.528357	0.535645	0.739532	0.817792	0.778212	0.660555	0.645585	0.825275		0.671741	0.027355
33	0.663338	0.736132	0.585685	0.550732	0.89448	0.552698	0.577548	0.510351	0.891245	0.798907	0.844999	0.412486	0.445397	0.668299	0.725642	0.74234	0.523284	0.520451	0.52283	0.729165	0.806623	0.743358	0.644987	0.62115	0.804577		0.660668	0.0276063
34	0.630998	0.705944	0.575395	0.548834	0.878783	0.541903	0.59056	0.491982	0.834437	0.796635	0.818879	0.414224	0.453288	0.630331	0.740798	0.748297	0.512962	0.513514	0.521687	0.720165	0.796702	0.718223	0.633709	0.619564	0.777304		0.648605	0.0261648
35	0.614664	0.706892	0.567527	0.540871	0.84518	0.527902	0.588715	0.486218	0.78468	0.792708	0.800481	0.428834	0.439535	0.584231	0.737423	0.746231	0.514909	0.516329	0.510165	0.701129	0.800832	0.69488	0.626594	0.625605	0.729673		0.636488	0.0247771
36	0.605231	0.731457	0.536376	0.529817	0.81835	0.516723	0.589627	0.482609	0.748883	0.789871	0.796665	0.439751	0.427833	0.557432	0.711744	0.769333	0.533666	0.508132	0.491534	0.689927	0.806853	0.676155	0.619426	0.637309	0.697211		0.628477	0.0245695
37	0.605279	0.735765	0.52128	0.522401	0.792539	0.514728	0.589705	0.473898	0.70923	0.775397	0.777169	0.438672	0.418899	0.542489	0.672354	0.769744	0.540626	0.504861	0.4919	0.692438	0.7999	0.667342	0.606003	0.644577	0.659651		0.618674	0.0236452
38	0.595147	0.742914	0.503087	0.496075	0.756601	0.498488	0.579964	0.463953	0.718035	0.741353	0.742684	0.419696	0.409407	0.518785	0.666786	0.740642	0.544409	0.498336	0.473952	0.68764	0.779361	0.65296	0.603272	0.632948	0.625212		0.603668	0.0231548
39	0.587177	0.730142	0.486053	0.481461	0.713325	0.467424	0.564509	0.438768	0.72946	0.696998	0.727022	0.406717	0.400752	0.486149	0.639345	0.71504	0.533968	0.490016	0.453616	0.67337	0.757445	0.648338	0.592245	0.608837	0.609237		0.585497	0.0228865
40	0.594454	0.705862	0.474906	0.463651	0.692714	0.443002	0.564	0.410748	0.731224	0.648487	0.705569	0.402386	0.393862	0.461643	0.620755	0.698004	0.524229	0.484115	0.434145	0.656766	0.738756	0.652706	0.56992	0.57192	0.599422		0.56973	0.0226565
41	0.59909	0.707598	0.457896	0.455207	0.679908	0.416021	0.573621	0.394418	0.727823	0.605019	0.680207	0.397948	0.391394	0.428777	0.584855	0.688038	0.53738	0.471903	0.4303	0.647678	0.71765	0.647333	0.551134	0.549075	0.602971		0.55773	0.0226631
42	0.567353	0.721811	0.44388	0.454653	0.663733	0.408257	0.574669	0.387193	0.724668	0.568164	0.670951	0.396677	0.385711	0.400886	0.583913	0.663751	0.535674	0.468179	0.420555	0.651409	0.699991	0.634044	0.535891	0.543781	0.60031		0.548244	0.0226861
43	0.546405	0.6947	0.439706	0.444212	0.647394	0.404714	0.567733	0.382079	0.707407	0.550117	0.654882	0.389975	0.378363	0.383573	0.595294	0.64516	0.508025	0.474318	0.407151	0.619193	0.680244	0.605946	0.528785	0.531783	0.615087		0.53609	0.0218335
44	0.517904	0.65312	0.436683	0.43097	0.622463	0.411369	0.561542	0.374003	0.67802	0.524072	0.623741	0.373909	0.370194	0.368329	0.598225	0.630773	0.498213	0.474746	0.410166	0.599782	0.655834	0.596397	0.519341	0.516486	0.630322		0.523064	0.0206579
45	0.489116	0.619429	0.437166	0.424009	0.603193	0.418077	0.541425	0.359729	0.66379	0.49651	0.603667	0.371913	0.371308	0.3545	0.583746	0.624773	0.487142	0.473755	0.411578	0.568086	0.63785	0.575119	0.514231	0.496886	0.631833		0.510353	0.0195801
46	0.472143	0.573249	0.440693	0.411558	0.589327	0.411382	0.505329	0.354399	0.647953	0.452996	0.582825	0.369702	0.381489	0.35346	0.556209	0.631672	0.480147	0.470823	0.404137	0.561365	0.629433	0.573785	0.508705	0.481922	0.622109		0.498672	0.0187155
47	0.470073	0.526851	0.440414	0.399489	0.57761	0.414598	0.470455	0.349602	0.628331	0.420317	0.571994	0.367036	0.382721	0.358635	0.531954	0.637666	0.475719	0.470061	0.394834	0.555923	0.612077	0.585454	0.500216	0.468106	0.590026		0.488006	0.0179134
48	0.447184	0.523555	0.450444	0.393503	0.565196	0.417397	0.455508	0.34973	0.623388	0.405883	0.563204	0.360259	0.385561	0.357054	0.527877	0.6291	0.462773	0.471243	0.393376	0.535602	0.602474	0.589004	0.508745	0.446176	0.552001		0.480649	0.0173658
49	0.433885	0.522224	0.45899	0.381579	0.548964	0.411106	0.439612	0.348508	0.615761	0.390319	0.55314	0.359372	0.389664	0.351752	0.506758	0.623201	0.447048	0.466657	0.391475	0.507621	0.600336	0.586516	0.503887	0.434921	0.517329		0.471625	0.0169607
50	0.424496	0.513891	0.447435	0.374652	0.532387	0.40041	0.422542	0.343056	0.614481	0.387074	0.54179	0.3628	0.389968	0.353824	0.503806	0.607661	0.433291	0.47257	0.386985	0.481034	0.577534	0.571349	0.500368	0.433662	0.483709		0.462431	0.0161396
51	0.421187	0.499769	0.438244	0.359946	0.511083	0.423647	0.406635	0.33415	0.603295	0.372633	0.523724	0.360499	0.395083	0.357262	0.48279	0.631909	0.439045	0.464844	0.383323	0.455568	0.562493	0.54202	0.4939	0.439029	0.470939		0.454921	0.0156958
52	0.417379	0.475311	0.430955	0.345537	0.486379	0.436634	0.387211	0.331256	0.580603	0.369297	0.514493	0.361459	0.408577	0.355412	0.46958	0.597605	0.439846	0.460366	0.380746	0.442126	0.552633	0.526526	0.476015	0.434851	0.467564		0.445934	0.0143287
53	0.415745	0.468709	0.407418	0.336678	0.474198	0.448872	0.358858	0.33116	0.560603	0.355434	0.512467	0.366863	0.412935	0.357037	0.451689	0.571504	0.421844	0.464697	0.377744	0.437977	0.545149	0.493144	0.462848	0.426939	0.429801		0.435612	0.0134899
54	0.42061	0.475147	0.379151	0.331866	0.455661	0.459095	0.341861	0.333156	0.58377	0.342221	0.506729	0.369043	0.420635	0.361455	0.439242	0.56437	0.399307	0.472305	0.37978	0.429752	0.537223	0.460417	0.466272	0.414894	0.403237		0.429888	0.0139529
55	0.409883	0.464896	0.35831	0.32911	0.442199	0.456701	0.328613	0.334381	0.563358	0.321396	0.504903	0.369565	0.418375	0.359768	0.422492	0.574022	0.407242	0.470618	0.380244	0.437296	0.52827	0.443622	0.469005	0.418012	0.40385		0.424645	0.01403
56	0.386825	0.445375	0.344536	0.324002	0.434098	0.450479	0.311947	0.328703	0.54995	0.294832	0.507532	0.374522	0.423165	0.362778	0.424232	0.58857	0.400364	0.466985	0.38352	0.438931	0.522596	0.434939	0.464798	0.42481	0.414403		0.420116	0.0146565
57	0.375499	0.436558	0.337528	0.318794	0.43008	0.440468	0.300612	0.329562	0.552413	0.295358	0.50854	0.368346	0.427503	0.373404	0.426947	0.604651	0.38538	0.474876	0.380351	0.442153	0.510946	0.420632	0.460167	0.427741	0.418994		0.4179	0.0151827
58	0.372545	0.417291	0.336805	0.322697	0.418479	0.449932	0.294043	0.327856	0.554442	0.29803	0.505241	0.3642	0.42979	0.388281	0.411942	0.594961	0.387884	0.473819	0.364783	0.433859	0.498992	0.410662	0.455715	0.428275	0.418427		0.414358	0.0148917
59	0.36709	0.400901	0.339578	0.33234	0.403638	0.448483	0.289377	0.324668	0.545068	0.29759	0.497865	0.371152	0.441921	0.404971	0.393516	0.555754	0.382425	0.473696	0.370935	0.434045	0.496952	0.399403	0.454659	0.425241	0.420105		0.410855	0.0138949
60	0.36327	0.390892	0.325836	0.325808	0.379796	0.470128	0.282441	0.323899	0.547754	0.297715	0.48594	0.378747	0.447667	0.412648	0.378558	0.538467	0.382044	0.468994	0.354726	0.434814	0.508216	0.389902	0.458196	0.433974	0.430175		0.408424	0.0143414
61	0.351337	0.382315	0.323103	0.321418	0.374837	0.468441	0.276899	0.324118	0.585698	0.298615	0.480808	0.379209	0.460975	0.429908	0.37776	0.526809	0.37768	0.463629	0.345438	0.439931	0.51378	0.37152	0.468494	0.432137	0.438673		0.408541	0.0153938
62	0.337881	0.376721	0.312687	0.311214	0.367443	0.456447	0.280333	0.327414	0.600263	0.290544	0.47645	0.376152	0.469882	0.441151	0.360324	0.525363	0.381543	0.45315	0.351974	0.456781	0.500103	0.35288	0.473808	0.43444	0.458267		0.406929	0.016118
63	0.340862	0.372661	0.301267	0.306053	0.357136	0.459135	0.27573	0.322752	0.590043	0.283268	0.475436	0.370413	0.469008	0.434101	0.36539	0.524223	0.381491	0.447104	0.350988	0.475322	0.489077	0.341138	0.488505	0.434858	0.478356		0.405373	0.0165796
64	0.344145	0.369197	0.29443	0.303515	0.355149	0.460401	0.273187	0.31739	0.570348	0.266817	0.482854	0.381495	0.469243	0.41869	0.359595	0.512126	0.378735	0.443099	0.348776	0.477185	0.489564	0.332289	0.494876	0.435957	0.508468		0.403501	0.0169141
65	0.330029	0.368295	0.29089	0.299336	0.350567	0.469546	0.275279	0.312776	0.587826	0.269398	0.491863	0.388177	0.473703	0.417813	0.350915	0.497076	0.383085	0.431737	0.348683	0.479954	0.482797	0.337716	0.49165	0.437971	0.52259		0.403587	0.0174395
66	0.321266	0.366044	0.296087	0.300984	0.359794	0.472861	0.26397	0.310947	0.58379	0.269214	0.489813	0.393316	0.476159	0.420353	0.338227	0.512639	0.375659	0.425571	0.334794	0.473662	0.473863	0.338072	0.492431	0.446395	0.513547		0.401978	0.0176414
67	0.326401	0.357367	0.297749	0.316118	0.358043	0.460804	0.258712	0.304151	0.595199	0.276129	0.479884	0.388764	0.47466	0.423404	0.339457	0.510873	0.372049	0.41873	0.338372	0.4644	0.476141	0.334712	0.489382	0.444391	0.5137		0.400784	0.0174822
68	0.33158	0.347142	0.299484	0.315901	0.353694	0.444227	0.257868	0.293839	0.608404	0.275728	0.488223	0.389486	0.475486	0.426094	0.343576	0.524669	0.367819	0.410831	0.335993	0.469948	0.478932	0.328872	0.484941	0.432167	0.513688		0.399944	0.0180141
69	0.332163	0.348104	0.299352	0.308354	0.358442	0.435437	0.25845	0.301629	0.599713	0.275899	0.484982	0.394782	0.484982	0.424712	0.339035	0.517731	0.369586	0.401797	0.339023	0.463608	0.479953	0.325688	0.490034	0.440147	0.499341		0.398918	0.0176366
70	0.323955	0.352582	0.298844	0.302922	0.352907	0.431576	0.259032	0.308667	0.594973	0.277436	0.47047	0.387938	0.49152	0.42447	0.333777	0.502982	0.357897	0.403971	0.33332	0.488332	0.486281	0.323238	0.485318	0.447362	0.49625		0.397441	0.0176648
71	0.313339	0.35252	0.304433	0.30134	0.339368	0.431862	0.2658	0.316223	0.596062	0.274205	0.455795	0.384741	0.495636	0.408567	0.328157	0.504835	0.351095	0.392102	0.334838	0.497497	0.488692	0.331104	0.475415	0.436895	0.47951		0.394401	0.0174518
72	0.304492	0.349015	0.310228	0.296034	0.324198	0.434833	0.261632	0.325497	0.607242	0.270619	0.44983	0.385069	0.500155	0.357672	0.322251	0.507046	0.351532	0.385956	0.328884	0.483119	0.476215	0.329277	0.461576	0.420964	0.464345		0.388307	0.0175234
73	0.313373	0.34684	0.316542	0.290925	0.307636	0.431216	0.25813	0.334375	0.598559	0.261846	0.445596	0.385046	0.514358	0.340604	0.317413	0.516432	0.343062	0.370494	0.33311	0.474238	0.467109	0.336004	0.445199	0.414125	0.450935		0.384527	0.0174393
74	0.319597	0.350325	0.316007	0.292514	0.301432	0.438633	0.254869	0.342792	0.576838	0.260434	0.429362	0.388885	0.52349	0.328371	0.30419	0.515092	0.334461	0.367152	0.326822	0.462342	0.458298	0.341848	0.441328	0.400525	0.428664		0.380171	0.0169175
75	0.320491	0.350226	0.317105	0.284044	0.304718	0.451778	0.246476	0.34856	0.577072	0.263678	0.424706	0.391129	0.527299	0.312098	0.298009	0.497418	0.334292	0.354994	0.3266	0.474591	0.453955	0.342837	0.435186	0.400498	0.416433		0.378168	0.0170592
76	0.327924	0.342245	0.321291	0.272937	0.314285	0.436974	0.246905	0.359785	0.575489	0.271125	0.410161	0.389785	0.542848	0.299857	0.289519	0.5068	0.326053	0.348609	0.324892	0.489613	0.451012	0.34743	0.428906	0.390071	0.409019		0.376941	0.0173767
77	0.328408	0.33743	0.305312	0.268231	0.311006	0.420092	0.244316	0.369277	0.565046	0.265431	0.399884	0.390801	0.544242	0.287999	0.28472	0.514077	0.322937	0.340542	0.329224	0.499611	0.451475	0.354817	0.419334	0.389865	0.401278		0.373814	0.0176254
78	0.324381	0.337122	0.297433	0.266939	0.317354	0.433441	0.248615	0.363335	0.54346	0.257078	0.39966	0.391068	0.544847	0.279599	0.298145	0.48735	0.335045	0.328438	0.323325	0.513317	0.467556	0.356083	0.404335	0.401177	0.40328		0.372895	0.0173634
79	0.321916	0.346508	0.298482	0.267031	0.341405	0.435419	0.252232	0.353884	0.52482	0.248685	0.405134	0.392216	0.542292	0.271889	0.292308	0.49441	0.338843	0.32832	0.321721	0.525367	0.483424	0.349406	0.392184	0.399915	0.408632		0.373458	0.0175164
80	0.329506	0.343548	0.30292	0.261646	0.373367	0.439477	0.263845	0.350361	0.508327	0.244679	0.402772	0.390036	0.532736	0.268044	0.28899	0.513565	0.3369	0.328223	0.320741	0.524478	0.483974	0.343971	0.384186	0.402264	0.396276		0.373393	0.0173149
81	0.327728	0.333401	0.293328	0.255766	0.392266	0.447744	0.273795	0.350035	0.495918	0.249026	0.386369	0.388624	0.533977	0.257495	0.292884	0.511446	0.336771	0.327131	0.323475	0.523756	0.4809	0.340262	0.378517	0.401132	0.374894		0.371066	0.0172153
82	0.321993	0.328967	0.292471	0.260644	0.396753	0.457231	0.271048	0.339155	0.499302	0.249782	0.380641	0.398018	0.542437	0.246973	0.300921	0.501286	0.326981	0.325107	0.320294	0.526415	0.480571	0.340318	0.37245	0.388136	0.360801		0.369148	0.0175254
83	0.33335	0.318725	0.288218	0.257447	0.391508	0.458513	0.262419	0.328232	0.49898	0.248777	0.373779	0.411625	0.544744	0.242585	0.29662	0.528362	0.324392	0.323961	0.322263	0.541751	0.458582	0.339353	0.363669	0.380665	0.356232		0.36779	0.0182684
84	0.348416	0.305572	0.293404	0.260387	0.398316	0.456582	0.272511	0.334952	0.520103	0.250406	0.368704	0.429621	0.560921	0.232918	0.301982	0.516666	0.311304	0.331404	0.319863	0.526534	0.441895	0.344334	0.350682	0.380669	0.358684		0.368673	0.0183326
85	0.345948	0.300605	0.286454	0.267631	0.398428	0.469564	0.27368	0.339689	0.527179	0.253827	0.350963	0.432084	0.561796	0.220052	0.302457	0.521249	0.297101	0.348922	0.318345	0.530597	0.432432	0.346158	0.33819	0.378825	0.365503		0.368307	0.0188246
86	0.344393	0.300018	0.276419	0.270386	0.409413	0.475495	0.273009	0.334634	0.500636	0.259475	0.340983	0.427101	0.569142	0.222832	0.305058	0.520765	0.29213	0.378651	0.306653	0.541026	0.423466	0.344506	0.333089	0.367983	0.358709		0.367039	0.0188594
87	0.345074	0.299709	0.266822	0.275093	0.405944	0.507535	0.273192	0.361951	0.489689	0.261287	0.326471	0.432035	0.563408	0.224605	0.303612	0.526723	0.288263	0.420498	0.295425	0.553965	0.423708	0.34836	0.32921	0.36571	0.347899		0.369448	0.0195113
88	0.345255	0.293167	0.261292	0.27293	0.383793	0.546604	0.26764	0.414392	0.484157	0.264919	0.325219	0.437283	0.548153	0.222123	0.296727	0.546725	0.292143	0.457531	0.285814	0.552766	0.411038	0.345525	0.322044	0.357544	0.339747		0.370981	0.0205036
89	0.342743	0.281984	0.259709	0.262984	0.351006	0.5534	0.258565	0.439706	0.476768	0.266843	0.319907	0.446031	0.535633	0.227044	0.304053	0.560633	0.299342	0.45234	0.272616	0.544502	0.413065	0.34071	0.313698	0.353764	0.325176		0.368089	0.0208982
90	0.335659	0.293923	0.262406	0.261454	0.339214	0.552543	0.246932	0.469904	0.477706	0.270068	0.309503	0.459022	0.528606	0.226848	0.318532	0.545135	0.294062	0.429529	0.260817	0.533083	0.415697	0.340946	0.305399	0.339774	0.314667		0.365257	0.020825
91	0.320391	0.307415	0.27344	0.261889	0.326875	0.563588	0.237757	0.482874	0.506762	0.27846	0.313266	0.469459	0.526315	0.231227	0.321819	0.547404	0.298583	0.392854	0.262915	0.523978	0.403573	0.337027	0.296771	0.335645	0.305864		0.365046	0.0211223
92	0.307975	0.326196	0.280334	0.254059	0.315396	0.571117	0.232472	0.464522	0.507593	0.284679	0.318824	0.4945	0.533882	0.251583	0.31593	0.549656	0.294244	0.348966	0.264836	0.514993	0.401781	0.333741	0.289659	0.34487	0.305366		0.364287	0.0212121
93	0.310758	0.328178	0.28739	0.252108	0.325288	0.572387	0.225977	0.448207	0.479638	0.276536	0.318225	0.521159	0.562404	0.250353	0.308846	0.542377	0.300382	0.311873	0.256482	0.517642	0.401141	0.330558	0.293413	0.354996	0.288934		0.36261	0.0217412
94	0.322284	0.339332	0.290915	0.257236	0.313688	0.565398	0.233998	0.437694	0.462913	0.266344	0.323711	0.578015	0.623951	0.235663	0.326349	0.535292	0.310082	0.296437	0.254262	0.506401	0.410823	0.337711	0.287714	0.363866	0.26673		0.365872	0.0232354
95	0.350283	0.355371	0.283826	0.258633	0.303358	0.593314	0.240939	0.41752	0.449504	0.271361	0.327327	0.697336	0.717765	0.235562	0.330863	0.534339	0.325385	0.279818	0.251255	0.502879	0.418433	0.357716	0.283092	0.376014	0.247382		0.376371	0.0274535
96	0.367454	0.367811	0.278526	0.251383	0.310707	0.672005	0.243839	0.449902	0.447967	0.287287	0.319523	0.750578	0.76362	0.251144	0.343226	0.548825	0.368436	0.270432	0.254379	0.502027	0.441175	0.378751	0.284974	0.389208	0.247802		0.391639	0.030502
97	0.417084	0.37767	0.283877	0.248146	0.330929	0.731809	0.255682	0.49105	0.447653	0.305543	0.318689	0.840303	0.859239	0.255789	0.364565	0.577085	0.406902	0.270074	0.252729	0.513973	0.487986	0.382549	0.289892	0.435944	0.249566		0.415789	0.0352791
98	0.424037	0.417795	0.283653	0.251936	0.3764	0.755154	0.25835	0.447795	0.468033	0.315079	0.328191	0.962045	0.930606	0.258833	0.410358	0.558363	0.436048	0.272789	0.259009	0.536684	0.639711	0.393519	0.290017	0.540545	0.245061		0.4424	0.0401953
99	0.431744	0.47975	0.294329	0.266247	0.437398	0.791421	0.261438	0.426177	0.527779	0.352065	0.352224	0.984693	1	0.302189	0.497268	0.542796	0.44746	0.279444	0.258041	0.551171	0.785631	0.411667	0.299823	0.634196	0.245974		0.474437	0.0434326
100	0.46356	0.526794	0.344277	0.298605	0.546047	0.799345	0.277235	0.450688	0.711758	0.441168	0.36123	1	0.985522	0.329482	0.566589	0.536171	0.452815	0.292521	0.270865	0.547744	0.819748	0.45442	0.321267	0.627904	0.254246		0.5072	0.0430218

## Sheet: Laminin Mo
Normalised average intensity distribution : phalloidin - Laminin Mo
Basal to apical position in RNE	section 1	section 2	section 3	section 4	section 5	section 6	section 7	section 8	section 9	section 10	section 11	section 12	section 13	section 14	section 15	section 16	section 17	section 18	section 19		Mean	SEM
1	0.840938	0.604268	0.866554	0.905379	0.955635	0.77965	0.792301	0.818302	0.822342	0.952591	0.948485	1	1	0.856615	1	0.896375	0.987982	1	0.863087		0.888974	0.0234323
2	0.866661	0.720373	0.897112	0.934731	0.886949	0.843908	0.86599	0.8895	0.929129	1	1	0.973594	0.915072	0.918628	0.922774	1	1	0.930022	1		0.92076	0.016154
3	0.865157	0.789802	0.922282	0.972376	0.851678	0.931447	0.917389	0.976645	0.981664	0.979644	0.884943	0.969734	0.735673	1	0.890165	0.966458	0.995984	0.860968	0.96831		0.918964	0.0168222
4	0.884347	0.880494	0.959161	1	0.801216	1	1	1	1	0.916736	0.775343	0.936881	0.616972	0.951556	0.873187	0.891619	0.90038	0.841213	0.87803		0.900375	0.0222
5	0.943507	0.937926	1	0.950639	0.820658	0.991894	0.936928	0.990803	0.955229	0.760995	0.671043	0.827444	0.53897	0.803602	0.860137	0.868896	0.802969	0.818131	0.790101		0.856309	0.0272749
6	1	0.957897	0.94794	0.826096	0.867135	0.91042	0.752119	0.926067	0.89003	0.699205	0.575232	0.755083	0.477561	0.75992	0.841274	0.899301	0.712051	0.805151	0.745686		0.807798	0.0305831
7	0.909582	0.988586	0.835957	0.740953	0.901341	0.80957	0.639338	0.861888	0.780517	0.627084	0.521082	0.760005	0.429889	0.723167	0.791277	0.932975	0.645667	0.774581	0.713139		0.757189	0.0324381
8	0.813575	1	0.772817	0.715401	0.887595	0.731704	0.586392	0.86379	0.724504	0.60481	0.496332	0.746271	0.381054	0.686767	0.754538	0.83836	0.554153	0.73354	0.664719		0.713491	0.0334146
9	0.76736	0.932816	0.775975	0.691328	0.828882	0.684125	0.553458	0.873837	0.688983	0.597101	0.477296	0.695727	0.357757	0.645869	0.721132	0.748655	0.510939	0.713341	0.638022		0.679084	0.0318896
10	0.774072	0.862949	0.770419	0.644536	0.847967	0.649775	0.560331	0.871501	0.664579	0.599261	0.471251	0.636628	0.309733	0.608524	0.704152	0.69229	0.502356	0.711595	0.599684		0.656926	0.0322598
11	0.78366	0.801563	0.761967	0.635867	0.852634	0.633412	0.564998	0.879842	0.651726	0.592844	0.464045	0.584167	0.291718	0.577109	0.673365	0.644236	0.472377	0.708081	0.567846		0.639024	0.0329267
12	0.70512	0.733873	0.768543	0.644095	0.860148	0.609864	0.558513	0.905641	0.627712	0.581017	0.47929	0.559355	0.270426	0.571415	0.589269	0.620978	0.424799	0.698665	0.545711		0.618654	0.0336104
13	0.588647	0.684695	0.753034	0.658063	0.851374	0.581768	0.53283	0.937147	0.625837	0.566478	0.502441	0.546158	0.260569	0.569141	0.481271	0.619924	0.385001	0.695524	0.532154		0.598529	0.0350677
14	0.528567	0.648994	0.735577	0.659764	0.871554	0.57663	0.53167	0.980452	0.612614	0.551093	0.50304	0.542027	0.241023	0.563154	0.424586	0.616039	0.370533	0.695328	0.521701		0.588124	0.0380409
15	0.488345	0.598054	0.7139	0.639056	0.924499	0.600252	0.527676	0.952916	0.586303	0.530329	0.511465	0.53317	0.234296	0.556275	0.424056	0.596886	0.353398	0.683368	0.506367		0.576874	0.0387065
16	0.468608	0.551574	0.694837	0.621956	0.930641	0.611779	0.508513	0.876458	0.571024	0.530538	0.516998	0.544935	0.232359	0.544231	0.421942	0.591432	0.341732	0.669842	0.48037		0.563672	0.0370631
17	0.453555	0.514891	0.669215	0.625323	0.917294	0.605562	0.492722	0.818928	0.561102	0.535071	0.521137	0.562873	0.237403	0.517156	0.433473	0.582998	0.313493	0.642369	0.478675		0.551749	0.0353892
18	0.440143	0.481919	0.644818	0.62193	0.903427	0.588209	0.468454	0.804986	0.552176	0.534681	0.511151	0.55798	0.253895	0.49961	0.467969	0.573343	0.305207	0.615386	0.467828		0.541743	0.0341079
19	0.434923	0.462583	0.629087	0.610731	0.879296	0.550619	0.461896	0.802542	0.550862	0.533747	0.507774	0.538447	0.243732	0.492686	0.474805	0.562264	0.294987	0.591438	0.461972		0.530757	0.0334794
20	0.430533	0.439098	0.618656	0.601323	0.881388	0.531664	0.459433	0.800705	0.551121	0.525749	0.493175	0.528229	0.239439	0.488313	0.456364	0.555197	0.297399	0.586246	0.466482		0.523711	0.0336578
21	0.435546	0.42748	0.606496	0.580685	0.887686	0.513597	0.450561	0.748458	0.56712	0.515245	0.49097	0.527115	0.239515	0.492361	0.469026	0.542888	0.307298	0.593763	0.479812		0.51977	0.0323132
22	0.446732	0.421743	0.592673	0.568732	0.860834	0.497029	0.44146	0.72476	0.592203	0.523343	0.480463	0.526465	0.236125	0.505759	0.496035	0.547311	0.304596	0.601188	0.490667		0.518848	0.031074
23	0.445787	0.418696	0.567488	0.555856	0.827385	0.486749	0.439195	0.697769	0.597082	0.526132	0.461841	0.519855	0.230293	0.520017	0.512019	0.553392	0.293794	0.599624	0.482578		0.512398	0.0298787
24	0.433138	0.41494	0.557669	0.554831	0.817102	0.475259	0.444372	0.690517	0.561855	0.530831	0.470956	0.52016	0.230607	0.514103	0.54766	0.552432	0.297693	0.599679	0.471137		0.509734	0.0292354
25	0.432377	0.416867	0.558856	0.56005	0.835809	0.453358	0.451577	0.682167	0.536139	0.536459	0.468465	0.527149	0.229604	0.508754	0.579971	0.546899	0.3034	0.603819	0.479971		0.511142	0.029748
26	0.433289	0.427442	0.56401	0.562996	0.841449	0.426494	0.452127	0.672757	0.512865	0.526253	0.479244	0.526042	0.23066	0.504804	0.570094	0.559365	0.313504	0.624245	0.479401		0.510897	0.029778
27	0.425917	0.422461	0.530865	0.557652	0.82696	0.41728	0.449392	0.670473	0.487107	0.512353	0.483609	0.527378	0.232949	0.489701	0.529979	0.565858	0.304358	0.639336	0.466277		0.5021	0.0295128
28	0.418548	0.408567	0.517733	0.550501	0.828938	0.415621	0.45906	0.665274	0.472364	0.492755	0.475938	0.532998	0.232949	0.459009	0.509278	0.568298	0.294764	0.644408	0.46349		0.495289	0.0299263
29	0.420614	0.415446	0.494893	0.539061	0.872091	0.413104	0.470483	0.658048	0.451616	0.476895	0.458612	0.532438	0.238949	0.445185	0.486529	0.569072	0.288382	0.642136	0.451418		0.490788	0.0312664
30	0.423584	0.415143	0.464078	0.529858	0.914368	0.406282	0.467984	0.658349	0.428158	0.469934	0.451346	0.524491	0.23777	0.449962	0.457565	0.559936	0.276881	0.643125	0.442577		0.485336	0.0332005
31	0.428573	0.41274	0.455116	0.533901	0.950952	0.400818	0.459931	0.664793	0.418501	0.481578	0.432544	0.507973	0.230699	0.459559	0.446313	0.563077	0.275315	0.640805	0.43916		0.484334	0.0350355
32	0.424916	0.408038	0.459763	0.540307	0.959341	0.400783	0.440416	0.652253	0.410959	0.503241	0.416591	0.487361	0.226941	0.463279	0.441005	0.573181	0.272767	0.620362	0.431744		0.480697	0.035393
33	0.411665	0.398257	0.472607	0.539515	0.964527	0.403526	0.42887	0.627454	0.415114	0.516728	0.409631	0.458225	0.227117	0.478008	0.42796	0.567379	0.283048	0.623375	0.446228		0.478907	0.0352795
34	0.402513	0.393616	0.478241	0.536149	0.979945	0.408633	0.418907	0.598871	0.42077	0.527301	0.397256	0.446165	0.234785	0.475413	0.410674	0.562751	0.27374	0.626243	0.4545		0.47613	0.0358425
35	0.401321	0.396594	0.473828	0.517923	0.997891	0.40322	0.40215	0.578293	0.420697	0.53564	0.376341	0.446748	0.234602	0.484503	0.41663	0.547786	0.273345	0.617521	0.455166		0.472642	0.0363934
36	0.403163	0.392497	0.456797	0.491474	0.998806	0.383558	0.391078	0.5565	0.423873	0.542612	0.372479	0.469424	0.236132	0.481556	0.434833	0.552312	0.289819	0.609943	0.450097		0.470366	0.0360361
37	0.412379	0.38323	0.447847	0.487069	1	0.375232	0.389044	0.552114	0.426273	0.551031	0.383392	0.471848	0.233262	0.486841	0.459311	0.544955	0.294444	0.605853	0.453811		0.47147	0.0359641
38	0.418347	0.386714	0.449343	0.47855	0.977305	0.376578	0.381966	0.555304	0.430556	0.570025	0.375001	0.455582	0.228992	0.495981	0.459789	0.526001	0.300316	0.60852	0.471955		0.470886	0.0351264
39	0.411469	0.38063	0.456992	0.471679	0.948124	0.392628	0.367425	0.552712	0.429499	0.57659	0.36738	0.440355	0.225418	0.483817	0.471993	0.484178	0.29342	0.608371	0.486009		0.46572	0.0341308
40	0.403131	0.373925	0.477752	0.48355	0.921917	0.408882	0.352052	0.536872	0.426824	0.563212	0.364831	0.433515	0.223711	0.468894	0.480756	0.459963	0.288334	0.601335	0.464871		0.459701	0.0329973
41	0.392426	0.356479	0.477171	0.479834	0.906473	0.419474	0.336884	0.514256	0.418349	0.550004	0.345985	0.413171	0.228272	0.441282	0.502827	0.451454	0.277488	0.597506	0.449284		0.450454	0.032742
42	0.39065	0.352548	0.468867	0.4766	0.865596	0.432444	0.329814	0.489977	0.40629	0.522853	0.347702	0.398181	0.230538	0.429733	0.503218	0.445053	0.277054	0.583038	0.423032		0.440694	0.0306673
43	0.393693	0.347181	0.441862	0.474477	0.85712	0.438424	0.322941	0.460526	0.399652	0.516752	0.341246	0.399024	0.232612	0.422357	0.488279	0.457473	0.273805	0.576861	0.409998		0.434436	0.0301865
44	0.387873	0.35081	0.43025	0.465634	0.861293	0.451381	0.315308	0.446469	0.397821	0.533589	0.342564	0.403925	0.240977	0.429037	0.473914	0.47875	0.278971	0.559409	0.409119		0.434584	0.0300551
45	0.385196	0.343357	0.416881	0.456302	0.852658	0.449162	0.292905	0.446302	0.397296	0.537631	0.350724	0.409898	0.253153	0.431673	0.466143	0.519408	0.283371	0.533301	0.40215		0.433027	0.0296736
46	0.392541	0.344059	0.39554	0.45435	0.834242	0.438649	0.282174	0.438368	0.393943	0.534381	0.355195	0.418338	0.261013	0.397609	0.501156	0.542876	0.292808	0.528262	0.39752		0.431738	0.0291593
47	0.388774	0.340318	0.390331	0.481968	0.810675	0.436686	0.271462	0.429705	0.393315	0.523684	0.354191	0.421187	0.269692	0.38541	0.531822	0.534531	0.294831	0.538708	0.392722		0.431053	0.0286384
48	0.384471	0.341489	0.381526	0.510951	0.772144	0.423887	0.264097	0.412923	0.392303	0.507563	0.346253	0.422584	0.276901	0.378175	0.519143	0.52991	0.296466	0.530691	0.39727		0.425724	0.0270898
49	0.386769	0.336364	0.38609	0.525649	0.722081	0.417488	0.26238	0.401375	0.386382	0.505995	0.34333	0.431088	0.28421	0.365951	0.524486	0.548057	0.297036	0.515833	0.414105		0.42393	0.0255986
50	0.38645	0.325714	0.390501	0.546082	0.717153	0.414872	0.265368	0.393379	0.382527	0.512075	0.339677	0.45196	0.28698	0.362846	0.559744	0.565663	0.28227	0.499111	0.43056		0.426997	0.0266667
51	0.393196	0.315902	0.38359	0.56637	0.748556	0.413147	0.265211	0.387235	0.378619	0.511957	0.345226	0.459913	0.284233	0.37005	0.563684	0.562185	0.263266	0.479824	0.429947		0.427479	0.0282872
52	0.391905	0.31752	0.367672	0.583972	0.76347	0.413422	0.267706	0.389071	0.376169	0.491462	0.358696	0.455114	0.283467	0.376733	0.561753	0.537761	0.250655	0.468983	0.420803		0.42507	0.0286216
53	0.383181	0.30916	0.366395	0.564118	0.776528	0.40615	0.273492	0.384636	0.38093	0.481133	0.372993	0.448361	0.269454	0.368375	0.547033	0.505575	0.244189	0.46337	0.414241		0.418911	0.0284683
54	0.371796	0.301677	0.376639	0.549259	0.760573	0.392096	0.277346	0.383566	0.378291	0.49257	0.376696	0.424551	0.257477	0.359858	0.520813	0.492774	0.233826	0.458645	0.408229		0.411404	0.0277119
55	0.352226	0.297073	0.375533	0.549036	0.7408	0.37176	0.28059	0.389276	0.376569	0.498133	0.368411	0.401074	0.254148	0.365194	0.48197	0.486957	0.225289	0.452667	0.409576		0.404015	0.0269301
56	0.355156	0.301525	0.366322	0.548605	0.718251	0.359718	0.283795	0.386507	0.376542	0.493636	0.362662	0.393242	0.256138	0.374267	0.458441	0.500749	0.230459	0.448516	0.395873		0.400548	0.0258374
57	0.353995	0.309893	0.362083	0.540176	0.653778	0.352901	0.281497	0.388504	0.38441	0.482956	0.360426	0.378292	0.250367	0.379722	0.452167	0.499326	0.220669	0.447152	0.36131		0.392612	0.0236638
58	0.354303	0.317739	0.363057	0.524906	0.587068	0.349932	0.276114	0.395645	0.382038	0.478605	0.353735	0.366235	0.243135	0.385961	0.44759	0.499099	0.21589	0.450683	0.354577		0.386648	0.0216634
59	0.352801	0.324716	0.378766	0.514589	0.565007	0.344591	0.274351	0.411798	0.379414	0.485764	0.340016	0.369153	0.243143	0.386935	0.433453	0.479405	0.213744	0.456219	0.34534		0.384169	0.0208242
60	0.352507	0.332774	0.39247	0.49128	0.551655	0.3443	0.277828	0.419889	0.388247	0.51627	0.338306	0.374095	0.235482	0.387414	0.414007	0.445776	0.211371	0.470809	0.339		0.383341	0.0204682
61	0.353188	0.337778	0.380337	0.486273	0.53173	0.356774	0.281025	0.432418	0.398516	0.529343	0.317024	0.365481	0.225074	0.368584	0.387161	0.436601	0.218835	0.479992	0.344462		0.380558	0.0203292
62	0.352789	0.332396	0.367117	0.498598	0.503182	0.35795	0.292081	0.439557	0.399767	0.530088	0.312275	0.353102	0.210655	0.356281	0.381664	0.4241	0.232389	0.494114	0.32872		0.377201	0.0202962
63	0.352928	0.32492	0.364874	0.495373	0.503208	0.355054	0.295115	0.450866	0.410203	0.511671	0.311928	0.356653	0.202848	0.352826	0.376157	0.424757	0.238336	0.495221	0.319708		0.375929	0.0202014
64	0.336863	0.320748	0.366004	0.474969	0.510998	0.34464	0.296361	0.446533	0.432018	0.470289	0.308131	0.354652	0.196634	0.365593	0.361334	0.41288	0.251519	0.493673	0.312852		0.371405	0.0194124
65	0.331972	0.321647	0.360011	0.461337	0.543801	0.343088	0.299366	0.445088	0.443132	0.450344	0.303521	0.341706	0.197606	0.370598	0.343272	0.404331	0.265055	0.493128	0.301416		0.369496	0.019742
66	0.329624	0.316908	0.35938	0.457255	0.559949	0.336113	0.299802	0.445258	0.454853	0.425407	0.2987	0.325498	0.19828	0.375558	0.332309	0.398097	0.307544	0.495077	0.294996		0.368979	0.0198097
67	0.331647	0.30987	0.354502	0.455809	0.544387	0.310174	0.294917	0.442431	0.446455	0.413212	0.291138	0.313427	0.196428	0.378839	0.326349	0.39515	0.391248	0.500741	0.298698		0.36818	0.019497
68	0.326151	0.30216	0.330873	0.4559	0.55041	0.286137	0.288186	0.437318	0.442979	0.401303	0.289416	0.309237	0.191284	0.386983	0.335856	0.380229	0.415946	0.505966	0.295828		0.364851	0.0203641
69	0.326889	0.301881	0.328712	0.453617	0.554267	0.281778	0.289909	0.440641	0.446064	0.396575	0.285944	0.314955	0.192999	0.385086	0.346174	0.361116	0.366631	0.504724	0.305659		0.362296	0.0201095
70	0.319405	0.292303	0.332347	0.444078	0.52638	0.279522	0.293586	0.429871	0.470506	0.376017	0.276576	0.324101	0.187902	0.385638	0.342091	0.344051	0.364699	0.512689	0.322094		0.35915	0.0197826
71	0.327833	0.28092	0.340593	0.451051	0.515071	0.269913	0.294714	0.427134	0.47662	0.373651	0.271286	0.32863	0.188675	0.37985	0.323206	0.339195	0.407038	0.500702	0.34356		0.359981	0.0197455
72	0.327682	0.264555	0.347405	0.447575	0.510919	0.264488	0.294863	0.419976	0.470567	0.378434	0.258612	0.341161	0.198501	0.380785	0.309457	0.343343	0.47291	0.495448	0.343681		0.361598	0.0203463
73	0.326219	0.260072	0.341013	0.430302	0.508277	0.261782	0.290107	0.424509	0.475822	0.378836	0.252171	0.344139	0.206224	0.382052	0.316243	0.347422	0.445825	0.48763	0.331158		0.358411	0.0197501
74	0.328452	0.25531	0.332652	0.416468	0.485777	0.25346	0.291318	0.406836	0.480456	0.375817	0.257259	0.343506	0.208458	0.375061	0.314273	0.344495	0.394339	0.476228	0.321856		0.350633	0.0183819
75	0.317171	0.263413	0.314727	0.406847	0.478848	0.250026	0.295878	0.384789	0.471078	0.369597	0.258322	0.334891	0.206407	0.362802	0.313587	0.339008	0.375608	0.468797	0.311421		0.343327	0.0175306
76	0.318441	0.257026	0.297102	0.405596	0.501035	0.242786	0.294842	0.387644	0.472623	0.362011	0.252502	0.332156	0.20503	0.368003	0.311504	0.345493	0.395715	0.458779	0.318572		0.343519	0.0184371
77	0.325273	0.248273	0.277102	0.407785	0.517382	0.243919	0.295391	0.386777	0.480212	0.352488	0.253287	0.333183	0.210448	0.369092	0.31812	0.345286	0.417126	0.443889	0.324035		0.344688	0.019053
78	0.328407	0.247101	0.268851	0.396516	0.491809	0.240343	0.295295	0.38563	0.477303	0.349281	0.260356	0.33066	0.213004	0.365775	0.319532	0.359326	0.422322	0.432795	0.339936		0.343381	0.0181129
79	0.321435	0.256731	0.260894	0.389309	0.487557	0.228588	0.287545	0.38709	0.483437	0.358876	0.26065	0.328652	0.211864	0.361239	0.331538	0.359768	0.368084	0.435742	0.368381		0.341441	0.0179775
80	0.317896	0.258901	0.24418	0.385126	0.481195	0.218569	0.280557	0.38027	0.486088	0.373716	0.256258	0.32442	0.212331	0.361998	0.338523	0.354879	0.31525	0.42333	0.374994		0.336236	0.0182071
81	0.327059	0.272461	0.232072	0.370073	0.476	0.212642	0.281359	0.367654	0.469488	0.386848	0.25462	0.318249	0.212392	0.380535	0.351633	0.356363	0.268833	0.417028	0.366461		0.332725	0.0180924
82	0.334106	0.269143	0.234404	0.350478	0.471884	0.203464	0.28587	0.357318	0.465178	0.385964	0.260531	0.315386	0.215186	0.395471	0.359804	0.356607	0.25213	0.409619	0.340826		0.329651	0.0179458
83	0.345713	0.261206	0.238016	0.350699	0.471933	0.202625	0.280524	0.368203	0.458591	0.381202	0.26844	0.308432	0.224714	0.36964	0.35581	0.34474	0.264341	0.385834	0.307261		0.32568	0.0169872
84	0.364301	0.249898	0.233411	0.373517	0.463455	0.196558	0.275175	0.368664	0.446799	0.389041	0.279436	0.299884	0.222885	0.354701	0.341689	0.313378	0.268395	0.371424	0.27104		0.320192	0.0170296
85	0.364161	0.241288	0.237188	0.371522	0.469782	0.194448	0.282706	0.360123	0.445408	0.369353	0.300343	0.305926	0.227163	0.335554	0.34127	0.305302	0.277502	0.366191	0.231328		0.317187	0.0169954
86	0.353872	0.232437	0.233305	0.365196	0.463429	0.202938	0.292611	0.352195	0.432141	0.36186	0.318574	0.309785	0.247061	0.327368	0.344765	0.301375	0.284191	0.358952	0.205559		0.315138	0.0162807
87	0.347634	0.231039	0.231117	0.3476	0.44877	0.212286	0.295342	0.344758	0.429727	0.359795	0.322643	0.324256	0.257822	0.322032	0.352958	0.29912	0.283776	0.353143	0.180696		0.312869	0.0159161
88	0.338927	0.231039	0.233693	0.33272	0.429144	0.209204	0.294059	0.327317	0.433746	0.355855	0.326024	0.342845	0.259566	0.318006	0.36224	0.304952	0.326854	0.345293	0.171746		0.312802	0.0155718
89	0.322348	0.221567	0.248157	0.324193	0.419355	0.203984	0.281268	0.31808	0.439422	0.364766	0.330902	0.352371	0.26122	0.314587	0.364339	0.305919	0.378594	0.339049	0.160874		0.31321	0.0163148
90	0.312596	0.214847	0.263577	0.318337	0.412795	0.200107	0.279805	0.309876	0.4325	0.372707	0.318708	0.343838	0.271023	0.328147	0.362017	0.317676	0.423088	0.338279	0.153518		0.314392	0.0168691
91	0.305119	0.211446	0.271299	0.31388	0.422924	0.200658	0.281068	0.307207	0.41882	0.382697	0.313978	0.325668	0.281746	0.343498	0.36473	0.334486	0.42173	0.341264	0.149862		0.315373	0.0169504
92	0.316635	0.207674	0.291617	0.312719	0.419826	0.203404	0.28116	0.320158	0.410135	0.39336	0.301149	0.319871	0.333718	0.365183	0.363301	0.339689	0.4285	0.334079	0.147558		0.320512	0.0169805
93	0.310349	0.215996	0.290306	0.316263	0.473548	0.208641	0.275087	0.346746	0.411189	0.392765	0.305587	0.319023	0.361699	0.418611	0.37453	0.352417	0.470243	0.324338	0.148717		0.332424	0.0194078
94	0.31095	0.216639	0.29355	0.319208	0.527596	0.216391	0.265641	0.40148	0.406194	0.387288	0.292869	0.325226	0.406501	0.487307	0.400501	0.370392	0.565724	0.339213	0.155285		0.351998	0.0242147
95	0.315662	0.22156	0.295281	0.320759	0.508256	0.230193	0.268874	0.412665	0.4126	0.387217	0.277996	0.344835	0.42056	0.467307	0.46876	0.392358	0.710767	0.355917	0.160125		0.366931	0.0284789
96	0.331028	0.227917	0.292998	0.321608	0.484599	0.25499	0.267535	0.419069	0.432327	0.403593	0.276013	0.428846	0.408268	0.44735	0.567861	0.41954	0.794074	0.367909	0.163104		0.384665	0.0321804
97	0.349149	0.238189	0.293715	0.326228	0.481892	0.287113	0.271017	0.41047	0.473177	0.517455	0.285339	0.544099	0.445302	0.483376	0.705644	0.519875	0.828719	0.368244	0.163012		0.420632	0.0376363
98	0.377794	0.262703	0.306271	0.342209	0.497493	0.305304	0.284766	0.319232	0.559156	0.587971	0.293511	0.575954	0.529725	0.514091	0.817129	0.633938	0.8204	0.388346	0.166377		0.451704	0.0422999
99	0.433325	0.291124	0.332993	0.359528	0.549314	0.320508	0.325227	0.267091	0.653765	0.593523	0.308885	0.541808	0.644814	0.506128	0.817647	0.655421	0.770222	0.392511	0.171941		0.470304	0.0421397
100	0.442224	0.347272	0.401624	0.378005	0.630806	0.341077	0.360244	0.268138	0.907498	0.608989	0.346319	0.418346	0.686608	0.504536	0.728607	0.659982	0.678157	0.350345	0.184553		0.486491	0.0431906

## Sheet: Opo Mo
Figure 4-source data 3
Normalised average intensity distribution : phalloidin - opo Mo
Basal to apical position in RNE	section 1	section 2	section 3	section 4	section 5	section 6	section 7	section 8	section 9	section 10	section 11	section 12	section 13	section 14	section 15	section 16	section 17	section 18	section 19	section 20		Mean	SEM
1	1	1	0.995627	1	0.81246	1	0.685973	0.84594	0.680812	0.726049	1	0.939682	0.951215	0.936024	1	1	0.982047	0.991277	0.986381	1		0.926674	0.0250069
2	0.986877	0.961521	1	0.992405	0.821446	0.957905	0.682881	0.876571	0.765146	0.740922	0.931184	0.969032	1	0.961283	0.950967	0.88959	1	1	1	0.914829		0.920128	0.0214533
3	0.942489	0.875899	0.996922	0.972281	0.839549	0.873752	0.68546	0.908312	0.780951	0.767644	0.87539	1	0.968137	1	0.88245	0.813601	0.981444	0.949483	0.892707	0.837223		0.892185	0.0194673
4	0.930146	0.809209	0.991187	0.95285	0.853551	0.835941	0.663588	0.969568	0.783614	0.844808	0.818948	0.988531	0.924654	0.999088	0.864147	0.753166	0.875368	0.873489	0.783348	0.766933		0.864107	0.0204154
5	0.895082	0.791015	0.967491	0.916627	0.871192	0.769	0.590506	1	0.77291	0.894654	0.792952	0.93382	0.862086	0.941183	0.821689	0.710395	0.819104	0.829337	0.63557	0.693762		0.825419	0.024455
6	0.877729	0.775585	0.956688	0.87974	0.897218	0.737832	0.576257	0.984653	0.744549	0.924537	0.769465	0.809126	0.840598	0.899518	0.788792	0.676778	0.749962	0.754121	0.555393	0.621066		0.79098	0.0269656
7	0.857053	0.74346	0.937301	0.861388	0.90617	0.697309	0.555326	0.957412	0.776978	0.974259	0.747604	0.752975	0.834331	0.846656	0.721019	0.636622	0.694504	0.725849	0.520052	0.548841		0.764756	0.0299521
8	0.838861	0.730555	0.910669	0.838013	0.91487	0.656598	0.511174	0.939971	0.798324	0.99161	0.72012	0.668042	0.832795	0.828287	0.657495	0.609574	0.658806	0.679057	0.478195	0.514106		0.738856	0.0332787
9	0.838064	0.703397	0.878019	0.826273	0.916004	0.611626	0.465686	0.929883	0.809868	1	0.662285	0.638505	0.826037	0.79603	0.604178	0.592161	0.613612	0.660127	0.471667	0.491682		0.716755	0.0355813
10	0.839634	0.684066	0.859025	0.808532	0.915785	0.569877	0.450971	0.926393	0.850214	0.969928	0.572494	0.614193	0.844133	0.79042	0.580116	0.571848	0.59486	0.646337	0.464482	0.470015		0.701166	0.0375094
11	0.845344	0.675099	0.852344	0.7926	0.922481	0.53478	0.45224	0.924466	0.926314	0.93097	0.532721	0.594608	0.863257	0.794838	0.571736	0.552528	0.577107	0.635536	0.462006	0.447914		0.694444	0.0396837
12	0.854007	0.667807	0.851299	0.772107	0.927927	0.480493	0.458498	0.930889	0.982696	0.887386	0.499228	0.582483	0.893906	0.795126	0.567294	0.536891	0.540687	0.633258	0.451529	0.423619		0.686856	0.0425852
13	0.861033	0.667165	0.854124	0.767633	0.942088	0.460744	0.459072	0.924052	1.00045	0.791074	0.466457	0.547679	0.901703	0.78907	0.557875	0.52351	0.524998	0.637451	0.438287	0.39479		0.675463	0.0441247
14	0.874027	0.67303	0.857308	0.7584	0.952697	0.435105	0.469732	0.892775	1	0.739644	0.448159	0.526621	0.886275	0.785328	0.545075	0.507621	0.510289	0.636126	0.422465	0.382128		0.66514	0.0448759
15	0.876505	0.671773	0.855104	0.763877	0.956824	0.429747	0.475076	0.864309	0.969146	0.688964	0.423186	0.499263	0.865203	0.765416	0.541199	0.501306	0.510189	0.633474	0.407823	0.376671		0.653753	0.0444264
16	0.884216	0.666198	0.85825	0.788546	0.962367	0.418865	0.460412	0.82585	0.924314	0.602147	0.402712	0.476764	0.835915	0.761389	0.534575	0.50155	0.515851	0.613005	0.404951	0.371231		0.640455	0.0441851
17	0.888116	0.649854	0.857066	0.801617	0.965347	0.415441	0.444345	0.758104	0.825031	0.564337	0.396491	0.460822	0.807756	0.753737	0.530298	0.503171	0.512902	0.605447	0.396563	0.361482		0.624896	0.0428037
18	0.878074	0.641721	0.845287	0.809246	0.95947	0.410659	0.425778	0.723625	0.763571	0.529518	0.38435	0.443775	0.805486	0.739527	0.520416	0.50152	0.50672	0.6008	0.390101	0.347309		0.611348	0.0425539
19	0.861816	0.636092	0.838041	0.813664	0.955735	0.411131	0.422105	0.693914	0.685569	0.485744	0.37125	0.438324	0.789825	0.719636	0.514578	0.482882	0.498633	0.598861	0.38356	0.334709		0.596803	0.0420636
20	0.842061	0.618918	0.810911	0.810208	0.954908	0.409563	0.420681	0.64023	0.620948	0.469838	0.369406	0.432417	0.766871	0.689411	0.503713	0.465172	0.4825	0.57961	0.383447	0.332355		0.580158	0.0407311
21	0.821641	0.609732	0.792069	0.796231	0.94493	0.40833	0.426232	0.610392	0.562747	0.450644	0.375121	0.430227	0.741707	0.672605	0.501874	0.452897	0.476653	0.575919	0.374884	0.332456		0.567865	0.0393279
22	0.804551	0.597245	0.760441	0.789618	0.933391	0.400072	0.432167	0.582586	0.521504	0.431106	0.38089	0.423392	0.734653	0.65055	0.492133	0.446561	0.472195	0.578441	0.360461	0.334601		0.556328	0.0383666
23	0.768464	0.583931	0.747016	0.781414	0.913214	0.392749	0.436146	0.559795	0.506823	0.423237	0.384468	0.41043	0.712859	0.638254	0.477876	0.442297	0.4612	0.581007	0.35001	0.340952		0.545607	0.0369581
24	0.753193	0.576827	0.734373	0.779106	0.911593	0.393661	0.457132	0.536362	0.495034	0.418007	0.391353	0.400069	0.696719	0.608096	0.452058	0.441652	0.451656	0.578416	0.337124	0.351619		0.538203	0.0362442
25	0.733934	0.575272	0.728644	0.774932	0.913954	0.397354	0.470943	0.527505	0.486923	0.417627	0.395309	0.393452	0.685125	0.588017	0.444193	0.442025	0.430635	0.565438	0.333166	0.355486		0.532997	0.0357458
26	0.722099	0.574143	0.721524	0.777533	0.921957	0.399856	0.477858	0.515	0.48052	0.418529	0.40135	0.392357	0.68366	0.558818	0.439675	0.439199	0.424689	0.551896	0.334033	0.36055		0.529762	0.035549
27	0.715323	0.572244	0.712181	0.786177	0.927538	0.411653	0.479487	0.510654	0.486083	0.412885	0.411747	0.391134	0.674078	0.555892	0.444912	0.43917	0.418337	0.544996	0.333602	0.367171		0.529763	0.0353003
28	0.712181	0.569472	0.706244	0.789975	0.934698	0.414865	0.479143	0.500464	0.482592	0.389633	0.420308	0.394778	0.665863	0.5519	0.444939	0.443217	0.404247	0.550492	0.327088	0.372972		0.527754	0.0356086
29	0.710689	0.568111	0.694711	0.793573	0.936596	0.42274	0.4819	0.486773	0.472295	0.375155	0.431291	0.394651	0.664073	0.544337	0.441571	0.44826	0.40134	0.553456	0.327998	0.378983		0.526425	0.0355491
30	0.713527	0.56025	0.68542	0.802895	0.936968	0.430517	0.483346	0.453327	0.466468	0.359193	0.438077	0.387029	0.656537	0.542734	0.436018	0.452461	0.402335	0.549857	0.329686	0.379499		0.523307	0.035854
31	0.707465	0.561582	0.680756	0.807061	0.934322	0.436531	0.485717	0.441518	0.46058	0.347134	0.442254	0.380744	0.648884	0.547854	0.428305	0.44987	0.412001	0.544223	0.335136	0.378044		0.521499	0.0358057
32	0.702029	0.565199	0.677181	0.802808	0.929791	0.439428	0.485414	0.424103	0.442765	0.341928	0.44807	0.36691	0.637476	0.557515	0.423878	0.437249	0.415044	0.537571	0.342191	0.37826		0.51774	0.0357324
33	0.699337	0.574451	0.665642	0.799902	0.916957	0.452199	0.475278	0.416736	0.4317	0.334526	0.44796	0.3604	0.635281	0.560151	0.434745	0.432508	0.411844	0.531665	0.353345	0.380832		0.515773	0.0351995
34	0.690539	0.576988	0.659678	0.793236	0.905315	0.458626	0.471784	0.413574	0.411821	0.331829	0.441665	0.350878	0.629192	0.56507	0.43991	0.426754	0.411141	0.527526	0.356654	0.38228		0.512223	0.0347791
35	0.689773	0.579705	0.645665	0.790533	0.895497	0.453908	0.462099	0.409655	0.390789	0.330584	0.421158	0.347343	0.622672	0.570678	0.440792	0.42189	0.410904	0.526749	0.3605	0.381251		0.507607	0.0346787
36	0.683891	0.575277	0.638537	0.786626	0.886063	0.448644	0.449908	0.414318	0.381172	0.330689	0.411555	0.348364	0.622818	0.568318	0.43876	0.420881	0.405796	0.527967	0.360487	0.378969		0.503952	0.0343811
37	0.6817	0.57469	0.63086	0.779577	0.885081	0.441891	0.42896	0.410797	0.36759	0.331205	0.411141	0.350179	0.625023	0.556139	0.434762	0.418784	0.398597	0.532471	0.36558	0.377809		0.500142	0.0343697
38	0.682973	0.57468	0.627915	0.767999	0.88302	0.440567	0.421842	0.412322	0.359466	0.33063	0.405464	0.351242	0.628802	0.534192	0.43275	0.415959	0.387388	0.545743	0.375077	0.380216		0.497912	0.0342115
39	0.680281	0.56726	0.63231	0.761026	0.879074	0.432808	0.40314	0.41747	0.34322	0.333206	0.398963	0.355188	0.639675	0.524779	0.424551	0.413995	0.366187	0.5498	0.384589	0.386695		0.494711	0.0344065
40	0.670383	0.565854	0.633473	0.746568	0.876518	0.432054	0.398339	0.437239	0.333493	0.337582	0.395064	0.354131	0.637282	0.514628	0.419829	0.406818	0.362189	0.556921	0.397179	0.39728		0.493641	0.0338629
41	0.672666	0.553477	0.631183	0.735546	0.865277	0.436195	0.400905	0.451266	0.328072	0.339635	0.390542	0.354892	0.620103	0.501288	0.411321	0.400276	0.356049	0.557755	0.403832	0.397598		0.490394	0.0331485
42	0.681439	0.542044	0.62885	0.723687	0.855336	0.434822	0.405206	0.447642	0.327642	0.343436	0.381994	0.360411	0.615205	0.48859	0.394608	0.399817	0.346799	0.563266	0.423223	0.386746		0.487538	0.0328004
43	0.68011	0.537218	0.628526	0.713687	0.835923	0.42834	0.40413	0.436751	0.328529	0.347398	0.376867	0.359219	0.620631	0.479758	0.383179	0.404206	0.341126	0.584783	0.433188	0.376735		0.485015	0.0324536
44	0.679634	0.530856	0.634994	0.709261	0.826667	0.423696	0.404881	0.426212	0.325002	0.350532	0.390145	0.357855	0.625265	0.477149	0.374082	0.406522	0.340656	0.597487	0.441677	0.370429		0.48465	0.0323906
45	0.681291	0.530931	0.642035	0.697213	0.816569	0.421072	0.408764	0.422745	0.325952	0.358025	0.394623	0.360109	0.625552	0.470089	0.368282	0.408654	0.344164	0.61125	0.439817	0.365385		0.484626	0.0320682
46	0.685304	0.531661	0.64761	0.692314	0.796792	0.423141	0.4127	0.420892	0.330194	0.370063	0.395295	0.366825	0.61842	0.465441	0.37025	0.413447	0.348697	0.607209	0.435406	0.362493		0.484708	0.0311506
47	0.687487	0.529952	0.652042	0.686421	0.786938	0.429031	0.413246	0.418762	0.334621	0.373918	0.394696	0.374192	0.609159	0.460638	0.375044	0.423391	0.356314	0.60524	0.434448	0.367546		0.485654	0.0303476
48	0.685802	0.526056	0.648681	0.688814	0.771973	0.432595	0.413326	0.412141	0.332172	0.381354	0.398409	0.378124	0.602742	0.456727	0.386102	0.43911	0.362319	0.614095	0.43513	0.377438		0.487156	0.0295195
49	0.69519	0.52509	0.645158	0.693267	0.760599	0.436687	0.418137	0.410469	0.328328	0.389792	0.402005	0.378417	0.60178	0.449256	0.397823	0.455042	0.364611	0.619715	0.433803	0.388702		0.489694	0.0291319
50	0.699589	0.52579	0.65167	0.69081	0.748865	0.443594	0.439934	0.407473	0.325328	0.395109	0.414626	0.376337	0.598652	0.450028	0.423586	0.460269	0.359166	0.633423	0.428186	0.395557		0.4934	0.0287351
51	0.705137	0.528203	0.653743	0.682281	0.733516	0.439934	0.443594	0.408597	0.327153	0.403699	0.426923	0.371228	0.595134	0.44652	0.429601	0.461734	0.355148	0.635275	0.403237	0.403027		0.492684	0.0283677
52	0.710416	0.536653	0.659521	0.681934	0.723652	0.418137	0.436687	0.415159	0.330039	0.406748	0.451015	0.368872	0.583846	0.43905	0.437757	0.462858	0.355847	0.64674	0.389794	0.433848		0.494429	0.0282602
53	0.711242	0.540023	0.661881	0.68125	0.710833	0.413326	0.432595	0.422284	0.339862	0.404528	0.477217	0.37173	0.586191	0.42433	0.438126	0.463373	0.360759	0.658348	0.379953	0.450038		0.496395	0.0280504
54	0.709449	0.543284	0.667723	0.679934	0.696836	0.413246	0.429031	0.43361	0.340893	0.398063	0.493746	0.372178	0.594012	0.424057	0.436393	0.464409	0.362803	0.671244	0.369536	0.462085		0.498127	0.0281211
55	0.701071	0.540774	0.671348	0.681579	0.686877	0.4127	0.423141	0.435504	0.337222	0.398291	0.502904	0.372912	0.597045	0.417529	0.435524	0.459339	0.368728	0.691707	0.36902	0.46854		0.498588	0.0282915
56	0.696703	0.538585	0.674919	0.684264	0.671001	0.408764	0.421072	0.430866	0.330694	0.399624	0.509425	0.379656	0.595427	0.41522	0.439914	0.447602	0.368688	0.683529	0.375518	0.47188		0.497167	0.0279246
57	0.694098	0.529572	0.676033	0.685027	0.664671	0.404881	0.423696	0.423535	0.327064	0.396367	0.521189	0.380609	0.590717	0.424834	0.441598	0.442499	0.367015	0.65444	0.377198	0.480535		0.495279	0.0273429
58	0.69175	0.525286	0.678743	0.69133	0.652071	0.40413	0.42834	0.422134	0.330413	0.38956	0.526495	0.378226	0.586195	0.429254	0.433416	0.440557	0.363336	0.644302	0.383557	0.485189		0.494214	0.0270952
59	0.687769	0.523292	0.679061	0.69458	0.647461	0.405206	0.434822	0.417305	0.334932	0.383192	0.516006	0.377719	0.603105	0.434505	0.425934	0.438301	0.36315	0.621247	0.389589	0.481904		0.492954	0.0267939
60	0.688133	0.512858	0.672126	0.697609	0.643568	0.400905	0.436195	0.417182	0.333705	0.369316	0.499124	0.378379	0.615152	0.433504	0.419696	0.434918	0.367201	0.605541	0.403636	0.478316		0.490353	0.0266635
61	0.691028	0.507282	0.670161	0.698126	0.629235	0.398339	0.432054	0.419213	0.329948	0.361648	0.469427	0.378825	0.629044	0.431622	0.412697	0.434426	0.382634	0.596657	0.412374	0.477907		0.488132	0.026573
62	0.694751	0.503423	0.667616	0.693127	0.624074	0.40314	0.432808	0.420366	0.323775	0.353942	0.461781	0.384269	0.630037	0.425792	0.406627	0.436434	0.387999	0.603568	0.42285	0.482117		0.487925	0.0265573
63	0.695513	0.49377	0.664987	0.690904	0.614449	0.421842	0.440567	0.416258	0.324314	0.342331	0.467209	0.394833	0.632192	0.412775	0.401433	0.4387	0.403061	0.613943	0.433338	0.482091		0.489225	0.0263039
64	0.690216	0.487345	0.661999	0.688541	0.607333	0.42896	0.441891	0.421235	0.335423	0.340039	0.46994	0.396992	0.634984	0.384466	0.405962	0.439464	0.415044	0.611833	0.440856	0.479851		0.489119	0.025844
65	0.688297	0.4778	0.658925	0.683947	0.600509	0.449908	0.448644	0.416943	0.351673	0.338809	0.474604	0.399308	0.633414	0.371058	0.425497	0.438003	0.422792	0.604882	0.464994	0.479942		0.491497	0.0249694
66	0.688674	0.469467	0.658494	0.671481	0.590172	0.462099	0.453908	0.414368	0.360454	0.33901	0.491933	0.402886	0.627607	0.359945	0.432963	0.427214	0.431622	0.604966	0.469412	0.481076		0.491888	0.024405
67	0.690169	0.47052	0.648238	0.662244	0.583887	0.471784	0.458626	0.416877	0.373791	0.337925	0.519161	0.422745	0.622155	0.358503	0.438884	0.412973	0.429253	0.602482	0.479164	0.487299		0.494334	0.0236215
68	0.693878	0.467239	0.644371	0.651756	0.574574	0.475278	0.452199	0.419642	0.37732	0.336274	0.531474	0.446095	0.604396	0.359338	0.446831	0.405189	0.422967	0.599429	0.481358	0.507154		0.494838	0.0230211
69	0.696923	0.460216	0.636683	0.636513	0.572688	0.485414	0.439428	0.4254	0.362499	0.341461	0.559379	0.445237	0.589546	0.36323	0.467334	0.399937	0.416902	0.589951	0.474437	0.535994		0.494959	0.0227814
70	0.695907	0.458047	0.629128	0.62984	0.572764	0.485717	0.436531	0.421702	0.354461	0.349905	0.594709	0.430399	0.576164	0.376881	0.477904	0.399742	0.416311	0.573655	0.467884	0.543014		0.494533	0.0225403
71	0.696895	0.455521	0.622172	0.620717	0.574417	0.483346	0.430517	0.421975	0.342606	0.356804	0.613056	0.42282	0.570733	0.378503	0.492275	0.40982	0.421634	0.569449	0.460223	0.549066		0.494627	0.0225555
72	0.70038	0.453243	0.615122	0.614172	0.575061	0.4819	0.42274	0.421397	0.328704	0.361031	0.611027	0.4128	0.55595	0.364394	0.499167	0.42523	0.432751	0.562688	0.441542	0.557392		0.491835	0.0227262
73	0.699943	0.451897	0.607316	0.602944	0.58024	0.479143	0.414865	0.420363	0.317231	0.360735	0.586152	0.401335	0.548982	0.349641	0.503812	0.427624	0.442469	0.561511	0.42869	0.566086		0.487549	0.0228571
74	0.695197	0.451354	0.605556	0.595325	0.59085	0.479487	0.411653	0.419849	0.313498	0.358982	0.569024	0.395788	0.544062	0.340547	0.505749	0.425683	0.454641	0.559745	0.419179	0.585768		0.486097	0.0230826
75	0.690087	0.450019	0.598095	0.590404	0.599067	0.477858	0.399856	0.423544	0.315613	0.354186	0.560362	0.3922	0.53569	0.341413	0.50311	0.428163	0.462241	0.55857	0.424355	0.618186		0.486151	0.0232512
76	0.691816	0.446486	0.594643	0.589602	0.62111	0.470943	0.397354	0.430473	0.312653	0.353712	0.569044	0.384678	0.525233	0.345776	0.502332	0.435151	0.465622	0.555541	0.435498	0.630624		0.487915	0.0236917
77	0.688599	0.447016	0.590343	0.589023	0.630654	0.457132	0.393661	0.435727	0.303653	0.356508	0.587336	0.376348	0.512263	0.350568	0.500534	0.443458	0.468683	0.559486	0.447877	0.632309		0.488559	0.0239886
78	0.689907	0.448388	0.57451	0.58796	0.64912	0.436146	0.392749	0.440651	0.301465	0.358147	0.583873	0.373248	0.507005	0.362833	0.489323	0.448155	0.473264	0.562579	0.469338	0.629628		0.488914	0.0239285
79	0.691851	0.448783	0.564345	0.585313	0.65985	0.432167	0.400072	0.438295	0.29791	0.352615	0.56891	0.365386	0.496817	0.371813	0.473117	0.457235	0.475473	0.583157	0.487237	0.633068		0.489171	0.0241847
80	0.692049	0.449974	0.556538	0.58675	0.66985	0.426232	0.40833	0.445989	0.294613	0.346831	0.548697	0.351347	0.490748	0.413494	0.446243	0.471953	0.47366	0.599532	0.504434	0.661001		0.491913	0.0247254
81	0.684994	0.453807	0.556283	0.589831	0.690521	0.420681	0.409563	0.450257	0.289428	0.335762	0.536311	0.34528	0.485634	0.432794	0.437416	0.484226	0.478456	0.625047	0.527048	0.681138		0.495724	0.0259338
82	0.676796	0.452829	0.562296	0.592418	0.695364	0.422105	0.411131	0.45811	0.276937	0.33141	0.532989	0.331324	0.481677	0.449881	0.427742	0.493729	0.485522	0.661443	0.52926	0.699165		0.498606	0.0272598
83	0.666785	0.449815	0.568023	0.595069	0.70076	0.425778	0.410659	0.461687	0.262804	0.327567	0.520951	0.321152	0.472986	0.447306	0.4257	0.50058	0.48994	0.662959	0.522683	0.710395		0.49718	0.0280033
84	0.656535	0.450498	0.579633	0.600628	0.70643	0.444345	0.415441	0.463195	0.252961	0.327717	0.506663	0.307864	0.471562	0.426555	0.426379	0.509623	0.494515	0.658674	0.518458	0.720691		0.496918	0.028612
85	0.651105	0.455928	0.584006	0.599997	0.711184	0.460412	0.418865	0.464498	0.249925	0.332859	0.501557	0.297691	0.468014	0.421123	0.422452	0.537196	0.517921	0.658418	0.512556	0.739798		0.500275	0.0292433
86	0.641344	0.459717	0.592205	0.599853	0.727069	0.475076	0.429747	0.462281	0.243685	0.339366	0.491608	0.29302	0.45105	0.43337	0.420277	0.550433	0.530264	0.653489	0.510909	0.758092		0.503143	0.0299019
87	0.63519	0.466446	0.594214	0.601192	0.73174	0.469732	0.435105	0.457608	0.242166	0.349685	0.491524	0.297661	0.435534	0.43667	0.423745	0.563449	0.538855	0.642808	0.513968	0.768727		0.504801	0.0299601
88	0.624908	0.478245	0.59245	0.607785	0.737789	0.459072	0.460744	0.461204	0.235697	0.352276	0.494342	0.305472	0.412039	0.428007	0.430622	0.574729	0.543607	0.639636	0.51667	0.772828		0.506406	0.0301604
89	0.61911	0.488744	0.593119	0.613849	0.745582	0.458498	0.480493	0.463574	0.231912	0.357186	0.497493	0.320192	0.401081	0.402439	0.435299	0.579309	0.55067	0.671518	0.515666	0.775522		0.510063	0.0307875
90	0.606272	0.513737	0.60005	0.627251	0.750441	0.45224	0.53478	0.462939	0.224544	0.374184	0.483546	0.327569	0.387838	0.361216	0.454224	0.571967	0.563806	0.690246	0.531744	0.773153		0.514587	0.0315279
91	0.595532	0.543811	0.607418	0.639368	0.764566	0.450971	0.569877	0.473405	0.222075	0.38037	0.468985	0.328888	0.385912	0.333592	0.472965	0.557707	0.569746	0.725364	0.558445	0.755275		0.520213	0.0325505
92	0.586184	0.575927	0.614376	0.666344	0.770652	0.465686	0.611626	0.478313	0.229111	0.388051	0.464128	0.33169	0.380146	0.317435	0.493912	0.54142	0.579094	0.768642	0.618226	0.752379		0.531667	0.0341175
93	0.583408	0.619542	0.623214	0.677921	0.780489	0.511174	0.656598	0.489705	0.232261	0.398736	0.47085	0.33713	0.382682	0.297987	0.516182	0.529771	0.610714	0.826893	0.643716	0.76147		0.547522	0.0362563
94	0.581376	0.628357	0.630691	0.684232	0.803289	0.555326	0.697309	0.495906	0.234366	0.406975	0.472335	0.332786	0.383063	0.285362	0.526707	0.526053	0.617459	0.900671	0.664381	0.780527		0.560359	0.0392152
95	0.56726	0.616055	0.640859	0.675151	0.821839	0.576257	0.737832	0.500438	0.238703	0.417396	0.471264	0.327412	0.378426	0.280363	0.541731	0.531044	0.614999	0.881435	0.661951	0.815376		0.56479	0.0399461
96	0.563436	0.584971	0.654922	0.664205	0.881612	0.590506	0.769	0.500259	0.244532	0.398615	0.480187	0.326152	0.378711	0.282865	0.566376	0.548861	0.639467	0.841589	0.63385	0.880203		0.571516	0.04166
97	0.560172	0.562206	0.698405	0.658404	0.911896	0.663588	0.835941	0.50534	0.258454	0.376875	0.50177	0.33708	0.374122	0.293945	0.619985	0.570568	0.658809	0.82727	0.567436	0.945243		0.586376	0.0442743
98	0.560171	0.532721	0.717814	0.652597	0.953203	0.68546	0.873752	0.507242	0.260641	0.373672	0.520686	0.352883	0.376826	0.303659	0.639374	0.589476	0.650306	0.813535	0.539956	0.94888		0.592643	0.045415
99	0.565488	0.524062	0.709636	0.643623	0.979593	0.682881	0.957905	0.502785	0.254667	0.341664	0.526369	0.371663	0.394638	0.349997	0.681899	0.613792	0.636242	0.821293	0.537926	0.923159		0.600964	0.0465398
100	0.569576	0.523435	0.67975	0.637433	1	0.685973	1	0.516727	0.249668	0.313496	0.54208	0.37301	0.407594	0.386512	0.701444	0.637018	0.631474	0.84412	0.543618	0.88072		0.606182	0.0471457
