# Supplementary material for: Concerted action of neuroepithelial basal shrinkage and active epithelial migration ensures efficient optic cup morphogenesis
Source: eLife. 2017 Apr 4;6:e22689. doi: 10.7554/eLife.22689 (PMC5380436; doi:10.7554/eLife.22689)
Supplement: Figure 4—source data 4. — DOI: http://dx.doi.org/10.7554/eLife.22689.032 [file elife-22689-fig4-data4.xlsx]

## Sheet: Control
Figure 4- source data 4
Normalised average intensity distribution : anti-phosphomyosin - Control
Basal to apical position in RNE	section 1	section 2	section 3	section 4	section 5	section 6	section 7	section 8	section 9	section 10	section 11	section 12	section 13	section 14	section 15	section 16	section 17	section 18	section 19	section 20	section 21	section 22	section 23	section 24	section 25		Mean	SEM
1	0.554355	0.644069	0.803172	0.595971	0.504026	0.796434	0.373084	0.855689	0.845362	0.711306	0.642163	0.423774	0.775471	0.964926	0.500766	0.611131	0.756276	0.827476	0.805282	0.423327	0.724806	0.651186	0.637404	0.612781	0.677104		0.668694	0.0301827
2	0.638607	0.730045	0.834942	0.650809	0.527807	0.982426	0.398035	0.95325	0.89397	0.777154	0.637787	0.431496	0.731488	0.927236	0.537143	0.683116	0.852733	0.949326	0.830494	0.484635	0.756692	0.708565	0.663765	0.699639	0.684739		0.718636	0.0325081
3	0.713479	0.823511	0.861443	0.715887	0.545767	1	0.474759	0.948809	0.818048	0.7954	0.652612	0.431075	0.697293	0.907822	0.55329	0.747511	0.854858	1	0.87561	0.533346	0.803583	0.720185	0.738629	0.806695	0.676778		0.747856	0.0308937
4	0.761233	0.953067	0.851111	0.731071	0.569959	0.98177	0.551364	0.945037	0.736974	0.778728	0.707328	0.421158	0.71818	0.903327	0.553374	0.817135	0.885237	0.919293	0.920623	0.569834	0.864	0.746835	0.772035	0.874888	0.66314		0.767868	0.0297598
5	0.833639	0.92671	0.855223	0.728494	0.634149	0.974227	0.674011	0.918998	0.72897	0.786063	0.737985	0.423227	0.710349	0.871749	0.563385	0.860331	0.915523	0.852654	0.922921	0.600385	0.884909	0.753	0.786824	0.833567	0.702266		0.779182	0.0263821
6	0.810406	0.872456	0.814636	0.783958	0.634214	0.923589	0.874558	0.839847	0.737612	0.801762	0.735417	0.426898	0.683289	0.851771	0.559111	0.915676	0.905099	0.842071	0.95062	0.642827	0.853123	0.769833	0.82202	0.772425	0.733099		0.782253	0.0242385
7	0.805314	0.884559	0.793913	0.803814	0.645917	0.871608	0.978471	0.803939	0.784121	0.792033	0.778696	0.437332	0.658512	0.811676	0.594102	0.923472	0.943292	0.837708	0.999102	0.695003	0.801214	0.778913	0.844835	0.723966	0.807367		0.791955	0.0244047
8	0.816761	0.862351	0.869692	0.820393	0.67751	0.86041	0.96409	0.802921	0.841559	0.805659	0.806987	0.457709	0.642657	0.807944	0.657785	0.961633	0.959386	0.818798	0.95007	0.700912	0.764681	0.801743	0.83218	0.7479	0.803116		0.801394	0.0226652
9	0.805377	0.905514	0.883697	0.849719	0.656898	0.850397	1	0.841608	0.830647	0.848515	0.829518	0.518394	0.634466	0.806622	0.707468	0.951944	0.975693	0.77149	0.934477	0.731973	0.786662	0.836082	0.809146	0.794767	0.788655		0.813989	0.0215704
10	0.810527	0.944439	0.910391	0.822496	0.688369	0.864652	0.930082	0.884025	0.750211	0.867704	0.804563	0.616733	0.630335	0.80499	0.82324	0.95635	0.967404	0.80162	0.975333	0.784643	0.818804	0.810228	0.812976	0.822656	0.820409		0.828927	0.0186367
11	0.876766	0.95838	0.951562	0.838808	0.721789	0.848062	0.865057	0.890461	0.692804	0.83705	0.814516	0.654202	0.633681	0.812686	0.864144	0.97799	0.96896	0.805728	0.983893	0.803211	0.84092	0.806312	0.843678	0.873494	0.85249		0.840666	0.0185782
12	0.873927	0.968478	1	0.851688	0.736225	0.855139	0.802428	0.888818	0.701659	0.863074	0.819722	0.672338	0.647992	0.808526	0.890748	0.974645	0.954732	0.770145	0.986836	0.811207	0.916585	0.765678	0.866242	0.854396	0.860758		0.845679	0.01903
13	0.803738	0.944454	0.960173	0.865298	0.719387	0.903567	0.744688	0.900773	0.730505	0.816822	0.838612	0.677819	0.644936	0.832365	0.936708	0.982106	1	0.774441	0.977764	0.825029	0.935799	0.7692	0.878633	0.853708	0.884204		0.848029	0.019599
14	0.820554	0.947611	0.939889	0.895217	0.729246	0.886061	0.718964	0.912015	0.761555	0.800732	0.853246	0.682665	0.636154	0.870951	0.98019	1	0.991023	0.781058	1	0.784067	0.946159	0.768143	0.878293	0.8049	0.874089		0.850511	0.0204996
15	0.870529	0.915619	0.959618	0.967066	0.779471	0.847906	0.712876	0.925644	0.856362	0.734402	0.826401	0.652424	0.63433	0.910553	1	0.94436	0.937594	0.788852	0.967603	0.788829	0.951777	0.796231	0.855334	0.797969	0.873501		0.85181	0.0199988
16	0.879339	0.956065	0.920291	1	0.795984	0.843741	0.710016	0.975245	0.869429	0.743185	0.806717	0.614641	0.640541	0.876399	0.917808	0.930781	0.900293	0.799411	0.963758	0.825484	0.943981	0.81089	0.856682	0.838521	0.919176		0.853535	0.0198402
17	0.88969	0.994901	0.90981	0.988122	0.823793	0.854342	0.72662	1	0.810231	0.787338	0.79804	0.618787	0.633359	0.815461	0.881321	0.974284	0.890559	0.806487	0.938659	0.888564	0.968089	0.87303	0.830939	0.915046	0.949571		0.862682	0.0203193
18	0.893284	1	0.943178	0.943242	0.877523	0.852914	0.720184	0.970876	0.75921	0.827901	0.780945	0.664919	0.597793	0.845589	0.919121	0.979697	0.884239	0.774239	0.933515	0.917072	0.975413	0.869435	0.856292	0.898532	0.940601		0.865029	0.0202653
19	0.879316	0.994026	0.891928	0.96188	0.89142	0.830328	0.771164	0.947885	0.778323	0.84417	0.794256	0.690054	0.570873	0.845473	0.952855	0.960904	0.878898	0.749302	0.971727	1	0.91526	0.878843	0.95298	0.842607	0.918423		0.868516	0.0203553
20	0.89055	0.889432	0.927539	0.929488	0.856972	0.755369	0.818894	0.966185	0.754476	0.907811	0.814382	0.677001	0.574728	0.853742	0.901932	0.98181	0.892048	0.769288	0.959264	0.985186	0.897578	0.862434	0.962638	0.81756	0.944536		0.863634	0.0198942
21	0.877498	0.892987	0.959201	0.901424	0.889437	0.760286	0.82801	0.95068	0.790945	0.925604	0.83556	0.65735	0.595464	0.847746	0.817708	0.974638	0.89416	0.754539	0.920927	0.99851	0.906728	0.8563	0.943197	0.843712	0.985071		0.864307	0.0195172
22	0.910104	0.95673	0.913486	0.913715	0.87177	0.843859	0.804107	0.913978	0.877083	0.942278	0.836213	0.61575	0.642719	0.852121	0.781389	0.977018	0.872403	0.717319	0.986755	0.960006	0.888151	0.889189	0.942844	0.855884	1		0.870595	0.019595
23	0.938039	0.953248	0.875667	0.910362	0.819505	0.860816	0.752066	0.885893	0.885761	0.961091	0.907292	0.609076	0.643837	0.882925	0.773415	0.92519	0.83546	0.677476	0.965547	0.926431	0.860472	0.962197	0.907294	0.932592	0.983538		0.865408	0.0203536
24	0.934596	0.93216	0.894833	0.879138	0.85991	0.838527	0.729541	0.873522	0.920941	0.981617	0.929475	0.616155	0.632474	0.875328	0.841328	0.908743	0.826237	0.673123	0.988215	0.881847	0.874641	0.951945	0.909739	0.997525	0.979766		0.869253	0.0209273
25	0.946882	0.958764	0.843539	0.877198	0.875601	0.851233	0.758368	0.905461	0.915642	0.979611	0.903352	0.600214	0.622799	0.879341	0.873968	0.911737	0.831688	0.66152	0.973469	0.846433	0.887384	0.905148	0.976743	1	0.970917		0.870281	0.0214398
26	0.956223	0.972266	0.837296	0.885647	0.860328	0.902929	0.823575	0.897483	0.906296	0.99747	0.848537	0.582579	0.604118	0.877528	0.912273	0.898981	0.825186	0.647347	0.910991	0.859291	0.903982	0.903516	1	0.98442	0.959932		0.870328	0.0220243
27	1	0.968888	0.911646	0.857719	0.848978	0.940636	0.821982	0.896684	0.964552	0.993379	0.839913	0.587207	0.555142	0.883825	0.920851	0.885482	0.81082	0.626502	0.906301	0.887052	0.879407	0.880681	0.909967	0.972958	0.946134		0.867868	0.0233342
28	0.958826	0.921475	0.944214	0.856306	0.849611	0.889393	0.768474	0.849104	0.981448	0.938641	0.84366	0.592836	0.551551	0.882497	0.854615	0.891185	0.769534	0.605589	0.910739	0.858688	0.886227	0.858231	0.842414	0.959835	0.901534		0.846665	0.022475
29	0.966632	0.916088	0.931561	0.875562	0.86597	0.878742	0.744014	0.80752	0.941275	0.903769	0.848822	0.599143	0.59836	0.878844	0.781532	0.900629	0.757553	0.597392	0.972688	0.832788	0.894103	0.866143	0.815021	0.979715	0.907129		0.84244	0.0221641
30	0.971561	0.950365	0.880442	0.875361	0.875344	0.905871	0.672745	0.812362	1	0.908686	0.865498	0.578215	0.599494	0.911608	0.711538	0.858321	0.74406	0.592186	0.937845	0.864486	0.920124	0.936128	0.81015	0.982801	0.892168		0.842294	0.0247094
31	0.963424	0.921512	0.862467	0.848335	0.903152	0.882337	0.68917	0.834712	0.973148	0.933256	0.88607	0.566577	0.609895	0.954195	0.690407	0.796939	0.746943	0.560699	0.937793	0.871115	0.957494	0.980784	0.787842	0.96311	0.895541		0.840677	0.0257007
32	0.928536	0.914231	0.876911	0.869216	0.949557	0.79575	0.665644	0.875303	0.93563	0.949946	0.890497	0.567881	0.613012	0.948168	0.701753	0.748505	0.734082	0.555241	0.931929	0.839273	0.957251	0.982838	0.765538	0.934683	0.92725		0.834345	0.026011
33	0.916998	0.979173	0.87354	0.891731	0.917739	0.771332	0.657292	0.868479	0.91841	0.935748	0.873705	0.573236	0.608819	0.911492	0.696174	0.723129	0.74234	0.559146	0.861646	0.873036	1	1	0.756466	0.909676	0.956161		0.831019	0.0264277
34	0.927071	0.925577	0.840261	0.914786	0.897463	0.780644	0.663393	0.842479	0.846956	0.936853	0.865607	0.573649	0.611366	0.871374	0.733874	0.737551	0.748297	0.547948	0.83777	0.876303	0.997097	0.95328	0.758213	0.927785	0.989226		0.824193	0.0250838
35	0.87499	0.930454	0.835888	0.933826	0.875897	0.737507	0.629058	0.861182	0.79042	0.983507	0.886274	0.596546	0.624146	0.858514	0.770552	0.756848	0.746231	0.553376	0.819747	0.846915	0.96658	0.910581	0.760049	0.907801	0.95837		0.81661	0.0238689
36	0.873119	0.907626	0.818092	0.871958	0.892046	0.707301	0.634994	0.870661	0.74355	1	0.910919	0.614778	0.617741	0.856018	0.716105	0.746654	0.769333	0.556089	0.793735	0.880064	0.966348	0.945918	0.724909	0.910997	0.929645		0.810344	0.024348
37	0.902572	0.882059	0.757449	0.799089	0.935692	0.716079	0.639672	0.894652	0.68783	0.959548	0.920152	0.615054	0.609929	0.838427	0.724006	0.689389	0.769744	0.542686	0.761303	0.875235	0.981128	0.946948	0.712021	0.887112	0.916721		0.79858	0.0251351
38	0.884183	0.939477	0.716892	0.75741	1	0.7551	0.646403	0.906222	0.731295	0.948695	0.913103	0.608441	0.613	0.819503	0.737183	0.674792	0.740642	0.513539	0.729708	0.894622	0.987828	0.960092	0.677685	0.873259	0.910393		0.797579	0.0269628
39	0.86771	0.955954	0.658316	0.723567	0.902995	0.761252	0.645159	0.854574	0.743736	0.929052	0.93661	0.615191	0.59881	0.800989	0.690283	0.672357	0.71504	0.497162	0.748142	0.884433	0.954643	0.971104	0.655952	0.870956	0.932317		0.783452	0.0268861
40	0.836883	0.93237	0.589576	0.741522	0.893486	0.714495	0.646208	0.743032	0.756412	0.84794	1	0.633553	0.569588	0.785324	0.691662	0.673696	0.698004	0.490689	0.720954	0.863384	0.915778	0.92415	0.629907	0.872535	0.934928		0.764243	0.0267089
41	0.836687	0.911466	0.596224	0.702421	0.907751	0.657844	0.627954	0.721312	0.7591	0.830604	0.992898	0.666005	0.570314	0.756159	0.699322	0.682702	0.688038	0.487519	0.682389	0.852574	0.954521	0.88705	0.620347	0.830824	0.870151		0.751687	0.0260383
42	0.84331	0.875181	0.595945	0.694601	0.891181	0.621692	0.658663	0.704025	0.730401	0.872532	0.967071	0.677968	0.580032	0.730884	0.676133	0.642254	0.663751	0.48077	0.684586	0.827754	0.968604	0.863877	0.597932	0.77449	0.872134		0.739831	0.0257914
43	0.834722	0.844692	0.558558	0.657781	0.927545	0.602417	0.708812	0.688477	0.717483	0.874263	0.891753	0.656872	0.58167	0.740921	0.638454	0.621838	0.64516	0.466584	0.694172	0.796898	0.896993	0.855326	0.576293	0.734221	0.875598		0.7235	0.0251863
44	0.806178	0.813934	0.537719	0.649296	0.960138	0.574368	0.711639	0.646494	0.721681	0.787095	0.864302	0.634743	0.602922	0.761567	0.625499	0.611807	0.630773	0.467575	0.694256	0.758665	0.836674	0.850222	0.606056	0.694496	0.877081		0.709007	0.024055
45	0.742739	0.776106	0.531033	0.669113	0.949964	0.586736	0.666498	0.640826	0.742326	0.720791	0.864446	0.643555	0.592591	0.782979	0.582468	0.617419	0.624773	0.484519	0.681755	0.755514	0.823178	0.847662	0.619687	0.68137	0.850459		0.69914	0.0227473
46	0.762606	0.697566	0.529473	0.638285	0.851441	0.593426	0.621665	0.632523	0.740207	0.700907	0.899689	0.644274	0.572147	0.804637	0.57612	0.603703	0.631672	0.473741	0.615232	0.753493	0.781049	0.85381	0.585495	0.663181	0.813334		0.681587	0.0221088
47	0.797505	0.673299	0.502954	0.579866	0.844969	0.580245	0.591015	0.598703	0.694135	0.717738	0.863219	0.586361	0.570233	0.809738	0.577224	0.584993	0.637666	0.476698	0.598025	0.767614	0.75422	0.902829	0.554574	0.624003	0.813935		0.668071	0.0239888
48	0.76295	0.701986	0.522023	0.560517	0.80773	0.568734	0.568766	0.562392	0.6734	0.682818	0.82082	0.553401	0.586962	0.794748	0.544957	0.583478	0.6291	0.493941	0.617769	0.715194	0.745564	0.954883	0.555365	0.619945	0.758661		0.655444	0.0230657
49	0.697117	0.706412	0.57013	0.554314	0.802016	0.57837	0.533085	0.572746	0.731862	0.662558	0.799793	0.547637	0.60298	0.7545	0.510477	0.579663	0.623201	0.48767	0.61294	0.657651	0.714787	0.951023	0.576771	0.609686	0.724288		0.646467	0.0216657
50	0.691371	0.66635	0.547507	0.501757	0.798375	0.570633	0.514963	0.605681	0.72367	0.664618	0.791228	0.522946	0.576231	0.747869	0.517724	0.569643	0.607661	0.481719	0.621584	0.666296	0.728992	0.936753	0.557721	0.620067	0.697034		0.637136	0.0220157
51	0.631333	0.64971	0.493221	0.516158	0.82861	0.556693	0.496282	0.592169	0.655584	0.623427	0.725968	0.510806	0.562325	0.773297	0.540123	0.541664	0.631909	0.484233	0.614714	0.669906	0.731677	0.899075	0.551442	0.603062	0.693893		0.623091	0.0214827
52	0.58633	0.564167	0.492972	0.545078	0.78684	0.557407	0.477256	0.591202	0.674404	0.61288	0.719357	0.514799	0.57486	0.800735	0.549176	0.523814	0.597605	0.478686	0.585382	0.642362	0.699578	0.858252	0.552994	0.606708	0.686719		0.611183	0.0201792
53	0.525426	0.539759	0.515576	0.52331	0.728196	0.55017	0.453985	0.575293	0.692626	0.63488	0.71093	0.500208	0.585253	0.793385	0.556047	0.540753	0.571504	0.48037	0.562855	0.646432	0.670825	0.805277	0.542179	0.597073	0.642915		0.597809	0.018666
54	0.506716	0.536063	0.503058	0.514994	0.76537	0.544962	0.418877	0.540582	0.652165	0.608273	0.687385	0.510921	0.569573	0.770472	0.563334	0.537196	0.56437	0.486227	0.557887	0.643995	0.656822	0.808875	0.549681	0.554225	0.634113		0.587445	0.0189909
55	0.489978	0.508768	0.521331	0.483443	0.770191	0.55029	0.412041	0.500476	0.581662	0.539428	0.684152	0.532048	0.547739	0.745255	0.540562	0.539701	0.574022	0.481069	0.551215	0.640423	0.662863	0.826954	0.581201	0.535096	0.661803		0.578469	0.0197764
56	0.464021	0.52762	0.479724	0.480625	0.70499	0.543575	0.410547	0.493674	0.578593	0.543251	0.690733	0.543365	0.534092	0.750434	0.526551	0.508219	0.58857	0.503935	0.524889	0.66165	0.668332	0.788025	0.577306	0.52545	0.64201		0.570407	0.018909
57	0.448719	0.528447	0.471839	0.481808	0.628518	0.523897	0.380429	0.499629	0.604144	0.538514	0.755274	0.544073	0.52519	0.767309	0.570109	0.486472	0.604651	0.485827	0.549256	0.654234	0.647028	0.749269	0.554719	0.517252	0.638194		0.566192	0.0194313
58	0.463413	0.529049	0.439275	0.443346	0.599658	0.49433	0.392578	0.493268	0.596213	0.521249	0.74544	0.574062	0.557646	0.77972	0.581243	0.477016	0.594961	0.486311	0.557319	0.67401	0.636422	0.719851	0.544814	0.53591	0.625101		0.562488	0.0193994
59	0.459478	0.485572	0.426682	0.436331	0.568944	0.506549	0.378758	0.482368	0.570332	0.503529	0.70159	0.581929	0.585339	0.823858	0.585985	0.455676	0.555754	0.502577	0.554169	0.626413	0.654628	0.697372	0.553394	0.520404	0.675751		0.555735	0.0202613
60	0.43739	0.460798	0.392911	0.475961	0.551656	0.479751	0.358273	0.514457	0.596061	0.49134	0.689609	0.575733	0.59697	0.832043	0.599773	0.446301	0.538467	0.501666	0.553764	0.633988	0.649243	0.690046	0.527409	0.524122	0.681965		0.551988	0.0212898
61	0.423985	0.429165	0.396208	0.498598	0.580887	0.464197	0.361171	0.532369	0.605391	0.490115	0.685629	0.566313	0.598558	0.819891	0.568394	0.452285	0.526809	0.501107	0.500851	0.632543	0.657167	0.652146	0.490503	0.520988	0.677157		0.545297	0.021037
62	0.407875	0.414309	0.39769	0.473643	0.566933	0.486812	0.362523	0.531047	0.597017	0.51005	0.694525	0.546291	0.586251	0.850709	0.568336	0.458901	0.525363	0.500095	0.536814	0.621855	0.680528	0.626694	0.501634	0.514619	0.729039		0.547582	0.022337
63	0.418478	0.40266	0.388937	0.46928	0.507635	0.472018	0.361713	0.535549	0.606271	0.520186	0.731866	0.522575	0.576208	0.882189	0.537758	0.466524	0.524223	0.496653	0.508764	0.629004	0.675492	0.578448	0.511226	0.521444	0.756626		0.544069	0.0239159
64	0.425025	0.408383	0.396688	0.431939	0.488324	0.492127	0.378361	0.555996	0.651085	0.493772	0.732771	0.541736	0.58655	0.904761	0.525458	0.46135	0.512126	0.483888	0.504491	0.631364	0.661583	0.558183	0.502572	0.542741	0.797512		0.546751	0.0252516
65	0.422078	0.44987	0.401683	0.427152	0.52155	0.520212	0.376039	0.580605	0.689379	0.483158	0.727444	0.558725	0.622578	0.955454	0.555714	0.453568	0.497076	0.487798	0.502788	0.610215	0.642077	0.572157	0.510947	0.558652	0.764924		0.555674	0.0257975
66	0.430997	0.438776	0.37735	0.3987	0.564224	0.535522	0.382926	0.602802	0.670511	0.468113	0.758224	0.574704	0.625602	0.963748	0.575795	0.4466	0.512639	0.486045	0.511797	0.584985	0.626583	0.589354	0.522199	0.555623	0.745369		0.557967	0.0263557
67	0.432266	0.435375	0.407065	0.392206	0.56516	0.547416	0.406419	0.625132	0.638426	0.47727	0.762642	0.564435	0.646062	0.948031	0.590939	0.449749	0.510873	0.491349	0.506267	0.593762	0.626112	0.577151	0.532312	0.526851	0.786972		0.56161	0.0260034
68	0.428021	0.435276	0.397083	0.397438	0.516004	0.544635	0.413922	0.598591	0.630772	0.490977	0.732023	0.561509	0.68339	1	0.569462	0.442968	0.524669	0.490838	0.500652	0.609074	0.651757	0.57786	0.572272	0.502426	0.811355		0.563319	0.0276885
69	0.426036	0.419887	0.380386	0.412227	0.535215	0.521829	0.422118	0.577583	0.624442	0.501343	0.718554	0.565575	0.751602	0.988857	0.54609	0.45467	0.517731	0.475875	0.495859	0.624087	0.657323	0.5897	0.585314	0.512309	0.760946		0.562622	0.0273347
70	0.425421	0.38924	0.36862	0.431814	0.555194	0.511126	0.38402	0.578244	0.628561	0.497867	0.729812	0.589341	0.766025	0.925744	0.56767	0.469169	0.502982	0.492314	0.505678	0.641869	0.694545	0.599299	0.589013	0.520349	0.774124		0.565522	0.0271249
71	0.409288	0.378681	0.386252	0.429521	0.528343	0.525452	0.378246	0.597419	0.621996	0.499206	0.77072	0.611428	0.768879	0.858419	0.630962	0.477617	0.504835	0.482675	0.497752	0.61603	0.68391	0.590892	0.603397	0.543398	0.781554		0.567075	0.0264848
72	0.398149	0.424233	0.388308	0.40919	0.514467	0.52701	0.376583	0.661788	0.595077	0.494994	0.788513	0.625434	0.792801	0.828871	0.672568	0.49132	0.507046	0.488807	0.482628	0.618466	0.666278	0.57254	0.581298	0.569913	0.728588		0.568195	0.0260087
73	0.399153	0.448349	0.381715	0.402319	0.529008	0.533694	0.377679	0.739173	0.655562	0.47312	0.769172	0.604494	0.809771	0.842535	0.654122	0.483313	0.516432	0.496815	0.517233	0.612541	0.679528	0.55488	0.582153	0.558721	0.725699		0.573887	0.0267478
74	0.396157	0.446355	0.4498	0.401852	0.521057	0.562948	0.370891	0.810218	0.651731	0.467593	0.801404	0.594642	0.808428	0.915568	0.662257	0.475308	0.515092	0.495283	0.506391	0.619541	0.718198	0.540435	0.606191	0.53901	0.744122		0.584819	0.029386
75	0.377696	0.419983	0.485832	0.400177	0.525548	0.573659	0.360986	0.827708	0.611061	0.482999	0.795497	0.626505	0.841598	0.932099	0.673164	0.500389	0.497418	0.508181	0.47016	0.624248	0.714434	0.540222	0.618906	0.552254	0.697528		0.58633	0.0301998
76	0.401462	0.430823	0.444072	0.39765	0.494685	0.547947	0.385967	0.862981	0.638971	0.523312	0.75525	0.664399	0.963184	0.948457	0.65523	0.521132	0.5068	0.512662	0.482872	0.627781	0.706246	0.542842	0.63943	0.568543	0.661072		0.595351	0.0319219
77	0.422853	0.474832	0.401716	0.398764	0.53341	0.540632	0.397891	0.923947	0.634225	0.545436	0.75749	0.703758	0.997849	0.959742	0.641328	0.531225	0.514077	0.505205	0.513485	0.65069	0.708432	0.574378	0.660349	0.547883	0.629463		0.606762	0.0331507
78	0.402083	0.480303	0.393787	0.405977	0.537795	0.55466	0.42184	0.955348	0.662513	0.546711	0.8236	0.740765	0.958739	0.947237	0.651624	0.551331	0.48735	0.496816	0.505392	0.677028	0.691696	0.601424	0.649316	0.551814	0.65516		0.614012	0.0336151
79	0.405968	0.477564	0.419881	0.423152	0.529268	0.583401	0.449319	0.928549	0.73665	0.508621	0.901547	0.758461	0.913762	0.921881	0.672926	0.531888	0.49441	0.524717	0.504989	0.701964	0.712077	0.60092	0.625469	0.568883	0.704341		0.624024	0.0330212
80	0.453157	0.452942	0.40724	0.425064	0.551567	0.632545	0.482235	0.881301	0.743714	0.497205	0.924373	0.771694	0.963553	0.902621	0.704046	0.532385	0.513565	0.517808	0.505005	0.67448	0.733428	0.614048	0.625929	0.559272	0.685722		0.630196	0.0328151
81	0.455341	0.418639	0.41432	0.443397	0.578121	0.730953	0.454939	0.852274	0.77153	0.52404	0.916809	0.83789	1	0.913945	0.696316	0.534449	0.511446	0.520398	0.545403	0.672448	0.757746	0.621826	0.674064	0.550464	0.695776		0.643701	0.0340723
82	0.460904	0.434153	0.430995	0.489926	0.588352	0.763176	0.452404	0.823377	0.792031	0.544019	0.907217	0.88024	0.947705	0.878286	0.740222	0.541101	0.501286	0.523633	0.573351	0.694782	0.723759	0.61956	0.699565	0.565223	0.717927		0.651728	0.032132
83	0.483071	0.457357	0.409884	0.520234	0.576145	0.758791	0.452563	0.852139	0.750262	0.57795	0.89686	0.955493	0.905757	0.852085	0.766212	0.544622	0.528362	0.533674	0.568301	0.689449	0.714849	0.649016	0.712439	0.594082	0.723322		0.658917	0.031309
84	0.507622	0.45406	0.386669	0.554113	0.612809	0.760304	0.488309	0.859267	0.77792	0.595169	0.890981	0.992087	0.854324	0.814617	0.735129	0.532174	0.516666	0.534615	0.591126	0.692611	0.701048	0.680463	0.681384	0.621914	0.754068		0.663578	0.0303599
85	0.485749	0.470006	0.388643	0.570548	0.634517	0.793032	0.491301	0.855567	0.850119	0.625089	0.87743	1	0.86125	0.851337	0.742372	0.538723	0.521249	0.524466	0.601133	0.734787	0.725208	0.714913	0.635968	0.632216	0.763752		0.675575	0.031411
86	0.51291	0.493786	0.392353	0.588973	0.666693	0.795883	0.483238	0.835337	0.882821	0.663372	0.849897	0.988591	0.803225	0.799992	0.701026	0.581427	0.520765	0.530654	0.601108	0.720222	0.720386	0.722006	0.636869	0.607644	0.793685		0.675715	0.0292625
87	0.517191	0.515599	0.418641	0.609882	0.67444	0.784847	0.51739	0.862203	0.870137	0.709526	0.872155	0.959731	0.787844	0.773945	0.658992	0.590346	0.526723	0.537489	0.581588	0.74358	0.725146	0.724966	0.679702	0.63604	0.808886		0.68348	0.0276402
88	0.530011	0.533723	0.403288	0.621415	0.681208	0.795588	0.52897	0.852157	0.820429	0.703745	0.901062	0.9475	0.77497	0.818722	0.60483	0.599855	0.546725	0.523994	0.576686	0.79857	0.709363	0.740315	0.714977	0.697919	0.799782		0.689032	0.0275662
89	0.544953	0.507783	0.390643	0.648366	0.686962	0.82	0.522122	0.817168	0.870267	0.677508	0.89348	0.9229	0.743465	0.896889	0.635098	0.612844	0.560633	0.501742	0.61105	0.781198	0.721401	0.777061	0.713406	0.668845	0.821573		0.693894	0.0283726
90	0.554336	0.500247	0.404219	0.626134	0.64076	0.810957	0.503295	0.748376	0.912672	0.672747	0.848739	0.895994	0.672388	0.877689	0.69013	0.61502	0.545135	0.47595	0.599942	0.808206	0.76799	0.818045	0.677085	0.635765	0.820253		0.684883	0.0284293
91	0.591108	0.550311	0.425084	0.633447	0.645091	0.740622	0.501371	0.699679	0.945481	0.699061	0.793541	0.879319	0.619557	0.835485	0.669442	0.623795	0.547404	0.448125	0.603341	0.835917	0.740815	0.861265	0.665327	0.622412	0.792571		0.678783	0.0270148
92	0.611472	0.532275	0.44615	0.574925	0.706005	0.713011	0.491543	0.66276	0.916985	0.666522	0.761053	0.832364	0.591461	0.802371	0.666202	0.665771	0.549656	0.437492	0.605414	0.854618	0.740985	0.826577	0.670811	0.634404	0.793575		0.670176	0.025458
93	0.652385	0.545604	0.470397	0.568089	0.747857	0.676219	0.475461	0.680848	0.797674	0.616291	0.741672	0.83337	0.559467	0.772802	0.705355	0.685024	0.542377	0.400934	0.602511	0.908328	0.755116	0.814796	0.709056	0.647756	0.774466		0.667354	0.0250452
94	0.660535	0.535377	0.510403	0.606472	0.725233	0.642056	0.4712	0.649754	0.724781	0.611578	0.723015	0.848171	0.542626	0.723427	0.720467	0.691745	0.535292	0.381673	0.592205	0.906783	0.768718	0.823322	0.720233	0.625899	0.771792		0.66051	0.0246231
95	0.620741	0.50933	0.487333	0.606655	0.708863	0.645964	0.46843	0.60222	0.683942	0.573798	0.6942	0.854252	0.518315	0.700681	0.626958	0.692189	0.534339	0.373285	0.580306	0.876486	0.788913	0.805099	0.679651	0.627535	0.71285		0.638893	0.0242305
96	0.600648	0.507218	0.508395	0.585998	0.694698	0.661148	0.469355	0.562139	0.645818	0.539101	0.685929	0.858	0.516102	0.702966	0.592428	0.668023	0.548825	0.362551	0.611812	0.847917	0.794347	0.760555	0.665578	0.615085	0.725487		0.629205	0.0235793
97	0.615999	0.506701	0.540032	0.604535	0.718515	0.670354	0.451547	0.521969	0.573481	0.554863	0.666254	0.85102	0.520605	0.683626	0.595002	0.660595	0.577085	0.343809	0.624787	0.845486	0.795995	0.770223	0.638673	0.617221	0.739275		0.627506	0.0239283
98	0.602688	0.505966	0.51634	0.582116	0.746188	0.693752	0.464476	0.524904	0.523617	0.554254	0.656706	0.843229	0.532613	0.651874	0.596764	0.66569	0.558363	0.350865	0.622177	0.863207	0.833764	0.796705	0.587944	0.614195	0.692722		0.623245	0.0249847
99	0.581879	0.524138	0.495244	0.549983	0.787211	0.702002	0.481393	0.544444	0.526864	0.545465	0.660197	0.825093	0.534224	0.648669	0.610713	0.681883	0.542796	0.359399	0.629183	0.832378	0.870649	0.783523	0.589636	0.587063	0.666256		0.622411	0.0249448
100	0.563352	0.580349	0.524422	0.560302	0.803127	0.696354	0.456981	0.569622	0.646159	0.565652	0.662544	0.815555	0.539687	0.666113	0.600801	0.651724	0.536171	0.356474	0.635078	0.8151	0.86297	0.775445	0.597058	0.595312	0.688249		0.630584	0.0238242

## Sheet: Laminin Mo
Normalised average intensity distribution : anti-phosphomyosin - Laminin Mo
Basal to apical position in RNE	section 1	section 2	section 3	section 4	section 5	section 6	section 7	section 8	section 9	section 10	section 11	section 12	section 13	section 14	section 15	section 16	section 17	section 18	section 19		Mean	SEM
1	0.649313	0.341772	0.659751	0.899251	0.897478	0.903361	0.661566	0.740836	0.785879	0.977723	0.811168	0.799706	1	0.707754	0.740062	0.712852	0.768265	0.997691	0.767846		0.78012	0.0354697
2	0.711991	0.440061	0.706191	0.861589	0.869775	0.938347	0.752073	0.692595	0.847897	1	1	0.774905	0.989263	0.824202	0.750442	0.838	0.920584	0.985372	0.94542		0.834143	0.0323932
3	0.776745	0.513301	0.764702	0.905433	0.802934	0.994803	0.83699	0.710094	0.92469	0.972771	0.964541	0.795286	0.921894	0.979512	0.749716	0.864396	1	0.973749	1		0.865872	0.0294444
4	0.795358	0.530622	0.941524	0.959961	0.818853	1	0.975715	0.802414	1	0.944758	0.855625	0.820566	0.891566	1	0.766769	0.891237	0.983107	1	0.907018		0.888689	0.0268881
5	0.851647	0.581176	0.983916	0.987306	0.824585	0.993388	1	0.878576	0.971581	0.8744	0.740065	0.867049	0.847063	0.922929	0.857042	0.948433	0.924924	0.956435	0.815214		0.885565	0.0236023
6	0.989337	0.66646	1	0.990362	0.840384	0.926905	0.893487	0.795457	0.954617	0.820698	0.668886	0.939536	0.792387	0.9219	0.970665	0.979073	0.8952	0.893199	0.819566		0.882006	0.0231875
7	1	0.799361	0.893981	0.946037	0.865999	0.867807	0.7845	0.769177	0.878602	0.758098	0.629957	0.988515	0.723423	0.836472	1	0.989122	0.890686	0.867876	0.803012		0.857507	0.0232994
8	0.978857	0.932499	0.939206	0.916405	0.880882	0.85679	0.732017	0.823419	0.837015	0.730576	0.62458	1	0.671716	0.728299	0.844399	0.927504	0.827957	0.852118	0.757091		0.834807	0.0239712
9	0.894671	1	0.938086	0.895084	0.918534	0.832233	0.709863	0.832069	0.828612	0.73963	0.604974	0.972452	0.668305	0.652586	0.783336	0.860737	0.773093	0.844464	0.719529		0.814119	0.0254768
10	0.882206	0.938105	0.904153	0.897416	0.888541	0.848478	0.733737	0.819964	0.905875	0.737435	0.613615	0.907407	0.638941	0.658137	0.814429	0.836272	0.768467	0.860043	0.721807		0.809212	0.0228929
11	0.904105	0.875588	0.865329	0.934538	0.866035	0.850928	0.734447	0.870971	0.938931	0.73018	0.625027	0.85655	0.623929	0.700477	0.789565	0.825548	0.774596	0.87468	0.718298		0.808406	0.0220592
12	0.906612	0.882443	0.876054	0.982885	0.923853	0.82083	0.686977	0.928025	0.918005	0.732243	0.639816	0.82367	0.60299	0.626205	0.738102	0.83412	0.788453	0.801701	0.718253		0.801644	0.0258113
13	0.802976	0.894014	0.876491	1	0.957779	0.774429	0.668286	0.954165	0.905448	0.750228	0.643859	0.811631	0.593551	0.626323	0.713003	0.812916	0.798894	0.795957	0.683789		0.792828	0.0271738
14	0.757263	0.866281	0.887969	0.979588	0.934658	0.761971	0.686263	0.959303	0.884928	0.748618	0.67577	0.790547	0.566619	0.650685	0.687936	0.828061	0.799656	0.800373	0.673475		0.786314	0.0260474
15	0.783189	0.88523	0.937804	0.946102	1	0.827364	0.685818	0.907154	0.864668	0.742965	0.693043	0.807328	0.549227	0.602281	0.678982	0.869254	0.802163	0.832968	0.682228		0.79462	0.0279887
16	0.783999	0.862521	0.965587	0.96046	0.996906	0.87091	0.679058	0.850543	0.928485	0.764577	0.700974	0.863152	0.529929	0.579693	0.68145	0.898852	0.766679	0.853204	0.662765		0.799987	0.0304904
17	0.764467	0.802551	0.965838	0.93861	0.961795	0.879882	0.658728	0.853966	0.939282	0.811284	0.713934	0.893378	0.524428	0.585932	0.708861	0.914935	0.701516	0.880292	0.640598		0.796857	0.0307658
18	0.738395	0.768643	0.955692	0.907067	0.924442	0.814597	0.630556	0.843824	0.933922	0.85363	0.745332	0.925272	0.524964	0.590222	0.690988	0.894848	0.673368	0.854523	0.644654		0.784997	0.0298975
19	0.756116	0.72332	0.899733	0.919505	0.935801	0.799608	0.627154	0.844976	0.921006	0.900737	0.777092	0.940885	0.551919	0.60655	0.684323	0.877287	0.675103	0.827225	0.645399		0.784934	0.0287044
20	0.815004	0.713508	0.856631	0.950098	0.885592	0.790048	0.664666	0.900039	0.91518	0.906416	0.786397	0.929477	0.569273	0.622422	0.648173	0.893391	0.650318	0.844863	0.69304		0.791291	0.0276618
21	0.872659	0.712676	0.931948	0.900662	0.889209	0.769823	0.684671	0.951101	0.899409	0.883607	0.742297	0.899695	0.55845	0.624627	0.670644	0.887885	0.649045	0.885462	0.758766		0.79856	0.0276201
22	0.791809	0.695104	0.935162	0.877763	0.869004	0.76104	0.66169	0.954673	0.905982	0.86367	0.72554	0.870015	0.53842	0.611428	0.685921	0.878332	0.627978	0.874448	0.788577		0.785082	0.0278163
23	0.781469	0.673994	0.914251	0.929879	0.877956	0.748991	0.641907	0.970624	0.888937	0.860418	0.697722	0.853731	0.514714	0.643975	0.691661	0.878616	0.626549	0.867723	0.755903		0.779949	0.0289415
24	0.804824	0.678989	0.880656	0.968295	0.899851	0.740019	0.664236	1	0.868733	0.858008	0.714514	0.87732	0.504122	0.658484	0.724474	0.897313	0.626497	0.808947	0.731089		0.784546	0.0294198
25	0.79245	0.706358	0.893073	0.97647	0.899879	0.711803	0.749451	0.958604	0.841631	0.857851	0.77206	0.885422	0.459211	0.684079	0.77185	0.860407	0.588279	0.772746	0.720296		0.784312	0.0290449
26	0.821594	0.736997	0.855053	0.926226	0.874491	0.69332	0.7739	0.932646	0.790628	0.800307	0.76888	0.87832	0.454047	0.68017	0.731572	0.882932	0.587169	0.810826	0.736022		0.775532	0.0270115
27	0.851083	0.753926	0.825843	0.912625	0.859133	0.673296	0.768345	0.908991	0.731457	0.765534	0.779141	0.88192	0.438736	0.670732	0.68561	0.910479	0.637654	0.852968	0.714907		0.769599	0.0273007
28	0.806144	0.724551	0.819853	0.925171	0.865443	0.621741	0.780733	0.914396	0.715292	0.805796	0.762602	0.859097	0.414133	0.647502	0.672671	0.938654	0.629321	0.857975	0.707486		0.761503	0.0298088
29	0.822581	0.673783	0.809413	0.903724	0.830355	0.583199	0.79848	0.904263	0.680218	0.868887	0.742033	0.880102	0.389265	0.635814	0.706843	0.954141	0.621971	0.859798	0.644681		0.753134	0.0324765
30	0.812119	0.714714	0.774593	0.835194	0.8488	0.555018	0.819538	0.887006	0.635007	0.847353	0.739158	0.892383	0.393656	0.605126	0.718835	0.934371	0.622281	0.841971	0.646527		0.74335	0.0317619
31	0.774033	0.701323	0.721986	0.793144	0.866023	0.557112	0.805416	0.87768	0.615803	0.845636	0.704791	0.887153	0.39701	0.622829	0.684628	0.922941	0.593002	0.816106	0.668412		0.729212	0.0308772
32	0.814226	0.694181	0.73131	0.739971	0.846324	0.584011	0.765347	0.85501	0.59309	0.806407	0.651799	0.859826	0.386754	0.66383	0.643038	0.942416	0.594637	0.772427	0.638882		0.71492	0.0299481
33	0.846027	0.713337	0.782979	0.750649	0.819869	0.567287	0.719188	0.808983	0.57843	0.76234	0.635459	0.82269	0.371507	0.724471	0.643587	0.980747	0.626837	0.775629	0.643234		0.714382	0.0302976
34	0.821612	0.733633	0.826889	0.754073	0.88362	0.578068	0.703867	0.757133	0.568651	0.739077	0.619102	0.813368	0.368314	0.679853	0.665101	0.969725	0.643553	0.775108	0.643739		0.712868	0.0305037
35	0.751497	0.732242	0.852743	0.746734	0.883672	0.59381	0.712897	0.770385	0.56945	0.75726	0.538934	0.794871	0.359357	0.668256	0.698079	0.931034	0.667893	0.796443	0.623896		0.707866	0.0305877
36	0.731264	0.727581	0.867097	0.764718	0.883037	0.570258	0.697569	0.814691	0.610375	0.769187	0.528062	0.769509	0.360696	0.654574	0.701216	0.935072	0.647445	0.841533	0.627945		0.710623	0.031662
37	0.713521	0.680162	0.821816	0.78415	0.910701	0.541486	0.683203	0.800987	0.615188	0.758267	0.531563	0.749216	0.372835	0.650585	0.704669	0.93197	0.630882	0.88597	0.587739		0.70289	0.032399
38	0.710522	0.734505	0.900693	0.801405	0.878488	0.513814	0.650613	0.816197	0.603113	0.727923	0.525656	0.761712	0.372072	0.684719	0.719758	0.921471	0.648517	0.846265	0.543569		0.703211	0.0335182
39	0.737963	0.732082	0.907539	0.781837	0.839036	0.527834	0.607867	0.76505	0.571241	0.722434	0.516905	0.728696	0.36898	0.698742	0.771686	0.911704	0.64363	0.811716	0.513054		0.692526	0.0330886
40	0.715937	0.720893	0.836486	0.756016	0.888733	0.545678	0.616547	0.739391	0.542613	0.709364	0.497814	0.708697	0.368255	0.680589	0.75476	0.896438	0.638646	0.787734	0.512192		0.679831	0.0318643
41	0.662456	0.683021	0.758846	0.72178	0.936876	0.554218	0.628589	0.722679	0.556671	0.701416	0.476733	0.712142	0.365484	0.687513	0.765129	0.906501	0.65909	0.762652	0.522989		0.672883	0.031579
42	0.683945	0.607049	0.687975	0.717898	0.922309	0.552363	0.594476	0.668996	0.551755	0.700995	0.483049	0.650478	0.372081	0.670648	0.764766	0.919231	0.692157	0.769719	0.487842		0.657775	0.031571
43	0.729048	0.579004	0.668764	0.733569	0.861464	0.550806	0.548678	0.602211	0.541856	0.700628	0.469709	0.615889	0.372844	0.614294	0.780087	0.94389	0.683848	0.776825	0.455615		0.643633	0.0328601
44	0.702935	0.550806	0.642551	0.709853	0.851769	0.572422	0.507047	0.580557	0.525341	0.694706	0.457352	0.609163	0.376529	0.581126	0.780391	0.954988	0.662474	0.753111	0.478268		0.631126	0.032787
45	0.65805	0.530099	0.657325	0.657645	0.895001	0.556289	0.466902	0.566284	0.515772	0.683151	0.469909	0.563445	0.393148	0.549759	0.779777	0.983779	0.665062	0.684565	0.501031		0.619842	0.0339219
46	0.601438	0.512738	0.653683	0.621434	0.874745	0.529182	0.448586	0.558898	0.510343	0.687925	0.492371	0.555501	0.397076	0.527457	0.901857	0.985216	0.678095	0.642069	0.503344		0.61484	0.0360467
47	0.628543	0.493285	0.657234	0.615199	0.857996	0.534611	0.412619	0.545199	0.502022	0.697438	0.473422	0.579821	0.39032	0.542434	0.882446	0.986783	0.739432	0.630625	0.461919		0.612176	0.0372077
48	0.626149	0.496325	0.619798	0.661787	0.861098	0.555366	0.400205	0.551442	0.500231	0.739841	0.466643	0.573403	0.393686	0.507449	0.853317	0.976623	0.745998	0.611331	0.469036		0.611038	0.0370518
49	0.628092	0.530819	0.579162	0.678256	0.816966	0.539148	0.393361	0.514424	0.504308	0.759922	0.464126	0.516909	0.393018	0.501858	0.86995	0.979854	0.741094	0.563683	0.507882		0.60436	0.0371506
50	0.608724	0.512513	0.562788	0.672209	0.773783	0.551741	0.39123	0.490178	0.536253	0.72699	0.468759	0.516762	0.390935	0.497707	0.881204	1	0.721401	0.534163	0.528066		0.598179	0.0368448
51	0.635792	0.494037	0.571135	0.653885	0.746198	0.559821	0.390418	0.485422	0.541014	0.707359	0.500551	0.531929	0.403117	0.495242	0.873234	0.99768	0.671284	0.510869	0.518796		0.594094	0.0353477
52	0.622681	0.47596	0.593689	0.64295	0.75816	0.536814	0.379005	0.487525	0.515524	0.679259	0.505389	0.535875	0.396183	0.490665	0.847359	0.962069	0.664544	0.504394	0.522097		0.585271	0.0340189
53	0.584609	0.481584	0.586051	0.646497	0.766022	0.521628	0.375887	0.430848	0.492148	0.683378	0.538088	0.517781	0.400451	0.498627	0.831368	0.911024	0.654607	0.479755	0.485992		0.572966	0.0331245
54	0.552567	0.513694	0.604199	0.66536	0.738502	0.527076	0.364472	0.386146	0.478044	0.687059	0.523754	0.484351	0.411512	0.481995	0.770947	0.893095	0.652096	0.46323	0.491624		0.562617	0.0321059
55	0.534732	0.494146	0.615145	0.663425	0.750249	0.523255	0.359958	0.405501	0.479672	0.686089	0.491324	0.480369	0.410491	0.442198	0.724	0.888641	0.635161	0.441658	0.510104		0.554532	0.0318191
56	0.489761	0.475858	0.60086	0.631847	0.780281	0.463538	0.39476	0.407534	0.500068	0.709884	0.47255	0.48633	0.398849	0.407717	0.733841	0.891724	0.653024	0.439655	0.487284		0.548704	0.0334112
57	0.484864	0.459031	0.59247	0.614171	0.711771	0.445523	0.391234	0.373514	0.519828	0.72115	0.44859	0.446639	0.40808	0.445294	0.734577	0.883168	0.682258	0.444904	0.439483		0.539292	0.0332365
58	0.476436	0.452736	0.624318	0.6617	0.682054	0.451284	0.394261	0.36949	0.539634	0.713755	0.454173	0.428975	0.416304	0.472175	0.715381	0.875611	0.664773	0.444992	0.455201		0.54175	0.0323018
59	0.453395	0.459638	0.648412	0.73588	0.658038	0.430897	0.38212	0.38346	0.559423	0.719227	0.465274	0.43002	0.427987	0.447052	0.726787	0.867557	0.696894	0.448571	0.459386		0.547369	0.033827
60	0.448216	0.465261	0.65255	0.692272	0.714003	0.440233	0.361284	0.397416	0.565151	0.758337	0.463022	0.426623	0.43792	0.435051	0.715771	0.826792	0.658888	0.438394	0.456959		0.544955	0.0331096
61	0.439064	0.486575	0.607243	0.668615	0.738379	0.464875	0.345399	0.403976	0.542224	0.781188	0.424041	0.416934	0.433069	0.46837	0.710458	0.81846	0.689924	0.456023	0.444264		0.544162	0.0334983
62	0.450892	0.501811	0.584728	0.660118	0.706929	0.485397	0.350797	0.408299	0.565928	0.75258	0.381753	0.424443	0.4096	0.460228	0.737013	0.821731	0.678571	0.472824	0.429305		0.541208	0.0329615
63	0.479685	0.476687	0.553736	0.711315	0.684921	0.481081	0.378692	0.415442	0.587932	0.708857	0.409003	0.423881	0.404077	0.450582	0.766874	0.787129	0.683941	0.483317	0.396178		0.541228	0.0319104
64	0.487845	0.445165	0.594602	0.761526	0.725491	0.478732	0.418553	0.398563	0.58853	0.632799	0.433934	0.410823	0.402477	0.485072	0.757755	0.800591	0.704226	0.476355	0.402342		0.547652	0.0325208
65	0.491317	0.487679	0.618548	0.752905	0.695059	0.488976	0.419078	0.389186	0.582465	0.589711	0.434445	0.394153	0.388	0.506821	0.707278	0.811239	0.69175	0.476294	0.435879		0.545304	0.0306107
66	0.518021	0.513596	0.645756	0.759399	0.656598	0.468151	0.415697	0.39846	0.58123	0.552442	0.426702	0.38269	0.387911	0.491797	0.64285	0.808368	0.711916	0.494603	0.436839		0.541738	0.0298355
67	0.544257	0.496445	0.611339	0.761736	0.638759	0.440527	0.418254	0.434662	0.614525	0.55793	0.393119	0.388801	0.401677	0.501593	0.623857	0.805658	0.709012	0.465298	0.443694		0.539534	0.0293038
68	0.542423	0.513795	0.638088	0.783101	0.625621	0.393774	0.402777	0.438831	0.608063	0.576113	0.403316	0.399024	0.409657	0.518274	0.629007	0.789932	0.724632	0.444869	0.420794		0.54011	0.0304394
69	0.545922	0.546447	0.652282	0.82428	0.638254	0.390439	0.381668	0.4488	0.625552	0.5775	0.420575	0.429272	0.426101	0.554616	0.661752	0.773326	0.666095	0.423722	0.430646		0.548276	0.0304299
70	0.566137	0.559808	0.612442	0.797324	0.660377	0.41442	0.370649	0.463185	0.655146	0.565689	0.389229	0.477226	0.460489	0.573879	0.681951	0.767903	0.653563	0.431218	0.450857		0.555342	0.0289047
71	0.58602	0.555961	0.592167	0.761057	0.684807	0.396618	0.380189	0.47515	0.671602	0.544943	0.374362	0.522918	0.4681	0.582933	0.665304	0.733615	0.659041	0.458494	0.48573		0.557843	0.0269402
72	0.613434	0.521617	0.574072	0.756752	0.721082	0.372026	0.389063	0.515954	0.669409	0.561319	0.34983	0.532186	0.460131	0.635247	0.684068	0.745662	0.659925	0.483812	0.435507		0.562163	0.0290842
73	0.606512	0.512248	0.579603	0.740658	0.755019	0.386544	0.399262	0.480423	0.662216	0.541031	0.364332	0.54854	0.473362	0.694735	0.682065	0.728225	0.621895	0.489696	0.436247		0.563295	0.0285989
74	0.623186	0.508848	0.533366	0.737463	0.704219	0.40372	0.400723	0.441666	0.656228	0.51405	0.365843	0.55817	0.465094	0.744035	0.669095	0.755545	0.571545	0.504035	0.46776		0.559189	0.0284726
75	0.595058	0.547777	0.561543	0.717868	0.68349	0.397588	0.397423	0.436546	0.661485	0.50398	0.365237	0.520151	0.461722	0.6944	0.654173	0.771665	0.518386	0.542124	0.455843		0.551919	0.0273387
76	0.610326	0.535919	0.543283	0.686245	0.644931	0.350565	0.374241	0.460821	0.656151	0.497798	0.391321	0.49833	0.468923	0.677539	0.676996	0.787127	0.478936	0.537077	0.43537		0.542732	0.0278082
77	0.603131	0.473439	0.549074	0.675301	0.655101	0.358749	0.372314	0.471513	0.636221	0.528923	0.405067	0.507067	0.486685	0.662059	0.737982	0.778899	0.453588	0.514269	0.441237		0.542664	0.0278963
78	0.63191	0.492318	0.556374	0.655581	0.714514	0.384543	0.371086	0.516182	0.65242	0.558483	0.425386	0.531266	0.498482	0.642406	0.748146	0.818367	0.422758	0.526523	0.473312		0.558951	0.0285537
79	0.678611	0.513483	0.506587	0.666383	0.753134	0.400289	0.355383	0.557047	0.6301	0.599265	0.445987	0.514491	0.505861	0.660031	0.761967	0.862001	0.378644	0.521638	0.542604		0.571237	0.0312419
80	0.659889	0.473733	0.506734	0.674156	0.740607	0.385775	0.362403	0.546985	0.643534	0.631549	0.458416	0.518097	0.511947	0.664415	0.812561	0.85443	0.347706	0.50145	0.566218		0.571611	0.0328611
81	0.611746	0.489031	0.487475	0.693623	0.710461	0.369198	0.380951	0.529933	0.644555	0.639815	0.459466	0.538552	0.526221	0.690865	0.875215	0.851869	0.338966	0.469806	0.523749		0.570079	0.0344596
82	0.649927	0.546171	0.503668	0.705756	0.710213	0.367142	0.39147	0.54048	0.658121	0.624381	0.456648	0.567992	0.530291	0.680737	0.888123	0.881223	0.350106	0.483992	0.536072		0.582764	0.0347348
83	0.694211	0.560829	0.460644	0.665419	0.715047	0.386687	0.388597	0.530758	0.71707	0.607923	0.471779	0.601092	0.532795	0.713299	0.845666	0.880272	0.378415	0.483203	0.560191		0.589152	0.0338077
84	0.711518	0.56848	0.463131	0.623582	0.693754	0.387445	0.380084	0.568592	0.726349	0.600457	0.542195	0.620111	0.541236	0.744349	0.785227	0.878981	0.39112	0.484066	0.494146		0.589728	0.0323743
85	0.680563	0.582996	0.502625	0.590474	0.718634	0.377189	0.4098	0.615407	0.721404	0.604237	0.577205	0.667193	0.514739	0.735884	0.825522	0.88308	0.376394	0.470559	0.43676		0.594246	0.0335857
86	0.713507	0.594992	0.539819	0.593648	0.735612	0.375705	0.453253	0.662212	0.731239	0.632861	0.619058	0.692637	0.516389	0.729322	0.847434	0.881267	0.327143	0.468325	0.41067		0.606584	0.0354084
87	0.791681	0.577529	0.522489	0.622228	0.726053	0.365036	0.466778	0.662874	0.775711	0.648522	0.581614	0.679841	0.519706	0.725068	0.869653	0.863653	0.347988	0.476426	0.379244		0.610637	0.0369197
88	0.796464	0.552819	0.539667	0.641496	0.69515	0.37365	0.471502	0.641169	0.775455	0.652422	0.555239	0.685213	0.523435	0.687878	0.898885	0.845225	0.345616	0.480789	0.37847		0.607397	0.0365744
89	0.752767	0.549804	0.68362	0.615255	0.681875	0.378986	0.476092	0.674214	0.716882	0.648205	0.548593	0.689511	0.522054	0.659947	0.874549	0.840915	0.343501	0.490603	0.383612		0.606894	0.0343231
90	0.767603	0.527862	0.75075	0.585136	0.668094	0.381992	0.466362	0.6482	0.714087	0.668917	0.601748	0.677859	0.510933	0.610025	0.871472	0.885275	0.342461	0.508596	0.355422		0.607515	0.0362317
91	0.740584	0.50479	0.722933	0.600449	0.645518	0.378136	0.467393	0.581187	0.699781	0.709356	0.608345	0.638416	0.51542	0.616267	0.807618	0.893578	0.370551	0.536293	0.357472		0.599689	0.0337202
92	0.715623	0.488973	0.730056	0.61748	0.665537	0.385779	0.499914	0.53937	0.65174	0.739449	0.592469	0.630981	0.540869	0.641577	0.759786	0.904828	0.358116	0.542128	0.336422		0.5969	0.0335414
93	0.73501	0.503682	0.694506	0.663533	0.696369	0.388387	0.506114	0.550724	0.631878	0.746621	0.581588	0.630012	0.559126	0.649789	0.753929	0.913785	0.36237	0.552161	0.3601		0.604194	0.0329724
94	0.724665	0.528218	0.711399	0.699755	0.705857	0.389585	0.483603	0.55334	0.610384	0.709913	0.549317	0.689262	0.591699	0.601032	0.746713	0.925993	0.379559	0.569545	0.339889		0.605775	0.0333946
95	0.714704	0.494291	0.709742	0.71108	0.733853	0.421086	0.46951	0.558166	0.59053	0.656871	0.53016	0.724317	0.595702	0.582704	0.754898	0.88691	0.397172	0.573956	0.372807		0.604129	0.0315678
96	0.722358	0.47531	0.699337	0.688276	0.723718	0.449476	0.46457	0.55092	0.594693	0.662034	0.542433	0.736799	0.5887	0.56783	0.791904	0.890082	0.412942	0.555319	0.374387		0.604794	0.0316406
97	0.73723	0.498738	0.73147	0.655607	0.673272	0.482569	0.490669	0.539081	0.607511	0.700438	0.559465	0.733672	0.599471	0.55499	0.765771	0.936507	0.415753	0.585522	0.322732		0.610025	0.032705
98	0.764276	0.542262	0.743757	0.649229	0.68956	0.491225	0.493019	0.505761	0.635306	0.707392	0.563451	0.735909	0.63707	0.580151	0.784964	0.917751	0.397826	0.586565	0.310329		0.617674	0.0334275
99	0.81859	0.572109	0.72359	0.636962	0.77535	0.501893	0.507731	0.47424	0.658228	0.688177	0.557112	0.706791	0.673726	0.562641	0.769862	0.884559	0.379329	0.554369	0.309713		0.618683	0.0341728
100	0.727505	0.588235	0.771531	0.610154	0.769952	0.52868	0.522852	0.47522	0.685399	0.693856	0.509421	0.648315	0.6749	0.553237	0.714426	0.806889	0.38214	0.568498	0.320142		0.607966	0.0304603

## Sheet: Opo Mo
Normalised average intensity distribution : anti-phosphomyosin - opo Mo
Basal to apical position in RNE	section 1	section 2	section 3	section 4	section 5	section 6	section 7	section 8	section 9	section 10	section 11	section 12	section 13	section 14	section 15	section 16	section 17	section 18	section 19	section 20		Mean	SEM
1	0.978556	1	0.938438	0.996919	0.881395	1	1	0.824123	0.682793	0.673681	0.956187	0.907021	0.916376	0.936126	0.953805	1	0.973206	0.971071	0.977515	1		0.928361	0.0217372
2	0.995253	0.989927	0.958807	1	0.901216	0.979793	0.970719	0.846588	0.724926	0.692632	0.874934	0.922299	0.953071	0.950141	0.924789	0.921895	0.977067	1	1	0.914162		0.924911	0.0191787
3	1	0.957369	0.970694	0.996988	0.938031	0.898433	0.94751	0.868105	0.731523	0.726467	0.862946	0.968514	0.939229	0.972498	0.941342	0.866699	0.979719	0.982354	0.935756	0.842082		0.916313	0.0176996
4	0.994373	0.926651	0.976054	0.992242	0.958735	0.858704	0.916222	0.920638	0.723924	0.784708	0.872768	1	0.915281	0.979321	0.961171	0.816613	0.988878	0.943378	0.858749	0.805184		0.90968	0.0178156
5	0.986595	0.91917	0.997092	0.989614	0.976513	0.812735	0.890102	0.949136	0.718459	0.810662	0.890513	0.970482	0.881334	0.978702	0.998449	0.769092	1	0.952505	0.775792	0.773041		0.901999	0.0208311
6	0.978483	0.911672	1	0.982902	0.996817	0.809793	0.887509	0.979173	0.726449	0.839464	0.895001	0.884694	0.866934	0.984401	1	0.72898	0.997185	0.964288	0.720267	0.732861		0.894344	0.023044
7	0.970251	0.891754	0.984686	0.9658	1	0.794179	0.874193	0.979148	0.754318	0.929896	0.898937	0.869858	0.865419	0.976476	0.94936	0.691882	0.965501	0.955505	0.689286	0.675703		0.884108	0.0239233
8	0.944601	0.883401	0.96692	0.92617	0.992842	0.768978	0.860956	0.966173	0.757587	0.974987	0.865797	0.877857	0.875806	0.953702	0.892015	0.674059	0.938143	0.907722	0.65823	0.641092		0.866352	0.0243668
9	0.937403	0.864841	0.963774	0.908061	0.983686	0.745784	0.84865	0.967438	0.754414	1	0.82751	0.86427	0.885212	0.938316	0.870291	0.66401	0.93105	0.872419	0.638728	0.617474		0.854167	0.0255734
10	0.914436	0.853714	0.966026	0.894849	0.978584	0.716736	0.823477	0.963656	0.782564	0.965651	0.787945	0.853303	0.913331	0.944662	0.869445	0.643661	0.943244	0.843601	0.607899	0.590878		0.842883	0.0270838
11	0.909138	0.850029	0.960817	0.880571	0.966009	0.683754	0.787576	0.969542	0.852068	0.933868	0.755303	0.842725	0.94087	0.968851	0.869383	0.616539	0.96985	0.8692	0.596794	0.569897		0.839639	0.0292212
12	0.935619	0.841373	0.956752	0.846612	0.965213	0.618151	0.727337	1	0.889262	0.912108	0.746078	0.825735	0.986303	0.989781	0.837095	0.593605	0.994891	0.884953	0.57954	0.556519		0.834346	0.0332768
13	0.936383	0.839669	0.960084	0.841198	0.941582	0.596841	0.701108	0.988659	0.938384	0.890087	0.745729	0.774436	0.999625	0.986344	0.813617	0.581495	0.978349	0.859943	0.564952	0.532603		0.823554	0.0347401
14	0.913875	0.820569	0.972329	0.825313	0.934025	0.548778	0.685042	0.95991	0.966539	0.870348	0.727989	0.7523	1	0.986496	0.772057	0.569219	0.963707	0.842066	0.547272	0.516451		0.808714	0.0364142
15	0.922707	0.827691	0.960305	0.812466	0.922994	0.523965	0.660962	0.943643	1	0.850622	0.708402	0.719686	0.998933	1	0.748286	0.559385	0.96287	0.832284	0.51288	0.510594		0.798934	0.0385341
16	0.932772	0.827623	0.93189	0.808933	0.908874	0.522185	0.637783	0.91299	0.944959	0.8193	0.706879	0.695269	0.978841	0.993352	0.728105	0.557374	0.953199	0.824545	0.514299	0.507028		0.78531	0.0371918
17	0.9238	0.813726	0.923212	0.810731	0.904933	0.526741	0.624683	0.870066	0.881059	0.792683	0.696395	0.67296	0.952894	0.985498	0.725031	0.557688	0.929029	0.819164	0.496491	0.50103		0.770391	0.035863
18	0.898445	0.789069	0.897417	0.813168	0.898111	0.52288	0.623622	0.862168	0.838628	0.760969	0.676624	0.635518	0.937318	0.958075	0.730944	0.551313	0.903517	0.821705	0.484134	0.496394		0.755001	0.0347645
19	0.872689	0.772305	0.882682	0.794095	0.900736	0.519233	0.615093	0.843525	0.811568	0.711132	0.642905	0.614337	0.921695	0.919	0.724066	0.517096	0.884326	0.819369	0.471645	0.482998		0.736025	0.0345601
20	0.847397	0.758838	0.853495	0.792499	0.899862	0.515057	0.59958	0.794368	0.786053	0.687737	0.626988	0.599161	0.905264	0.898218	0.667339	0.496567	0.836713	0.790218	0.464775	0.477683		0.714891	0.0334241
21	0.828181	0.74316	0.838115	0.780275	0.88651	0.519324	0.584532	0.769547	0.743918	0.667364	0.623118	0.597707	0.866113	0.882651	0.634649	0.488758	0.819508	0.759593	0.452917	0.471761		0.697885	0.0320163
22	0.824391	0.714754	0.823316	0.786195	0.87156	0.505522	0.575304	0.719471	0.705793	0.652781	0.63761	0.593771	0.843293	0.832392	0.603626	0.497641	0.817619	0.744014	0.43891	0.461523		0.682474	0.0308611
23	0.813147	0.704861	0.807557	0.793014	0.841544	0.482722	0.575017	0.692576	0.698221	0.640163	0.646999	0.580455	0.810485	0.808442	0.589441	0.509492	0.810415	0.750454	0.419975	0.458442		0.671671	0.0301131
24	0.799413	0.698006	0.791531	0.790833	0.828978	0.460694	0.567789	0.66804	0.679816	0.627166	0.674716	0.565873	0.795927	0.745119	0.57414	0.525037	0.794176	0.754869	0.402262	0.47961		0.6612	0.0290164
25	0.782996	0.684164	0.78534	0.773165	0.819452	0.45024	0.560196	0.662535	0.669434	0.599369	0.690266	0.565821	0.774316	0.721666	0.5725	0.543341	0.773085	0.728403	0.398137	0.478289		0.651636	0.0277662
26	0.774213	0.674111	0.781432	0.759551	0.821935	0.448979	0.557769	0.659732	0.669492	0.579994	0.709477	0.570759	0.749011	0.684276	0.574817	0.53857	0.75915	0.706955	0.391215	0.473854		0.644265	0.0271691
27	0.73159	0.66639	0.765304	0.761865	0.813872	0.45652	0.558841	0.636394	0.663611	0.560296	0.737921	0.583821	0.731902	0.681172	0.578099	0.529985	0.749038	0.701306	0.38919	0.47397		0.638554	0.0262549
28	0.719935	0.658652	0.742926	0.77062	0.799219	0.468696	0.564772	0.634051	0.658236	0.533003	0.759758	0.587383	0.715633	0.693756	0.578098	0.525764	0.748175	0.665861	0.388784	0.475794		0.634456	0.0257005
29	0.73147	0.657435	0.726858	0.779002	0.786478	0.47929	0.567342	0.61819	0.659438	0.521205	0.778903	0.577765	0.702077	0.69035	0.57585	0.525724	0.75683	0.651976	0.383155	0.484681		0.632701	0.0257833
30	0.728743	0.648616	0.713476	0.790592	0.772336	0.483873	0.548898	0.576754	0.642115	0.509894	0.791882	0.566842	0.675721	0.663933	0.567204	0.526542	0.76795	0.644171	0.387615	0.492115		0.624964	0.025804
31	0.72942	0.638215	0.700477	0.787075	0.757364	0.499233	0.532523	0.568127	0.614593	0.503201	0.810923	0.550065	0.66206	0.642607	0.554699	0.522174	0.765467	0.640034	0.414681	0.487227		0.619008	0.025285
32	0.719428	0.637058	0.70167	0.776673	0.755492	0.507289	0.529605	0.550554	0.607721	0.492431	0.846341	0.505718	0.663766	0.614491	0.541038	0.510764	0.761482	0.647035	0.420913	0.484847		0.613716	0.0263648
33	0.71732	0.645681	0.694044	0.772939	0.73808	0.496493	0.517818	0.521239	0.607995	0.475581	0.849078	0.492015	0.667532	0.615271	0.520316	0.50331	0.743856	0.631852	0.422598	0.49278		0.60629	0.0267031
34	0.699608	0.657698	0.684385	0.78477	0.724646	0.496763	0.494903	0.506292	0.597081	0.480853	0.843544	0.4725	0.643131	0.633932	0.517849	0.4932	0.734631	0.623888	0.430559	0.513301		0.601677	0.0264745
35	0.693821	0.664426	0.671175	0.783861	0.718044	0.509087	0.494218	0.504018	0.558988	0.489487	0.835949	0.456176	0.612591	0.656538	0.526844	0.4863	0.723622	0.620232	0.44343	0.522646		0.598573	0.0257754
36	0.694189	0.671792	0.660614	0.767515	0.708392	0.52145	0.495008	0.501557	0.525684	0.490424	0.882537	0.457309	0.595316	0.66233	0.528878	0.490553	0.72577	0.618424	0.449581	0.515403		0.598136	0.0266027
37	0.684985	0.689845	0.644391	0.768591	0.69885	0.543513	0.507944	0.501732	0.4931	0.484783	0.90347	0.471655	0.590594	0.658277	0.534961	0.498948	0.719287	0.646551	0.447002	0.519294		0.600389	0.0268667
38	0.710398	0.703192	0.640031	0.777076	0.687863	0.538281	0.519386	0.492787	0.487693	0.488167	0.889575	0.483582	0.589638	0.636651	0.540685	0.486849	0.695314	0.66687	0.439498	0.526421		0.599998	0.0266728
39	0.718258	0.687981	0.628383	0.771004	0.678477	0.518414	0.521866	0.488758	0.474146	0.490736	0.884329	0.492165	0.584594	0.632372	0.557978	0.473641	0.664432	0.65578	0.440036	0.526128		0.594474	0.0261591
40	0.713327	0.68967	0.62323	0.773657	0.670641	0.508511	0.515328	0.499381	0.453417	0.484159	0.878221	0.492032	0.578477	0.631109	0.561836	0.470261	0.657289	0.653251	0.446837	0.527272		0.591395	0.0261226
41	0.723595	0.678435	0.614051	0.767054	0.661517	0.489208	0.503605	0.504311	0.433623	0.48542	0.875985	0.493589	0.562553	0.619757	0.546373	0.468198	0.643555	0.644093	0.449351	0.537897		0.585109	0.0261744
42	0.739233	0.664529	0.611971	0.740454	0.659517	0.472827	0.49829	0.510443	0.432168	0.497554	0.858872	0.498165	0.549785	0.610324	0.508208	0.465581	0.639784	0.636135	0.464183	0.542359		0.580019	0.0253057
43	0.741491	0.661515	0.625215	0.727493	0.648218	0.463281	0.492887	0.516423	0.426939	0.504387	0.844465	0.501793	0.539592	0.611522	0.495072	0.450221	0.63976	0.634321	0.468996	0.541077		0.576733	0.0250505
44	0.737391	0.653335	0.624145	0.718281	0.649694	0.459835	0.507069	0.514121	0.415691	0.509156	0.81507	0.504131	0.540877	0.611461	0.503943	0.454611	0.648474	0.629897	0.456153	0.534919		0.574413	0.0241246
45	0.726945	0.640795	0.612613	0.714635	0.654003	0.456897	0.511949	0.499141	0.412299	0.507158	0.801991	0.504858	0.537726	0.599038	0.518796	0.466495	0.653651	0.585126	0.456418	0.524656		0.56926	0.0232205
46	0.728777	0.635293	0.613966	0.706337	0.659404	0.450241	0.506155	0.4659	0.422053	0.496159	0.79272	0.50896	0.53969	0.598557	0.541974	0.482935	0.653334	0.573435	0.470669	0.512336		0.567945	0.022831
47	0.737145	0.617798	0.620445	0.700368	0.650158	0.448485	0.50313	0.460227	0.42804	0.495544	0.796239	0.519826	0.533952	0.586708	0.553837	0.503372	0.656202	0.560367	0.479197	0.503682		0.567736	0.0225492
48	0.738909	0.61288	0.62062	0.694958	0.624646	0.462909	0.513845	0.47647	0.425404	0.515567	0.79337	0.533519	0.528573	0.577868	0.573539	0.5225	0.659696	0.576667	0.480626	0.506274		0.571942	0.0214051
49	0.739654	0.607398	0.619849	0.67479	0.60802	0.475465	0.527288	0.482577	0.408552	0.537373	0.804292	0.556126	0.519714	0.578738	0.586096	0.543681	0.67242	0.601859	0.467813	0.514316		0.576301	0.0213691
50	0.73947	0.604631	0.634363	0.677846	0.604722	0.480529	0.537462	0.479819	0.415518	0.54123	0.831439	0.550303	0.512492	0.57223	0.612686	0.562056	0.713204	0.618905	0.459639	0.512082		0.583031	0.0228127
51	0.723725	0.605258	0.642571	0.668919	0.606079	0.471987	0.539821	0.487581	0.415311	0.532449	0.843193	0.514553	0.506631	0.573331	0.620052	0.567431	0.727369	0.62775	0.429734	0.500969		0.580236	0.0239829
52	0.716537	0.608624	0.636755	0.659849	0.601873	0.468026	0.542316	0.48304	0.414778	0.529603	0.889913	0.501598	0.52378	0.575002	0.630951	0.561762	0.700509	0.645451	0.418804	0.504586		0.580688	0.0252102
53	0.707082	0.611933	0.62672	0.644225	0.594821	0.465688	0.536076	0.466677	0.42851	0.524369	0.921729	0.489172	0.526492	0.567181	0.627399	0.560625	0.685183	0.651751	0.406324	0.508963		0.577546	0.0261352
54	0.698835	0.613818	0.620911	0.637229	0.585987	0.459574	0.526817	0.470708	0.430975	0.503227	0.930246	0.487046	0.523599	0.56058	0.6265	0.561562	0.693113	0.658652	0.401181	0.510937		0.575075	0.0266677
55	0.681785	0.622166	0.626794	0.626749	0.580432	0.457495	0.524182	0.491557	0.411024	0.492467	0.970968	0.48866	0.522683	0.537509	0.624527	0.550836	0.686698	0.647459	0.402303	0.51905		0.573267	0.0280092
56	0.666446	0.617862	0.638176	0.627525	0.584292	0.460327	0.530739	0.501328	0.397013	0.483177	1	0.494736	0.518171	0.535895	0.631067	0.531881	0.690155	0.61438	0.392469	0.536596		0.572612	0.0291999
57	0.666543	0.621463	0.643711	0.629825	0.592864	0.467906	0.537913	0.489078	0.392754	0.47424	0.996822	0.493622	0.515323	0.543064	0.651361	0.522888	0.682716	0.568432	0.387946	0.566422		0.572245	0.0293087
58	0.663333	0.614764	0.637562	0.623575	0.597198	0.480523	0.528737	0.478356	0.396703	0.468762	0.969419	0.485893	0.515685	0.558388	0.671499	0.516543	0.672958	0.563958	0.393375	0.565215		0.570122	0.0281905
59	0.65541	0.614644	0.632879	0.623845	0.594393	0.495214	0.508837	0.457694	0.404656	0.46166	0.91406	0.491214	0.528678	0.567022	0.67861	0.514815	0.682922	0.577176	0.399903	0.543231		0.567343	0.0262183
60	0.657619	0.605326	0.633402	0.624489	0.59102	0.513614	0.500537	0.451034	0.405887	0.441304	0.859685	0.500292	0.531099	0.55632	0.664531	0.5247	0.690245	0.58965	0.420278	0.520838		0.564094	0.0241952
61	0.647955	0.592171	0.634377	0.633264	0.585491	0.51114	0.500378	0.458225	0.400626	0.435564	0.817096	0.521395	0.547667	0.526873	0.639804	0.549716	0.692933	0.592509	0.428793	0.516012		0.5616	0.0223986
62	0.63717	0.587971	0.634826	0.645817	0.588283	0.50622	0.50347	0.4663	0.411301	0.432873	0.795725	0.532882	0.558724	0.517254	0.617037	0.569182	0.700179	0.58724	0.445416	0.521198		0.562953	0.0211488
63	0.636387	0.594758	0.643181	0.646171	0.594543	0.508005	0.50514	0.461446	0.425016	0.429097	0.787831	0.543663	0.573731	0.511499	0.58121	0.570643	0.722477	0.588601	0.461037	0.53401		0.565922	0.0208772
64	0.635469	0.60232	0.647808	0.64679	0.595239	0.5196	0.515602	0.460273	0.439889	0.428594	0.784199	0.547585	0.5771	0.498584	0.585164	0.574503	0.73752	0.586407	0.466565	0.543501		0.569636	0.020768
65	0.633032	0.603597	0.66248	0.645173	0.594615	0.546517	0.534433	0.46147	0.439245	0.426723	0.792688	0.55026	0.574564	0.497081	0.603035	0.581491	0.757197	0.584544	0.453508	0.560212		0.575093	0.0215256
66	0.645795	0.60848	0.670656	0.624504	0.590218	0.552958	0.535509	0.455741	0.446331	0.417009	0.800806	0.558651	0.571386	0.497403	0.609618	0.587754	0.784329	0.583834	0.43853	0.578725		0.577912	0.0227554
67	0.642498	0.604096	0.667927	0.618171	0.586364	0.54359	0.530007	0.448813	0.465612	0.417529	0.820699	0.573196	0.563708	0.478369	0.635441	0.569017	0.80104	0.581008	0.419119	0.593404		0.577981	0.0241074
68	0.645741	0.610492	0.665153	0.625177	0.585603	0.547912	0.517982	0.445771	0.44718	0.419127	0.825786	0.596199	0.543306	0.458047	0.651426	0.548733	0.815204	0.587365	0.423291	0.609692		0.578459	0.0253776
69	0.646191	0.61268	0.650792	0.629746	0.590814	0.572748	0.514121	0.444936	0.396749	0.426264	0.830789	0.603138	0.534555	0.460469	0.694567	0.534367	0.800924	0.57228	0.452741	0.618481		0.579368	0.0258757
70	0.646984	0.612345	0.644026	0.635873	0.593956	0.576874	0.527247	0.436959	0.381953	0.431723	0.853694	0.619344	0.509375	0.491118	0.711495	0.52415	0.788374	0.538643	0.467375	0.613464		0.580248	0.0264624
71	0.652819	0.619675	0.64074	0.650479	0.603055	0.568653	0.540363	0.437404	0.38022	0.440185	0.870955	0.617283	0.505519	0.503434	0.715037	0.522878	0.808275	0.513918	0.470242	0.606996		0.583406	0.0274116
72	0.666165	0.623495	0.638663	0.647915	0.611836	0.572087	0.544059	0.45097	0.370807	0.461453	0.859866	0.609092	0.506347	0.494418	0.733052	0.521905	0.863586	0.531888	0.478913	0.607276		0.58969	0.0283188
73	0.687218	0.618633	0.643588	0.633745	0.627657	0.572424	0.547365	0.441833	0.350545	0.466052	0.87105	0.590197	0.503621	0.488176	0.765328	0.523339	0.914859	0.550074	0.477472	0.612023		0.59426	0.0309996
74	0.680508	0.635237	0.644005	0.623821	0.661146	0.567665	0.563631	0.433444	0.354529	0.468887	0.892341	0.580096	0.513379	0.486264	0.777879	0.53296	0.982357	0.560516	0.460621	0.62066		0.601997	0.033697
75	0.66954	0.636075	0.638099	0.598243	0.678651	0.566081	0.574559	0.432499	0.352699	0.471033	0.926378	0.589018	0.519714	0.48606	0.785377	0.542961	0.976059	0.558269	0.448932	0.63198		0.604111	0.0344804
76	0.66386	0.635736	0.645559	0.592539	0.699252	0.559516	0.576787	0.442125	0.343019	0.47581	0.929194	0.593744	0.523421	0.47647	0.777747	0.552139	0.960358	0.55967	0.462084	0.637526		0.605328	0.0340536
77	0.671174	0.64224	0.647313	0.595452	0.707727	0.552191	0.578118	0.456321	0.33279	0.485016	0.919095	0.587963	0.523255	0.47882	0.764195	0.556877	0.907863	0.561298	0.479966	0.635861		0.604177	0.0321071
78	0.677453	0.657451	0.63202	0.607809	0.718665	0.53947	0.571691	0.460841	0.335175	0.500048	0.892341	0.576254	0.520302	0.472098	0.749903	0.553324	0.8874	0.555108	0.47661	0.628162		0.600606	0.0308832
79	0.685275	0.665524	0.629635	0.619512	0.726191	0.525441	0.560748	0.459765	0.340136	0.502124	0.874389	0.566065	0.502482	0.473306	0.721817	0.555323	0.881376	0.570319	0.480256	0.620804		0.598024	0.030184
80	0.680209	0.670398	0.632108	0.623221	0.739113	0.515235	0.566012	0.469141	0.333197	0.502003	0.85787	0.557052	0.503458	0.508029	0.681553	0.576838	0.870926	0.595648	0.504079	0.646577		0.601633	0.0288649
81	0.680484	0.679405	0.637109	0.631215	0.76954	0.508401	0.586058	0.480916	0.328394	0.482231	0.836874	0.56114	0.473402	0.531855	0.678533	0.596593	0.860461	0.625571	0.539229	0.670298		0.607885	0.0287749
82	0.68644	0.693415	0.648783	0.631043	0.778967	0.504283	0.60228	0.494997	0.311291	0.469002	0.829894	0.556534	0.471213	0.551895	0.67358	0.6087	0.874758	0.665293	0.550236	0.697801		0.61502	0.0298545
83	0.679803	0.692089	0.659246	0.640511	0.7949	0.50212	0.605835	0.498786	0.286809	0.453512	0.810256	0.551626	0.474336	0.538231	0.666298	0.614628	0.878922	0.663417	0.552611	0.719272		0.61416	0.0308833
84	0.678937	0.689985	0.674823	0.649428	0.811017	0.501853	0.591912	0.496257	0.268772	0.450623	0.794266	0.535742	0.466141	0.509487	0.659217	0.619392	0.8776	0.674507	0.548134	0.733286		0.611569	0.0321034
85	0.674606	0.694225	0.678723	0.655717	0.825661	0.505968	0.582037	0.503265	0.267915	0.455273	0.780899	0.530016	0.462523	0.512256	0.647891	0.617699	0.923049	0.692454	0.524599	0.745991		0.614038	0.0335297
86	0.675626	0.686987	0.688509	0.67277	0.84453	0.510279	0.577223	0.499988	0.271131	0.463065	0.756753	0.52014	0.455408	0.52256	0.618095	0.613134	0.938549	0.70761	0.514341	0.740745		0.613872	0.0340098
87	0.677941	0.674119	0.693473	0.675566	0.853268	0.517188	0.581123	0.497658	0.278644	0.496362	0.735865	0.512653	0.45339	0.521401	0.599211	0.60911	0.931673	0.713146	0.503157	0.737036		0.613099	0.0333734
88	0.67013	0.691143	0.707222	0.679398	0.868567	0.505173	0.595228	0.511499	0.278396	0.509043	0.72136	0.524128	0.444248	0.510335	0.596799	0.601903	0.921841	0.72655	0.490935	0.739397		0.614665	0.0336829
89	0.67216	0.694457	0.70644	0.68497	0.873707	0.49448	0.608696	0.521194	0.27575	0.509954	0.690468	0.523876	0.44038	0.4911	0.596577	0.593352	0.914521	0.737971	0.493543	0.744766		0.613418	0.0338838
90	0.6777	0.693446	0.702631	0.691858	0.871557	0.49116	0.619558	0.528101	0.268783	0.497261	0.6761	0.506025	0.453103	0.475326	0.60763	0.593284	0.924733	0.741462	0.476258	0.763861		0.612992	0.0348395
91	0.677004	0.710734	0.705437	0.698727	0.878593	0.499796	0.644993	0.536644	0.25667	0.499517	0.667373	0.492311	0.4439	0.473299	0.618007	0.594398	0.929723	0.752058	0.485189	0.774064		0.616922	0.0358074
92	0.664633	0.717317	0.715518	0.713299	0.876446	0.508103	0.661564	0.545059	0.258932	0.505261	0.66294	0.495575	0.441759	0.478221	0.620882	0.58868	0.92624	0.779069	0.513957	0.754645		0.621405	0.0354317
93	0.6519	0.72438	0.72462	0.720084	0.876384	0.520464	0.679732	0.559325	0.26703	0.503637	0.66564	0.498935	0.442291	0.455325	0.616253	0.585116	0.935011	0.816493	0.543794	0.740334		0.626337	0.0358317
94	0.649285	0.73024	0.728987	0.719823	0.876708	0.54944	0.70196	0.598833	0.267571	0.510647	0.677514	0.497685	0.446224	0.452798	0.620004	0.583412	0.949028	0.8315	0.569895	0.737645		0.63496	0.0359711
95	0.648473	0.727398	0.741393	0.711078	0.875657	0.580921	0.719309	0.606781	0.28061	0.538304	0.701492	0.500688	0.442851	0.468713	0.629517	0.581605	0.955102	0.80769	0.578429	0.743788		0.64199	0.0350102
96	0.650537	0.700988	0.752807	0.704951	0.88157	0.587038	0.729345	0.62351	0.295897	0.52241	0.712468	0.494755	0.439319	0.472777	0.641236	0.578547	0.941924	0.777127	0.565819	0.742754		0.640789	0.0342897
97	0.653515	0.679277	0.782593	0.694427	0.876989	0.594059	0.73649	0.628549	0.300411	0.496495	0.755553	0.483705	0.435719	0.477473	0.67331	0.582344	0.938478	0.772309	0.537254	0.724027		0.641149	0.0349133
98	0.651736	0.662525	0.786592	0.690138	0.86999	0.606757	0.721347	0.636833	0.308236	0.491119	0.781247	0.48292	0.442438	0.480779	0.687458	0.584228	0.92782	0.779912	0.519281	0.710632		0.6411	0.0345586
99	0.643697	0.644328	0.762067	0.690448	0.859368	0.61204	0.700603	0.626563	0.310711	0.467087	0.781426	0.492187	0.457924	0.466314	0.710826	0.591167	0.912452	0.799398	0.489121	0.702382		0.636005	0.0343017
100	0.637649	0.611191	0.742989	0.680165	0.852949	0.609429	0.678213	0.610651	0.313624	0.4429	0.768732	0.496976	0.462798	0.45317	0.716412	0.600581	0.912027	0.812843	0.488437	0.703685		0.629771	0.0342807
