# Supplementary material for: Concerted action of neuroepithelial basal shrinkage and active epithelial migration ensures efficient optic cup morphogenesis
Source: eLife. 2017 Apr 4;6:e22689. doi: 10.7554/eLife.22689 (PMC5380436; doi:10.7554/eLife.22689)
Supplement: Figure 5—source data 1. — DOI: http://dx.doi.org/10.7554/eLife.22689.044 [file elife-22689-fig5-data1.xlsx]

## Sheet: Control
Figure 5-source data 1
Normalised average intensity distribution : phalloidin - Control
Basal to apical position in RNE	section 1	section 2	section 3	section 4	section 5	section 6	section 7	section 8	section 9	section 10	section 11	section 12	section 13	section 14	section 15	section 16	section 17	section 18	section 19	section 20	section 21	section 22	section 23	section 24	section 25		Mean	SEM
1	0.675763	0.851218	0.987716	0.718513	0.788209	0.789871	0.806447	0.786413	0.736433	0.707247	0.771031	0.920539	1	0.736405	0.889221	0.508723	0.722614	0.820685	0.748082	0.772678	0.652791	0.72702	1	0.60416	0.434914		0.766268	0.0272431
2	0.753736	0.947668	0.984629	0.959674	0.847572	0.839718	0.840657	0.808026	0.830352	0.748847	0.870283	0.924401	0.973071	0.934148	0.880983	0.706916	0.872574	0.753364	0.840076	0.897534	0.723525	0.747401	0.995751	0.552154	0.467531		0.828024	0.0256267
3	0.766223	1	0.93652	1	0.86427	0.84288	0.852902	0.846058	0.854993	0.769459	0.85837	0.929981	0.829293	0.987751	0.907922	0.804747	0.84397	0.704245	0.827744	0.970749	0.753084	0.759418	0.969714	0.532794	0.52033		0.837337	0.0248712
4	0.786584	0.93936	0.917486	0.894211	0.876271	0.838712	0.862271	0.911796	0.855025	0.805509	0.862598	0.9545	0.746132	0.933694	0.931404	0.857185	0.856074	0.700097	0.829636	1	0.803412	0.81384	0.938414	0.506299	0.565301		0.839433	0.0228753
5	0.846641	0.848923	0.941437	0.841044	0.89428	0.829629	0.877024	0.956748	0.865259	0.837849	0.87147	0.944458	0.736584	0.938474	0.951113	0.890747	0.8956	0.698343	0.885356	0.962735	0.847157	0.840822	0.874724	0.499454	0.624614		0.848019	0.0215491
6	0.907658	0.828518	0.968505	0.824514	0.91019	0.83797	0.907921	1	0.880212	0.856379	0.902825	0.933896	0.751046	0.965496	0.966092	0.923389	0.916855	0.710964	0.91887	0.935982	0.909642	0.904163	0.845307	0.520498	0.696081		0.868919	0.0210809
7	0.926952	0.824059	0.991796	0.813765	0.934426	0.847543	0.938549	0.98282	0.876312	0.900466	0.951832	0.925037	0.767896	0.983744	0.961532	0.945259	0.955143	0.734943	0.931263	0.893116	0.944245	0.963255	0.784685	0.558264	0.771487		0.884336	0.0202708
8	0.948929	0.847118	1	0.821486	0.94903	0.86319	0.944777	0.93809	0.876163	0.939224	0.974001	0.93992	0.764264	0.995821	0.961334	0.968595	0.975483	0.76825	0.978252	0.810353	0.960824	0.983944	0.756874	0.603035	0.828278		0.89589	0.019798
9	0.976129	0.87514	0.994352	0.820507	0.984209	0.886515	0.96689	0.924824	0.904651	0.951191	1	0.967688	0.783034	0.996442	0.965764	0.978128	0.990211	0.808319	0.997444	0.77469	0.962252	1	0.708401	0.660887	0.870207		0.909915	0.0196878
10	0.991608	0.907018	0.971322	0.827517	1	0.901018	0.990388	0.920625	0.945596	0.966122	0.985629	1	0.793055	0.994441	0.972073	0.982498	0.995459	0.836439	1	0.747322	0.954178	0.994345	0.699092	0.737315	0.911119		0.920967	0.0186092
11	1	0.917509	0.945426	0.819757	0.982361	0.918984	1	0.927593	0.942234	0.976078	0.975497	0.975987	0.825032	1	0.989518	0.98946	1	0.866949	0.993734	0.740909	0.954119	0.954172	0.678173	0.789111	0.956639		0.92477	0.0176928
12	0.993455	0.92877	0.918651	0.798819	0.960438	0.947403	0.971422	0.930837	0.944591	0.981046	0.947815	0.945913	0.856765	0.986128	1	0.992981	0.99201	0.890281	0.984131	0.733977	0.989491	0.908656	0.661103	0.814974	0.978898		0.922342	0.0174315
13	0.991721	0.93202	0.875641	0.796762	0.931101	0.977222	0.96231	0.921951	0.961516	0.98928	0.895011	0.951368	0.864268	0.951531	0.982323	1	0.994386	0.909039	0.978231	0.724195	0.998047	0.892327	0.62291	0.835138	1		0.917532	0.0185339
14	0.998425	0.883754	0.839028	0.801439	0.916513	0.998906	0.91778	0.919724	0.995593	0.99317	0.869355	0.926161	0.846794	0.949854	0.981986	0.989418	0.980706	0.906381	0.972917	0.715717	0.998775	0.879826	0.610213	0.885969	0.993775		0.910887	0.0191319
15	0.968962	0.810773	0.820497	0.800787	0.875893	1	0.836176	0.911276	1	1	0.837377	0.875594	0.835364	0.989083	0.977216	0.975215	0.960167	0.908297	0.973902	0.711048	1	0.862897	0.574116	0.916544	0.983528		0.896189	0.0208659
16	0.96266	0.764172	0.803052	0.792366	0.841249	0.992313	0.797742	0.896005	0.989784	0.99315	0.832623	0.846379	0.829409	0.976634	0.979202	0.962177	0.930313	0.951975	0.969235	0.717942	0.994299	0.838122	0.550226	0.930024	0.969149		0.884408	0.0218777
17	0.944948	0.708578	0.780276	0.771612	0.808368	0.975282	0.752316	0.889894	0.968205	0.973022	0.831815	0.83726	0.799059	0.938932	0.981432	0.939316	0.905323	0.981718	0.938625	0.723167	0.979563	0.794562	0.505688	0.950246	0.959741		0.865558	0.0235493
18	0.934425	0.65357	0.750454	0.736718	0.77378	0.953852	0.735318	0.891714	0.916462	0.960146	0.795804	0.831205	0.727378	0.891942	0.963125	0.924787	0.887557	1	0.888035	0.724132	0.957695	0.77132	0.486076	0.983209	0.969705		0.844337	0.0250888
19	0.936261	0.604818	0.739307	0.696702	0.761833	0.938785	0.730463	0.883031	0.868629	0.927311	0.783096	0.824229	0.683006	0.872286	0.934829	0.920425	0.857516	0.964625	0.876905	0.731742	0.94458	0.742959	0.441232	1	0.962827		0.825096	0.0265038
20	0.938893	0.57662	0.717232	0.664599	0.747582	0.94432	0.719189	0.847435	0.845775	0.907073	0.765639	0.802974	0.668362	0.852557	0.902657	0.938386	0.843533	0.914987	0.859928	0.7269	0.909393	0.721934	0.426556	0.999959	0.9441		0.807463	0.0268387
21	0.929346	0.549358	0.701161	0.627324	0.737139	0.925511	0.701658	0.818958	0.798572	0.88592	0.755715	0.801195	0.646537	0.801198	0.868321	0.898131	0.809218	0.90169	0.812069	0.729983	0.875847	0.707573	0.404499	0.96586	0.913612		0.782656	0.0263045
22	0.940215	0.537022	0.677302	0.606641	0.734292	0.909295	0.695352	0.789603	0.76997	0.85135	0.745526	0.794915	0.625865	0.778523	0.859458	0.877149	0.772558	0.912587	0.798244	0.733824	0.833808	0.685564	0.396803	0.94063	0.892674		0.766367	0.0261435
23	0.915334	0.520575	0.665185	0.586284	0.720938	0.906063	0.688561	0.759053	0.741628	0.834881	0.724963	0.790089	0.608393	0.754447	0.861332	0.846472	0.745863	0.865363	0.77498	0.712753	0.78794	0.673897	0.374768	0.943012	0.871698		0.746979	0.026125
24	0.875543	0.50655	0.661616	0.553578	0.697751	0.892604	0.68093	0.755307	0.72734	0.82237	0.71852	0.805042	0.603515	0.726703	0.886466	0.810669	0.719557	0.817956	0.749763	0.689287	0.774789	0.642806	0.363794	0.945389	0.854358		0.731288	0.0262732
25	0.843711	0.499561	0.660281	0.535292	0.676083	0.87479	0.670145	0.754787	0.708246	0.803214	0.699094	0.827102	0.606751	0.695094	0.90047	0.778184	0.70365	0.781462	0.746617	0.688954	0.764773	0.584233	0.339685	0.94855	0.826801		0.716701	0.0268856
26	0.81415	0.492865	0.657562	0.525079	0.658566	0.877575	0.659642	0.747353	0.699437	0.796895	0.67353	0.858962	0.603347	0.672806	0.906906	0.741529	0.693119	0.734124	0.738393	0.687397	0.750009	0.562974	0.326426	0.951131	0.798302		0.705123	0.0274221
27	0.785319	0.483581	0.667902	0.519928	0.641352	0.888578	0.651991	0.729926	0.691966	0.776885	0.659712	0.849591	0.595598	0.66877	0.895602	0.710802	0.686491	0.686399	0.7143	0.662363	0.73212	0.534116	0.307939	0.93976	0.793161		0.690966	0.0276398
28	0.768296	0.4806	0.674608	0.518169	0.630138	0.876966	0.649977	0.714878	0.683766	0.766029	0.647668	0.842452	0.575481	0.668042	0.857019	0.684661	0.66433	0.639138	0.694743	0.649259	0.705812	0.504322	0.304376	0.92456	0.786408		0.676468	0.02711
29	0.773653	0.47639	0.672726	0.515324	0.618424	0.864635	0.644709	0.704447	0.672148	0.759772	0.639228	0.825844	0.563346	0.679512	0.817753	0.656065	0.638355	0.615932	0.684291	0.659424	0.673261	0.502001	0.29414	0.896715	0.766078		0.664567	0.0262982
30	0.771015	0.474623	0.677777	0.51725	0.604569	0.86499	0.642499	0.691821	0.660009	0.742157	0.622152	0.783711	0.564209	0.6579	0.780102	0.637067	0.62128	0.576597	0.650861	0.667516	0.626511	0.503295	0.283312	0.885515	0.737424		0.649766	0.0255543
31	0.74419	0.475722	0.679881	0.510126	0.603772	0.835417	0.629292	0.686677	0.650738	0.708928	0.616335	0.752467	0.561009	0.642938	0.756206	0.625184	0.620862	0.55304	0.630643	0.668333	0.586828	0.482481	0.258488	0.871409	0.715869		0.634674	0.0250582
32	0.718668	0.473344	0.680727	0.507366	0.601437	0.819282	0.627858	0.682792	0.651255	0.696084	0.598126	0.73324	0.564811	0.626275	0.724037	0.618801	0.628599	0.543889	0.616899	0.652577	0.569132	0.469667	0.252369	0.858078	0.698314		0.624545	0.0243322
33	0.700982	0.466009	0.68487	0.502245	0.596595	0.800057	0.632116	0.683763	0.6411	0.67374	0.587865	0.714485	0.560542	0.616763	0.725023	0.615961	0.617977	0.540703	0.621804	0.614543	0.540389	0.454603	0.249252	0.83943	0.684284		0.614604	0.02389
34	0.684273	0.472894	0.686464	0.510187	0.596507	0.769717	0.639912	0.687004	0.63121	0.654097	0.575508	0.705497	0.56367	0.623514	0.725524	0.616464	0.608111	0.554532	0.610631	0.594874	0.50735	0.44807	0.251172	0.801649	0.664384		0.607329	0.0227081
35	0.671374	0.487426	0.689036	0.522523	0.597104	0.744035	0.644918	0.682345	0.618679	0.64576	0.56969	0.697996	0.561155	0.638691	0.713344	0.598891	0.605205	0.54639	0.590181	0.58873	0.482348	0.429719	0.254122	0.777897	0.644084		0.600066	0.0219565
36	0.656395	0.499976	0.696979	0.535365	0.602257	0.710676	0.663288	0.682491	0.617405	0.631263	0.566914	0.685743	0.579395	0.652581	0.699556	0.589106	0.602727	0.537865	0.604995	0.586055	0.457494	0.413166	0.251018	0.749862	0.62503		0.595904	0.0214684
37	0.651822	0.501752	0.70666	0.540571	0.603598	0.689587	0.670926	0.683094	0.61292	0.619825	0.568587	0.678318	0.579636	0.657112	0.69929	0.583262	0.59685	0.531392	0.621374	0.575823	0.437007	0.403956	0.241527	0.68996	0.623442		0.590732	0.0213882
38	0.647957	0.500552	0.717169	0.543189	0.601554	0.654297	0.680645	0.686763	0.61214	0.612887	0.572574	0.65964	0.590335	0.659962	0.6967	0.581724	0.581841	0.518232	0.635019	0.578583	0.427542	0.377586	0.237679	0.621496	0.616586		0.584506	0.021527
39	0.634687	0.495577	0.724166	0.539273	0.602854	0.637674	0.689057	0.685047	0.619536	0.602461	0.567363	0.642545	0.594314	0.662195	0.684397	0.583884	0.584647	0.497587	0.642645	0.576551	0.422498	0.369148	0.235971	0.561212	0.595351		0.578026	0.0216877
40	0.620209	0.492417	0.726012	0.534818	0.601005	0.638989	0.681358	0.671924	0.622658	0.590392	0.567626	0.638931	0.595441	0.666907	0.670249	0.581616	0.583531	0.494523	0.646675	0.580465	0.416236	0.353723	0.236883	0.524521	0.579754		0.572674	0.021834
41	0.605366	0.494587	0.729574	0.528447	0.609762	0.627761	0.675431	0.66592	0.618476	0.584793	0.566677	0.618611	0.605366	0.669627	0.6446	0.573748	0.579207	0.498344	0.630725	0.584293	0.401403	0.3234	0.233138	0.499631	0.556954		0.565034	0.0222632
42	0.61291	0.488273	0.734661	0.527465	0.619418	0.617201	0.672451	0.665774	0.622809	0.570935	0.557723	0.623894	0.616742	0.669192	0.618917	0.557166	0.567533	0.500495	0.635566	0.583506	0.383611	0.308183	0.231458	0.462511	0.535763		0.559366	0.0230697
43	0.596925	0.484668	0.731427	0.537388	0.623587	0.611891	0.67527	0.667563	0.62695	0.5646	0.558085	0.627675	0.617653	0.676415	0.611783	0.548431	0.572103	0.517419	0.635879	0.574917	0.364347	0.279733	0.222835	0.419559	0.512732		0.554393	0.0243902
44	0.580254	0.484965	0.721601	0.530974	0.616571	0.598236	0.679018	0.665857	0.6295	0.556984	0.567193	0.624719	0.626232	0.682626	0.612231	0.546596	0.574918	0.509858	0.637446	0.571088	0.35279	0.269246	0.217571	0.385405	0.497581		0.549578	0.025156
45	0.569316	0.467707	0.721312	0.533556	0.616546	0.585696	0.68658	0.674918	0.626819	0.545013	0.563674	0.603107	0.640505	0.690761	0.607191	0.536419	0.566723	0.495822	0.631601	0.571326	0.340706	0.257046	0.209452	0.362217	0.475648		0.543186	0.0262258
46	0.570955	0.465631	0.726685	0.51993	0.617011	0.581551	0.690544	0.671753	0.625924	0.544261	0.555851	0.590145	0.652902	0.684265	0.601226	0.539972	0.547082	0.491154	0.620686	0.579167	0.333551	0.245299	0.206882	0.338959	0.45954		0.538437	0.0269148
47	0.57895	0.461414	0.736879	0.493313	0.622091	0.583669	0.680551	0.677176	0.621948	0.54247	0.556773	0.582974	0.653501	0.682581	0.591731	0.541896	0.535035	0.49333	0.610942	0.565196	0.338746	0.241102	0.200034	0.323928	0.44381		0.534401	0.0273569
48	0.568737	0.458987	0.735138	0.473945	0.630847	0.589544	0.678272	0.688472	0.620071	0.544415	0.555271	0.568193	0.641471	0.68049	0.593367	0.527394	0.532203	0.501873	0.593908	0.552109	0.347047	0.239894	0.196317	0.31571	0.433712		0.530696	0.0274354
49	0.572372	0.461261	0.739556	0.46865	0.63181	0.60086	0.676365	0.689928	0.619348	0.543042	0.549657	0.557547	0.633306	0.684477	0.595523	0.504851	0.525224	0.513511	0.585004	0.52833	0.346026	0.242454	0.193397	0.321347	0.425818		0.528387	0.0274719
50	0.568434	0.46819	0.73992	0.470587	0.618821	0.598236	0.663418	0.713219	0.61858	0.541231	0.549788	0.562067	0.6372	0.68396	0.590605	0.495771	0.518445	0.521206	0.59418	0.520141	0.344178	0.238108	0.192046	0.312877	0.431316		0.527701	0.0277297
51	0.565766	0.467146	0.739146	0.4683	0.620731	0.612554	0.65651	0.728556	0.617807	0.540429	0.541865	0.559061	0.65507	0.684457	0.563043	0.497001	0.508418	0.535087	0.591367	0.52027	0.353751	0.225115	0.194302	0.308088	0.436628		0.527619	0.0280662
52	0.555015	0.469316	0.745507	0.467059	0.624528	0.62531	0.649877	0.746269	0.612651	0.541384	0.540581	0.553544	0.648301	0.685541	0.564391	0.500139	0.505735	0.550152	0.579384	0.518656	0.359478	0.216413	0.195514	0.318159	0.414265		0.527487	0.0283648
53	0.541561	0.466046	0.743037	0.452725	0.616886	0.622965	0.636482	0.753125	0.612348	0.538504	0.54943	0.555737	0.643465	0.684073	0.564909	0.50072	0.502786	0.582625	0.561937	0.510357	0.360864	0.213052	0.191652	0.325636	0.405554		0.525459	0.0284216
54	0.536303	0.465508	0.737948	0.445081	0.613495	0.624739	0.633335	0.759969	0.609545	0.543882	0.553885	0.546474	0.627933	0.680332	0.570483	0.507438	0.490015	0.594923	0.564361	0.515558	0.360916	0.205949	0.188629	0.337296	0.399923		0.524557	0.0284755
55	0.537824	0.473988	0.726135	0.437473	0.600761	0.611597	0.623219	0.765621	0.610727	0.543718	0.54252	0.542021	0.628461	0.679483	0.583716	0.509543	0.490599	0.600349	0.561003	0.505521	0.356254	0.203054	0.185044	0.349539	0.388726		0.522276	0.0283908
56	0.545866	0.478786	0.714862	0.436065	0.576801	0.61487	0.622927	0.766506	0.611845	0.540597	0.541754	0.536265	0.624823	0.676932	0.582226	0.514074	0.493005	0.592338	0.548149	0.508154	0.362895	0.199779	0.182678	0.351411	0.372025		0.519825	0.0282345
57	0.546862	0.482789	0.712239	0.441581	0.561109	0.614581	0.623807	0.763908	0.615272	0.550033	0.530052	0.526613	0.622788	0.686103	0.575187	0.504059	0.493059	0.585834	0.551148	0.512848	0.366519	0.197589	0.179882	0.343803	0.348015		0.517427	0.028502
58	0.54429	0.485176	0.716563	0.448862	0.54944	0.604848	0.616739	0.756341	0.62252	0.556562	0.516626	0.525703	0.614681	0.686839	0.586459	0.489115	0.488339	0.596158	0.545664	0.494071	0.353012	0.200839	0.179838	0.348096	0.331543		0.514333	0.0285978
59	0.552853	0.484046	0.698666	0.458286	0.545019	0.593243	0.614305	0.744004	0.626791	0.559421	0.50756	0.525542	0.618705	0.686751	0.596563	0.491928	0.485059	0.608506	0.540565	0.473298	0.34717	0.207391	0.180729	0.361844	0.318195		0.513058	0.0282665
60	0.568701	0.485242	0.684334	0.457082	0.539769	0.583661	0.60849	0.734712	0.626558	0.56597	0.498895	0.522548	0.612347	0.684391	0.597533	0.49087	0.489842	0.616166	0.535282	0.470137	0.34684	0.209653	0.183628	0.369459	0.303593		0.511428	0.0279653
61	0.578695	0.490159	0.666756	0.451941	0.536286	0.579555	0.592403	0.73456	0.634897	0.567633	0.489775	0.519786	0.610642	0.682443	0.604138	0.481352	0.493015	0.626314	0.534831	0.456897	0.348666	0.209172	0.188154	0.390578	0.289228		0.510315	0.027843
62	0.576606	0.486758	0.648335	0.438579	0.527519	0.584507	0.587492	0.737367	0.640752	0.576905	0.482684	0.506812	0.617593	0.679686	0.606757	0.476827	0.489137	0.637141	0.535548	0.456125	0.345565	0.207418	0.191265	0.396463	0.278492		0.508493	0.0280686
63	0.577959	0.486574	0.633045	0.438508	0.528535	0.582096	0.580434	0.734982	0.64477	0.580351	0.470379	0.509039	0.622247	0.679465	0.614206	0.475577	0.495758	0.625019	0.537735	0.455793	0.353521	0.206985	0.196879	0.393892	0.283404		0.508286	0.0277135
64	0.583004	0.486864	0.618498	0.4503	0.527838	0.579526	0.576936	0.736279	0.650441	0.585163	0.462399	0.505175	0.628548	0.678898	0.614158	0.477581	0.5039	0.610026	0.546533	0.461735	0.352802	0.202222	0.199435	0.40364	0.280822		0.508909	0.0276158
65	0.587794	0.492711	0.619754	0.449599	0.525937	0.581722	0.570817	0.738026	0.661152	0.594676	0.467472	0.515886	0.631793	0.679871	0.642714	0.479703	0.504324	0.599634	0.547548	0.453903	0.348965	0.198988	0.199457	0.392446	0.279397		0.510571	0.0281641
66	0.601402	0.496223	0.618447	0.445263	0.525427	0.563773	0.574046	0.74344	0.665601	0.605519	0.480689	0.522131	0.64325	0.681291	0.705097	0.486344	0.511727	0.58631	0.544878	0.438335	0.337118	0.197375	0.197201	0.386142	0.280933		0.513518	0.0291956
67	0.614942	0.497526	0.620386	0.443034	0.538118	0.545206	0.573175	0.735483	0.674404	0.611228	0.48416	0.532113	0.64812	0.675148	0.715901	0.48501	0.521965	0.576682	0.543244	0.425822	0.326601	0.196315	0.198274	0.384621	0.283626		0.514044	0.0294689
68	0.612373	0.487041	0.60809	0.436747	0.546219	0.539325	0.571527	0.734274	0.677234	0.614616	0.501461	0.537699	0.647527	0.684035	0.696793	0.478186	0.528475	0.56389	0.550733	0.408658	0.334693	0.199581	0.199033	0.388509	0.285926		0.513306	0.0291768
69	0.61234	0.484376	0.601482	0.435348	0.557259	0.527358	0.572824	0.728823	0.676284	0.614849	0.502227	0.536646	0.637587	0.696175	0.695944	0.483507	0.536168	0.549792	0.556839	0.400159	0.34014	0.203933	0.198011	0.387304	0.283849		0.512769	0.0290823
70	0.614324	0.482574	0.589932	0.429777	0.567405	0.529047	0.568444	0.729574	0.678602	0.611475	0.500449	0.535952	0.636193	0.686315	0.705899	0.490843	0.540633	0.541744	0.561732	0.392633	0.328921	0.207099	0.195784	0.375022	0.281		0.511255	0.0293621
71	0.598847	0.479756	0.586598	0.432827	0.572647	0.531005	0.567059	0.728391	0.679829	0.608424	0.49864	0.54226	0.641601	0.688839	0.709004	0.491807	0.548295	0.539273	0.575594	0.394679	0.318102	0.208514	0.195368	0.37645	0.28557		0.511975	0.0294286
72	0.585377	0.482711	0.575749	0.425493	0.5784	0.534221	0.561631	0.714142	0.670464	0.605132	0.507261	0.543252	0.638621	0.684369	0.711295	0.500887	0.564444	0.52422	0.56868	0.387407	0.307578	0.21459	0.194441	0.374858	0.301589		0.510273	0.0289284
73	0.578875	0.482255	0.563185	0.422906	0.593012	0.546461	0.558904	0.718417	0.658126	0.599707	0.517323	0.55231	0.626588	0.668295	0.713609	0.502058	0.57501	0.526767	0.576456	0.376964	0.307103	0.214408	0.198055	0.3763	0.319538		0.510905	0.0285361
74	0.588828	0.484404	0.564518	0.41809	0.58452	0.566364	0.559701	0.716771	0.648365	0.59493	0.51305	0.565752	0.629571	0.677139	0.719354	0.500334	0.58503	0.518863	0.585809	0.372253	0.307455	0.214643	0.198004	0.383457	0.329183		0.513056	0.0286467
75	0.586696	0.48289	0.566321	0.427068	0.578568	0.575136	0.565249	0.710615	0.647556	0.581941	0.508383	0.57515	0.630587	0.678257	0.732601	0.511145	0.591385	0.517526	0.58979	0.368576	0.302143	0.220846	0.200034	0.389732	0.329732		0.514717	0.0286358
76	0.578527	0.483768	0.561575	0.420867	0.564156	0.573698	0.567851	0.712953	0.637831	0.574843	0.507003	0.578095	0.643071	0.675362	0.727503	0.525567	0.591588	0.51733	0.596703	0.372667	0.295022	0.227247	0.204779	0.382815	0.32876		0.513983	0.0284707
77	0.571608	0.482614	0.553199	0.421245	0.559106	0.575133	0.560829	0.711868	0.623076	0.559275	0.504328	0.587157	0.65014	0.658544	0.717592	0.521665	0.584126	0.509146	0.603115	0.37469	0.287402	0.235264	0.214023	0.367688	0.317801		0.510025	0.0280687
78	0.562709	0.482918	0.534155	0.411557	0.543793	0.569987	0.562863	0.710054	0.613596	0.544892	0.481335	0.58155	0.651716	0.640488	0.701143	0.513656	0.589516	0.503065	0.606152	0.380188	0.276698	0.237459	0.217652	0.362345	0.313617		0.503724	0.0276562
79	0.567036	0.485145	0.508054	0.406241	0.533685	0.572668	0.570295	0.701247	0.606273	0.53679	0.466122	0.583338	0.652642	0.627826	0.699092	0.51134	0.595264	0.504281	0.609775	0.380906	0.275378	0.239893	0.226106	0.36551	0.318135		0.501722	0.0272372
80	0.567412	0.481314	0.494926	0.408365	0.526432	0.572485	0.577424	0.707577	0.600556	0.527033	0.458507	0.591552	0.653002	0.610522	0.708747	0.500992	0.603438	0.49357	0.621376	0.382742	0.271602	0.246019	0.229129	0.372488	0.322454		0.501187	0.0272492
81	0.573214	0.475561	0.48638	0.406259	0.516533	0.580481	0.582433	0.716987	0.586291	0.526279	0.441679	0.590091	0.653284	0.584297	0.704696	0.490792	0.608515	0.499641	0.618116	0.394816	0.269668	0.24764	0.232371	0.388301	0.321689		0.499841	0.0269946
82	0.569228	0.467303	0.486881	0.393405	0.503106	0.594868	0.588332	0.707301	0.57505	0.526541	0.432601	0.58572	0.64918	0.556973	0.672295	0.493875	0.615576	0.503572	0.611827	0.394398	0.271492	0.239232	0.232532	0.40609	0.319322		0.495868	0.0264718
83	0.561001	0.461902	0.481487	0.393454	0.503342	0.604455	0.594058	0.710758	0.571766	0.519208	0.425683	0.58025	0.641606	0.534993	0.654675	0.489108	0.62298	0.509804	0.598544	0.390479	0.269037	0.230796	0.233539	0.423983	0.307132		0.492561	0.026432
84	0.562213	0.449892	0.476076	0.388644	0.509113	0.61905	0.591438	0.704694	0.568907	0.528805	0.421803	0.568686	0.644857	0.518974	0.663466	0.488935	0.6132	0.52101	0.599562	0.378279	0.27673	0.226778	0.236891	0.439543	0.308341		0.492235	0.0264279
85	0.57184	0.439198	0.473872	0.387308	0.504063	0.61487	0.587395	0.702769	0.561709	0.537806	0.415123	0.559535	0.637978	0.514248	0.679244	0.484512	0.601178	0.524584	0.589411	0.37559	0.283949	0.227709	0.253735	0.454789	0.30087		0.491331	0.0260576
86	0.568897	0.43493	0.473492	0.397767	0.497739	0.623931	0.583645	0.707266	0.567852	0.550692	0.419444	0.548401	0.632426	0.513923	0.695948	0.477892	0.589398	0.543886	0.577365	0.380392	0.288609	0.22293	0.261649	0.476472	0.282751		0.492708	0.0262352
87	0.571754	0.430355	0.471209	0.399532	0.501249	0.638619	0.577432	0.705494	0.561187	0.549639	0.432069	0.534103	0.635631	0.526307	0.69155	0.479648	0.576626	0.55611	0.570034	0.388641	0.295471	0.225993	0.278829	0.533858	0.274507		0.496234	0.0258307
88	0.58164	0.426741	0.484401	0.392916	0.518192	0.653052	0.572184	0.704231	0.558579	0.549531	0.435811	0.540053	0.63216	0.537334	0.689754	0.475884	0.576585	0.568995	0.567106	0.405717	0.308535	0.235024	0.286109	0.60649	0.272808		0.503193	0.0258463
89	0.591046	0.422319	0.533873	0.404476	0.525153	0.656443	0.56921	0.709968	0.546038	0.545374	0.433382	0.545724	0.621473	0.542473	0.698304	0.472875	0.57894	0.584526	0.571367	0.411921	0.314402	0.231561	0.304194	0.687856	0.266502		0.510776	0.0265797
90	0.587475	0.418014	0.563719	0.413102	0.525486	0.661331	0.565238	0.715246	0.544409	0.536909	0.428203	0.550122	0.607393	0.548484	0.704422	0.479603	0.576448	0.584437	0.569573	0.418982	0.326954	0.232757	0.318278	0.737442	0.269543		0.515343	0.0268548
91	0.596082	0.418248	0.586404	0.426831	0.519575	0.65093	0.564337	0.729476	0.539127	0.532438	0.427064	0.54978	0.6103	0.558052	0.68337	0.474002	0.570206	0.584681	0.565744	0.41656	0.342604	0.246621	0.356062	0.740514	0.275709		0.518589	0.0258684
92	0.606954	0.416946	0.58752	0.437731	0.522783	0.633333	0.558384	0.729429	0.545184	0.517605	0.42896	0.553495	0.611497	0.567476	0.720578	0.478574	0.558141	0.578505	0.562416	0.426503	0.353664	0.255526	0.376433	0.725908	0.277564		0.521244	0.0253343
93	0.608633	0.422891	0.544722	0.453915	0.515687	0.614385	0.554058	0.740855	0.553235	0.508516	0.429558	0.538703	0.610089	0.607122	0.75767	0.486828	0.545199	0.574862	0.548568	0.441533	0.351119	0.272109	0.417181	0.731661	0.269172		0.523931	0.0252546
94	0.606327	0.438096	0.530849	0.468671	0.500928	0.606638	0.549328	0.760908	0.560454	0.501437	0.434529	0.54095	0.611407	0.658374	0.736388	0.474496	0.520982	0.558696	0.547307	0.459769	0.344573	0.281056	0.445839	0.772259	0.255179		0.526618	0.0258751
95	0.615348	0.463929	0.543137	0.49588	0.495627	0.596289	0.541679	0.771114	0.564761	0.486592	0.436915	0.551034	0.613224	0.640307	0.687027	0.493331	0.514316	0.552536	0.548064	0.489234	0.366692	0.301587	0.528066	0.819095	0.243018		0.534352	0.0252051
96	0.65595	0.501995	0.545908	0.553901	0.495861	0.572805	0.550639	0.779778	0.562837	0.482925	0.447736	0.553839	0.589751	0.62292	0.672153	0.52954	0.503339	0.563971	0.559223	0.535816	0.404125	0.338135	0.588674	0.821378	0.237928		0.546845	0.0240933
97	0.690889	0.563806	0.581444	0.569562	0.494667	0.564694	0.554382	0.78092	0.571706	0.4766	0.474178	0.521076	0.584631	0.604024	0.675072	0.555862	0.511868	0.572251	0.578582	0.68757	0.468615	0.369819	0.712015	0.768292	0.244955		0.567099	0.0234768
98	0.672151	0.609503	0.617909	0.561429	0.54585	0.558257	0.544312	0.794129	0.557023	0.479689	0.528804	0.505019	0.596983	0.569301	0.6885	0.652285	0.566924	0.594301	0.675389	0.934943	0.534146	0.463469	0.762365	0.739407	0.278054		0.601206	0.0253601
99	0.701076	0.617332	0.657466	0.558116	0.62285	0.583237	0.551662	0.815768	0.534658	0.482908	0.572477	0.474924	0.597726	0.554711	0.70703	0.780087	0.715652	0.638925	0.862494	0.919555	0.624698	0.605065	0.848958	0.778757	0.327506		0.645346	0.0273532
100	0.754564	0.57987	0.696376	0.594562	0.726503	0.641068	0.552289	0.839113	0.524236	0.49598	0.596493	0.463164	0.552942	0.51901	0.687488	0.804055	0.843968	0.651192	0.893769	0.755138	0.702364	0.687523	0.914188	0.781873	0.360235		0.664719	0.0282646

## Sheet: Ezrin Mo
Normalised average intensity distribution : phalloidin -Ezrin Mo
Basal to apical position in RNE	section 1	section 2	section 3	section 4	section 5	section 6	section 7	section 8	section 9	section 10	section 11	section 12	section 13	section 14	section 15	section 16	section 17	section 18	section 19	section 20	section 21	section 22	section 23	section 24	section 25	section 26	section 27	section 28	section 29	section 30		Mean	SEM
1	0.721412	0.917539	0.778911	0.977401	0.746594	0.764931	1	0.664203	0.99121	0.861146	0.514737	0.521338	0.257463	0.793158	0.676762	0.66747	0.849675	0.992016	0.461271	0.91489	0.516616	0.701841	0.992408	0.560313	0.55112	1	0.992383	0.764066	0.859975	0.385344		0.74654	0.0374876
2	0.802604	0.962397	0.87816	1	0.841179	0.820336	0.985728	0.706124	1	0.71937	0.582474	0.56104	0.301406	0.845418	0.745057	0.739501	0.830597	1	0.524367	0.947239	0.595751	0.711303	1	0.577406	0.665507	0.919499	1	0.746857	0.76977	0.354607		0.771123	0.0347958
3	0.910612	0.999702	0.92273	0.976351	0.934787	0.953447	0.92017	0.781807	0.978502	0.623344	0.655923	0.614173	0.423922	0.920451	0.79115	0.774667	0.815397	0.994773	0.586344	0.966266	0.645259	0.743851	0.994131	0.569687	0.705837	0.857338	0.957735	0.727162	0.702979	0.353269		0.793392	0.0323255
4	0.948453	1	0.974921	0.945285	1	1	0.867397	0.828032	0.912856	0.557217	0.707347	0.652415	0.499834	0.982884	0.837278	0.828237	0.827391	0.977696	0.645773	0.981178	0.71499	0.762704	0.964874	0.545799	0.763425	0.787731	0.869522	0.722521	0.626827	0.361953		0.803151	0.0312592
5	0.990432	0.970741	0.996545	0.920715	0.958861	0.946824	0.82509	0.872387	0.860042	0.518154	0.714514	0.77243	0.637902	0.998826	0.875579	0.874391	0.846324	0.94964	0.765195	0.993113	0.722483	0.807559	0.947609	0.528259	0.822083	0.817774	0.823228	0.722448	0.568731	0.355768		0.813455	0.0294966
6	1	0.944644	1	0.856139	0.930377	0.876343	0.782831	0.892523	0.758066	0.462835	0.735228	0.835238	0.697805	1	0.912005	0.91401	0.893186	0.909974	0.82847	1	0.74237	0.833994	0.920313	0.534812	0.87107	0.842346	0.770555	0.735395	0.554255	0.35172		0.812883	0.0293949
7	0.982299	0.888903	0.996286	0.762645	0.896735	0.827711	0.739033	0.920508	0.717093	0.396627	0.79602	0.88903	0.800768	0.983652	0.930323	0.946322	0.918036	0.84491	0.886725	0.997449	0.795099	0.876664	0.910692	0.544553	0.918728	0.883328	0.754521	0.749777	0.542077	0.367422		0.815465	0.0298856
8	0.958378	0.867226	0.993936	0.742182	0.87745	0.777246	0.70031	0.979581	0.623889	0.3714	0.842344	0.926719	0.894497	0.957072	0.951769	0.972056	0.966896	0.797631	0.959843	0.987333	0.879443	0.906073	0.889706	0.515662	0.966706	0.909159	0.719721	0.786422	0.531431	0.4131		0.822173	0.03192
9	0.903205	0.834842	0.971953	0.707508	0.891399	0.754517	0.673717	1	0.583477	0.34365	0.899673	0.952432	0.959472	0.92431	0.978768	0.993389	0.992468	0.759792	0.993132	0.969186	0.948425	0.972538	0.84679	0.478648	1	0.921118	0.660894	0.808744	0.531245	0.499764		0.825169	0.0338049
10	0.871387	0.821208	0.944662	0.650339	0.868555	0.682027	0.657047	0.973543	0.553527	0.330766	0.962629	0.96838	0.991196	0.889238	1	1	1	0.722181	1	0.943904	0.977873	0.998109	0.802362	0.431648	0.988211	0.923031	0.615266	0.822674	0.548373	0.577609		0.817191	0.0352452
11	0.807711	0.807753	0.922757	0.572095	0.820609	0.640051	0.646737	0.929257	0.522991	0.320846	1	0.979664	1	0.878983	0.984094	0.997548	0.978377	0.681367	0.983809	0.909859	0.998764	1	0.723552	0.414273	0.977364	0.908446	0.5586	0.845152	0.586533	0.666146		0.802111	0.0359415
12	0.785033	0.779951	0.895894	0.545403	0.73078	0.597047	0.637112	0.828871	0.510307	0.323147	0.969139	0.99714	0.966282	0.865594	0.969055	0.980785	0.954762	0.628641	0.969495	0.857167	1	0.975145	0.646293	0.394195	0.978791	0.920397	0.527344	0.868124	0.646131	0.740917		0.782965	0.03569
13	0.75745	0.72851	0.86559	0.525129	0.661729	0.580762	0.628543	0.770465	0.461839	0.335508	0.835007	1	0.940102	0.814255	0.923084	0.963009	0.910544	0.548798	0.975019	0.767376	0.979701	0.95266	0.590162	0.378739	0.944851	0.956608	0.517761	0.894841	0.698569	0.794496		0.756704	0.0353873
14	0.74801	0.69358	0.844128	0.501726	0.622612	0.563616	0.619848	0.661771	0.43493	0.351144	0.761682	0.987555	0.900248	0.780313	0.879675	0.949443	0.861288	0.494591	0.97904	0.701476	0.967067	0.943212	0.518561	0.372412	0.918632	0.928231	0.505514	0.934478	0.728584	0.856335		0.733657	0.0358023
15	0.731597	0.658609	0.790717	0.470454	0.590452	0.528977	0.606839	0.611355	0.41248	0.383999	0.734589	0.972322	0.882668	0.75749	0.776302	0.947251	0.814619	0.450992	0.929757	0.645417	0.923435	0.872989	0.507804	0.347281	0.863298	0.915618	0.489757	0.963105	0.733497	0.885935		0.706654	0.0351677
16	0.721505	0.644348	0.758212	0.461101	0.555482	0.506814	0.591552	0.527801	0.380692	0.409485	0.692976	0.93206	0.8579	0.728647	0.705156	0.941978	0.716438	0.412528	0.885593	0.591876	0.84143	0.810225	0.52003	0.337574	0.819021	0.914127	0.458433	0.979465	0.767963	0.944638		0.680502	0.03495
17	0.702349	0.637514	0.760601	0.442847	0.522905	0.487085	0.578749	0.491974	0.366661	0.421821	0.631482	0.899245	0.835659	0.709029	0.697978	0.926195	0.672533	0.380814	0.841322	0.542613	0.764025	0.746537	0.533037	0.333062	0.777242	0.90938	0.452523	0.991726	0.803804	0.978604		0.66131	0.0350162
18	0.69956	0.62952	0.76394	0.431411	0.507304	0.489148	0.565539	0.423735	0.351229	0.458987	0.598159	0.832688	0.762321	0.68482	0.68768	0.903331	0.620735	0.349407	0.769694	0.491186	0.654056	0.710385	0.541641	0.322709	0.713295	0.906226	0.449517	1	0.809678	1		0.637597	0.034549
19	0.720326	0.612973	0.738915	0.425709	0.485703	0.498839	0.547499	0.402182	0.345293	0.485344	0.5749	0.801249	0.723097	0.672514	0.678896	0.879195	0.555351	0.313586	0.721126	0.437464	0.588423	0.64368	0.521505	0.314335	0.674963	0.876988	0.435374	0.991633	0.834636	0.98776		0.616315	0.0343815
20	0.726511	0.596772	0.712689	0.424139	0.470939	0.51153	0.524439	0.381244	0.33849	0.485063	0.531454	0.751884	0.641502	0.647661	0.645934	0.836279	0.516351	0.297983	0.684857	0.413242	0.553722	0.604959	0.507483	0.318879	0.670951	0.875921	0.423328	0.978833	0.841625	0.976669		0.596378	0.0338148
21	0.731023	0.588171	0.673593	0.413244	0.458773	0.519008	0.522855	0.376497	0.338028	0.47524	0.513431	0.745211	0.606367	0.65106	0.572178	0.79174	0.445421	0.283956	0.658415	0.391982	0.522873	0.572633	0.492915	0.330903	0.664379	0.871676	0.403151	0.947649	0.81372	0.954182		0.577676	0.0330055
22	0.729772	0.579668	0.646623	0.40553	0.459661	0.522698	0.522833	0.372994	0.334931	0.468087	0.488334	0.724371	0.569672	0.647591	0.523059	0.758791	0.419923	0.271226	0.62883	0.37415	0.487595	0.557743	0.488574	0.346688	0.642195	0.83517	0.389066	0.909736	0.797984	0.916843		0.560678	0.0315209
23	0.718249	0.578582	0.623692	0.408589	0.471607	0.521217	0.521623	0.370096	0.318134	0.466498	0.490155	0.708317	0.559129	0.662851	0.500916	0.722127	0.398286	0.261243	0.611766	0.358703	0.489708	0.548134	0.494023	0.34686	0.600868	0.830874	0.383001	0.86379	0.80278	0.87104		0.550095	0.0302969
24	0.709795	0.574628	0.60122	0.411104	0.480929	0.513919	0.522044	0.364244	0.309749	0.464284	0.50411	0.687506	0.546384	0.664461	0.46953	0.683823	0.365354	0.248033	0.594607	0.33089	0.499457	0.538268	0.500977	0.350886	0.58323	0.829647	0.364619	0.830194	0.807117	0.86125		0.540409	0.0300463
25	0.693369	0.571063	0.59796	0.41853	0.475322	0.515279	0.521761	0.35404	0.30263	0.451282	0.508088	0.682316	0.535147	0.665048	0.439808	0.643895	0.354976	0.24056	0.566117	0.319563	0.520273	0.539436	0.497014	0.344402	0.566477	0.822302	0.352557	0.797316	0.808666	0.847109		0.531744	0.0296368
26	0.688956	0.569045	0.59776	0.430188	0.462424	0.542949	0.515014	0.337104	0.302917	0.444357	0.520348	0.673022	0.530972	0.652347	0.41449	0.598678	0.343495	0.232773	0.533614	0.310383	0.513319	0.532646	0.489369	0.341255	0.553283	0.831015	0.339699	0.766776	0.810664	0.822402		0.523375	0.0293866
27	0.693766	0.56985	0.606712	0.431524	0.467774	0.558117	0.508116	0.329691	0.307072	0.437289	0.531416	0.656283	0.543154	0.621535	0.421652	0.574165	0.343345	0.226676	0.52036	0.303572	0.506965	0.522269	0.465799	0.340103	0.547561	0.844666	0.316219	0.732449	0.785386	0.819013		0.51775	0.0290655
28	0.696152	0.575786	0.615651	0.439478	0.458465	0.568394	0.506483	0.329036	0.309497	0.436886	0.544389	0.6498	0.549389	0.576929	0.426581	0.533501	0.346847	0.222615	0.506657	0.297494	0.488824	0.501639	0.447453	0.344578	0.521949	0.844628	0.30587	0.717932	0.772191	0.812005		0.51157	0.0287044
29	0.690676	0.572478	0.618981	0.446269	0.444763	0.561573	0.505563	0.333458	0.30869	0.424487	0.542046	0.627736	0.533476	0.562498	0.43474	0.490418	0.34814	0.21979	0.488158	0.287106	0.448203	0.486452	0.413227	0.349466	0.49203	0.830144	0.299726	0.6837	0.765837	0.795955		0.500193	0.0280455
30	0.68662	0.561796	0.611205	0.441189	0.423694	0.554026	0.492405	0.338284	0.30683	0.413873	0.556276	0.628317	0.524266	0.526882	0.445338	0.465043	0.351046	0.217062	0.484021	0.279536	0.42505	0.473478	0.399581	0.346928	0.477326	0.804267	0.30579	0.658391	0.74811	0.745406		0.489735	0.0267977
31	0.694408	0.555928	0.60225	0.429214	0.42226	0.521263	0.491371	0.352289	0.30509	0.411242	0.551474	0.629707	0.506169	0.524971	0.462845	0.438212	0.364584	0.214142	0.480999	0.274772	0.409591	0.461445	0.38965	0.343193	0.462094	0.783547	0.314273	0.632357	0.753169	0.723914		0.483548	0.0261188
32	0.69861	0.548247	0.591592	0.421532	0.453012	0.503998	0.494332	0.35909	0.303577	0.4187	0.560122	0.629206	0.500413	0.537458	0.484466	0.413817	0.36908	0.21206	0.468747	0.270637	0.391473	0.438254	0.373893	0.335376	0.446883	0.770369	0.32783	0.601038	0.750714	0.724728		0.479975	0.0258718
33	0.69509	0.545263	0.590006	0.419206	0.472466	0.500457	0.496108	0.368085	0.303297	0.420994	0.579343	0.642853	0.495424	0.527108	0.480142	0.39492	0.370787	0.210486	0.459355	0.26617	0.376397	0.429893	0.365822	0.334258	0.454848	0.763492	0.330941	0.580374	0.725729	0.723538		0.477428	0.0256277
34	0.687573	0.537633	0.59471	0.413997	0.483734	0.50085	0.494762	0.368218	0.303777	0.422799	0.613758	0.644572	0.485831	0.518551	0.463456	0.386786	0.374551	0.208223	0.45501	0.260279	0.373347	0.446556	0.35739	0.331878	0.464043	0.755318	0.335307	0.562156	0.703551	0.728538		0.475905	0.0254884
35	0.678339	0.536805	0.604727	0.408701	0.504642	0.505846	0.49305	0.373974	0.308769	0.42685	0.60499	0.654421	0.491131	0.526758	0.468729	0.372408	0.377441	0.20362	0.453444	0.251767	0.379813	0.441268	0.346224	0.33262	0.475312	0.738839	0.33661	0.553592	0.70111	0.721947		0.475791	0.0253446
36	0.671714	0.530045	0.602267	0.405511	0.506971	0.503048	0.494561	0.379319	0.312738	0.430225	0.585521	0.655594	0.497827	0.524129	0.484821	0.36126	0.378931	0.200702	0.449981	0.247925	0.393301	0.433402	0.333398	0.341653	0.478587	0.732557	0.335559	0.546983	0.71255	0.704471		0.474518	0.0250558
37	0.662673	0.525783	0.594461	0.404338	0.484671	0.497621	0.496352	0.376878	0.314082	0.439344	0.590277	0.666856	0.50541	0.524472	0.48424	0.353126	0.377116	0.198673	0.443475	0.24536	0.386048	0.429694	0.309521	0.336655	0.478637	0.740839	0.319626	0.538559	0.721921	0.693496		0.47134	0.0255211
38	0.643542	0.507426	0.572602	0.41393	0.471869	0.488916	0.491977	0.368396	0.312772	0.445137	0.599255	0.681101	0.510344	0.526105	0.482291	0.345703	0.374179	0.196774	0.437322	0.24362	0.360923	0.423207	0.296255	0.322877	0.484619	0.747534	0.31277	0.532768	0.725552	0.69912		0.467296	0.0260171
39	0.637831	0.49553	0.5503	0.42403	0.458269	0.48488	0.483106	0.355285	0.310167	0.441105	0.620053	0.668666	0.51254	0.545804	0.477046	0.338556	0.374087	0.194728	0.426428	0.243307	0.324237	0.413988	0.283122	0.320119	0.48953	0.760358	0.313472	0.522381	0.721031	0.701987		0.463065	0.0265157
40	0.628273	0.477218	0.533599	0.430085	0.440208	0.475389	0.47269	0.347751	0.315627	0.434343	0.593683	0.655462	0.51485	0.550527	0.47654	0.328538	0.375074	0.193179	0.419457	0.244546	0.300835	0.381585	0.261839	0.31645	0.485229	0.795409	0.317132	0.523519	0.724233	0.696702		0.456999	0.0270299
41	0.621129	0.464209	0.513283	0.430562	0.409075	0.467364	0.465082	0.342987	0.317505	0.420717	0.541603	0.637071	0.501861	0.561942	0.476858	0.326421	0.372566	0.192293	0.41196	0.247104	0.297081	0.362187	0.25277	0.313991	0.484647	0.790591	0.315287	0.520674	0.716674	0.677996		0.44845	0.0264232
42	0.61146	0.471149	0.501412	0.429269	0.388568	0.477363	0.458483	0.336117	0.318339	0.409176	0.540569	0.626692	0.468612	0.593857	0.481032	0.327199	0.367246	0.191264	0.403865	0.249228	0.286906	0.351677	0.243113	0.312428	0.467331	0.778695	0.31197	0.515003	0.723154	0.659028		0.44334	0.026381
43	0.60837	0.470744	0.491367	0.432559	0.398938	0.492314	0.45771	0.32557	0.323274	0.403412	0.538652	0.624323	0.457695	0.607825	0.495485	0.329592	0.365373	0.190731	0.387878	0.251673	0.273628	0.349445	0.243107	0.307425	0.45953	0.773783	0.311437	0.51492	0.740616	0.661038		0.442947	0.0267652
44	0.612652	0.471794	0.47497	0.43386	0.418045	0.50947	0.462425	0.314605	0.327002	0.406769	0.541265	0.613526	0.448821	0.621621	0.508364	0.336438	0.368624	0.190737	0.383499	0.255168	0.266442	0.33529	0.247702	0.309919	0.460084	0.768013	0.306872	0.518018	0.756057	0.657313		0.444179	0.0270011
45	0.620879	0.474809	0.462803	0.432236	0.425232	0.512047	0.469412	0.309751	0.338574	0.422805	0.545201	0.603047	0.442344	0.607384	0.513805	0.3392	0.373414	0.190897	0.387504	0.259482	0.265715	0.33472	0.256318	0.310418	0.4708	0.77112	0.301656	0.519115	0.786426	0.653009		0.446671	0.0271959
46	0.618966	0.473239	0.446276	0.424547	0.431066	0.494899	0.47262	0.300313	0.344517	0.43187	0.563976	0.599925	0.437296	0.568035	0.527621	0.34115	0.38161	0.191226	0.40345	0.265552	0.266494	0.349045	0.259848	0.312047	0.478184	0.751423	0.296129	0.515032	0.821182	0.664247		0.447726	0.027205
47	0.610903	0.474386	0.436907	0.422116	0.421974	0.475539	0.469834	0.299172	0.344184	0.432927	0.562166	0.596558	0.431465	0.543682	0.547127	0.34166	0.38648	0.190839	0.422384	0.274052	0.262298	0.354424	0.259149	0.315464	0.458945	0.733629	0.288423	0.512058	0.827006	0.670972		0.445557	0.0269209
48	0.597948	0.474896	0.436849	0.423335	0.407688	0.468474	0.47184	0.29756	0.341202	0.431781	0.563648	0.618736	0.412821	0.522266	0.566494	0.330764	0.39365	0.191322	0.433897	0.278256	0.263242	0.359327	0.258089	0.316957	0.442269	0.719413	0.289041	0.514036	0.832751	0.650853		0.443647	0.0267587
49	0.595299	0.474241	0.434765	0.426676	0.409643	0.47091	0.475141	0.299275	0.335229	0.443313	0.575267	0.634813	0.404572	0.501135	0.597398	0.320922	0.397095	0.19249	0.431367	0.281226	0.273456	0.365884	0.2596	0.316845	0.426597	0.671512	0.290511	0.522128	0.822049	0.658005		0.443579	0.0263682
50	0.595522	0.470531	0.441835	0.432233	0.412083	0.472493	0.472097	0.299685	0.329078	0.460838	0.572428	0.655494	0.403687	0.491876	0.638441	0.311758	0.396249	0.192613	0.429055	0.284349	0.278581	0.370666	0.251624	0.303771	0.423248	0.642435	0.285907	0.530675	0.814617	0.666431		0.444343	0.0267152
51	0.596942	0.45447	0.443344	0.456233	0.401013	0.472386	0.472675	0.297394	0.327157	0.465643	0.577914	0.655588	0.408845	0.485482	0.649641	0.3	0.393387	0.191621	0.445029	0.288206	0.279345	0.367538	0.242862	0.301291	0.421594	0.632842	0.288282	0.53297	0.832193	0.664786		0.444889	0.0271961
52	0.590665	0.450896	0.44019	0.471547	0.393171	0.47174	0.475294	0.291453	0.323855	0.465102	0.592888	0.647642	0.428409	0.487456	0.647095	0.28897	0.391329	0.186754	0.470007	0.293987	0.27446	0.36069	0.232725	0.295538	0.414061	0.6132	0.289608	0.534915	0.840018	0.689328		0.4451	0.0277295
53	0.587273	0.448076	0.429904	0.473031	0.390979	0.477166	0.471256	0.289396	0.31888	0.464549	0.605419	0.654618	0.43182	0.497948	0.639842	0.281563	0.386575	0.184873	0.515046	0.294994	0.262763	0.358427	0.234064	0.290751	0.402372	0.574505	0.288042	0.547228	0.855077	0.716224		0.445756	0.0284988
54	0.579673	0.445373	0.423871	0.479392	0.408731	0.479629	0.463967	0.290332	0.314613	0.476045	0.614091	0.679217	0.427187	0.488606	0.619549	0.277781	0.383389	0.18467	0.533901	0.294481	0.25784	0.359627	0.238983	0.285318	0.398962	0.568368	0.283509	0.55253	0.889449	0.702941		0.446734	0.029164
55	0.575457	0.443033	0.415632	0.483675	0.414855	0.47549	0.45746	0.293796	0.315066	0.470917	0.616235	0.690194	0.420538	0.488599	0.624972	0.280408	0.381342	0.185239	0.54772	0.292901	0.26026	0.359233	0.240053	0.278153	0.395765	0.561974	0.273592	0.548707	0.899645	0.68146		0.445746	0.0293335
56	0.569369	0.442998	0.408898	0.483884	0.422532	0.469467	0.451287	0.296845	0.316402	0.453099	0.613497	0.696728	0.413373	0.479731	0.643272	0.282484	0.37203	0.184611	0.541917	0.29392	0.271597	0.355848	0.242152	0.274063	0.385917	0.558035	0.271591	0.545901	0.907465	0.70343		0.445078	0.0297225
57	0.567029	0.446051	0.407247	0.480654	0.438638	0.46805	0.449809	0.296902	0.313594	0.436168	0.624589	0.70336	0.4011	0.479956	0.650902	0.282618	0.368915	0.18148	0.52172	0.297974	0.273036	0.351358	0.250366	0.274377	0.388913	0.550926	0.272563	0.547623	0.911578	0.705686		0.444773	0.0298796
58	0.574924	0.447681	0.406291	0.467472	0.458957	0.457563	0.454303	0.29464	0.311777	0.430419	0.605842	0.696838	0.387264	0.473378	0.642551	0.280249	0.365674	0.180149	0.500552	0.299659	0.271387	0.3387	0.258334	0.277195	0.392065	0.520676	0.275946	0.553781	0.933361	0.702509		0.442005	0.0299055
59	0.574044	0.450376	0.405845	0.463594	0.46034	0.455105	0.46454	0.292607	0.312103	0.420631	0.628794	0.695636	0.37874	0.468721	0.644064	0.274659	0.354582	0.179003	0.476372	0.30124	0.268757	0.337322	0.253601	0.284342	0.392242	0.504069	0.276089	0.560776	0.95758	0.679065		0.440495	0.0303572
60	0.565674	0.45645	0.407197	0.465138	0.461678	0.434001	0.475606	0.29241	0.317381	0.409906	0.635836	0.697549	0.386331	0.47373	0.626514	0.266692	0.350331	0.177087	0.434513	0.303761	0.271844	0.328568	0.240455	0.283869	0.383912	0.505212	0.273801	0.561325	0.960703	0.654262		0.436725	0.030284
61	0.565588	0.46311	0.405266	0.469948	0.460934	0.421124	0.485036	0.297825	0.323454	0.396793	0.64396	0.694731	0.388184	0.493495	0.62046	0.25931	0.345501	0.175764	0.420401	0.306823	0.2715	0.324788	0.238864	0.281818	0.387606	0.504094	0.274309	0.569485	0.960353	0.603009		0.435118	0.0300547
62	0.558012	0.460163	0.404663	0.470899	0.457565	0.41267	0.490759	0.301165	0.328006	0.378524	0.644889	0.697019	0.383752	0.499676	0.60879	0.25362	0.342346	0.175316	0.404967	0.310923	0.271844	0.324303	0.236155	0.286099	0.400187	0.508291	0.279353	0.577843	0.956443	0.550274		0.432484	0.0296798
63	0.554552	0.453805	0.405318	0.471654	0.464701	0.40793	0.48971	0.298787	0.327564	0.368837	0.629539	0.687851	0.380702	0.506552	0.605998	0.251418	0.34061	0.174822	0.387779	0.323246	0.270016	0.327345	0.234497	0.289401	0.411489	0.508124	0.285129	0.577385	0.9585	0.53533		0.430953	0.0294106
64	0.541362	0.456373	0.404518	0.467621	0.456484	0.405688	0.481446	0.300409	0.324219	0.36987	0.595816	0.685063	0.381435	0.505141	0.604601	0.256172	0.344392	0.17437	0.375396	0.334813	0.263939	0.327285	0.239031	0.284241	0.416351	0.499874	0.288828	0.575963	0.951463	0.525999		0.427939	0.0287645
65	0.527445	0.46831	0.397717	0.47257	0.460878	0.389419	0.475029	0.305544	0.317348	0.368802	0.568976	0.699217	0.379088	0.495929	0.595167	0.259871	0.347375	0.173727	0.370809	0.344797	0.26023	0.328753	0.24326	0.279488	0.419068	0.477765	0.290919	0.585113	0.923624	0.507316		0.424452	0.0279514
66	0.502273	0.477956	0.380639	0.48114	0.46762	0.377357	0.476517	0.309118	0.311345	0.364994	0.567645	0.700348	0.378077	0.494886	0.595665	0.264985	0.350964	0.173757	0.367486	0.354036	0.257195	0.328298	0.245582	0.276009	0.425281	0.465869	0.294035	0.575561	0.919353	0.479203		0.422106	0.0276674
67	0.488801	0.483908	0.365188	0.484088	0.45531	0.354456	0.476021	0.311078	0.302924	0.375391	0.555366	0.684429	0.38024	0.479216	0.58613	0.262909	0.35316	0.174448	0.36146	0.361874	0.25757	0.322956	0.245678	0.27213	0.43314	0.454209	0.295758	0.576026	0.917856	0.450424		0.417405	0.0272729
68	0.461303	0.48187	0.361432	0.484669	0.44932	0.349253	0.475523	0.31402	0.302305	0.383684	0.549114	0.682729	0.382376	0.475643	0.571457	0.263118	0.3566	0.174257	0.351846	0.369858	0.257645	0.317157	0.25322	0.269985	0.430754	0.447805	0.298571	0.574111	0.910156	0.432182		0.414399	0.0267798
69	0.44661	0.479104	0.355894	0.481247	0.44748	0.344148	0.482036	0.319693	0.301689	0.387484	0.551371	0.675782	0.399739	0.491284	0.571485	0.260432	0.365745	0.174188	0.334152	0.383753	0.262463	0.323699	0.25822	0.274873	0.429752	0.464271	0.297935	0.563887	0.904929	0.421595		0.415165	0.0264708
70	0.42879	0.474293	0.345295	0.479298	0.453624	0.340254	0.491693	0.322746	0.299679	0.389165	0.556419	0.666931	0.407025	0.515498	0.584954	0.256231	0.375487	0.173605	0.300282	0.394812	0.267918	0.323127	0.265307	0.280665	0.446096	0.482053	0.29796	0.559432	0.902681	0.412394		0.416457	0.0266434
71	0.42043	0.466863	0.336168	0.48017	0.468181	0.337458	0.496862	0.3319	0.298892	0.397399	0.560994	0.66947	0.413734	0.524962	0.588476	0.258842	0.39381	0.171754	0.285303	0.4069	0.266255	0.317397	0.271902	0.290434	0.438516	0.477354	0.297894	0.556314	0.906316	0.412752		0.418123	0.0268122
72	0.403368	0.456968	0.319705	0.490466	0.486438	0.334961	0.498659	0.336818	0.300995	0.411878	0.567708	0.673949	0.40914	0.549718	0.583394	0.261445	0.397414	0.17064	0.27916	0.423713	0.258439	0.313504	0.274969	0.289407	0.428349	0.480903	0.300464	0.551982	0.91163	0.405275		0.419049	0.0272533
73	0.395932	0.451554	0.311658	0.490912	0.496204	0.335726	0.499136	0.341365	0.3026	0.415373	0.577859	0.679724	0.399605	0.587249	0.599969	0.260281	0.402703	0.170808	0.27228	0.444603	0.247035	0.313731	0.270759	0.291642	0.426898	0.502123	0.302638	0.546877	0.916998	0.406123		0.422012	0.0280534
74	0.387835	0.441678	0.309463	0.495849	0.506871	0.331762	0.500828	0.342967	0.304337	0.417908	0.580446	0.678991	0.402958	0.608455	0.603061	0.253745	0.40127	0.17002	0.263824	0.472301	0.243505	0.315969	0.27166	0.309728	0.429404	0.52401	0.306336	0.542716	0.94037	0.402125		0.425346	0.0288809
75	0.381775	0.43565	0.311517	0.503717	0.49788	0.332487	0.507181	0.340976	0.30049	0.42507	0.561987	0.664849	0.419401	0.616865	0.608908	0.238263	0.397231	0.167593	0.254343	0.508336	0.243348	0.326751	0.273985	0.315878	0.429048	0.524417	0.310838	0.542825	0.982658	0.404363		0.427621	0.0298377
76	0.376802	0.425382	0.315123	0.519709	0.493331	0.33119	0.510868	0.346174	0.300555	0.447371	0.55606	0.656124	0.423259	0.630473	0.612167	0.221148	0.394721	0.167635	0.246615	0.529917	0.247844	0.331898	0.280678	0.327147	0.41719	0.518072	0.316527	0.551491	1	0.40177		0.429908	0.0303842
77	0.378231	0.419169	0.323085	0.538422	0.494669	0.329976	0.514069	0.350921	0.311499	0.456936	0.540997	0.650123	0.422598	0.650412	0.621159	0.213583	0.395185	0.16884	0.243897	0.549311	0.254723	0.327928	0.280015	0.335148	0.429078	0.521714	0.323599	0.554559	0.999176	0.406414		0.433515	0.0305385
78	0.382511	0.411206	0.324572	0.560644	0.527285	0.327383	0.516571	0.361824	0.317669	0.463919	0.518266	0.636877	0.413431	0.662828	0.643238	0.210076	0.396849	0.170677	0.241625	0.566306	0.252175	0.333417	0.272958	0.357459	0.457297	0.510516	0.337783	0.556898	0.993385	0.407769		0.437781	0.0306408
79	0.39436	0.405989	0.31642	0.575739	0.549783	0.329338	0.516542	0.368633	0.345359	0.474191	0.481627	0.627736	0.415378	0.660265	0.65311	0.209574	0.396212	0.172646	0.235221	0.583035	0.251156	0.346445	0.267964	0.36609	0.465465	0.490501	0.347182	0.564347	0.962424	0.406604		0.439311	0.0300094
80	0.402484	0.38501	0.306049	0.577936	0.554579	0.33225	0.516524	0.377835	0.360263	0.483233	0.458646	0.633119	0.420004	0.613353	0.663533	0.207264	0.395748	0.178635	0.228529	0.612092	0.258049	0.365869	0.264646	0.376836	0.476767	0.509866	0.358583	0.561945	0.945573	0.41433		0.441318	0.0295211
81	0.403474	0.37171	0.290517	0.5871	0.552706	0.332422	0.518949	0.382681	0.369934	0.497296	0.450398	0.638487	0.414455	0.590291	0.661809	0.200803	0.397167	0.182914	0.220615	0.626091	0.263527	0.380285	0.260704	0.377092	0.47899	0.515109	0.374125	0.574938	0.922461	0.418185		0.441841	0.0292724
82	0.399803	0.347061	0.279948	0.602716	0.561031	0.33313	0.522554	0.386994	0.366108	0.510446	0.446896	0.644885	0.404995	0.554885	0.645213	0.187715	0.397113	0.187297	0.218259	0.637859	0.264741	0.391932	0.259042	0.382923	0.475127	0.531221	0.381529	0.576537	0.875791	0.411233		0.439499	0.0286892
83	0.390986	0.337815	0.272211	0.617999	0.576569	0.33021	0.526549	0.389394	0.360592	0.528303	0.440663	0.642846	0.40817	0.543851	0.653495	0.17891	0.394249	0.19283	0.212444	0.644588	0.272983	0.392038	0.256615	0.399216	0.474057	0.551375	0.392823	0.584369	0.826961	0.407091		0.440007	0.0284463
84	0.384141	0.336621	0.272077	0.671497	0.579758	0.32946	0.531229	0.402485	0.351182	0.531196	0.413412	0.646394	0.41422	0.52767	0.66539	0.176617	0.392594	0.199975	0.201333	0.644968	0.270855	0.384316	0.252427	0.412287	0.467565	0.55954	0.406453	0.589109	0.800305	0.417599		0.441089	0.0287738
85	0.382764	0.339871	0.273773	0.722893	0.591936	0.331279	0.537556	0.414889	0.347265	0.545699	0.403502	0.651817	0.416741	0.518052	0.67095	0.171085	0.388481	0.210447	0.19675	0.643009	0.272774	0.394093	0.255825	0.442788	0.432964	0.565698	0.412818	0.599518	0.793286	0.418253		0.444893	0.0293728
86	0.389038	0.339885	0.286576	0.741365	0.609717	0.335473	0.540557	0.44114	0.321662	0.561844	0.39303	0.660907	0.438345	0.511261	0.675635	0.167604	0.386454	0.219731	0.193553	0.64561	0.269529	0.409639	0.274418	0.453089	0.395368	0.581226	0.417618	0.612248	0.765004	0.419706		0.448574	0.0295443
87	0.402311	0.342275	0.30459	0.750122	0.629427	0.340861	0.543082	0.456306	0.303938	0.603392	0.396484	0.668036	0.455555	0.484218	0.668131	0.160892	0.390597	0.228808	0.192264	0.646674	0.268525	0.432058	0.283416	0.462501	0.35354	0.597704	0.41832	0.628764	0.704212	0.421694		0.45129	0.0294337
88	0.415753	0.355098	0.317941	0.745333	0.652313	0.367598	0.545837	0.489538	0.294157	0.669358	0.391817	0.669374	0.485276	0.471501	0.63357	0.152364	0.395656	0.237931	0.192798	0.641338	0.269432	0.451313	0.28546	0.469118	0.315367	0.614158	0.429463	0.637238	0.670537	0.419673		0.45621	0.0295737
89	0.438254	0.381162	0.352596	0.740416	0.655125	0.387351	0.545422	0.511207	0.300797	0.779537	0.408431	0.660212	0.499781	0.456752	0.620454	0.141485	0.412932	0.247455	0.192762	0.62965	0.273306	0.466684	0.289109	0.475191	0.302013	0.628023	0.444421	0.648838	0.651867	0.430699		0.465731	0.030073
90	0.447445	0.413468	0.382971	0.73266	0.658322	0.446958	0.543764	0.550506	0.310699	0.831557	0.421074	0.643454	0.494615	0.454191	0.613971	0.135894	0.42206	0.260709	0.19273	0.608487	0.274827	0.457508	0.293725	0.485576	0.298434	0.629968	0.457101	0.652295	0.648068	0.448187		0.473707	0.0299788
91	0.464735	0.430236	0.411446	0.714145	0.670967	0.489043	0.544898	0.580373	0.330965	0.867185	0.424994	0.642203	0.483396	0.451775	0.62081	0.129049	0.448422	0.282449	0.202834	0.566974	0.273471	0.432425	0.302107	0.495415	0.296471	0.645396	0.47362	0.650962	0.657907	0.469435		0.481804	0.0299715
92	0.491881	0.437904	0.456161	0.681571	0.663765	0.58185	0.547402	0.593322	0.351882	0.853298	0.431395	0.644585	0.47352	0.462881	0.642053	0.12673	0.46477	0.299924	0.209213	0.536614	0.274377	0.408324	0.307512	0.523214	0.293544	0.681883	0.481004	0.65579	0.660793	0.477983		0.490505	0.0296587
93	0.601754	0.469954	0.483849	0.650676	0.647375	0.642427	0.547988	0.615908	0.378152	0.876607	0.447724	0.645212	0.469807	0.454105	0.647045	0.115558	0.483352	0.314694	0.216484	0.51224	0.272219	0.389223	0.313846	0.544538	0.302455	0.676592	0.482331	0.662676	0.69598	0.500024		0.502026	0.0302501
94	0.648344	0.496871	0.511027	0.588866	0.666611	0.726748	0.544809	0.663077	0.430655	0.945847	0.503315	0.645321	0.464111	0.446007	0.634968	0.113005	0.533891	0.326626	0.232533	0.490978	0.272961	0.395358	0.336828	0.602965	0.324788	0.663994	0.481519	0.686108	0.747142	0.505943		0.521041	0.0317618
95	0.64552	0.535722	0.529768	0.55568	0.664344	0.762944	0.536528	0.722242	0.461134	0.977858	0.575269	0.662345	0.448995	0.447622	0.620091	0.111767	0.565379	0.33831	0.239542	0.474656	0.279353	0.417225	0.351904	0.647942	0.362283	0.636743	0.480235	0.722709	0.821139	0.511659		0.536897	0.0331146
96	0.631866	0.561102	0.53712	0.53573	0.637748	0.757395	0.527524	0.735834	0.523641	1	0.673162	0.680988	0.443594	0.458423	0.602566	0.108578	0.637238	0.352296	0.24047	0.458852	0.281196	0.438018	0.38063	0.682762	0.391746	0.640915	0.488272	0.759411	0.88558	0.52054		0.55244	0.0342739
97	0.651005	0.614388	0.574194	0.498004	0.616101	0.772053	0.515671	0.75071	0.55838	0.96235	0.743838	0.719032	0.443839	0.465797	0.589085	0.109063	0.681449	0.361446	0.244276	0.449348	0.287677	0.488321	0.394406	0.736645	0.417278	0.646029	0.499354	0.761509	0.944637	0.550706		0.56822	0.0350918
98	0.679835	0.629526	0.691147	0.441683	0.593164	0.771729	0.502608	0.758183	0.594961	0.880157	0.738545	0.749858	0.444729	0.488472	0.587766	0.10323	0.730875	0.359239	0.265216	0.450629	0.286067	0.50567	0.413619	0.78575	0.424728	0.721798	0.509269	0.731692	0.982175	0.577922		0.580008	0.0355607
99	0.654505	0.607459	0.72977	0.399735	0.59189	0.75878	0.486204	0.774874	0.627502	0.845737	0.679079	0.830927	0.450013	0.552713	0.580699	0.107172	0.838257	0.354236	0.292152	0.456477	0.290795	0.55944	0.448187	0.904482	0.430514	0.901409	0.527286	0.710076	0.97841	0.612346		0.599371	0.0378039
100	0.610537	0.597019	0.702359	0.374267	0.609952	0.76057	0.466367	0.781756	0.639784	0.732786	0.579821	0.870568	0.448208	0.60128	0.586222	0.112344	0.894217	0.347665	0.316603	0.470953	0.315117	0.594629	0.46362	1	0.469373	0.978774	0.529381	0.675645	0.935645	0.599275		0.602158	0.0384012
