# Supplementary material for: Concerted action of neuroepithelial basal shrinkage and active epithelial migration ensures efficient optic cup morphogenesis
Source: eLife. 2017 Apr 4;6:e22689. doi: 10.7554/eLife.22689 (PMC5380436; doi:10.7554/eLife.22689)
Supplement: Figure 5—source data 2. — DOI: http://dx.doi.org/10.7554/eLife.22689.045 [file elife-22689-fig5-data2.xlsx]

## Sheet: Control
Normalised average intensity distribution : anti-phosphomyosin - Control
Basal to apical position in RNE	section 1	section 2	section 3	section 4	section 5	section 6	section 7	section 8	section 9	section 10	section 11	section 12	section 13	section 14	section 15	section 16	section 17	section 18	section 19	section 20	section 21	section 22	section 23	section 24	section 25		Mean	SEM
1	0.731994	0.634472	0.914342	0.746431	0.817048	0.770023	0.851185	0.965766	0.759609	0.771448	0.804118	0.905842	1	0.736291	0.755864	0.556503	0.726748	0.816762	0.732436	0.818998	0.581448	0.821867	0.934763	0.522998	0.395641		0.762904	0.0283146
2	0.724394	0.700461	0.934044	0.92037	0.863039	0.818167	0.895406	0.968526	0.815886	0.837107	0.862911	0.957906	0.911898	0.921551	0.775308	0.699549	0.832068	0.793155	0.771696	0.83823	0.705899	0.764453	0.963159	0.456174	0.376553		0.804316	0.0287385
3	0.723481	0.773585	0.909615	1	0.88372	0.827201	0.905164	0.963168	0.854858	0.847257	0.888893	0.947926	0.826841	0.953305	0.778783	0.805821	0.854345	0.760431	0.773371	0.859722	0.705852	0.710389	0.995545	0.427911	0.368673		0.813834	0.030204
4	0.734855	0.811169	0.906576	0.898213	0.906657	0.824653	0.936873	0.982091	0.90039	0.862698	0.861843	0.892234	0.745336	0.922218	0.799034	0.854468	0.889224	0.800955	0.758122	0.821072	0.712339	0.659042	0.98627	0.400259	0.392705		0.810372	0.0297737
5	0.761794	0.83522	0.908909	0.879703	0.931926	0.851327	0.942444	0.985672	0.93871	0.885369	0.866032	0.889079	0.724851	0.890384	0.789199	0.914643	0.899831	0.787861	0.8015	0.824549	0.720489	0.654289	0.985898	0.407475	0.470432		0.821904	0.0284354
6	0.794053	0.811789	0.9323	0.903728	0.954561	0.847883	0.933278	1	0.96721	0.912017	0.904134	0.91845	0.716804	0.889525	0.7913	0.952538	0.856366	0.811239	0.839015	0.820961	0.735957	0.703746	1	0.433443	0.519162		0.837978	0.0274424
7	0.804061	0.839007	0.953782	0.973828	0.977723	0.871118	0.943988	0.961058	0.969549	0.965111	0.91129	0.896668	0.699332	0.898963	0.809258	1	0.906891	0.824106	0.849327	0.830515	0.74453	0.709217	0.994723	0.414243	0.561373		0.852387	0.0282318
8	0.823157	0.874069	0.954914	0.95239	0.983073	0.886449	0.957536	0.967039	0.954381	0.983612	0.932125	0.88677	0.709007	0.909343	0.849829	0.959356	0.941461	0.850968	0.868178	0.84623	0.7291	0.697739	0.9615	0.422914	0.618364		0.86078	0.0268138
9	0.834408	0.880314	0.963366	0.945483	0.994402	0.871896	0.999011	0.952175	0.968618	0.989417	0.949531	0.91576	0.711713	0.959674	0.859611	0.953693	0.936806	0.828321	0.878319	0.871257	0.710675	0.740008	0.903429	0.428781	0.679012		0.869027	0.0260792
10	0.858842	0.877147	0.966285	0.915674	0.967108	0.897029	0.994862	0.962417	1	0.978757	0.946057	0.971845	0.717737	0.974897	0.878886	0.941908	0.953071	0.836736	0.865596	0.909656	0.74233	0.76253	0.885587	0.459675	0.753157		0.880711	0.0240482
11	0.855587	0.906915	1	0.933639	0.95546	0.884663	0.989695	0.959157	0.980269	0.957511	0.910294	0.993323	0.774904	0.959661	0.880745	0.948852	0.933677	0.850316	0.851827	0.945277	0.775524	0.798105	0.858908	0.524896	0.804964		0.889367	0.0204526
12	0.856092	0.937088	0.995421	0.983747	1	0.888671	0.988561	0.947599	0.948311	0.957543	0.913125	0.955179	0.767535	1	0.932465	0.96399	0.966535	0.878802	0.867678	0.969844	0.79891	0.832671	0.836471	0.553398	0.81483		0.902179	0.0199195
13	0.918268	1	0.975762	0.990124	0.953631	0.90025	1	0.95995	0.934317	0.941984	0.91315	1	0.753337	0.921956	0.928287	0.94911	0.990443	0.854529	0.91201	0.939293	0.843448	0.847854	0.807634	0.579467	0.762085		0.903076	0.0194462
14	0.985394	0.905301	0.925813	0.969755	0.966184	0.888448	0.984032	0.959072	0.948921	0.924162	0.913949	0.965794	0.756154	0.913643	0.928774	0.973567	1	0.919	0.909588	0.919184	0.859434	0.883498	0.808897	0.554609	0.704729		0.898716	0.0200399
15	0.969362	0.828078	0.92279	0.945491	0.960113	0.931268	0.967773	0.95601	0.957848	0.941966	0.905378	0.900187	0.785653	0.914238	0.920965	0.97522	0.982826	0.968213	0.89088	0.952284	0.875573	0.935454	0.801621	0.577869	0.736757		0.900153	0.018515
16	0.945919	0.81717	0.927125	0.906887	0.929544	0.955935	0.944911	0.922941	0.983809	1	0.880296	0.944542	0.76512	0.879719	0.942698	0.932032	0.965932	0.992234	1	1	0.902589	0.953115	0.800362	0.589461	0.744609		0.905078	0.0192654
17	0.932825	0.809361	0.899847	0.905248	0.896567	0.983056	0.90477	0.932488	0.994785	0.981091	0.967214	0.938725	0.730086	0.880867	0.931665	0.949878	0.947049	1	0.97017	0.985502	0.918015	0.994255	0.824	0.614421	0.747592		0.905579	0.0189319
18	0.923174	0.76528	0.832325	0.870382	0.871532	0.957325	0.865715	0.936482	0.970009	0.97297	0.981364	0.888337	0.695821	0.868695	0.940697	0.993428	0.92315	0.999743	0.916786	0.981959	0.94448	1	0.831517	0.707066	0.760322		0.895942	0.0178539
19	0.973889	0.736263	0.823	0.888805	0.854363	0.93274	0.850159	0.91971	0.969491	0.962929	0.975049	0.875395	0.663145	0.867397	0.897544	0.998554	0.901783	0.996519	0.908602	0.985769	0.954193	0.997604	0.817971	0.740793	0.818174		0.892394	0.0179257
20	1	0.705576	0.786972	0.861603	0.842908	0.935801	0.863917	0.89422	0.955978	0.972116	0.931602	0.911754	0.660434	0.854538	0.885222	0.989692	0.901027	0.96972	0.902753	0.987464	0.969657	0.986186	0.79972	0.746391	0.859126		0.886975	0.018303
21	0.981087	0.679433	0.76207	0.822418	0.819072	0.971631	0.857159	0.895563	0.919843	0.969673	0.938013	0.887049	0.626582	0.8266	0.899001	0.990928	0.891141	0.936739	0.903951	0.985669	1	0.982185	0.771382	0.775707	0.896794		0.879587	0.0198411
22	0.998291	0.670539	0.748438	0.789103	0.837435	0.949063	0.871876	0.885345	0.897802	0.941944	0.927753	0.876374	0.636633	0.82516	0.902038	0.9597	0.871666	0.943051	0.918442	0.954005	0.978591	0.971858	0.766746	0.814645	0.886436		0.872917	0.0187384
23	0.986305	0.667764	0.771589	0.755857	0.846964	0.970584	0.861128	0.874116	0.895445	0.946072	0.959005	0.864929	0.618514	0.819082	0.874821	0.949847	0.867827	0.938403	0.925752	0.959146	0.932257	0.940053	0.727265	0.808615	0.872205		0.865342	0.0192625
24	0.970344	0.661114	0.75698	0.74625	0.80341	0.970911	0.87084	0.876968	0.90388	0.928506	1	0.878938	0.617083	0.838698	0.93397	0.924777	0.912645	0.918042	0.85075	0.949258	0.924644	0.909802	0.69459	0.810854	0.889335		0.861703	0.0199297
25	0.913135	0.637382	0.747708	0.71819	0.763811	0.992713	0.866104	0.889915	0.8586	0.936859	0.983372	0.918484	0.61043	0.810741	1	0.898029	0.83845	0.905468	0.840267	0.894393	0.946243	0.841246	0.637974	0.819612	0.907756		0.847075	0.0217613
26	0.910343	0.647203	0.745741	0.721408	0.745634	1	0.84202	0.868627	0.860302	0.922609	0.962987	0.893363	0.611065	0.756381	0.991103	0.907431	0.847259	0.829793	0.844632	0.865181	0.982227	0.813327	0.622175	0.842027	0.90085		0.837348	0.0217991
27	0.952576	0.646071	0.792632	0.736814	0.754447	0.976787	0.836333	0.855376	0.8428	0.924429	0.869817	0.88114	0.605927	0.739955	0.937638	0.899488	0.818106	0.801431	0.858351	0.867358	0.949522	0.791647	0.587424	0.860927	0.890444		0.827098	0.0206979
28	0.944251	0.625509	0.771281	0.710579	0.752581	0.951595	0.804814	0.843659	0.833503	0.92755	0.880508	0.87467	0.575759	0.739703	0.855633	0.889027	0.83544	0.784906	0.819395	0.833158	0.950415	0.793519	0.565474	0.901193	0.882754		0.813875	0.0213904
29	0.906431	0.647712	0.752341	0.72031	0.738661	0.941072	0.787017	0.839565	0.811239	0.904725	0.857569	0.836052	0.586836	0.744312	0.8274	0.846743	0.845055	0.753389	0.806306	0.848625	0.914655	0.807109	0.517507	0.944574	0.893001		0.803128	0.0210013
30	0.87657	0.661173	0.739538	0.74794	0.735705	0.958759	0.793856	0.813136	0.776713	0.882438	0.850212	0.805983	0.571673	0.716122	0.816232	0.854173	0.830726	0.707328	0.777581	0.83517	0.838914	0.787078	0.501966	0.925085	0.849046		0.786125	0.0203441
31	0.850917	0.631314	0.742088	0.743811	0.73798	0.933243	0.787763	0.808883	0.772538	0.835591	0.845185	0.810128	0.572426	0.688139	0.800338	0.861469	0.86872	0.672031	0.790777	0.797089	0.805767	0.790904	0.470938	0.943643	0.859111		0.776832	0.021289
32	0.844201	0.667592	0.719261	0.762262	0.747393	0.894636	0.792332	0.822294	0.769037	0.831513	0.854957	0.769221	0.571391	0.675069	0.759393	0.856553	0.860871	0.695956	0.798006	0.806902	0.803144	0.79099	0.459844	0.898751	0.862526		0.772564	0.020148
33	0.822591	0.653373	0.720824	0.738513	0.771548	0.892512	0.801919	0.811883	0.749363	0.813785	0.81103	0.716676	0.565736	0.685655	0.765401	0.858481	0.845873	0.710459	0.762425	0.781275	0.803624	0.789813	0.457911	0.900954	0.89494		0.765062	0.0200698
34	0.785003	0.669497	0.714924	0.746609	0.747001	0.840645	0.779048	0.807111	0.751419	0.772938	0.777536	0.699858	0.560279	0.708087	0.754722	0.851923	0.813053	0.679741	0.745027	0.792348	0.805515	0.803588	0.464921	0.959347	0.905123		0.75741	0.0199044
35	0.751798	0.693847	0.757688	0.788049	0.712803	0.81973	0.767108	0.799587	0.737503	0.760907	0.750681	0.691755	0.55117	0.733302	0.743405	0.802801	0.823501	0.670998	0.740026	0.816542	0.802222	0.802442	0.484075	0.993507	0.91313		0.756343	0.0198846
36	0.734474	0.688226	0.763975	0.742811	0.708392	0.813672	0.786248	0.812575	0.727712	0.761422	0.726541	0.701102	0.567541	0.748569	0.706376	0.79424	0.798767	0.651271	0.751448	0.770589	0.725797	0.779375	0.491191	1	0.886651		0.745559	0.0190483
37	0.747231	0.678435	0.752552	0.746637	0.736874	0.777967	0.804865	0.812084	0.721117	0.766205	0.698297	0.723963	0.556482	0.746275	0.69834	0.798463	0.803166	0.640109	0.746358	0.760644	0.699888	0.772642	0.488951	0.888538	0.973326		0.741576	0.0188586
38	0.719961	0.673328	0.753599	0.75912	0.711913	0.745077	0.793232	0.811562	0.713898	0.75872	0.677641	0.715816	0.557123	0.722738	0.705291	0.775951	0.743543	0.630316	0.714468	0.76976	0.685465	0.72999	0.476317	0.778612	1		0.724938	0.0185074
39	0.702682	0.650191	0.75146	0.768944	0.68664	0.714793	0.785693	0.787632	0.716127	0.754785	0.659166	0.6698	0.557901	0.68894	0.695213	0.766816	0.732854	0.623943	0.716495	0.774848	0.673741	0.689276	0.439509	0.718958	0.966689		0.707724	0.0185895
40	0.686317	0.635288	0.785265	0.736738	0.693921	0.709396	0.799636	0.799155	0.705124	0.741599	0.664913	0.654351	0.554571	0.682725	0.672411	0.732164	0.716862	0.620738	0.727448	0.795303	0.647832	0.675191	0.436713	0.703524	0.881027		0.698329	0.0174627
41	0.673658	0.62784	0.783327	0.716274	0.694713	0.695637	0.791289	0.805183	0.703426	0.735516	0.676363	0.632344	0.556213	0.677377	0.670082	0.703382	0.697676	0.624702	0.69719	0.829853	0.643569	0.68484	0.434727	0.659064	0.828461		0.689708	0.0169762
42	0.690981	0.630377	0.770753	0.712677	0.726304	0.695787	0.803593	0.795319	0.696657	0.719482	0.681802	0.652505	0.550845	0.686567	0.656909	0.681857	0.705191	0.603097	0.712634	0.80436	0.618853	0.670443	0.431056	0.602621	0.789097		0.683591	0.0167909
43	0.657644	0.625644	0.779109	0.709256	0.718614	0.670594	0.809707	0.800561	0.684912	0.710673	0.688116	0.631888	0.545819	0.699303	0.638687	0.672228	0.747913	0.608423	0.695084	0.833093	0.575465	0.622982	0.429654	0.589207	0.768106		0.676507	0.0180976
44	0.640933	0.631783	0.785591	0.714376	0.703922	0.700365	0.804912	0.787751	0.702121	0.71099	0.667759	0.604716	0.564464	0.68903	0.646231	0.675561	0.758705	0.564944	0.673853	0.784158	0.53568	0.592177	0.416075	0.558746	0.762446		0.667092	0.0188012
45	0.629799	0.627135	0.76453	0.730719	0.715027	0.672394	0.803882	0.775924	0.669822	0.701013	0.65143	0.605351	0.576454	0.693156	0.650248	0.661861	0.72194	0.57195	0.666604	0.770525	0.535589	0.55318	0.400195	0.53661	0.780991		0.658653	0.0189874
46	0.62722	0.622369	0.79294	0.730636	0.741369	0.648822	0.82184	0.767243	0.683456	0.691917	0.633453	0.617843	0.557787	0.671129	0.641042	0.660679	0.711574	0.597997	0.667288	0.765316	0.520924	0.526111	0.390578	0.506272	0.759595		0.654216	0.0201988
47	0.62179	0.611205	0.805887	0.713197	0.748546	0.640861	0.803837	0.7682	0.6728	0.685187	0.624882	0.598799	0.553838	0.683295	0.642758	0.657294	0.668728	0.604414	0.670616	0.803828	0.499919	0.5159	0.379222	0.494777	0.690737		0.646421	0.0207877
48	0.646578	0.605892	0.79928	0.69333	0.72153	0.634694	0.804883	0.776594	0.676	0.676573	0.634781	0.584026	0.545606	0.713152	0.625857	0.644538	0.620867	0.635928	0.639134	0.820294	0.525244	0.487346	0.377939	0.500583	0.634247		0.640996	0.0208046
49	0.649937	0.60373	0.785863	0.687557	0.746768	0.617108	0.81985	0.756337	0.667834	0.681511	0.635354	0.592586	0.543617	0.705265	0.608562	0.641168	0.593237	0.635118	0.622456	0.8131	0.518505	0.458839	0.359488	0.506918	0.630021		0.635229	0.0215272
50	0.61538	0.582155	0.795248	0.669996	0.755397	0.632292	0.817755	0.78013	0.661237	0.684587	0.643007	0.578298	0.545655	0.705134	0.6148	0.654115	0.629556	0.607133	0.614772	0.800846	0.462933	0.45226	0.353214	0.528326	0.681018		0.63461	0.0225006
51	0.611391	0.574141	0.78547	0.682795	0.770354	0.637828	0.808243	0.772476	0.659585	0.682074	0.654023	0.584371	0.544638	0.698746	0.594376	0.629808	0.629481	0.636668	0.591833	0.780771	0.448448	0.436725	0.342096	0.535761	0.653529		0.629825	0.022681
52	0.598785	0.573414	0.771433	0.666712	0.769124	0.665556	0.796462	0.74578	0.662529	0.673741	0.673063	0.569214	0.535093	0.709617	0.61438	0.625108	0.624304	0.671505	0.585741	0.778307	0.457358	0.418862	0.341303	0.560547	0.571735		0.626387	0.0224621
53	0.595428	0.564992	0.774342	0.654147	0.736624	0.661424	0.772626	0.746265	0.66272	0.675744	0.667722	0.546557	0.542327	0.702424	0.601326	0.628328	0.613183	0.671142	0.587161	0.776636	0.474618	0.395417	0.347123	0.564374	0.518709		0.619254	0.0222363
54	0.613752	0.569093	0.773662	0.628673	0.728032	0.658073	0.7684	0.75063	0.66127	0.67546	0.637412	0.577129	0.544731	0.700961	0.608066	0.6663	0.597032	0.690523	0.572982	0.763752	0.465556	0.37734	0.34512	0.571473	0.513025		0.618338	0.0223738
55	0.612563	0.570106	0.75476	0.653357	0.730007	0.653577	0.747639	0.740585	0.658168	0.679596	0.605296	0.572964	0.557086	0.679503	0.640442	0.676711	0.598171	0.707643	0.55061	0.787192	0.453219	0.363849	0.342848	0.556176	0.517752		0.616393	0.0227237
56	0.623543	0.561964	0.763932	0.613907	0.709215	0.68098	0.737523	0.739498	0.667937	0.684723	0.601262	0.578508	0.553976	0.701002	0.677312	0.628086	0.588446	0.70186	0.532569	0.766445	0.500147	0.351079	0.342574	0.537552	0.539298		0.615334	0.0223583
57	0.629511	0.563661	0.759482	0.633555	0.71045	0.686361	0.724276	0.728642	0.671771	0.687769	0.615445	0.561706	0.561588	0.69855	0.635006	0.620393	0.589254	0.70138	0.543252	0.728673	0.499691	0.358833	0.345721	0.529954	0.508601		0.611741	0.0216278
58	0.626726	0.572591	0.777072	0.61545	0.682118	0.664208	0.712795	0.726867	0.685108	0.680082	0.614434	0.566824	0.550121	0.71024	0.647557	0.586192	0.569164	0.736911	0.52402	0.723633	0.466483	0.368405	0.344017	0.533573	0.469142		0.606149	0.0224773
59	0.611881	0.573132	0.75462	0.634	0.681361	0.650801	0.701267	0.72383	0.690082	0.694966	0.589888	0.572858	0.545546	0.733775	0.674697	0.59822	0.586128	0.759793	0.540884	0.72915	0.453205	0.378998	0.327695	0.570949	0.455038		0.60931	0.0229225
60	0.606152	0.583694	0.73946	0.628066	0.66561	0.643719	0.696224	0.724151	0.710904	0.710102	0.604549	0.574435	0.563284	0.732186	0.641136	0.588521	0.558522	0.744022	0.538544	0.711856	0.480212	0.381823	0.324576	0.622751	0.445796		0.608812	0.0222143
61	0.61369	0.590869	0.696705	0.64612	0.66301	0.641142	0.694587	0.732574	0.697871	0.704633	0.589282	0.577467	0.543713	0.739255	0.65962	0.560748	0.567191	0.737995	0.530066	0.709999	0.505247	0.379783	0.33249	0.649452	0.451753		0.608611	0.0216585
62	0.623321	0.580448	0.69202	0.635279	0.654724	0.664255	0.697458	0.726363	0.699503	0.707012	0.56352	0.562458	0.537993	0.733279	0.642693	0.568813	0.581673	0.731332	0.539882	0.716052	0.495177	0.36825	0.339529	0.673231	0.449875		0.607366	0.0218127
63	0.607103	0.576908	0.689298	0.630507	0.656474	0.648287	0.679827	0.725708	0.69891	0.71301	0.577193	0.577854	0.544881	0.70613	0.645575	0.54957	0.553147	0.712828	0.557937	0.682465	0.490828	0.350997	0.355576	0.674829	0.461448		0.602692	0.0208744
64	0.609716	0.573565	0.670442	0.642004	0.664942	0.636567	0.664721	0.733694	0.703494	0.722711	0.556319	0.574952	0.546203	0.699	0.641827	0.533713	0.527568	0.690385	0.554772	0.638812	0.479879	0.327389	0.355188	0.69843	0.438003		0.595372	0.0217303
65	0.606187	0.588061	0.682104	0.658452	0.67211	0.619455	0.672814	0.731996	0.709567	0.735631	0.569282	0.561531	0.547289	0.699472	0.641777	0.520958	0.536228	0.689778	0.546567	0.642142	0.469092	0.332297	0.351215	0.670198	0.434754		0.595558	0.0220351
66	0.621355	0.58396	0.70285	0.643895	0.664316	0.589477	0.670783	0.739705	0.699374	0.736163	0.592382	0.577358	0.541058	0.695433	0.660795	0.522241	0.550068	0.676797	0.570341	0.631121	0.457411	0.339987	0.353913	0.642602	0.439834		0.596129	0.021569
67	0.651414	0.57166	0.742177	0.650805	0.663583	0.572249	0.665887	0.723498	0.700169	0.727166	0.592699	0.601321	0.532526	0.72031	0.680981	0.540798	0.544722	0.639262	0.563098	0.632715	0.46433	0.368855	0.36127	0.620599	0.424575		0.598267	0.0213298
68	0.655124	0.549036	0.706093	0.64715	0.696587	0.586817	0.680736	0.739683	0.717025	0.721626	0.574242	0.598336	0.53425	0.728519	0.675536	0.527573	0.552229	0.666396	0.532428	0.653179	0.475141	0.387074	0.364131	0.605704	0.399267		0.598955	0.0218532
69	0.648641	0.54804	0.690106	0.654248	0.719086	0.575609	0.70535	0.73555	0.709711	0.708707	0.586967	0.592668	0.552724	0.725996	0.660981	0.521174	0.570259	0.640162	0.537151	0.646392	0.471316	0.407715	0.385129	0.595944	0.385819		0.599018	0.0210818
70	0.637818	0.557299	0.6942	0.66309	0.777101	0.564851	0.699216	0.757281	0.705455	0.708311	0.57624	0.60023	0.539349	0.724925	0.708786	0.522266	0.582237	0.656964	0.540827	0.674211	0.46845	0.402644	0.399599	0.585263	0.410658		0.606291	0.0219062
71	0.611967	0.582201	0.703581	0.682198	0.776104	0.584748	0.696144	0.741613	0.705457	0.701102	0.581836	0.608957	0.535567	0.742979	0.656652	0.522979	0.584412	0.657543	0.558608	0.673722	0.467561	0.402095	0.418957	0.589858	0.451753		0.609544	0.0205737
72	0.619831	0.56558	0.737382	0.667926	0.801257	0.57763	0.689579	0.74517	0.708199	0.678415	0.558285	0.612387	0.529935	0.716463	0.688689	0.526574	0.604697	0.665471	0.587476	0.665741	0.471658	0.38704	0.416709	0.639422	0.509498		0.614841	0.0206193
73	0.642054	0.580944	0.724161	0.651968	0.811995	0.557926	0.680556	0.736971	0.708714	0.675036	0.575908	0.606444	0.538047	0.718849	0.712057	0.534905	0.628124	0.657918	0.600259	0.675026	0.479043	0.384709	0.406482	0.640821	0.55965		0.619543	0.0202892
74	0.662134	0.589019	0.712048	0.67205	0.794234	0.586236	0.709103	0.722414	0.707915	0.67954	0.559253	0.580299	0.539439	0.725992	0.721045	0.552631	0.64978	0.658758	0.607039	0.678106	0.488238	0.386757	0.409135	0.65137	0.574921		0.624698	0.0198948
75	0.662313	0.576931	0.693326	0.658941	0.761578	0.605916	0.716408	0.733998	0.712104	0.682515	0.573244	0.606321	0.540003	0.771206	0.773808	0.561473	0.633563	0.678393	0.597593	0.686015	0.467675	0.396139	0.435573	0.666748	0.559181		0.630039	0.0201383
76	0.648151	0.597533	0.677567	0.654417	0.728755	0.586473	0.709729	0.74849	0.730951	0.677198	0.565843	0.60736	0.551501	0.769932	0.774244	0.576598	0.64044	0.675251	0.606022	0.683065	0.4625	0.400871	0.453529	0.673155	0.555614		0.630208	0.0194669
77	0.638264	0.592733	0.69198	0.647644	0.725836	0.600327	0.718381	0.741132	0.728812	0.671782	0.573391	0.621135	0.564075	0.737724	0.821096	0.6034	0.659779	0.62556	0.589767	0.690532	0.459478	0.430361	0.485808	0.695046	0.56548		0.635181	0.018594
78	0.621178	0.59005	0.691343	0.664276	0.691523	0.619038	0.709823	0.738324	0.698514	0.688369	0.582895	0.650768	0.557896	0.719746	0.805541	0.610045	0.663593	0.666376	0.631619	0.70013	0.459886	0.460844	0.507725	0.700318	0.52674		0.638262	0.0172055
79	0.631416	0.595858	0.669856	0.653732	0.652015	0.624008	0.711573	0.737491	0.701317	0.684245	0.589755	0.634578	0.567781	0.727011	0.805222	0.606513	0.690299	0.663125	0.646659	0.707668	0.438663	0.467044	0.555705	0.720062	0.507866		0.639579	0.0171618
80	0.65387	0.585174	0.68454	0.67173	0.675772	0.622384	0.732806	0.739246	0.696933	0.677088	0.581091	0.66629	0.58271	0.735349	0.790583	0.62787	0.697208	0.686068	0.647722	0.708793	0.404851	0.457241	0.573187	0.704654	0.490569		0.643749	0.0182447
81	0.663895	0.601273	0.683565	0.680011	0.666849	0.626887	0.73594	0.741657	0.701227	0.680057	0.570218	0.658768	0.590403	0.720274	0.79138	0.63301	0.710682	0.655857	0.646454	0.686411	0.439547	0.465863	0.580597	0.736	0.476033		0.645714	0.0175692
82	0.677076	0.59624	0.699661	0.657375	0.638336	0.642344	0.734875	0.734225	0.685271	0.68046	0.579646	0.628979	0.570431	0.713844	0.788426	0.657559	0.689151	0.664767	0.681005	0.731975	0.491085	0.460878	0.57642	0.810813	0.467581		0.650337	0.0179271
83	0.680364	0.604998	0.702111	0.668908	0.683289	0.661516	0.747144	0.732086	0.693381	0.676541	0.567359	0.642468	0.590889	0.712731	0.795229	0.662532	0.721151	0.690673	0.687688	0.754057	0.512123	0.46485	0.574785	0.863888	0.47224		0.66252	0.0188382
84	0.706761	0.59354	0.704544	0.683105	0.688742	0.659621	0.746211	0.732132	0.707917	0.710707	0.56516	0.632949	0.580938	0.710428	0.812206	0.663279	0.715709	0.692684	0.71197	0.756313	0.524773	0.467435	0.586839	0.90299	0.49356		0.670021	0.0195897
85	0.72984	0.585216	0.699863	0.705994	0.683981	0.664794	0.751552	0.741608	0.708061	0.721206	0.559446	0.637058	0.563125	0.696626	0.812194	0.667592	0.736679	0.694463	0.728001	0.76078	0.526123	0.480519	0.621321	0.911859	0.493822		0.675269	0.0199648
86	0.732757	0.593959	0.690596	0.714431	0.666894	0.681078	0.754479	0.749223	0.700485	0.729029	0.582397	0.651494	0.597753	0.691345	0.801747	0.668984	0.765972	0.707287	0.736661	0.762561	0.515725	0.502864	0.636727	0.895178	0.522518		0.682086	0.0185467
87	0.75344	0.589238	0.672609	0.70155	0.69085	0.700073	0.756917	0.745956	0.700038	0.737915	0.565297	0.623125	0.606467	0.70416	0.861429	0.680135	0.751377	0.749072	0.728345	0.800761	0.528504	0.522084	0.652521	0.908348	0.519217		0.689977	0.0197875
88	0.772944	0.601364	0.680833	0.709132	0.699194	0.694641	0.745561	0.75576	0.709932	0.748274	0.574049	0.64146	0.627857	0.712476	0.847724	0.682033	0.749549	0.7724	0.724837	0.819377	0.5283	0.536734	0.667661	0.924026	0.491701		0.696713	0.0201243
89	0.789223	0.605304	0.676578	0.718235	0.739677	0.723809	0.741766	0.782613	0.703072	0.751123	0.586241	0.64622	0.614833	0.696371	0.818518	0.713472	0.742689	0.788861	0.740533	0.832686	0.541815	0.542218	0.708724	0.890685	0.46743		0.702508	0.019905
90	0.799405	0.621904	0.669942	0.695627	0.767458	0.751347	0.771059	0.793064	0.689491	0.768253	0.588055	0.654076	0.612952	0.696695	0.791051	0.758162	0.758349	0.800691	0.740465	0.813014	0.544652	0.53144	0.731128	0.853177	0.525099		0.709062	0.0187056
91	0.824291	0.615673	0.675635	0.686177	0.792209	0.762072	0.763298	0.770234	0.6846	0.773773	0.593041	0.647162	0.591506	0.685877	0.812301	0.798708	0.787323	0.824501	0.767787	0.81098	0.566873	0.545606	0.75876	0.802621	0.630462		0.718859	0.0178139
92	0.834631	0.618777	0.67329	0.70656	0.809991	0.780781	0.738272	0.783458	0.686064	0.778934	0.592886	0.631065	0.616684	0.670206	0.827011	0.784555	0.790619	0.797415	0.773761	0.833551	0.581234	0.557783	0.756614	0.763102	0.694172		0.723257	0.017093
93	0.850641	0.628117	0.67612	0.721602	0.790619	0.773733	0.727146	0.812872	0.687688	0.781198	0.61045	0.612401	0.621832	0.679262	0.923389	0.789156	0.779164	0.789891	0.757992	0.831327	0.568508	0.588498	0.748365	0.750823	0.686578		0.727495	0.0179692
94	0.841971	0.640805	0.681688	0.721511	0.815117	0.76594	0.718701	0.825248	0.673165	0.767253	0.627034	0.640801	0.591629	0.691472	0.869576	0.758839	0.778861	0.812518	0.752391	0.807309	0.544813	0.610706	0.749591	0.760573	0.645336		0.723714	0.0171491
95	0.851643	0.62707	0.695368	0.717888	0.805123	0.764438	0.723055	0.841014	0.687935	0.775633	0.639408	0.645536	0.589345	0.703395	0.773335	0.7351	0.771393	0.80808	0.744892	0.823649	0.524921	0.615583	0.736601	0.749714	0.586097		0.717449	0.01716
96	0.860723	0.645905	0.705985	0.733848	0.786593	0.761367	0.698193	0.85267	0.682854	0.766904	0.660154	0.644376	0.591387	0.691254	0.793579	0.742951	0.761629	0.821736	0.717615	0.8064	0.524897	0.636581	0.734905	0.657991	0.523328		0.712153	0.0178829
97	0.901123	0.648451	0.708837	0.741549	0.799837	0.737322	0.695871	0.849125	0.677575	0.748358	0.663388	0.630688	0.608215	0.708288	0.807629	0.769604	0.748984	0.783565	0.724777	0.818788	0.556342	0.688404	0.772273	0.599384	0.529015		0.716696	0.0180245
98	0.873712	0.663641	0.732012	0.733733	0.743981	0.724078	0.70477	0.863815	0.662566	0.733817	0.676732	0.618739	0.604818	0.729813	0.910553	0.791384	0.748626	0.763114	0.73388	0.822805	0.571891	0.810407	0.772894	0.519411	0.548517		0.722388	0.0197853
99	0.879974	0.655295	0.703284	0.73549	0.770296	0.715956	0.702248	0.850001	0.65689	0.736348	0.69127	0.612696	0.634337	0.73624	0.914672	0.782627	0.752078	0.74429	0.736569	0.85403	0.587987	0.826122	0.772812	0.506847	0.617621		0.727039	0.019239
100	0.863334	0.656202	0.665853	0.760704	0.82438	0.722982	0.703755	0.859947	0.624588	0.721548	0.676976	0.590695	0.601122	0.710613	0.835451	0.79628	0.760431	0.755973	0.744664	0.850422	0.595282	0.802287	0.795281	0.526642	0.59974		0.721806	0.0192054

## Sheet: ezrin Mo
Figure 5- source data 2
Normalised average intensity distribution : anti-phosphomyosin - Ezrin Mo
Basal to apical position in RNE	section 1	section 2	section 3	section 4	section 5	section 6	section 7	section 8	section 9	section 10	section 11	section 12	section 13	section 14	section 15	section 16	section 17	section 18	section 19	section 20	section 21	section 22	section 23	section 24	section 25	section 26	section 27	section 28	section 29	section 30		Mean	SEM
1	0.517456	0.709182	0.59473	0.696377	0.479295	0.481322	0.774533	0.627992	0.982135	0.899089	0.45333	0.416802	0.192827	0.669767	0.531276	0.439898	0.738267	1	0.367174	0.746214	0.484952	0.636107	0.98969	0.753464	0.550312	0.956256	1	0.61273	0.631871	0.269933		0.640099	0.0397614
2	0.604037	0.75082	0.692255	0.648802	0.530315	0.514283	0.835116	0.663949	0.981125	0.70739	0.504234	0.425248	0.205017	0.73597	0.588851	0.505926	0.777863	0.988219	0.382565	0.775155	0.526131	0.633699	0.999508	0.725266	0.659516	0.800394	0.952865	0.60253	0.631739	0.270953		0.653991	0.0358388
3	0.757681	0.790808	0.745949	0.615336	0.604431	0.616994	0.851699	0.714757	1	0.610573	0.520732	0.421705	0.260818	0.822412	0.629415	0.535435	0.837594	0.963586	0.391688	0.799536	0.538287	0.690642	1	0.68897	0.66047	0.709724	0.84639	0.587643	0.565756	0.277645		0.668556	0.0342373
4	0.814386	0.805657	0.811136	0.592098	0.719835	0.682374	0.85914	0.725043	0.985334	0.555928	0.517919	0.417771	0.302059	0.863889	0.64424	0.575507	0.921899	0.926559	0.405909	0.825102	0.560702	0.715153	0.965756	0.666813	0.688163	0.615269	0.718336	0.583043	0.476207	0.268465		0.673656	0.0343175
5	0.877076	0.803136	0.802885	0.600384	0.741399	0.753662	0.876278	0.747335	0.947263	0.520941	0.53028	0.427768	0.365059	0.918888	0.664528	0.622568	0.961833	0.878959	0.442453	0.848494	0.61259	0.782653	0.933362	0.68274	0.797451	0.602264	0.664204	0.591795	0.433484	0.254209		0.689531	0.0342503
6	0.897432	0.817774	0.79598	0.605805	0.722052	0.775777	0.904037	0.772728	0.846758	0.504547	0.565361	0.444033	0.406856	0.946876	0.723501	0.675486	1	0.82678	0.470832	0.880179	0.660585	0.799326	0.909841	0.685049	0.866039	0.623945	0.646787	0.594321	0.446927	0.23605		0.701722	0.0337127
7	0.950122	0.869119	0.81258	0.621226	0.733834	0.790327	0.928948	0.805667	0.81591	0.463642	0.639236	0.459541	0.481359	0.930554	0.739872	0.702312	0.997074	0.747798	0.524963	0.931967	0.697134	0.795773	0.903163	0.701388	0.871476	0.668124	0.662073	0.599278	0.418456	0.238763		0.716723	0.0333453
8	0.957622	0.866489	0.855456	0.673083	0.767963	0.834189	0.937785	0.864885	0.768415	0.436959	0.722701	0.469391	0.565512	0.936891	0.729035	0.723094	0.991087	0.687872	0.654716	0.956929	0.780994	0.830299	0.911019	0.732679	0.839106	0.671556	0.650624	0.602989	0.379867	0.250643		0.734995	0.0330488
9	0.895563	0.834447	0.880435	0.72373	0.872308	0.857817	0.946803	0.900796	0.741602	0.387951	0.832897	0.506699	0.672276	0.935916	0.736116	0.759537	0.975	0.64618	0.707861	0.979694	0.879842	0.899645	0.928952	0.740104	0.86481	0.659657	0.59131	0.606375	0.370173	0.279657		0.753805	0.0337623
10	0.856713	0.826545	0.853131	0.737541	0.937229	0.845926	0.970194	0.967604	0.725554	0.359983	0.872534	0.526343	0.758039	0.879878	0.721718	0.788964	0.941113	0.613104	0.712765	0.997492	0.931193	0.944273	0.95219	0.740873	0.882614	0.615765	0.547586	0.618469	0.378499	0.310504		0.760478	0.0348449
11	0.808228	0.824935	0.847545	0.76614	0.962692	0.846792	0.990673	1	0.716698	0.377773	0.902378	0.541408	0.83073	0.911464	0.735742	0.804587	0.844678	0.585087	0.719355	1	0.997943	1	0.941793	0.679816	0.948949	0.581619	0.514952	0.638241	0.391505	0.327263		0.767966	0.0361108
12	0.796468	0.819441	0.892252	0.860722	1	0.884541	1	0.977937	0.688064	0.414076	1	0.589352	0.922911	0.940024	0.720349	0.839232	0.792326	0.552274	0.756034	0.993399	1	0.981346	0.893374	0.646056	1	0.600564	0.508611	0.640885	0.400973	0.345826		0.781901	0.0366965
13	0.834137	0.789535	0.979255	0.917126	0.9889	0.90251	0.995632	0.944662	0.642366	0.447645	0.990139	0.598089	0.961919	0.912067	0.625001	0.857981	0.698385	0.504605	0.782793	0.96807	0.957251	0.947398	0.859904	0.645408	0.961297	0.647321	0.509197	0.647837	0.416296	0.400947		0.777789	0.0355578
14	0.857657	0.767965	1	0.955699	0.949638	0.917846	0.978176	0.871407	0.633093	0.456948	0.895969	0.620192	0.965553	0.869461	0.580218	0.870003	0.623211	0.472147	0.815301	0.934229	0.953326	0.949942	0.842614	0.62323	0.920131	0.625273	0.521341	0.654901	0.44933	0.431629		0.766881	0.0342357
15	0.902094	0.721908	0.9395	0.980417	0.895358	0.939284	0.945989	0.843755	0.617941	0.450557	0.878507	0.640072	0.973603	0.84041	0.556571	0.872053	0.576563	0.446094	0.823704	0.899718	0.930142	0.927887	0.8507	0.551584	0.887714	0.618765	0.507166	0.68632	0.470066	0.463235		0.754589	0.0336708
16	0.901543	0.708475	0.853765	0.980561	0.884108	0.926144	0.905983	0.808304	0.576845	0.419722	0.854217	0.630451	0.996035	0.833332	0.56454	0.859183	0.495176	0.423665	0.782872	0.865394	0.853994	0.871586	0.892016	0.53047	0.837105	0.581017	0.482118	0.700884	0.495501	0.519415		0.734481	0.0329434
17	0.866446	0.69577	0.84313	0.978673	0.882468	0.909837	0.874161	0.788423	0.568736	0.408983	0.810957	0.626869	1	0.817532	0.549585	0.847495	0.472876	0.405564	0.767737	0.830709	0.80084	0.788573	0.904672	0.510412	0.785619	0.541628	0.47586	0.719656	0.50999	0.543134		0.717545	0.0321532
18	0.873186	0.676941	0.869698	1	0.865457	0.912415	0.846675	0.710767	0.564431	0.414963	0.784871	0.613302	0.985041	0.822005	0.560161	0.830467	0.456967	0.392615	0.779949	0.78158	0.691562	0.745875	0.915921	0.506474	0.712444	0.559259	0.475881	0.743826	0.528345	0.546765		0.705595	0.0315768
19	0.918754	0.683878	0.894688	0.996652	0.7799	0.921559	0.817354	0.672579	0.574765	0.430559	0.742214	0.611751	0.934375	0.812887	0.575537	0.826708	0.437921	0.387177	0.796966	0.729889	0.609928	0.660697	0.948174	0.526137	0.698417	0.608964	0.479718	0.757456	0.561965	0.54776		0.698178	0.0307315
20	0.924415	0.702476	0.888722	0.977235	0.728482	0.921972	0.754908	0.624925	0.555938	0.466295	0.709414	0.557225	0.829454	0.802776	0.524539	0.836658	0.426789	0.391648	0.842202	0.713577	0.574357	0.611991	0.951207	0.56696	0.665166	0.590717	0.476289	0.746307	0.574759	0.548798		0.682873	0.0300147
21	0.919175	0.70109	0.866086	0.957601	0.711304	0.935163	0.711814	0.607137	0.53154	0.479857	0.683069	0.554277	0.783125	0.807643	0.442754	0.841757	0.39841	0.395323	0.883401	0.698959	0.53343	0.597578	0.956415	0.584031	0.636654	0.567557	0.466398	0.720578	0.571628	0.511299		0.668502	0.0311288
22	0.930948	0.71269	0.849063	0.954352	0.697366	0.933834	0.679175	0.577303	0.513699	0.506621	0.650534	0.556689	0.72617	0.826156	0.401094	0.841511	0.391004	0.397641	0.949317	0.680245	0.503128	0.59277	0.955451	0.575007	0.601092	0.553187	0.449306	0.715174	0.574622	0.488733		0.659463	0.0324781
23	0.935006	0.708167	0.841843	0.936771	0.678493	0.883058	0.641895	0.552031	0.474448	0.548997	0.688168	0.551495	0.709851	0.825347	0.390186	0.843495	0.387396	0.398477	0.977372	0.661339	0.483596	0.572334	0.937295	0.55362	0.528064	0.549857	0.443503	0.723394	0.573745	0.46423		0.648782	0.0328385
24	0.914525	0.693456	0.855539	0.904824	0.669939	0.837593	0.610051	0.516938	0.44992	0.577254	0.705838	0.566789	0.665637	0.813591	0.388343	0.856101	0.379121	0.394934	0.997444	0.619547	0.481991	0.562566	0.898685	0.498284	0.505381	0.545327	0.428043	0.723696	0.585816	0.460951		0.636938	0.0326839
25	0.898114	0.685778	0.863942	0.831331	0.668063	0.827011	0.584644	0.485103	0.425786	0.596043	0.729589	0.589018	0.657264	0.785265	0.378377	0.897053	0.376505	0.394516	1	0.602997	0.51776	0.577166	0.871548	0.485827	0.494406	0.557424	0.417492	0.745475	0.627847	0.470034		0.634713	0.0322783
26	0.897367	0.708101	0.869235	0.80354	0.68059	0.838385	0.560223	0.446642	0.409741	0.60317	0.735342	0.598999	0.655936	0.784924	0.38352	0.94872	0.379045	0.394459	0.975068	0.5967	0.505897	0.575173	0.832251	0.480783	0.504268	0.562794	0.407305	0.740193	0.620207	0.486814		0.632846	0.0325248
27	0.885193	0.713086	0.869879	0.79562	0.706648	0.834224	0.535782	0.414186	0.395233	0.574917	0.712098	0.576333	0.669546	0.776644	0.386216	0.975317	0.38194	0.395048	0.958818	0.595735	0.506548	0.54876	0.788501	0.482903	0.490369	0.573849	0.388373	0.711189	0.581259	0.499356		0.624119	0.0326987
28	0.892785	0.744537	0.872206	0.762131	0.710837	0.806623	0.51118	0.397775	0.392112	0.539895	0.68086	0.568326	0.663796	0.751765	0.396721	1	0.393683	0.395117	0.928279	0.597115	0.495009	0.528057	0.802296	0.484388	0.494813	0.606317	0.384958	0.696496	0.58306	0.492686		0.619128	0.0325867
29	0.894536	0.757858	0.859789	0.763701	0.682468	0.792845	0.487087	0.3833	0.396174	0.542183	0.671622	0.560245	0.654787	0.734613	0.395743	0.98512	0.397148	0.39356	0.856322	0.606812	0.470289	0.52901	0.785322	0.472349	0.476334	0.657368	0.403764	0.680709	0.581254	0.506874		0.61264	0.031482
30	0.863852	0.751989	0.812736	0.747547	0.665445	0.776429	0.449784	0.380247	0.401683	0.533812	0.663296	0.550827	0.670602	0.719269	0.410195	0.964524	0.402636	0.389827	0.832821	0.61174	0.437569	0.519505	0.772175	0.469816	0.448776	0.668432	0.412557	0.657444	0.591175	0.504554		0.602709	0.0302506
31	0.832453	0.727324	0.80151	0.698113	0.645565	0.756345	0.434518	0.371253	0.390962	0.51909	0.64908	0.548068	0.687953	0.717644	0.444685	0.947054	0.415205	0.385706	0.811108	0.614993	0.417468	0.509275	0.758073	0.463287	0.445561	0.668288	0.41872	0.645736	0.593562	0.509155		0.594259	0.0289483
32	0.80938	0.688164	0.803962	0.660923	0.661573	0.749372	0.423615	0.354162	0.372276	0.54807	0.681291	0.537668	0.691662	0.684136	0.469411	0.902632	0.417004	0.384669	0.80055	0.619446	0.401511	0.494823	0.758039	0.448748	0.440563	0.653934	0.425869	0.64241	0.568243	0.483825		0.585931	0.0281933
33	0.781266	0.662121	0.783319	0.654809	0.656101	0.753145	0.41982	0.323377	0.354756	0.579163	0.693116	0.546173	0.670989	0.685248	0.468765	0.846047	0.417355	0.387515	0.77519	0.6252	0.386537	0.489413	0.764688	0.431791	0.431732	0.647998	0.416364	0.621129	0.550512	0.508098		0.577724	0.0274379
34	0.752575	0.620706	0.774474	0.643704	0.648051	0.743473	0.415027	0.320177	0.346208	0.603687	0.725862	0.548861	0.642546	0.664	0.462728	0.819166	0.425722	0.389095	0.732233	0.618899	0.386003	0.496127	0.759197	0.429241	0.443719	0.631844	0.406264	0.607851	0.54436	0.532913		0.571157	0.0261865
35	0.746121	0.615805	0.770337	0.619921	0.654914	0.682782	0.407748	0.32305	0.339892	0.605681	0.734969	0.553593	0.632136	0.6385	0.446623	0.773521	0.434408	0.382082	0.696377	0.593849	0.390722	0.499053	0.74862	0.438425	0.483791	0.621215	0.410391	0.598345	0.539096	0.52408		0.563535	0.0245572
36	0.759942	0.621487	0.760861	0.616757	0.649632	0.654112	0.407984	0.333452	0.337161	0.560361	0.737943	0.555685	0.635676	0.643166	0.426667	0.747958	0.442379	0.377949	0.707671	0.577401	0.401222	0.504009	0.737653	0.454954	0.498881	0.639288	0.420669	0.596651	0.549725	0.503047		0.562011	0.0239677
37	0.759299	0.628926	0.753486	0.621349	0.609491	0.653076	0.415199	0.34638	0.338112	0.534151	0.790513	0.545724	0.652482	0.631289	0.426347	0.741859	0.443817	0.376214	0.710487	0.561577	0.396789	0.527582	0.689021	0.469244	0.479212	0.677077	0.432618	0.590236	0.578851	0.510622		0.563034	0.0238189
38	0.739853	0.611311	0.752699	0.627832	0.55474	0.642011	0.419709	0.343929	0.338547	0.527448	0.807993	0.561241	0.657161	0.631273	0.42867	0.76028	0.440462	0.374875	0.696492	0.546343	0.395528	0.547656	0.662346	0.480169	0.455586	0.729402	0.434536	0.590342	0.578054	0.535945		0.562414	0.0240148
39	0.721151	0.608518	0.772809	0.626956	0.52389	0.624306	0.421988	0.328497	0.34047	0.532835	0.795709	0.57893	0.643336	0.646968	0.452276	0.774625	0.437207	0.372871	0.656143	0.534738	0.393477	0.530676	0.627284	0.475037	0.428494	0.74741	0.438547	0.57774	0.53804	0.554441		0.556845	0.0240021
40	0.71112	0.603639	0.771005	0.626617	0.49571	0.617223	0.426661	0.314268	0.352258	0.543311	0.805489	0.568656	0.631698	0.673018	0.453757	0.791855	0.434979	0.369419	0.652956	0.529802	0.386703	0.488153	0.567276	0.466371	0.418267	0.767637	0.420331	0.591303	0.528498	0.556914		0.552163	0.0247835
41	0.701907	0.582105	0.735197	0.631671	0.456318	0.610319	0.438326	0.313054	0.363078	0.516401	0.765105	0.557778	0.607262	0.6758	0.450788	0.794357	0.43808	0.367971	0.658854	0.524305	0.382532	0.482101	0.550419	0.467166	0.415812	0.780937	0.405921	0.585413	0.534639	0.565238		0.545295	0.0241643
42	0.708255	0.576612	0.704424	0.635098	0.429909	0.630314	0.441122	0.317312	0.371314	0.491836	0.688688	0.54712	0.586842	0.66253	0.454622	0.813756	0.438516	0.36512	0.671468	0.523603	0.355393	0.472035	0.537977	0.474414	0.4479	0.783022	0.400951	0.573537	0.527516	0.573172		0.540146	0.0236945
43	0.710264	0.594646	0.678432	0.630142	0.420743	0.643734	0.43474	0.311082	0.348532	0.475607	0.678624	0.537346	0.58025	0.662456	0.486897	0.841068	0.431043	0.35967	0.659261	0.530645	0.350524	0.454086	0.542611	0.507433	0.454655	0.78219	0.406529	0.561756	0.522404	0.578961		0.539211	0.0241386
44	0.686546	0.618635	0.662113	0.63391	0.429498	0.665266	0.437873	0.298478	0.333842	0.458861	0.687759	0.537194	0.577824	0.622717	0.527336	0.85391	0.418772	0.353625	0.65568	0.538078	0.341114	0.425864	0.54301	0.523352	0.446597	0.846715	0.41438	0.551037	0.548574	0.586845		0.540847	0.0254293
45	0.684964	0.669047	0.638471	0.624287	0.433362	0.664211	0.452608	0.295384	0.336213	0.46143	0.696199	0.529808	0.56039	0.600001	0.521582	0.86673	0.423589	0.349429	0.658065	0.545493	0.330308	0.435037	0.547065	0.505932	0.444952	0.861884	0.418147	0.549003	0.569563	0.597005		0.542339	0.0259004
46	0.692103	0.680412	0.631399	0.631536	0.462371	0.60456	0.461814	0.286347	0.336514	0.445482	0.719307	0.518147	0.538714	0.581156	0.513868	0.865058	0.43511	0.348244	0.686358	0.553148	0.329115	0.470544	0.561177	0.490421	0.429502	0.829852	0.413725	0.541928	0.568111	0.567988		0.5398	0.0255188
47	0.689655	0.673907	0.629091	0.642529	0.475673	0.571883	0.458311	0.274732	0.308367	0.436901	0.726905	0.520382	0.529751	0.574219	0.52192	0.864692	0.444287	0.346154	0.705005	0.561222	0.328039	0.47113	0.575502	0.48767	0.434156	0.803992	0.423	0.556548	0.538187	0.542601		0.537214	0.0256035
48	0.688075	0.680202	0.63219	0.641063	0.451126	0.556244	0.455917	0.251801	0.301164	0.438203	0.676043	0.527414	0.509048	0.585982	0.514342	0.83032	0.45843	0.34596	0.709281	0.567692	0.330308	0.464089	0.579781	0.481553	0.439581	0.781787	0.445986	0.555436	0.524575	0.520941		0.531484	0.0248486
49	0.686746	0.707056	0.629703	0.63055	0.465889	0.54149	0.460733	0.241405	0.301828	0.439283	0.646112	0.519312	0.510627	0.619525	0.496323	0.789374	0.471401	0.34782	0.69054	0.576484	0.320477	0.446751	0.556051	0.474734	0.434284	0.744632	0.447826	0.547092	0.496362	0.543098		0.526117	0.0240026
50	0.6783	0.701489	0.626027	0.634721	0.473118	0.542764	0.452233	0.240344	0.312066	0.4675	0.654228	0.483978	0.504268	0.613339	0.480515	0.761406	0.485144	0.350877	0.658695	0.584682	0.289559	0.40953	0.503057	0.451289	0.427796	0.745333	0.440951	0.532634	0.501505	0.562643		0.519	0.0238141
51	0.666134	0.702847	0.613902	0.654342	0.464475	0.543212	0.4381	0.245872	0.306779	0.476187	0.681693	0.482342	0.510796	0.574828	0.461513	0.732209	0.488172	0.354192	0.680585	0.592131	0.285628	0.402306	0.497074	0.438572	0.43162	0.738582	0.431863	0.519647	0.503052	0.544241		0.51543	0.0237965
52	0.658152	0.719216	0.595789	0.679727	0.464002	0.541689	0.426545	0.25146	0.308418	0.468815	0.670328	0.509913	0.541455	0.579514	0.436035	0.704055	0.489503	0.3524	0.744177	0.616363	0.273347	0.401281	0.501071	0.448294	0.426632	0.710053	0.417397	0.509185	0.511157	0.56294		0.517297	0.0243461
53	0.6618	0.719868	0.612589	0.70488	0.466356	0.535915	0.426642	0.251396	0.309794	0.457354	0.668969	0.526019	0.559559	0.631049	0.425257	0.691875	0.485953	0.34588	0.895371	0.633325	0.254199	0.402035	0.506649	0.448311	0.395949	0.709387	0.415396	0.512029	0.503913	0.577837		0.524518	0.0273318
54	0.665133	0.699888	0.619652	0.723577	0.460204	0.529689	0.428001	0.25296	0.301896	0.466911	0.64064	0.528783	0.569696	0.629427	0.443056	0.686126	0.475445	0.340934	0.94354	0.643195	0.249771	0.422467	0.503914	0.422279	0.38129	0.71682	0.411702	0.512326	0.49935	0.554269		0.524098	0.0282241
55	0.679992	0.707119	0.597524	0.715206	0.46318	0.531495	0.42092	0.254293	0.295357	0.481735	0.617381	0.529219	0.566014	0.624761	0.44705	0.69852	0.471131	0.338919	0.962074	0.646459	0.254394	0.428212	0.511054	0.40549	0.367685	0.740379	0.407596	0.5183	0.497539	0.533192		0.52374	0.0288418
56	0.685915	0.719303	0.578715	0.71923	0.489711	0.527902	0.418813	0.257696	0.292103	0.472396	0.613601	0.532301	0.542433	0.621407	0.44071	0.7107	0.468137	0.33893	0.913314	0.651077	0.258534	0.419345	0.515878	0.394064	0.370358	0.726191	0.401503	0.514941	0.478013	0.556549		0.520992	0.0281771
57	0.68288	0.718652	0.587227	0.729927	0.511843	0.522655	0.433191	0.251833	0.28853	0.463793	0.573517	0.542861	0.516661	0.609067	0.430868	0.728815	0.46405	0.337459	0.839395	0.676903	0.2549	0.417177	0.510684	0.4144	0.371723	0.698932	0.398916	0.499438	0.477764	0.517711		0.515726	0.027106
58	0.679908	0.738379	0.607265	0.742151	0.542763	0.508728	0.441899	0.250598	0.290081	0.474376	0.51874	0.555803	0.506281	0.572911	0.439643	0.736826	0.462893	0.335404	0.777709	0.6913	0.252628	0.415466	0.489077	0.414551	0.370078	0.664945	0.408638	0.484936	0.473007	0.466686		0.510456	0.0264631
59	0.674686	0.754438	0.622058	0.768486	0.571296	0.496946	0.435086	0.240281	0.295182	0.485695	0.560931	0.551333	0.50622	0.580266	0.438725	0.710635	0.466611	0.335054	0.719436	0.692383	0.248296	0.413836	0.48805	0.425232	0.377152	0.635291	0.413317	0.495599	0.481746	0.446902		0.511039	0.0260972
60	0.672456	0.768404	0.611595	0.79089	0.576134	0.464254	0.427506	0.239879	0.301557	0.483604	0.577424	0.529714	0.508555	0.57441	0.416813	0.661372	0.466146	0.333726	0.630948	0.691042	0.236218	0.426781	0.460874	0.420382	0.373522	0.63025	0.402071	0.522944	0.48803	0.431113		0.503954	0.0257461
61	0.664016	0.7907	0.606948	0.817078	0.562093	0.449725	0.42587	0.245447	0.305619	0.469658	0.595588	0.522552	0.514921	0.663707	0.414443	0.620895	0.472996	0.331448	0.589278	0.6859	0.232644	0.419752	0.456678	0.424235	0.376489	0.637278	0.394445	0.532277	0.478852	0.427544		0.504303	0.0263922
62	0.672199	0.79749	0.609307	0.807056	0.559943	0.444453	0.427821	0.248442	0.305229	0.474497	0.61448	0.532909	0.522158	0.67263	0.430418	0.600294	0.484694	0.330761	0.555677	0.685195	0.237459	0.418991	0.463337	0.437445	0.379041	0.613934	0.402475	0.52509	0.491615	0.426076		0.505704	0.025972
63	0.68765	0.80182	0.635258	0.797579	0.54137	0.445304	0.44115	0.255955	0.305499	0.477284	0.635268	0.549835	0.534385	0.656108	0.452329	0.591687	0.494711	0.330921	0.533136	0.702434	0.238708	0.414916	0.47609	0.433179	0.39147	0.611871	0.41813	0.534585	0.523571	0.423552		0.511192	0.0258714
64	0.718306	0.825838	0.675419	0.793961	0.510545	0.447505	0.45729	0.260153	0.324329	0.467486	0.600731	0.559986	0.523446	0.648468	0.467871	0.580217	0.490009	0.329788	0.520903	0.71573	0.235854	0.396573	0.481664	0.418704	0.384788	0.619041	0.424402	0.537826	0.534375	0.428403		0.512654	0.0264469
65	0.724163	0.864889	0.674671	0.804609	0.524267	0.443443	0.470309	0.277944	0.34394	0.455436	0.586528	0.569933	0.526518	0.615326	0.450782	0.578742	0.490947	0.329708	0.508516	0.729544	0.233819	0.390772	0.473705	0.419621	0.373852	0.609836	0.438256	0.5202	0.548743	0.41168		0.513023	0.0269328
66	0.709216	0.917157	0.656126	0.81977	0.525845	0.449003	0.475671	0.289264	0.345699	0.468347	0.608792	0.571644	0.546533	0.611263	0.441924	0.575889	0.49517	0.330097	0.496844	0.752678	0.250608	0.370755	0.483718	0.403938	0.369198	0.590779	0.437162	0.518747	0.580573	0.407534		0.516665	0.0278676
67	0.69682	0.959434	0.646338	0.825651	0.526675	0.464314	0.473859	0.303852	0.34858	0.487256	0.656241	0.576717	0.54648	0.591372	0.421506	0.567654	0.503069	0.330761	0.490372	0.781313	0.253089	0.368961	0.48731	0.41281	0.38414	0.576992	0.44454	0.516444	0.594497	0.398426		0.521182	0.0286742
68	0.68716	0.982131	0.644009	0.8213	0.547204	0.470202	0.477395	0.31312	0.352255	0.500627	0.701715	0.567185	0.532207	0.611545	0.421921	0.556162	0.513716	0.33269	0.496051	0.807839	0.234704	0.374243	0.496753	0.430924	0.393413	0.58992	0.452383	0.520815	0.589993	0.394373		0.527132	0.0294201
69	0.692748	1	0.657268	0.817015	0.575071	0.479137	0.485511	0.321206	0.357603	0.514394	0.711426	0.576809	0.515408	0.611209	0.443601	0.556424	0.516306	0.336841	0.514275	0.807376	0.228184	0.377416	0.507506	0.46473	0.394995	0.598898	0.450404	0.527717	0.618871	0.405476		0.535461	0.0295919
70	0.712675	0.979316	0.668292	0.81263	0.609077	0.479734	0.495189	0.313111	0.368621	0.511236	0.684141	0.568821	0.511715	0.575494	0.446256	0.553517	0.51343	0.336074	0.540697	0.800919	0.227376	0.38844	0.520001	0.485129	0.427136	0.597871	0.449488	0.528057	0.613918	0.411383		0.537658	0.0287494
71	0.737891	0.962776	0.654541	0.796063	0.615915	0.473447	0.505213	0.288871	0.371383	0.51802	0.66676	0.55941	0.489396	0.586568	0.447322	0.551162	0.518598	0.33431	0.525053	0.804088	0.232768	0.388396	0.53587	0.465058	0.4451	0.60207	0.454983	0.535663	0.62319	0.414977		0.536829	0.0285262
72	0.77701	0.928387	0.654722	0.794661	0.607878	0.447719	0.516699	0.287735	0.370756	0.533419	0.673491	0.55821	0.47856	0.596061	0.490369	0.54808	0.529885	0.335072	0.511092	0.809275	0.229241	0.388978	0.535013	0.464865	0.448912	0.599694	0.461103	0.542426	0.639422	0.402282		0.538701	0.0284868
73	0.786244	0.90265	0.657343	0.797369	0.579794	0.442408	0.529067	0.293624	0.372437	0.545536	0.677322	0.562512	0.459406	0.613377	0.494161	0.548233	0.541734	0.338289	0.499542	0.812218	0.217392	0.38783	0.532321	0.474107	0.455257	0.610789	0.469618	0.560672	0.689353	0.387961		0.541285	0.0287001
74	0.777917	0.842793	0.66525	0.824317	0.531542	0.430561	0.544263	0.30086	0.362835	0.568625	0.689645	0.575007	0.464314	0.626196	0.492662	0.535003	0.55292	0.345067	0.49642	0.819997	0.211529	0.383429	0.536313	0.502162	0.457917	0.641544	0.475729	0.554201	0.74119	0.387345		0.544585	0.028811
75	0.75776	0.818893	0.685324	0.831398	0.508544	0.438192	0.571204	0.298943	0.345911	0.598866	0.711456	0.581922	0.476514	0.666118	0.513542	0.525435	0.552405	0.352652	0.498286	0.844173	0.201901	0.383014	0.536756	0.539847	0.460217	0.648709	0.491702	0.573286	0.757152	0.396543		0.552222	0.0293251
76	0.77303	0.801075	0.715732	0.836673	0.508248	0.441825	0.584099	0.293933	0.330957	0.678794	0.730122	0.584036	0.47683	0.698982	0.516013	0.514965	0.547263	0.352285	0.507806	0.85609	0.207053	0.397952	0.545571	0.603967	0.467628	0.644011	0.532699	0.580914	0.75241	0.409235		0.563007	0.0299718
77	0.797871	0.80727	0.741926	0.850443	0.524128	0.449954	0.592922	0.297781	0.325647	0.724172	0.729172	0.589486	0.477993	0.734341	0.512748	0.509358	0.553533	0.350196	0.563075	0.861074	0.218899	0.413461	0.54412	0.638354	0.486475	0.628968	0.561219	0.593589	0.777893	0.421203		0.575909	0.0307206
78	0.830659	0.821885	0.760864	0.863468	0.549603	0.452995	0.605142	0.305404	0.344963	0.764743	0.746411	0.584548	0.488019	0.737209	0.479839	0.508511	0.561923	0.3526	0.580626	0.864501	0.244577	0.436875	0.56104	0.733032	0.552775	0.606155	0.601271	0.607683	0.806925	0.407455		0.592057	0.0314806
79	0.876827	0.824986	0.760365	0.847335	0.572133	0.450247	0.619364	0.309735	0.400044	0.758687	0.765576	0.590982	0.494604	0.752176	0.485249	0.526063	0.57194	0.357043	0.582924	0.864932	0.250949	0.458755	0.56713	0.769253	0.577793	0.600521	0.617516	0.628635	0.836436	0.395326		0.603784	0.0315924
80	0.900365	0.814698	0.745089	0.838151	0.610613	0.445524	0.626953	0.316945	0.409971	0.783447	0.842054	0.608819	0.494451	0.731469	0.491411	0.552676	0.568577	0.366712	0.570793	0.849506	0.252303	0.477357	0.560982	0.783551	0.592378	0.665397	0.644678	0.671387	0.844573	0.390306		0.615038	0.0319462
81	0.957348	0.798899	0.727837	0.806498	0.618159	0.460401	0.630354	0.321512	0.401149	0.833133	0.883187	0.614654	0.501071	0.73148	0.51177	0.584671	0.560773	0.369202	0.525783	0.850281	0.246487	0.491861	0.582536	0.798772	0.620273	0.689577	0.689373	0.712435	0.880152	0.394688		0.626477	0.0332535
82	1	0.747353	0.737441	0.801459	0.626768	0.469017	0.637227	0.307859	0.357627	0.856672	0.899143	0.634844	0.532681	0.755322	0.540146	0.625174	0.558622	0.368938	0.511481	0.865403	0.24571	0.491291	0.594992	0.792777	0.624601	0.706768	0.718509	0.775653	0.912938	0.389916		0.636211	0.0349306
83	0.988121	0.717933	0.748712	0.807405	0.65663	0.466305	0.637717	0.296729	0.33635	0.916174	0.928904	0.654068	0.540805	0.779646	0.558135	0.63001	0.561071	0.371417	0.499005	0.885474	0.252498	0.500963	0.592003	0.784111	0.656704	0.740642	0.745024	0.83022	0.930997	0.402228		0.6472	0.036389
84	0.955282	0.711288	0.750234	0.825881	0.632502	0.46405	0.633067	0.309426	0.331368	0.941992	0.967757	0.684661	0.559944	0.808473	0.59224	0.632874	0.556283	0.377033	0.494733	0.903564	0.256808	0.505902	0.580126	0.776307	0.716539	0.744432	0.76653	0.874839	0.952477	0.417072		0.657456	0.0372064
85	0.940006	0.721059	0.753414	0.859258	0.565273	0.466753	0.65058	0.326644	0.336569	0.936328	0.942027	0.693133	0.58788	0.859884	0.617505	0.657175	0.554598	0.381006	0.479687	0.912066	0.273867	0.518218	0.602805	0.746334	0.688167	0.741852	0.777992	0.921184	1	0.415636		0.66423	0.0375392
86	0.936399	0.700699	0.753557	0.876764	0.513604	0.46954	0.654869	0.362497	0.330383	0.942848	0.955898	0.728399	0.657406	0.869587	0.639417	0.665765	0.549845	0.383095	0.469388	0.902018	0.286657	0.533603	0.647675	0.749922	0.655254	0.769279	0.789381	0.966843	0.998817	0.440594		0.673333	0.0376475
87	0.927186	0.688018	0.762041	0.869486	0.498894	0.474149	0.658067	0.363115	0.323553	0.92624	0.962468	0.756083	0.722733	0.940264	0.66906	0.663639	0.552199	0.383777	0.472988	0.890353	0.299079	0.545041	0.662059	0.777031	0.59481	0.81975	0.793596	0.988013	0.903924	0.445799		0.677781	0.0375504
88	0.926907	0.687198	0.777454	0.825245	0.47602	0.504696	0.654272	0.3674	0.314526	0.950037	0.911495	0.780479	0.852518	0.966703	0.728419	0.641907	0.559208	0.383044	0.499547	0.878317	0.306596	0.560095	0.697583	0.851672	0.534649	0.849657	0.79557	1	0.859554	0.465265		0.686868	0.0378916
89	0.9041	0.685576	0.806163	0.802726	0.471292	0.537165	0.639196	0.377801	0.317109	1	0.924408	0.785979	0.907731	0.996067	0.748458	0.620731	0.555619	0.38104	0.507014	0.861844	0.312132	0.565421	0.733696	0.911375	0.52514	0.896247	0.806009	0.95689	0.858197	0.515692		0.697027	0.0384954
90	0.911493	0.679854	0.830156	0.774564	0.53894	0.633047	0.616175	0.383366	0.324867	0.986273	0.912098	0.805235	0.949785	1	0.817095	0.590086	0.552687	0.374829	0.508177	0.848348	0.346893	0.558269	0.760366	0.956699	0.506447	0.955251	0.822232	0.885636	0.834762	0.543131		0.706892	0.0379984
91	0.900267	0.695307	0.833412	0.726771	0.560029	0.680512	0.599143	0.389562	0.335108	0.910225	0.845815	0.833343	0.938255	0.994704	0.876335	0.535173	0.562509	0.359069	0.533203	0.845757	0.357252	0.546898	0.765993	0.969189	0.469625	1	0.851789	0.85254	0.798159	0.550513		0.703882	0.0375434
92	0.890277	0.712549	0.839625	0.65532	0.52795	0.780675	0.590329	0.417138	0.341729	0.882093	0.756309	0.864733	0.918723	0.957724	0.942259	0.509058	0.568893	0.351662	0.55445	0.844779	0.365574	0.547309	0.765905	0.952139	0.449401	0.99704	0.848669	0.784662	0.747806	0.574379		0.697972	0.0366598
93	0.918544	0.764927	0.8162	0.614287	0.49883	0.864158	0.582283	0.443052	0.363656	0.853015	0.730781	0.891907	0.881956	0.944415	0.992919	0.460865	0.574781	0.34999	0.578278	0.846053	0.379978	0.534109	0.790638	0.937828	0.446143	0.959759	0.831013	0.718202	0.717064	0.630355		0.6972	0.0364146
94	0.911343	0.799288	0.772879	0.560802	0.501414	0.994933	0.574227	0.47911	0.421752	0.749361	0.703205	0.914273	0.870142	0.951773	0.996445	0.443466	0.587175	0.344924	0.600624	0.847446	0.392821	0.52521	0.846976	0.848753	0.437278	0.906447	0.809945	0.653895	0.701888	0.67775		0.694185	0.0356622
95	0.845836	0.843595	0.753424	0.535302	0.486032	1	0.533568	0.554265	0.469363	0.686987	0.727225	0.946162	0.863782	0.97352	0.984103	0.426761	0.595757	0.334127	0.602897	0.851808	0.405295	0.577756	0.87018	0.800606	0.428253	0.810248	0.775853	0.591197	0.686586	0.729716		0.689674	0.0347046
96	0.811657	0.864093	0.735711	0.519867	0.452738	0.860276	0.51149	0.579925	0.608264	0.56751	0.741293	0.957973	0.875486	0.988017	0.937596	0.412176	0.628792	0.319839	0.610007	0.861732	0.425649	0.611496	0.874157	0.797383	0.4442	0.765266	0.69959	0.532478	0.701783	0.813801		0.683675	0.033333
97	0.76569	0.870911	0.710458	0.501164	0.438177	0.680682	0.48539	0.595793	0.689837	0.47001	0.797435	0.986464	0.930899	0.977035	0.944771	0.399815	0.641784	0.307582	0.627063	0.876724	0.434508	0.604189	0.873315	0.821606	0.461431	0.771656	0.659656	0.481913	0.742927	0.878871		0.680925	0.0351718
98	0.753502	0.860326	0.742164	0.487499	0.419765	0.611305	0.457377	0.590989	0.747847	0.447301	0.813345	1	0.955823	0.954658	0.987634	0.363246	0.649585	0.306678	0.680929	0.900852	0.407866	0.585287	0.87423	0.856884	0.459639	0.749039	0.615811	0.435231	0.7944	0.941442		0.681688	0.0382672
99	0.665984	0.803667	0.749112	0.477663	0.41876	0.529669	0.433556	0.597791	0.75714	0.440727	0.787696	0.960234	0.996676	0.925577	0.999627	0.355618	0.674065	0.306741	0.746608	0.925959	0.39834	0.606983	0.871343	0.925649	0.461209	0.716171	0.527604	0.424401	0.768806	1		0.675113	0.0397415
100	0.614379	0.772065	0.725525	0.470694	0.423186	0.505572	0.413858	0.611355	0.744559	0.392277	0.625387	0.951328	0.990807	0.940106	1	0.323656	0.700304	0.302762	0.787107	0.951484	0.390919	0.618545	0.890278	1	0.467341	0.714499	0.489692	0.414414	0.695494	0.998865		0.664215	0.0414846
