# Supplementary material for: Concerted action of neuroepithelial basal shrinkage and active epithelial migration ensures efficient optic cup morphogenesis
Source: eLife. 2017 Apr 4;6:e22689. doi: 10.7554/eLife.22689 (PMC5380436; doi:10.7554/eLife.22689)
Supplement: Figure 5—source data 3. — DOI: http://dx.doi.org/10.7554/eLife.22689.046 [file elife-22689-fig5-data3.xlsx]

## Sheet: Sheet1
Figure 5-source data 3
Phalloidin - Mean normalised intensity values							Instantaeneous slope
Position	Control	Rockout	Laminin Mo	Opo Mo	Ezrin Mo		Position	Control	Rockout	Laminin Mo	Opo Mo	Ezrin Mo
1	0.870696	0.865241	0.888974	0.926674	0.74654		1	#VALUE!	#VALUE!	#VALUE!	#VALUE!	#VALUE!
2	0.901667	0.91253	0.92076	0.920128	0.771123		2	0.0309709	0.0472889	0.0317861	-0.0065462	0.0245834
3	0.920139	0.854745	0.918964	0.892185	0.793392		3	0.0184721	-0.0577847	-0.0017959	-0.0279433	0.022269
4	0.924246	0.782388	0.900375	0.864107	0.803151		4	0.0041067	-0.0723569	-0.0185887	-0.0280779	0.0097591
5	0.929023	0.736246	0.856309	0.825419	0.813455		5	0.0047777	-0.0461417	-0.0440663	-0.0386879	0.0103036
6	0.938285	0.704268	0.807798	0.79098	0.812883		6	0.0092616	-0.0319788	-0.048511	-0.0344385	-0.0005715
7	0.945235	0.669486	0.757189	0.764756	0.815465		7	0.0069497	-0.034781	-0.0506088	-0.0262249	0.0025812
8	0.952844	0.645926	0.713491	0.738856	0.822173		8	0.0076098	-0.0235601	-0.0436987	-0.0258994	0.006708
9	0.962226	0.63189	0.679084	0.716755	0.825169		9	0.0093814	-0.0140362	-0.0344063	-0.0221009	0.002996
10	0.963718	0.619511	0.656926	0.701166	0.817191		10	0.0014916	-0.012379	-0.0221579	-0.0155891	-0.0079772
11	0.961376	0.614651	0.639024	0.694444	0.802111		11	-0.0023419	-0.0048606	-0.0179025	-0.0067217	-0.0150801
12	0.958408	0.603225	0.618654	0.686856	0.782965		12	-0.0029678	-0.0114252	-0.0203696	-0.0075879	-0.0191465
13	0.956893	0.58778	0.598529	0.675463	0.756704		13	-0.0015145	-0.0154452	-0.0201251	-0.0113936	-0.0262611
14	0.947775	0.570288	0.588124	0.66514	0.733657		14	-0.0091184	-0.0174917	-0.0104058	-0.0103226	-0.0230468
15	0.934386	0.558428	0.576874	0.653753	0.706654		15	-0.0133888	-0.01186	-0.0112492	-0.0113875	-0.0270033
16	0.920415	0.548976	0.563672	0.640455	0.680502		16	-0.0139712	-0.0094523	-0.0132024	-0.0132974	-0.0261519
17	0.904863	0.539836	0.551749	0.624896	0.66131		17	-0.0155518	-0.00914	-0.0119226	-0.0155591	-0.0191913
18	0.88093	0.533023	0.541743	0.611348	0.637597		18	-0.0239328	-0.0068129	-0.0100066	-0.0135487	-0.0237137
19	0.86401	0.528945	0.530757	0.596803	0.616315		19	-0.0169203	-0.0040786	-0.0109854	-0.0145442	-0.0212815
20	0.846619	0.525493	0.523711	0.580158	0.596378		20	-0.0173905	-0.0034516	-0.007046	-0.016645	-0.0199374
