# Supplementary material for: Concerted action of neuroepithelial basal shrinkage and active epithelial migration ensures efficient optic cup morphogenesis
Source: eLife journal article supplement (doi:10.7554/elife.22689), 2017-04-03
Supplement: figures [file elife-22689-figures-v1.pdf]

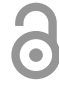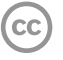

---

## Figures and figure supplements

Concerted action of neuroepithelial basal shrinkage and active epithelial migration ensures efficient optic cup morphogenesis

**Jaydeep Sidhaye and Caren Norden**

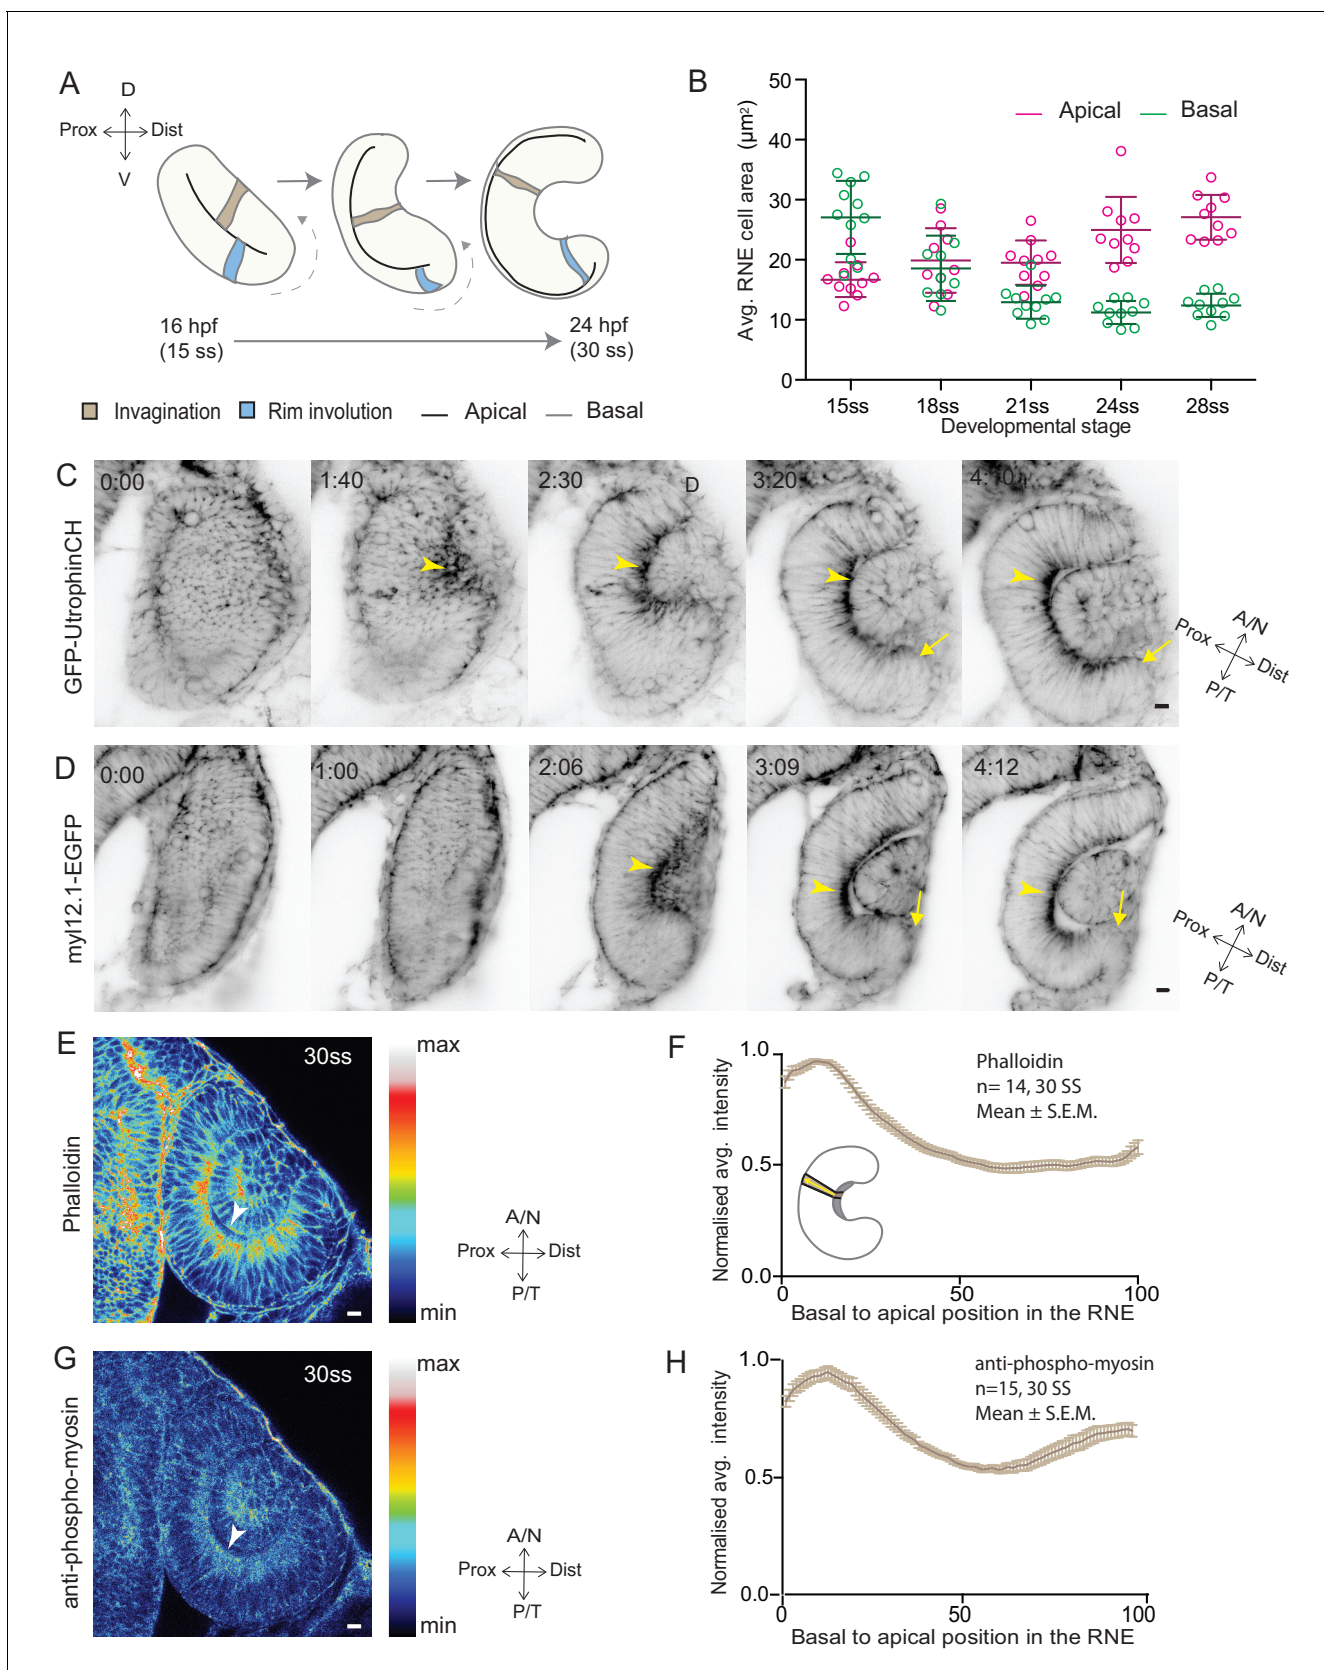

**Figure 1.** RNE invagination is accompanied by basal cell surface area shrinkage and basal actomyosin accumulation. (A) Schematic representation of RNE morphogenesis from 16 hours post fertilization (hpf) or 15 somite stage (ss) to 24 hpf or 30 ss showing RNE cells that undergo invagination (brown) Figure 1 continued on next page

*Figure 1 continued*

and rim cells that undergo rim involution (blue). Dotted arrow marks direction of rim involution. (B) Average area of RNE cells at apical (magenta) and basal (green) sides during RNE morphogenesis with mean  $\pm$  SD. N = 10 embryos. See **Figure 1—source data 1**. (C,D) Time-lapse imaging of RNE morphogenesis to assess the dynamics of actin marked by GFP-UtrophinCH (C) and of myosin marked by myl12.1-EGFP (D). Arrowhead marks basal actin and myosin enrichment in the RNE. Arrow marks the rim zone lacking the basal enrichment. Videos started around 15 ss. Time in h:min. Frames from **Videos 1** and **2**. (E,G) Confocal scan of optic cup at 30 ss immunostained for phalloidin (E) and phosphomyosin (G). The arrowhead marks enrichment at the basal side of the RNE. Lookup table indicates maximum and minimum intensity values. (F,H) Normalized average intensity distributions of phalloidin (F) and phosphomyosin (H) in the tissue volume along the apicobasal axis of the RNE at 30 ss. Mean  $\pm$  SEM. The schematic shows a typical tissue section used for analysis (Also see **Figure 1—figure supplement 1D**). Tissue sections, n = 14 for phalloidin and n = 15 for phosphomyosin; N = 5 embryos. See **Figure 1—source data 2** and **3**. All scale bars = 10  $\mu$ m. Developmental axes are shown next to the panels for orientation. D: Dorsal, V: Ventral; Prox: Proximal, Dist: Distal; A/N: Anterior or nasal, P/T: Posterior or temporal.

DOI: [10.7554/eLife.22689.002](https://doi.org/10.7554/eLife.22689.002)

The following source data is available for figure 1:

**Source data 1.** Related to **Figure 1B**, **Figure 1—figure supplement 1C**.

DOI: [10.7554/eLife.22689.003](https://doi.org/10.7554/eLife.22689.003)

**Source data 2.** Related to **Figure 1F**.

DOI: [10.7554/eLife.22689.004](https://doi.org/10.7554/eLife.22689.004)

**Source data 3.** Related to **Figure 1H**.

DOI: [10.7554/eLife.22689.005](https://doi.org/10.7554/eLife.22689.005)

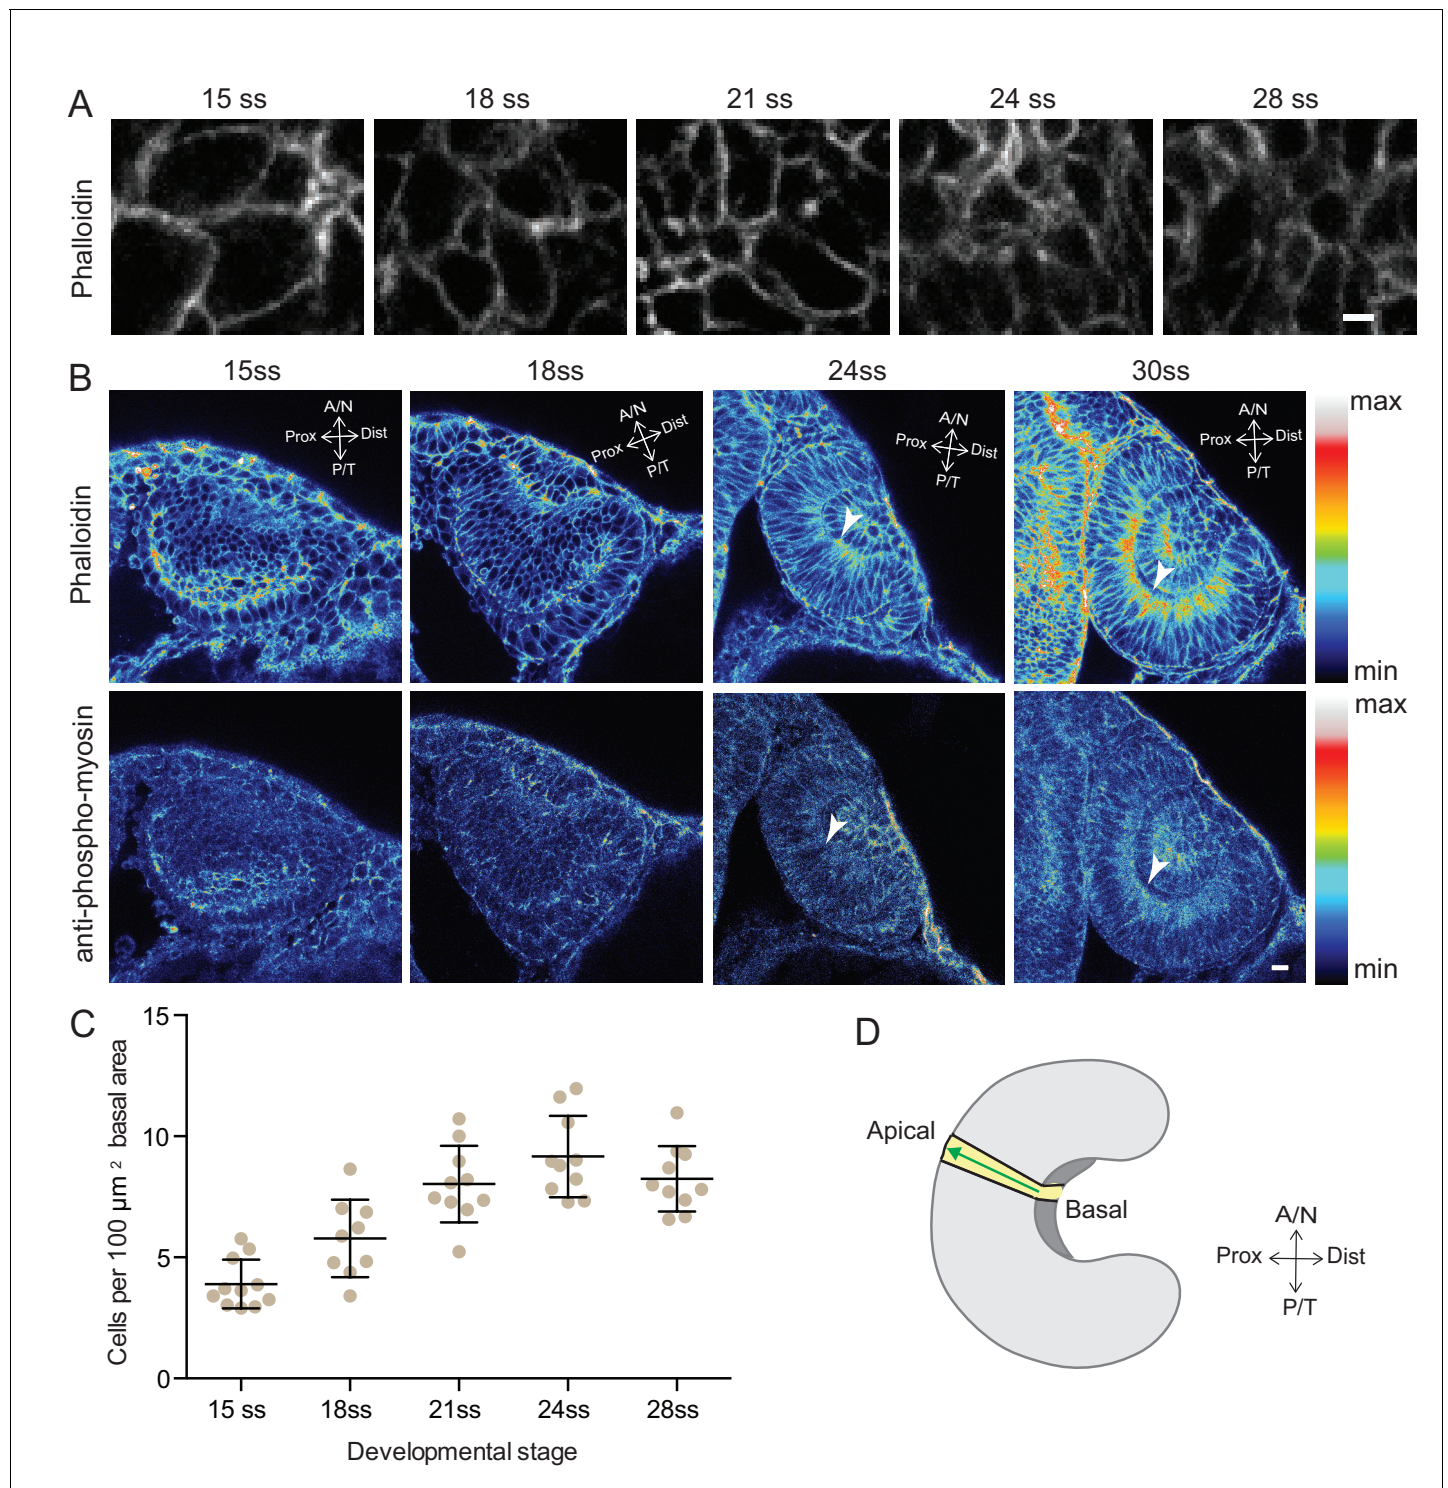

**Figure 1—figure supplement 1.** Analysis of the basal surface and actomyosin localisation during RNE invagination. **(A)** Confocal scans of the basal side of the RNE cells stained with phalloidin at different developmental stages. Scale bar = 2  $\mu\text{m}$ . **(B)** Confocal scans of different stages of RNE morphogenesis stained for phalloidin and phosphomyosin. Arrowheads point to basal enrichment. Lookup table indicates the minimum and maximum intensity values. Scale bar = 10  $\mu\text{m}$ . **(C)** Average number of cells per 100  $\mu\text{m}^2$  basal area of RNE at different stages of development. Mean  $\pm$  SD, N = 10 embryos each. See **Figure 1—source data 1**. **(D)** Schematic drawing of a typical tissue volume used for actomyosin intensity distribution analysis (yellow). The average intensity was measured from basal to apical side of the tissue volume (green arrow) and normalised to the highest intensity value along the axis. See Materials and methods for details.

DOI: [10.7554/eLife.22689.006](https://doi.org/10.7554/eLife.22689.006)



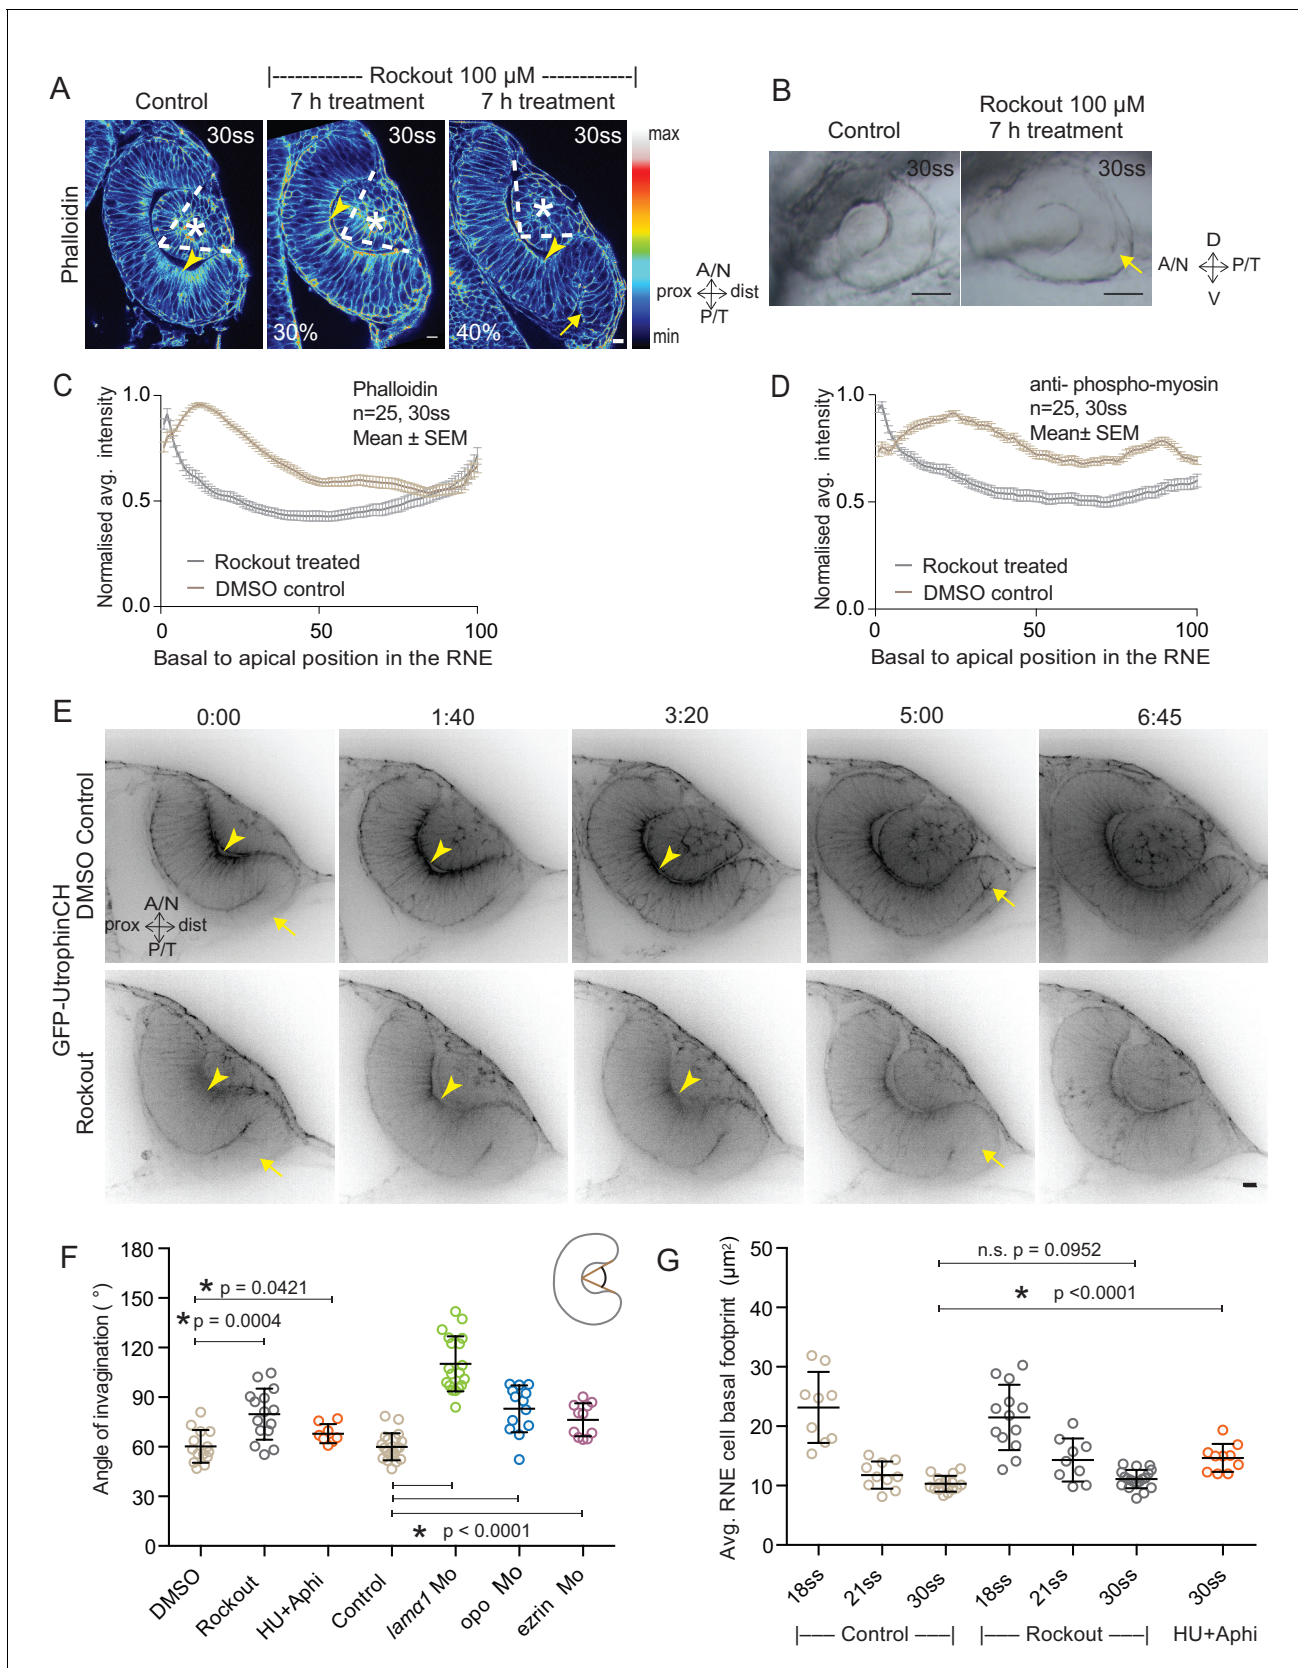

**Figure 2.** Impairment of actomyosin-driven basal constriction or proliferation does not prevent RNE formation. (A) Confocal scan of optic cup at 30ss stained for phalloidin. Control (left), phenotypes after 7 h of Rockout treatment: invagination defect in 30% embryos (middle), invagination defect with Figure 2 continued on next page

*Figure 2 continued*

epithelial accumulation in 40% embryos (right), ( $n = \text{approx. } 30 \text{ embryos}$ ,  $N = 5 \text{ experiments}$ , see **Figure 2—source data 1**). Arrowheads mark the basal side of the RNE. Arrow marks the epithelial accumulation outside the RNE. Asterisk marks the developing lens. Dashed lines indicate the angle of invagination. Rockout treatment started around 13–14 ss. Lookup table indicates the minimum and maximum intensity values. Scale bar =  $10 \mu\text{m}$ . (B) Brightfield images of optic cup at the end of the 7 h treatment. Control (left), treated with Rockout (right). Arrow marks the epithelial accumulation outside the RNE. Scale bar =  $50 \mu\text{m}$ . (C,D) Normalized average intensity distributions of phalloidin (C) and phosphomyosin (D) in the tissue volume along the apicobasal axis of the RNE at 30 ss. Mean  $\pm$  SEM. Control (brown), Rockout treated (grey). Tissue sections,  $n = 25$ ;  $N = 5 \text{ embryos}$  each. See **Figure 2—source data 2** and **3**. (E) Time-lapse of RNE morphogenesis in DMSO Control (upper) and Rockout-treated (lower) embryos expressing actin marker GFP-UtrophinCH.  $N = 5 \text{ embryos}$  each. Rockout treatment was started 2 h before imaging around 13–14 ss. Imaging started at around 18 ss. Both movies were imaged simultaneously and under identical imaging conditions. Time in h:min. Frames from **Video 3**. Scale bar =  $10 \mu\text{m}$ . (F) Invagination angle at 30 ss. Mean  $\pm$  SD. The schematic shows the invagination angle as the angle held at the base of central RNE by the inner lips of the optic cup. P values for Mann-Whitney test with Control are as follows: Rockout  $p=0.0004$ , HU+Aphi  $p=0.0421$  and for laminin a1 Mo, opo Mo and ezrin Mo  $p<0.0001$ . See **Figure 2—source data 4**. (G) Average basal area of RNE cells with mean  $\pm$  SD. Each dot represents one embryo. P values for Mann-Whitney test with 30 ss control are as follows: 30 ss Rockout  $p=0.0952$ , 30 ss HU+Aphi  $p<0.0001$ . See **Figure 2—source data 5**.

DOI: [10.7554/eLife.22689.009](https://doi.org/10.7554/eLife.22689.009)

The following source data is available for figure 2:

**Source data 1.** Related to **Figure 2A**, referred in text.

DOI: [10.7554/eLife.22689.010](https://doi.org/10.7554/eLife.22689.010)

**Source data 2.** Related to **Figure 2C**.

DOI: [10.7554/eLife.22689.011](https://doi.org/10.7554/eLife.22689.011)

**Source data 3.** Related to **Figure 2D**.

DOI: [10.7554/eLife.22689.012](https://doi.org/10.7554/eLife.22689.012)

**Source data 4.** Related to **Figure 2F**.

DOI: [10.7554/eLife.22689.013](https://doi.org/10.7554/eLife.22689.013)

**Source data 5.** Related to **Figure 2G**.

DOI: [10.7554/eLife.22689.014](https://doi.org/10.7554/eLife.22689.014)

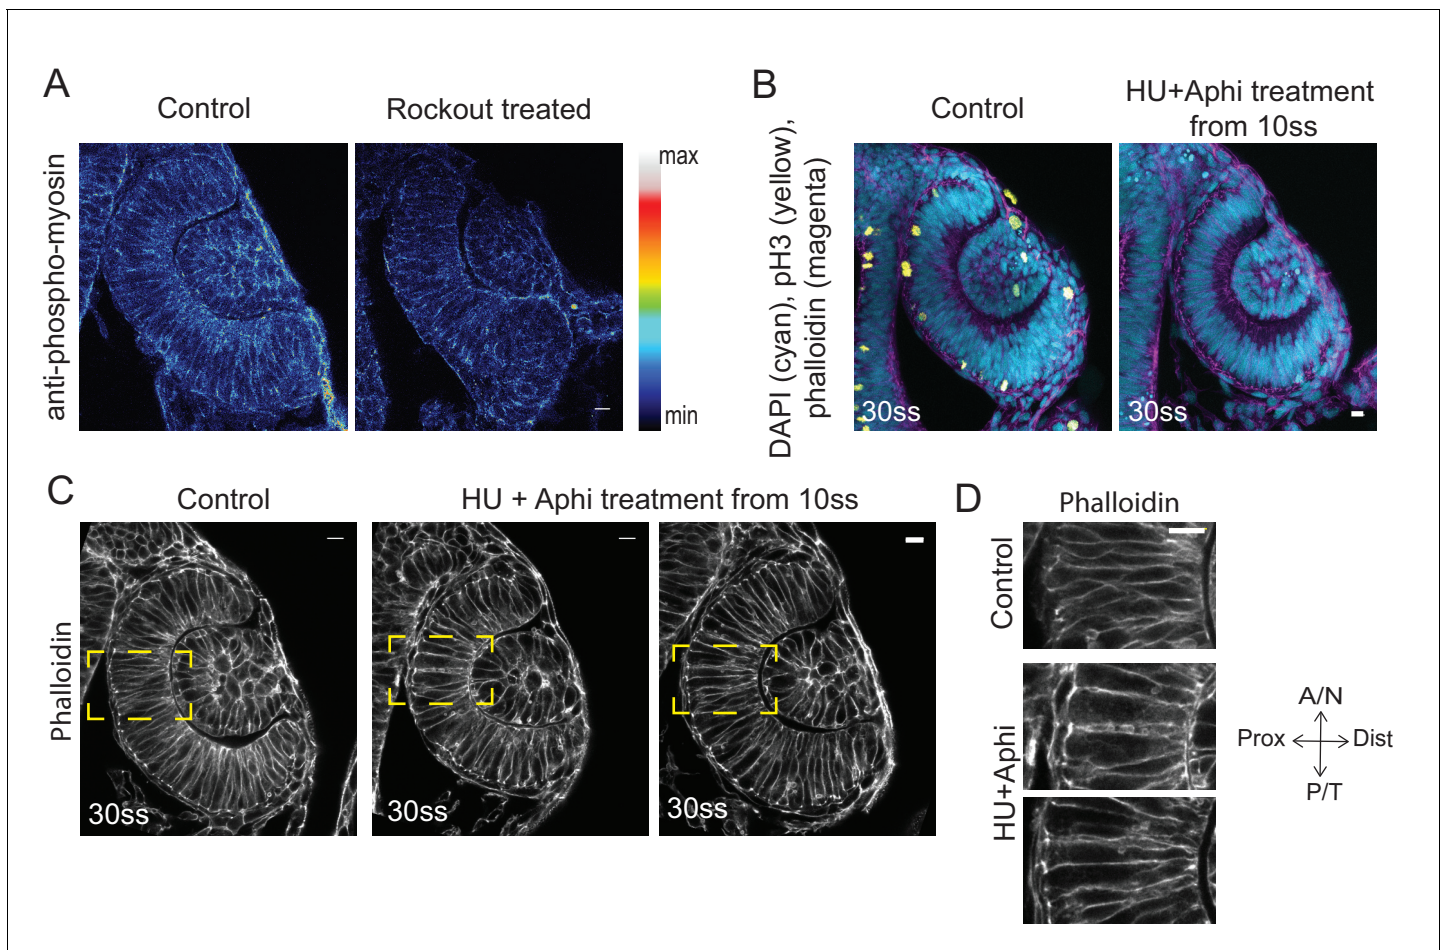

**Figure 2—figure supplement 1.** Effect of Rockout and HU+Aphi treatment on the RNE. (A) Confocal scan of 30 ss RNE in control (left) and Rockout treated (right) embryo stained for phosphomyosin. Rockout treatment was performed for 7 h starting from 13–14 ss. Lookup table indicates the minimum and maximum intensity values. (B) Confocal scans of 30 ss RNE in control (left) and HU+ Aphi treated (right) embryos stained for DAPI (cyan), mitotic marker phosphohistone-3 (yellow) and phalloidin (magenta). (C) Confocal scans of 30 ss RNE in control (left) and HU+ Aphi-treated (middle and right) embryos stained with phalloidin. Areas marked by yellow box are shown in D. (D) Confocal scans of RNE cells (zoomed images of regions marked in C). Control (top), HU+Aphi treated (middle and bottom) stained with phalloidin. All scale bars = 10 μm.

DOI: [10.7554/eLife.22689.015](https://doi.org/10.7554/eLife.22689.015)



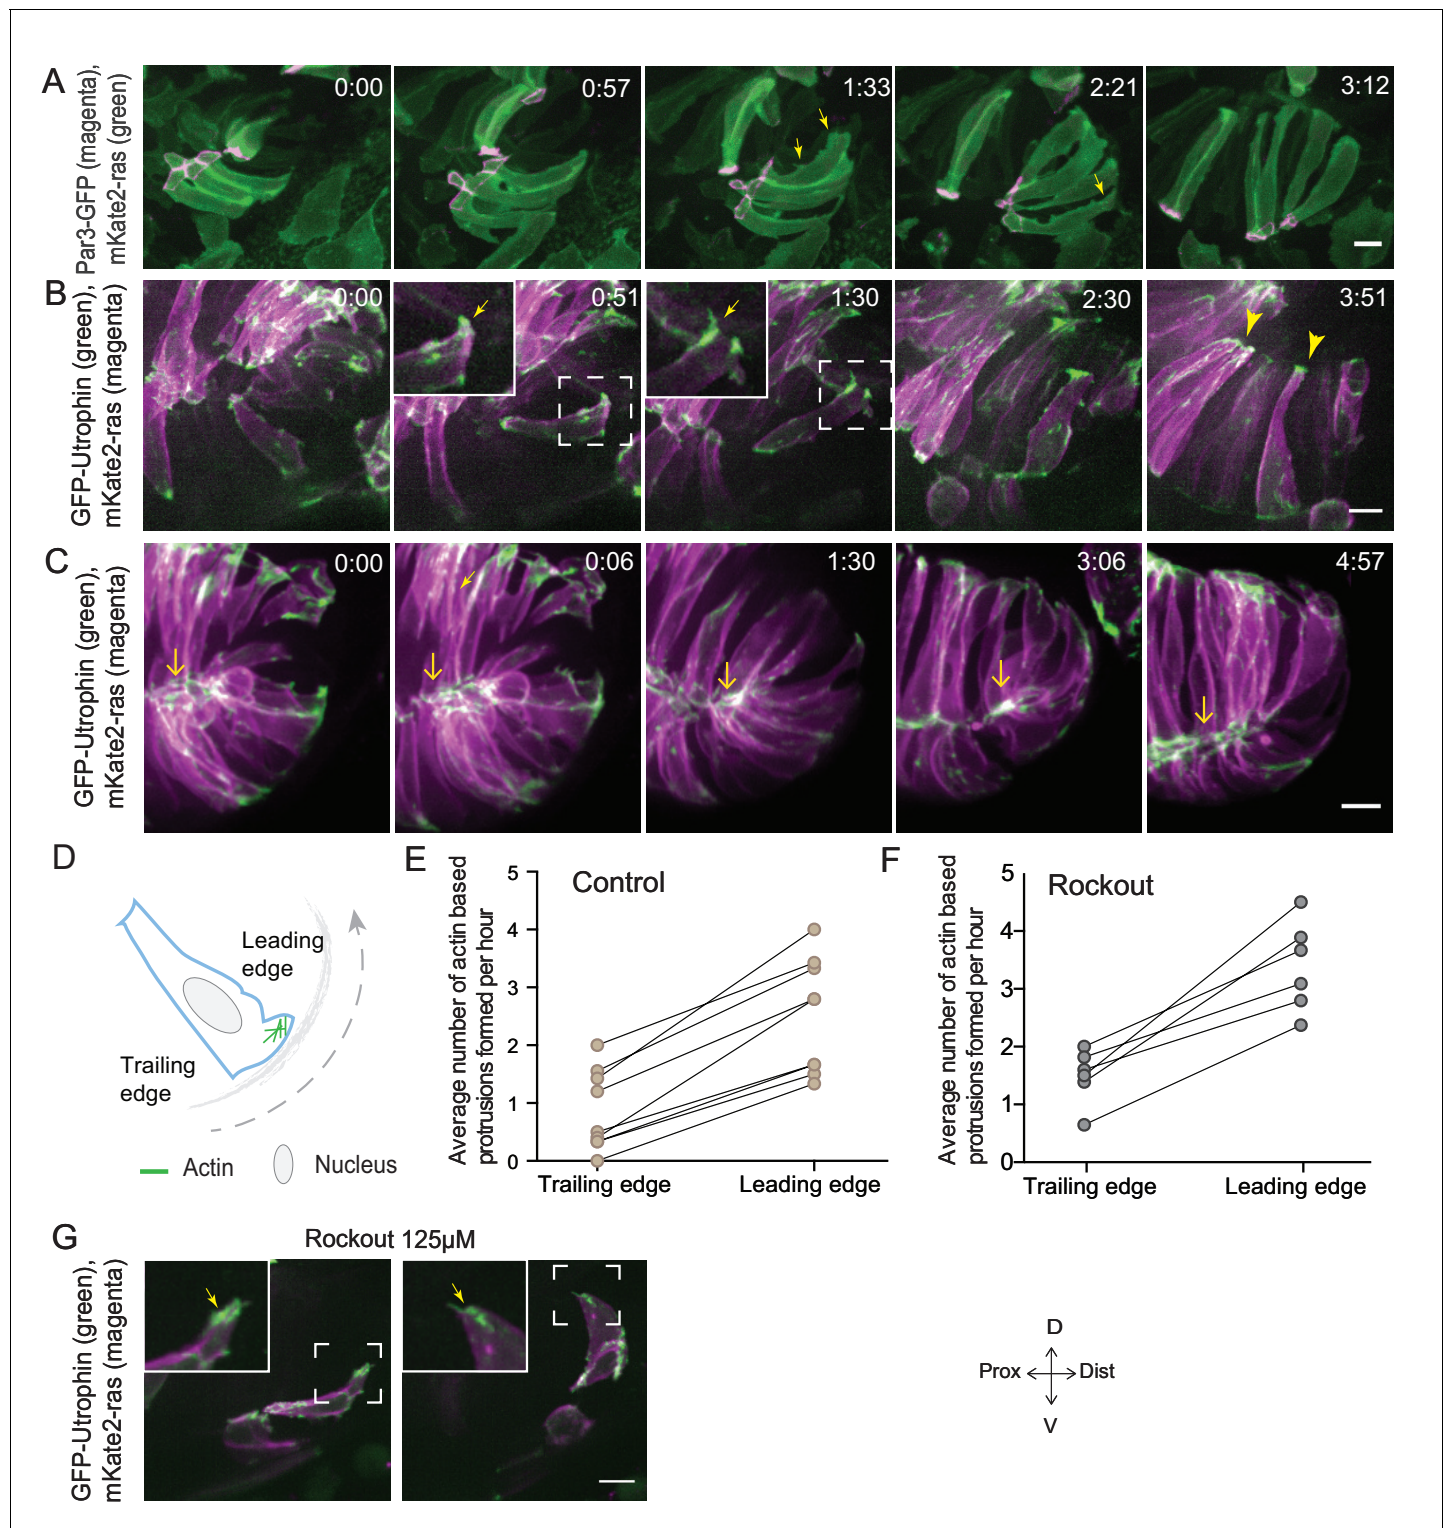

**Figure 3.** Rim involution involves active cell migration of connected epithelial cells. (A) Time-lapse imaging of rim zone with mosaic expression of Par3-GFP and mKate2-ras. Arrows show membrane protrusions. Frames from **Video 4**. N = 5. (B) Time-lapse imaging of rim zone with mosaic expression of GFP-UtrophinCH and ras-mKate2. Inlays show zoomed marked area. Arrows show actin localization in the protrusions. Arrowheads mark the basally enriched stable actin pool in the RNE. Frames from **Video 5**. N = 6. (C) Time-lapse imaging of rim zone with mosaic expression of GFP-UtrophinCH and ras-mKate2. Yellow arrows show apical actin localization at adherens junctions. Frames from **Video 7**. N = 6. (D) Schematic of a rim cell exhibiting actin based protrusions at the basal side. The arrow marks the direction of involution. The leading and lagging edges indicate the sides referred in (E) *Figure 3 continued on next page*



*Figure 3 continued*

and (F). (E) Number of actin protrusions observed per hour in rim cells in the control condition. Each pair of datapoints represents two sides of the same rim cell.  $n = 9$ ,  $N = 6$ . See **Figure 3—source data 1**. (F) Number of actin protrusions observed per hour in the rim cells in Rockout treatment condition. Each pair of datapoints represents two sides of the same rim cell.  $n = 6$ ,  $N = 6$ . See **Figure 3—source data 1**. (G) Confocal scan of rim zone in Rockout-treated embryos with mosaic expression of GFP-UtrophinCH and ras-mKate2. Inlays show enlarged marked area. Arrows show actin localization in the protrusions. Frames from **Video 6**.  $N = 6$  all scale bars =  $10\ \mu\text{m}$ . All movies started around 17 ss -18 ss, Time in h:min.

DOI: [10.7554/eLife.22689.017](https://doi.org/10.7554/eLife.22689.017)

The following source data is available for figure 3:

**Source data 1.** Related to **Figure 3E,F**.

DOI: [10.7554/eLife.22689.018](https://doi.org/10.7554/eLife.22689.018)

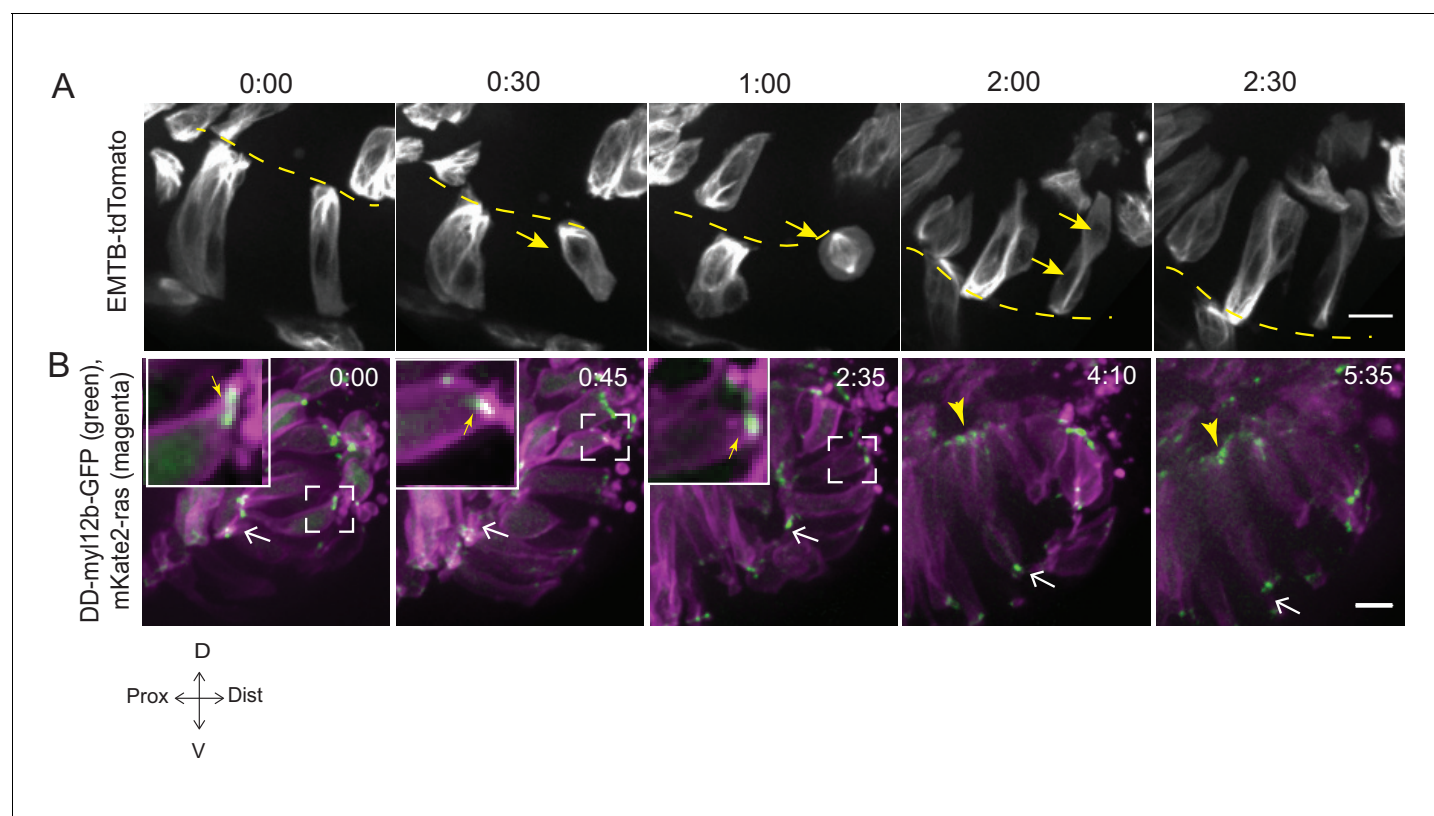

**Figure 3—figure supplement 1.** Microtubule and myosin dynamics during rim involution. (A) Time-lapse imaging of rim zone with mosaic expression of EMTB-tdTomato. Arrows mark the cell dividing during rim involution. Dashed line marks the apical side. Imaging started at 17–18 ss. N = 4. (B) Time-lapse imaging of rim zone with mosaic expression of DD-myl12b-GFP and mKate2-ras. Insets show zoomed marked area. Yellow arrows indicate basal myosin punctae in the rim cells. White arrows mark adherens junctions. Arrowheads mark basally enriched stable myosin pool in the RNE. Frames from **Video 9**. Imaging started at 15–16 ss. N = 5. Scale bars = 10  $\mu$ m, Time h:min.

DOI: [10.7554/eLife.22689.019](https://doi.org/10.7554/eLife.22689.019)

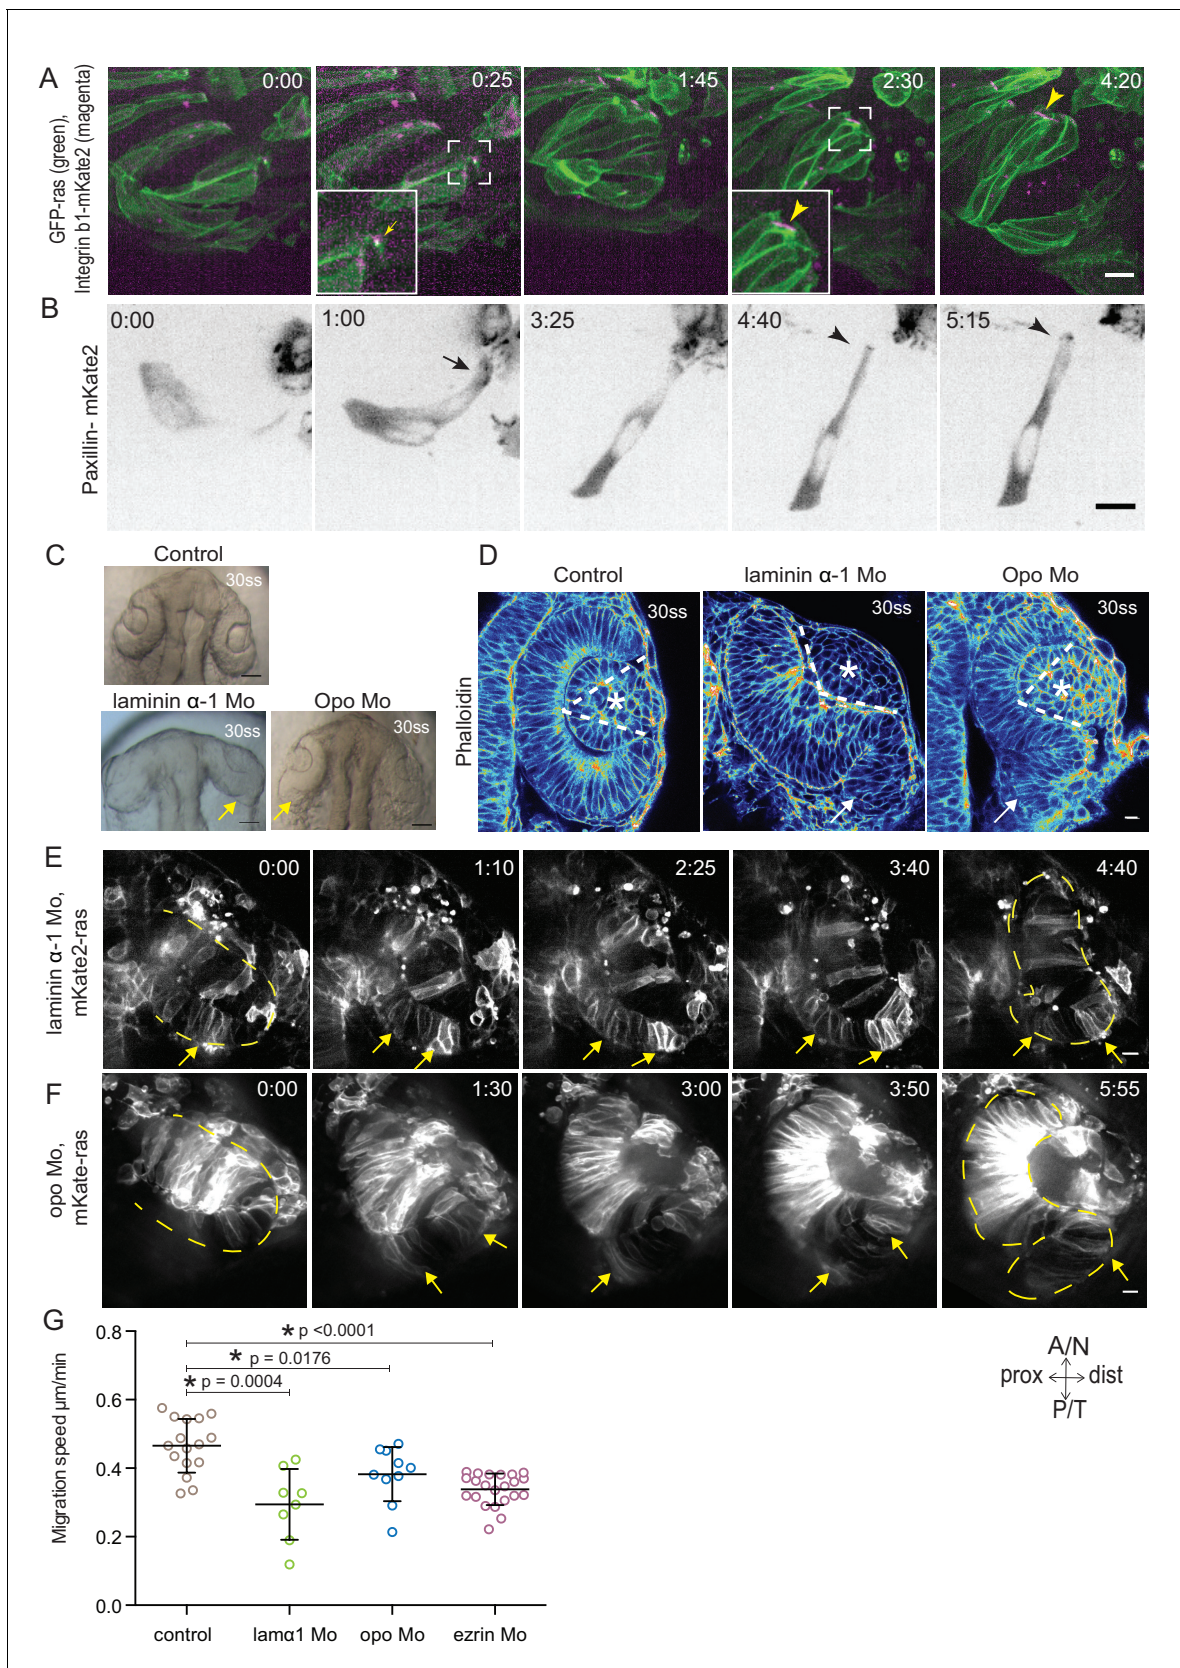

**Figure 4.** Dynamic cell-ECM attachment of rim cells is important for RNE morphogenesis. (A) Time-lapse imaging of rim zone with mosaic expression of GFP-ras and Integrin  $\beta 1$ -mKate2. Inlays show enlarged marked area. Arrow indicates the integrin foci during migration. Arrowheads mark the

Figure 4 continued on next page

*Figure 4 continued*

basally enriched stable integrin pool in the RNE cell. Frames from **Video 10**. N = 4. Scale bar = 10  $\mu$ m. Imaging started at 17–18 ss, Time in h:min. (B) Timelapse imaging of rim zone with mosaic expression of paxillin-mKate2. Arrow indicates the short-lived paxillin foci. Arrowhead marks the stable basal paxillin localization in the RNE. Frames from **Video 11**. N = 6. Scale bar = 10  $\mu$ m. Imaging started at 17–18 ss. Time in h:min. (C) Brightfield images of the dorsal view of 30 ss embryo head. Control (upper), laminin morphant (lower left) and opo morphant (lower right). Arrows mark the epithelial accumulation outside the RNE. Scale bar = 50  $\mu$ m. (D) Confocal scan of optic cups at 30 ss stained for phalloidin. Control (left), laminin morphant (middle) and opo morphant (right). Arrows mark the epithelial accumulation outside the RNE. Dashed lines indicate the angle of invagination. Asterisk marks the developing lens. Lookup table indicates the minimum and maximum intensity values. Scale bar = 10  $\mu$ m. (E,F) Time-lapse imaging of RNE morphogenesis in laminin morphant (E) and Opo morphant (F) injected mosaically with mKate2-ras RNA. Arrows mark rim cells that failed to move. Dashed line marks the outline of the developing RNE. Frames from **Videos 13** and **14**. Time in h:min. Scale bar = 10  $\mu$ m. Movies started at 16 ss–17 ss. (G) Migration speed of rim cells (Mean  $\pm$  SD). P values for Mann Whitney test with control: laminin Mo p=0.0004, opo Mo p=0.0176, ezrin Mo p<0.0001. See **Figure 4—source data 2**.

DOI: [10.7554/eLife.22689.028](https://doi.org/10.7554/eLife.22689.028)

The following source data is available for figure 4:

**Source data 1.** Related to **Figure 4—figure supplement 2D**.

DOI: [10.7554/eLife.22689.029](https://doi.org/10.7554/eLife.22689.029)

**Source data 2.** Related to **Figure 4G**.

DOI: [10.7554/eLife.22689.030](https://doi.org/10.7554/eLife.22689.030)

**Source data 3.** Related to **Figure 4—figure supplement 3C**.

DOI: [10.7554/eLife.22689.031](https://doi.org/10.7554/eLife.22689.031)

**Source data 4.** Related to **Figure 4—figure supplement 3D**.

DOI: [10.7554/eLife.22689.032](https://doi.org/10.7554/eLife.22689.032)



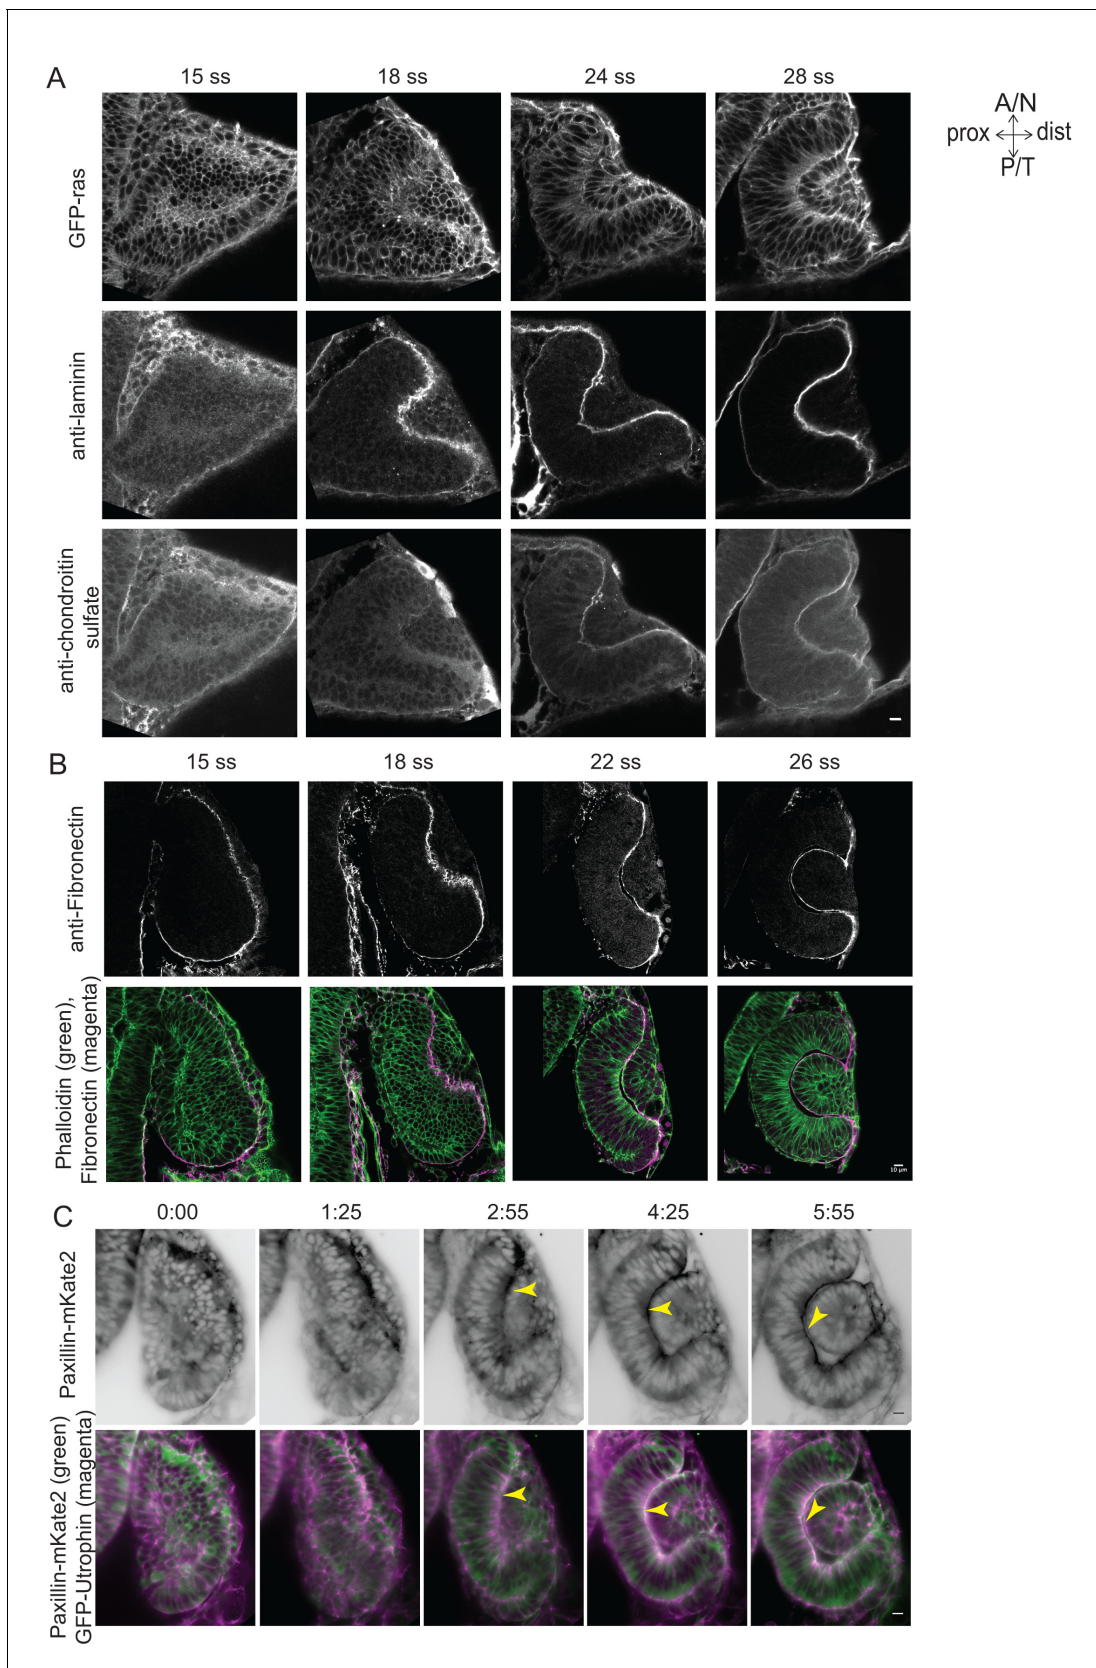

**Figure 4—figure supplement 1.** Dynamics of ECM distribution and cell-ECM attachment during RNE morphogenesis. (A) Confocal scans of immunostainings for laminin (middle) and chondroitin sulfate (bottom) in GFP-ras (top) expressing embryos across different stages of RNE

Figure 4—figure supplement 1 continued on next page

*Figure 4—figure supplement 1 continued*

morphogenesis. (B) Confocal scans of immunostainings for Fibronectin (top) and phalloidin across different stages of RNE morphogenesis. Merge (bottom). (C) Time-lapse imaging of RNE morphogenesis in embryos expressing Paxillin-mKate2 and GFP-UtrophinCH. Arrowheads point at paxillin enrichment coinciding with UtrophinCH enrichment. Frames are from **Video 12**. Imaging started at 15 ss. Time h:min. All scale bars = 10  $\mu$ m.  
[DOI: 10.7554/eLife.22689.033](https://doi.org/10.7554/eLife.22689.033)

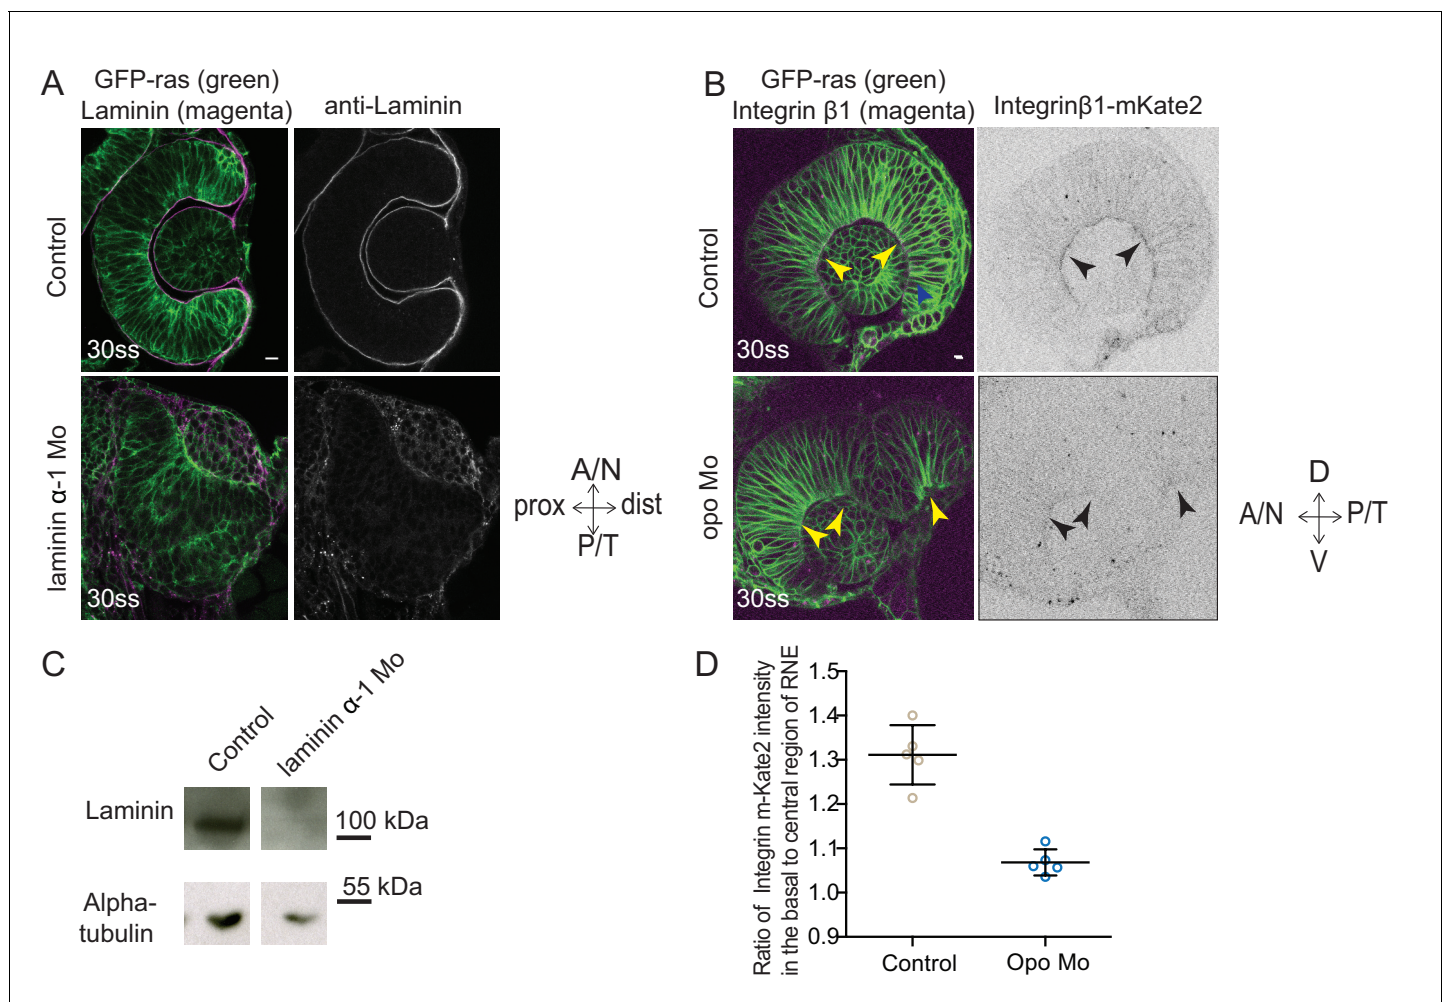

**Figure 4—figure supplement 2.** Evaluation of the efficiency of morpholino mediated knockdown of laminin  $\alpha$ -1 and opo. (A) Confocal scan of 30 ss RNE in control (top) and laminin morphants (bottom) marked with GFP-ras stained for laminin. Morphant shows S-shaped RNE and reduced laminin staining. Scale bar = 10  $\mu$ m. (B) Confocal scan of side view of 30 ss RNE in GFP-ras and Integrin- $\beta$ 1-mKate2 RNA injected control (top) and opo morphant (bottom) embryo. Morphant shows S-shaped RNE with secondary invagination zone and highly reduced basal localization of integrin. N = 5. Scale bar = 10  $\mu$ m. (C) Western blot for laminin and alpha-tubulin in control and laminin morphant. (D) Ratio of average integrin  $\beta$ 1-mKate2 signal at the basal to central region in the RNE in optical section along the apicobasal axis of the RNE at 30 ss. Mean  $\pm$  SD, N = 5 embryos. See **Figure 4—source data 1**.

DOI: [10.7554/eLife.22689.034](https://doi.org/10.7554/eLife.22689.034)



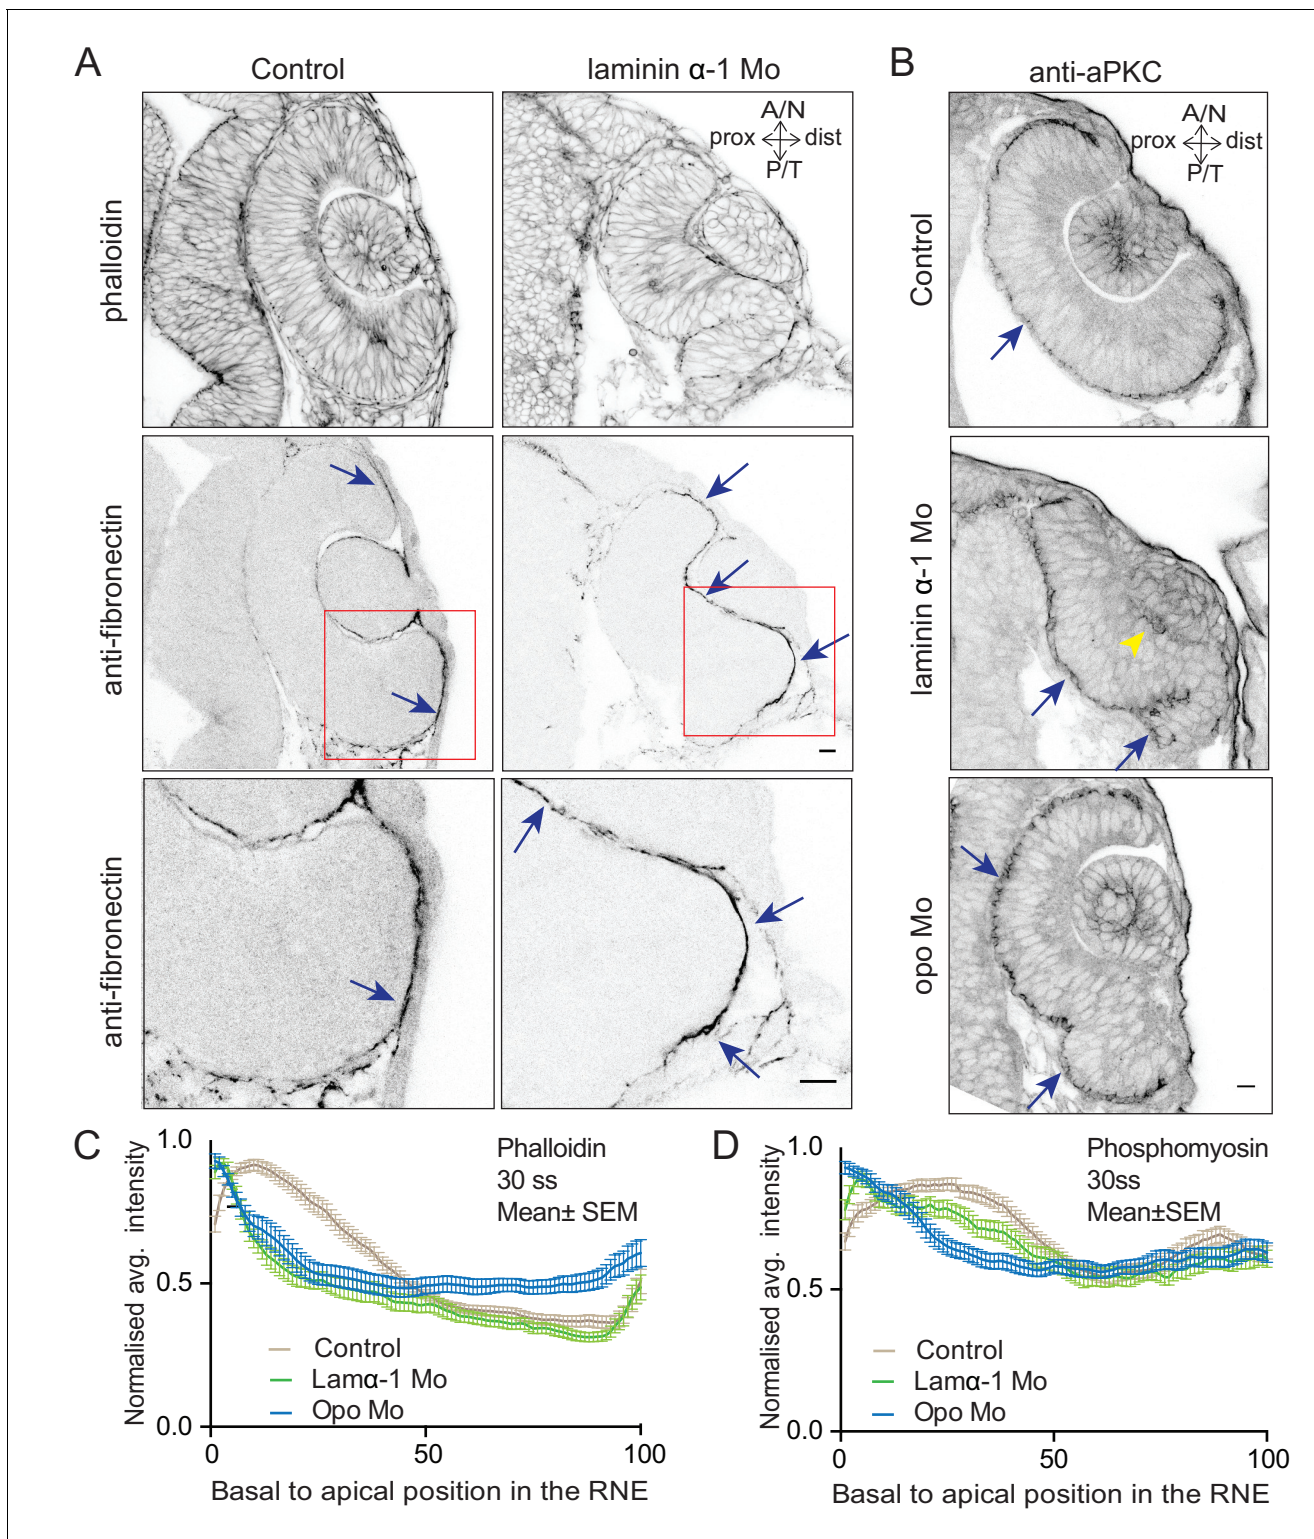

**Figure 4—figure supplement 3.** Effect of perturbed cell-ECM attachment on the optic cup. (A) Confocal scan of 30 ss RNE in control (left) and laminin morphants (right) stained for phalloidin and fibronectin. Morphant shows S-shaped RNE and arrows point at enhanced fibronectin staining. The lower panel shows a zoomed image of the area marked by the red box. N = 6. Scale bar = 10  $\mu$ m. (B) Confocal scan of 30 ss RNE in control (upper), laminin morphant (middle) and opo morphant (bottom) stained for aPKC. Morphants show S-shaped RNE. Blue arrows point at the apical domain marked by aPKC. Yellow arrowhead points at a few delaminated cells in the laminin morphant. N = 5. Scale bar = 10  $\mu$ m. (C,D) Normalized average intensity profiles. Figure 4—figure supplement 3 continued on next page



*Figure 4—figure supplement 3 continued*

distributions of phalloidin (C) and phosphomyosin (D) in tissue volume along the apicobasal axis of the RNE at 30 ss. Mean  $\pm$  SEM. Control (brown) n = 25, laminin Mo (green) n = 19 and Opo Mo (blue) n = 20. Tissue sections (n); embryos, N = 5. See **Figure 4—source data 3** and **4**.

DOI: [10.7554/eLife.22689.035](https://doi.org/10.7554/eLife.22689.035)

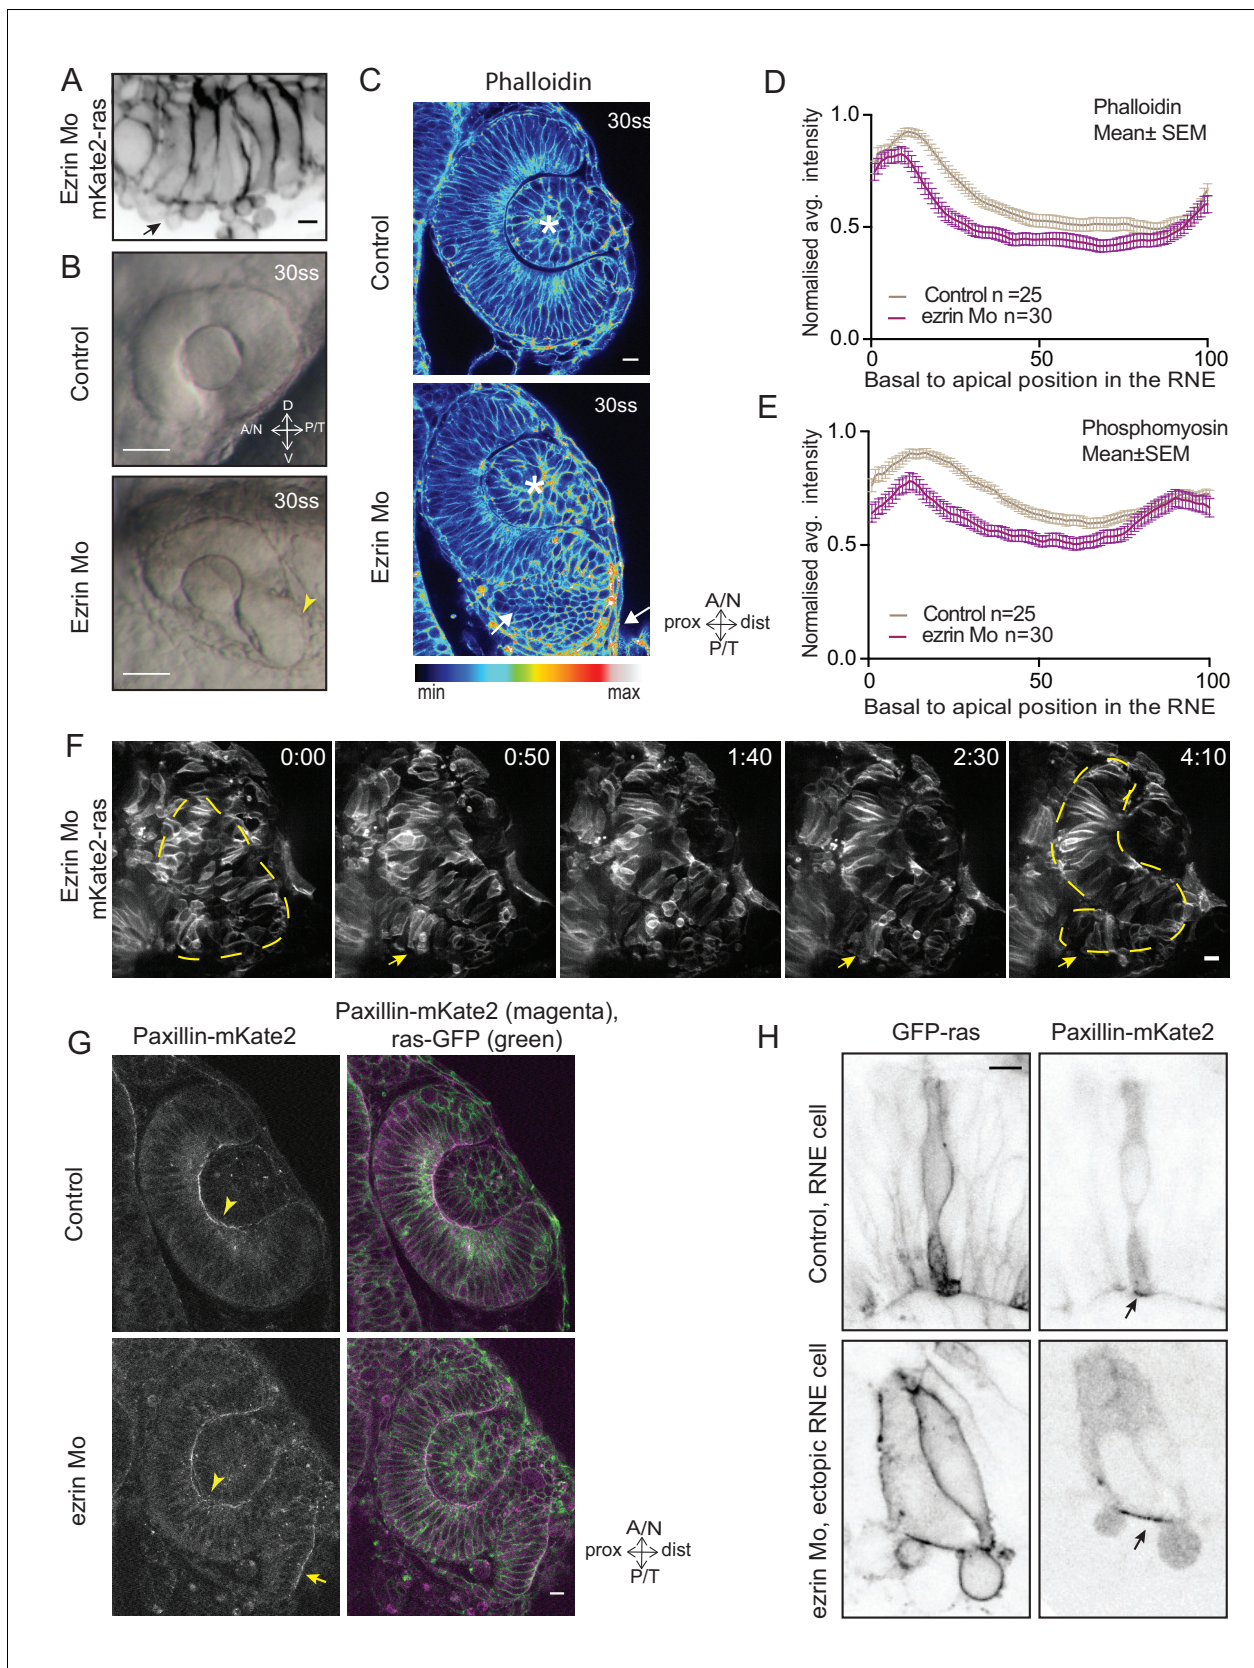

**Figure 5.** Perturbed basal lamellipodial activity leads to compromised rim involution and impairs RNE morphogenesis. (A) Confocal scan of rim cells in mKate2-ras injected ezrin morphant. Arrow indicates basal blebs in rim cells. Scale bar = 5  $\mu$ m. (B) Brightfield images of side view of 30 ss optic cup. Figure 5 continued on next page

*Figure 5 continued*

Control (top) and ezrin morphant (bottom). Arrowhead marks the epithelial accumulation outside the RNE. Scale bar = 50  $\mu\text{m}$ . (C) Confocal scan of optic cup at 30 ss stained for phalloidin. Control (top) and ezrin morphants (bottom). Arrows mark the epithelial accumulation outside the RNE. Asterisk marks the lens. Lookup table indicates the minimum and maximum intensity values. Scale bar = 10  $\mu\text{m}$ . (D,E) Normalized average intensity distributions of phalloidin (D) and phosphomyosin (E) in the tissue volume along the apicobasal axis of the RNE at 30 ss. Mean  $\pm$  SEM. Control (brown) ezrin Mo (magenta). Tissue sections, n = 25 for control and n = 30 for ezrin Mo; N = 5 embryos each. See **Figure 5—source data 1, 2**. (F) Time-lapse imaging of RNE morphogenesis in ezrin morphant injected mosaically with ras-mKate2 RNA. Arrows mark rim cells that failed to move. Dashed line marks the outline of developing RNE. Frames from **Video 18**. Time in h:min. Scale bar = 10  $\mu\text{m}$ . Imaging started at 17 ss – 18 ss. (G) Confocal scan of 30 ss optic cup expressing paxillin-mKate2 and GFP-ras. Control (top), ezrin Mo (bottom). Arrow marks paxillin enrichment at the basal side. N = 7. Scale bar = 10  $\mu\text{m}$ . (H) Confocal scan of paxillin-mKate2 and GFP-ras expressing cells. Control RNE cells (top), ectopic RNE cells in ezrin morphant (bottom). Arrow marks basal paxillin enrichment. Scale bar = 5  $\mu\text{m}$ .

DOI: [10.7554/eLife.22689.043](https://doi.org/10.7554/eLife.22689.043)

The following source data is available for figure 5:

**Source data 1.** Related to **Figure 5E**.

DOI: [10.7554/eLife.22689.044](https://doi.org/10.7554/eLife.22689.044)

**Source data 2.** Related to **Figure 5—figure supplement 2E**

DOI: [10.7554/eLife.22689.045](https://doi.org/10.7554/eLife.22689.045)

**Source data 3.** Related to **Figure 5D**.

DOI: [10.7554/eLife.22689.046](https://doi.org/10.7554/eLife.22689.046)

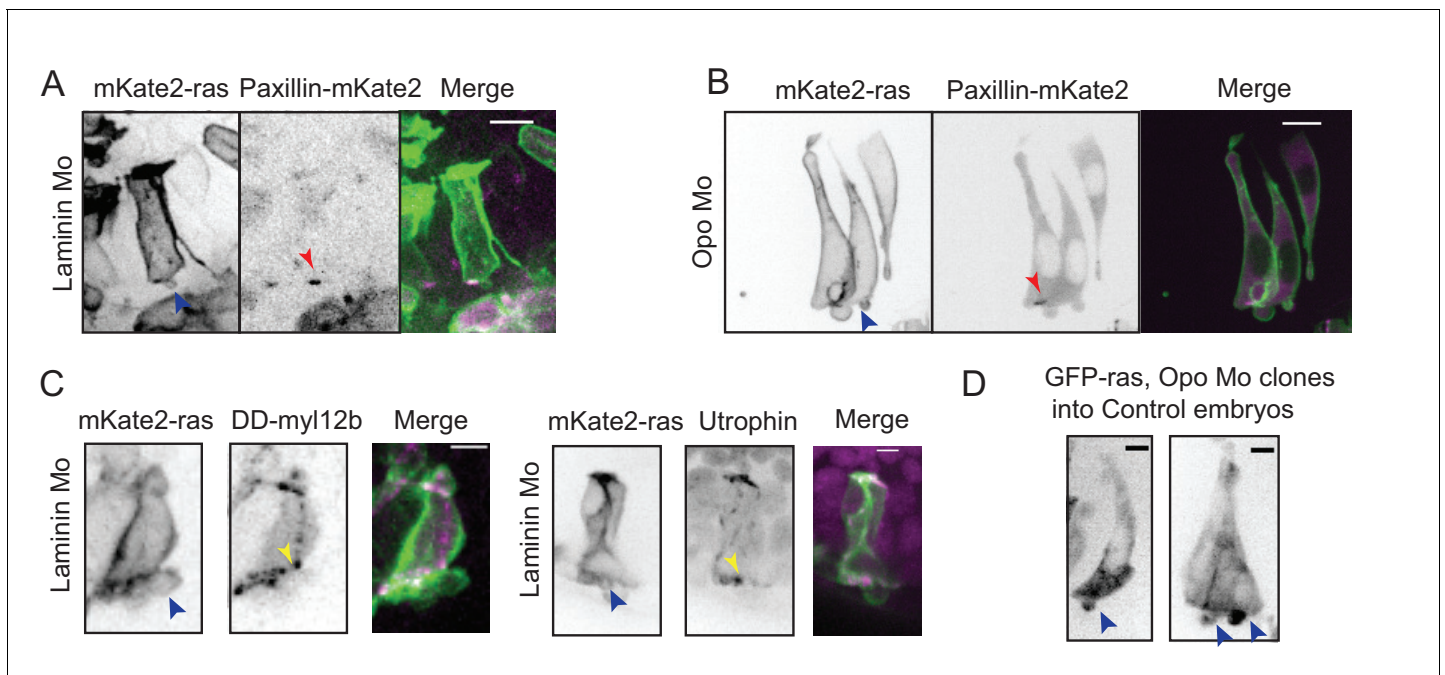

**Figure 5—figure supplement 1.** Effect of perturbed cell-ECM attachment on the rim cells. (A) Confocal scan of rim cell in laminin morphant embryos with mosaic expression of mKate2-ras and paxillin-mKate2. Blue arrowhead points at the bleb. Red arrowhead marks at the stable paxillin localization. Frames from **Video 15**. N = 3. Scale bar = 10  $\mu$ m. (B) Confocal scan of rim cell in opo morphant embryos with mosaic expression of mKate2-ras and paxillin-mKate2. Blue arrowhead points at the bleb. Red arrowhead marks at the transient paxillin localization. Frames from **Video 16**. N = 3. Scale bar = 10  $\mu$ m. (C) Confocal scan of rim cells exhibiting blebs (blue arrowhead) in laminin morphants mosaically labeled by mKate2-ras with DD-myl12b-GFP (left) and GFP-UtrophinCH (right). Yellow arrowhead marks the localization of DD-myl12b-GFP outside and UtrophinCH inside the bleb. Scale bar = 2  $\mu$ m. (D) Confocal scans of rim zone showing GFP-ras expressing opo morphant clone in control embryos. N = 4 out of 5 transplanted embryos. Blue arrow points at the basal blebs exhibited by the transplanted morphants cells. Scale bar = 5  $\mu$ m.

DOI: [10.7554/eLife.22689.047](https://doi.org/10.7554/eLife.22689.047)



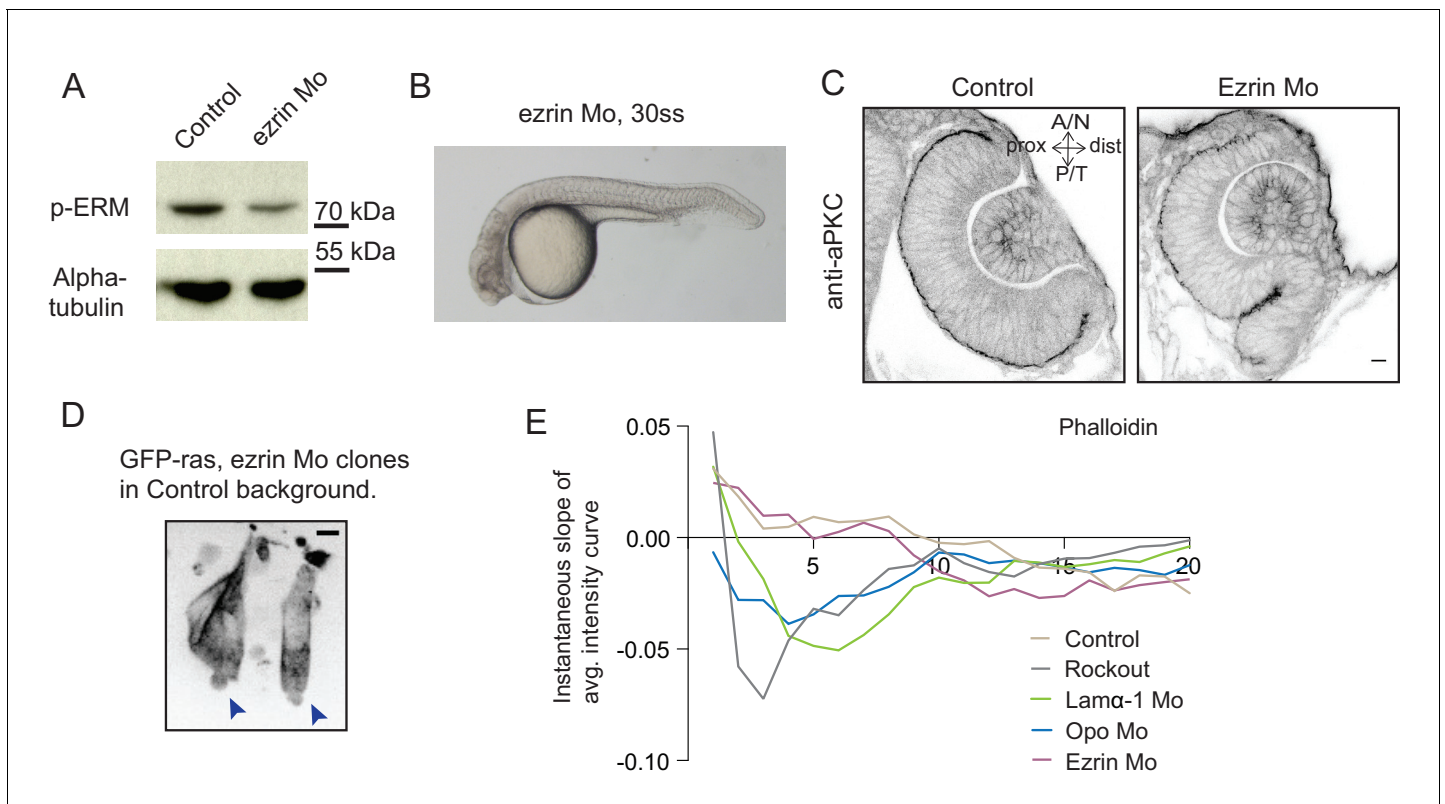

**Figure 5—figure supplement 2.** Analysis of ezrin morphant condition. (A) Western blot for p-ERM and alpha tubulin in control and ezrin morphant. (B) Brightfield image of Ezrin morphant embryo at 30 ss stage. (C) Confocal scan of 30 ss RNE in control (left), ezrin morphant (right) stained for aPKC. Morphant shows S-shaped RNE. N = 5. Scale bar = 10  $\mu$ m. (D) Confocal scan of rim zone showing GFP-ras expressing ezrin morphant clone in a control embryo. N = 2 out of 4 transplanted embryos. Blue arrows point at the basal blebs exhibited by the transplanted morphants cells. Scale bar = 5  $\mu$ m. (E) Instantaneous slope of the average intensity curves for phalloidin plotted for the basal 20% height of the neuroepithelial volume. The position on the X-axis marks the position along the apicobasal axis. The analysis was performed using the data from **Figures 1F, 2C and 5D** and **Figure 4—figure supplement 3C,D**. See **Figure 5—source data 3**.

DOI: 10.7554/eLife.22689.048

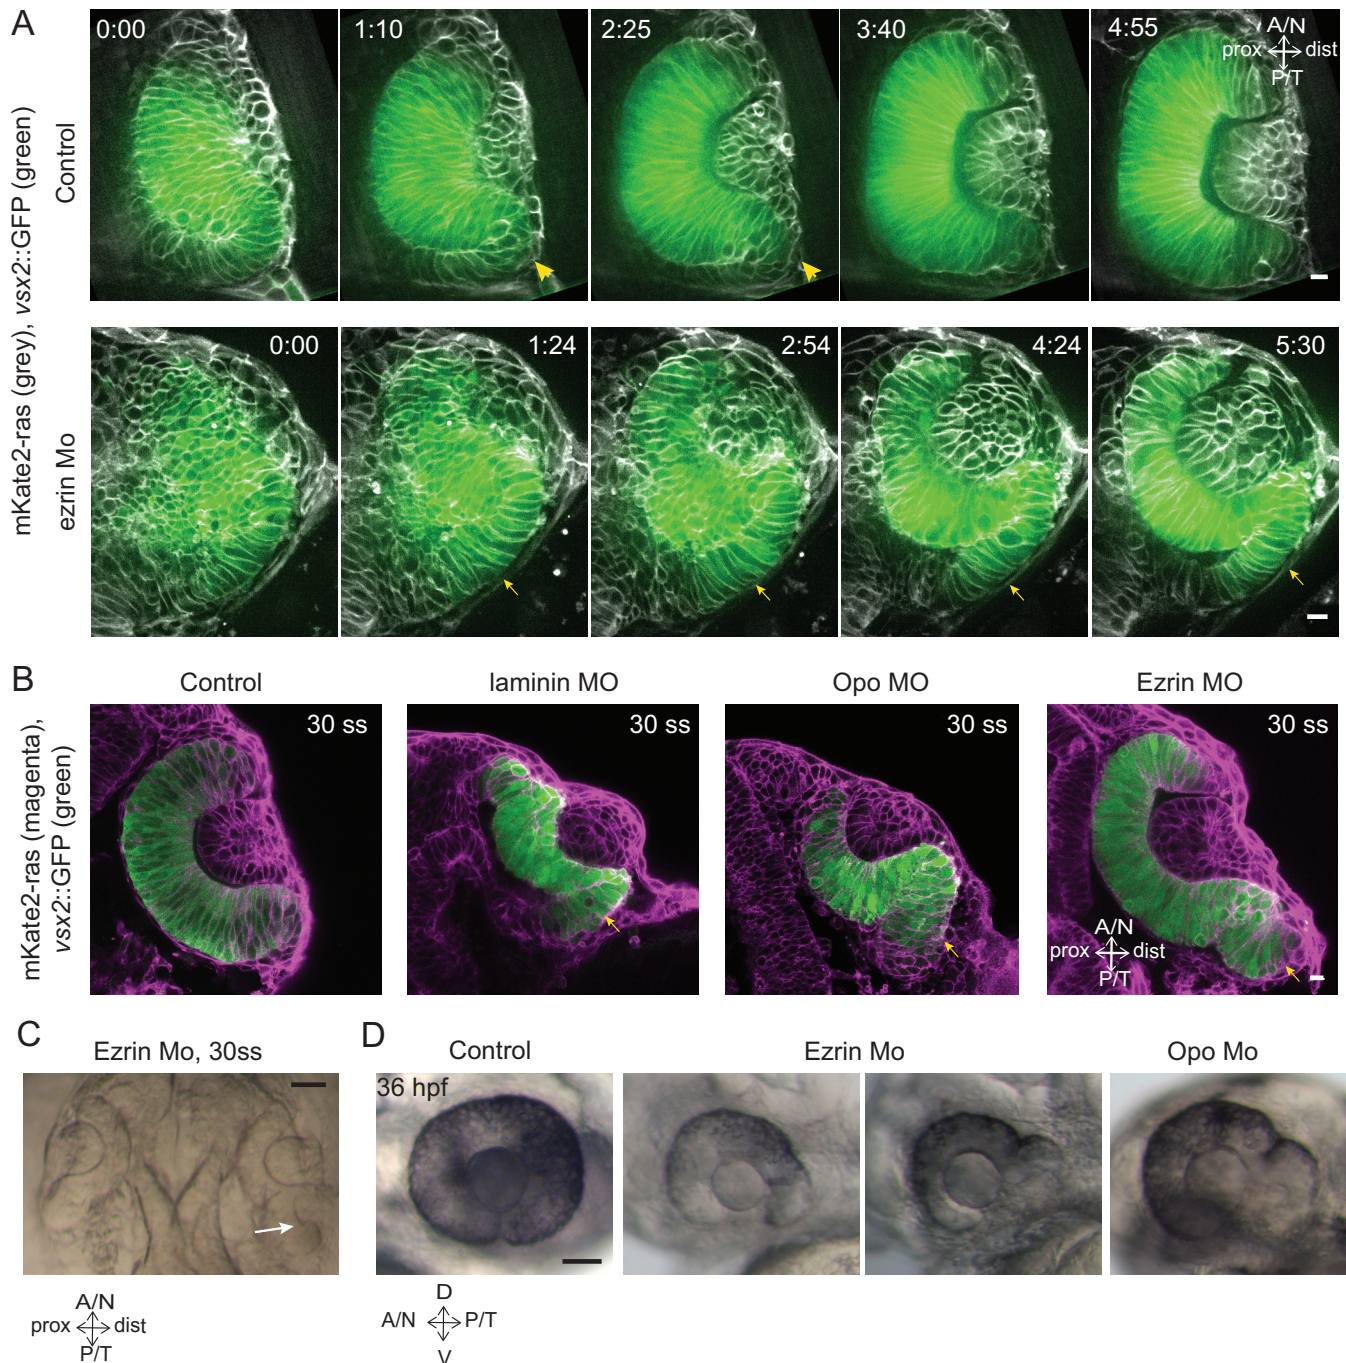

**Figure 6.** Impairment of rim involution leads to mispositioning of neuroepithelial cells. **(A)** Time-lapse imaging of control and *ezrin* morphant condition in Tg(*vsx2::GFP*,  *$\beta$ actin::mKate2ras*) background. Arrowheads mark rim zone in control. Arrows mark rim cells that failed to migrate in *ezrin* morphant. Frames from **Videos 19** and **20**. Time in h:min. Videos started at 16 ss -17 ss. N = 9. **(B)** Confocal scans of optic cups at 30 ss in control, laminin morphant, Opo morphant and *ezrin* morphant conditions in Tg(*vsx2::GFP*,  *$\beta$ actin::mKate2-ras*). Embryos were stained for GFP and mKate-2. Arrows point at the ectopic RNE cells. N = 7 each. **(C)** Brightfield image of 30 ss *ezrin* morphant showing secondary optic cup phenotype. Arrow marks secondary invagination zone. **(D)** Brightfield images of 36 hpf control embryos, *ezrin* morphants and *opo* morphant. Scale bars in **(A,B)** =10  $\mu$ m and **(C, D)** = 50  $\mu$ m.

Figure 6 continued on next page

*Figure 6 continued*

DOI: [10.7554/eLife.22689.051](https://doi.org/10.7554/eLife.22689.051)



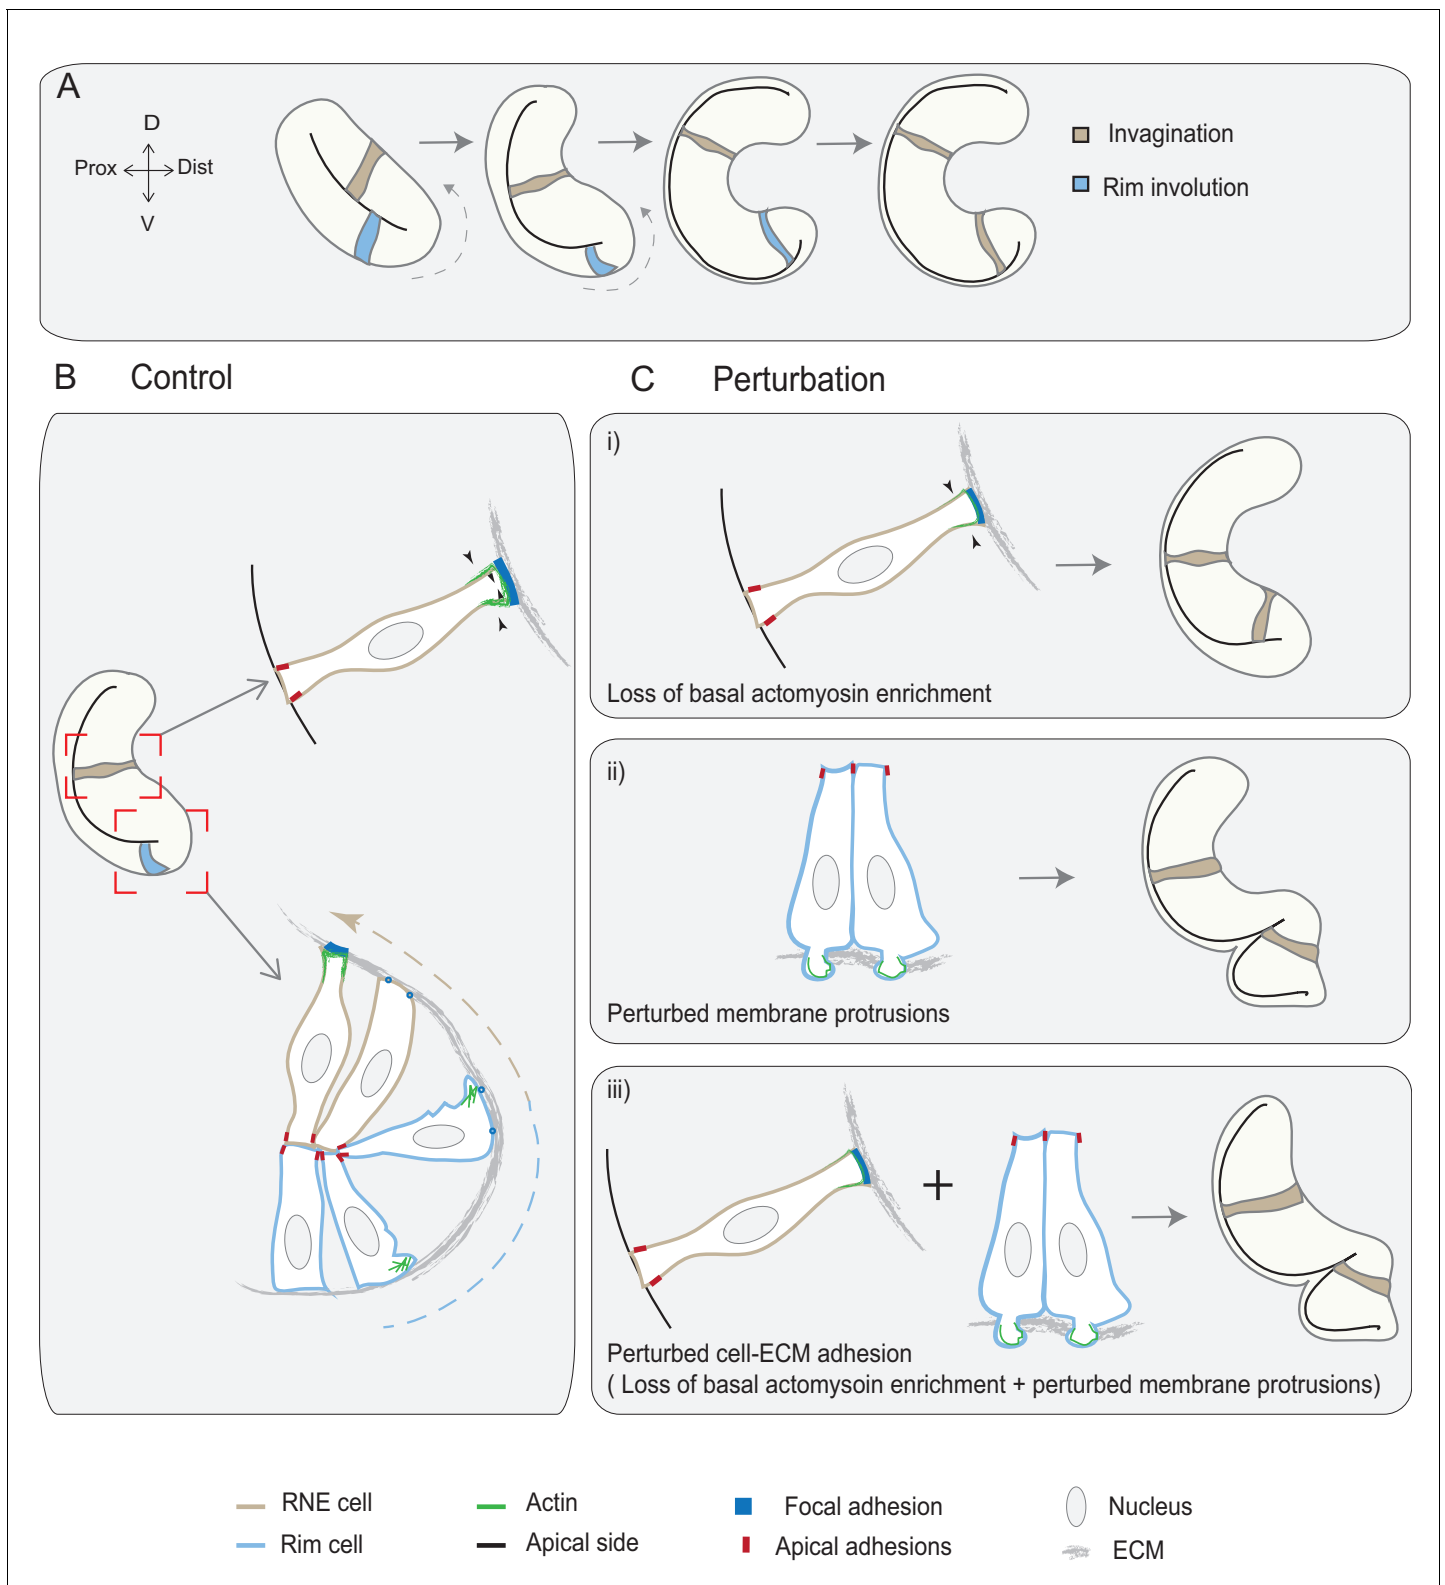

**Figure 7.** Concerted action of basal cell area shrinkage and rim involution shapes the hemispheric RNE. **(A)** Schematic representation of RNE morphogenesis. The cells in the bilayered optic vesicle shape the RNE into a hemispheric cup. RNE cells in the distal layer (brown) contribute to invagination and prospective neuroepithelial cells (blue) undergo rim involution to reach the inner layer of the cup. **(B)** In control conditions, invagination is driven by basal area reduction that is guided by basally enriched actomyosin-driven constriction and overall compaction by increasing

*Figure 7 continued on next page*

*Figure 7 continued*

number of cells. Rim involution is driven by collective and directed migration of the epithelium at the rim of the developing optic cup. Protrusive migratory dynamics of rim cells change to adherent behavior when cells reach the inner layer. (C) Effect of cellular perturbations on the RNE architecture. (i) Loss of basal actomyosin enrichment slows the invagination process, which can result in a wider optic cup. (ii) Perturbation of lamellipodial membrane protrusions affects the migratory behavior and the optic cup architecture, resulting in an S-shaped optic cup. (iii) Perturbation of cell-ECM adhesion results in both loss of basal actomyosin accumulation in the invaginating zone and perturbed lamellipodial membrane protrusions in the rim zone. Such combined effect leads to a severe optic cup phenotype.

DOI: [10.7554/eLife.22689.053](https://doi.org/10.7554/eLife.22689.053)
