# Supplementary material for: Concerted action of neuroepithelial basal shrinkage and active epithelial migration ensures efficient optic cup morphogenesis
Source: eLife. 2017 Apr 4;6:e22689. doi: 10.7554/eLife.22689 (PMC5380436; doi:10.7554/eLife.22689)
Supplement: Supplementary file 1. — DOI: http://dx.doi.org/10.7554/eLife.22689.054 [file elife-22689-supp1.xlsx]

## Sheet: Sheet1
Embryo count for morpholino injections
laminin Morpholino injection	no. of embryos	Percentage
Epithelial accumulation at ventrotemporal side	54	46.9565
Protruding lens phenotype without epithelial accumulation	36	31.3043
No apparent optic cup phenotype	16	13.913
Severe phenotype (developmental delay or extreme deformities)	9	7.82609
Total	115	100
Opo Morpholino injection	no. of embryos	Percentage
Epithelial accumulation at ventrotemporal side	43	40.9524
Flat eye phenotype without epithelial accumulation	28	26.6667
No aparrant optic cup phenotype	22	20.9524
Severe phenotype (developmental delay or extreme deformities)	12	11.4286
Total	105	100
ezrin Morpholino injection	no. of embryos	Percentage
Epithelial accumulation at ventrotemporal side	39	50
Optic cup phenotype without epithelial accumulation	16	20.5128
No apparent optic cup phenotype	7	8.97436
Severe phenotype (developmental delay or extreme deformities)	16	20.5128
Total	78	100
